# Supplementary material for: Synthesis and [3,3]-sigmatropic rearrangements of 5-(pentafluorosulfanyl)-pent-3-en-2-ol, its homologues, and trifluoromethyl analogues
Source: Royal Society of Chemistry journal article supplement (doi:10.1039/d1ob00870f), 2021-01-01

## Electronic Supporting Information

### Synthesis and [3,3]-Sigmatropic Rearrangements of (*E*)-5-(Pentafluoro- $\lambda^6$ -sulfanyl)-pent-3-en-2-ol, its Homologues and Trifluoromethyl Analogues

Piotr Dudziński,<sup>a</sup> Wibke S. Husstedt,<sup>a</sup> Andrej V. Matsnev,<sup>b</sup> Joseph S. Thrasher,<sup>b</sup> and  
Günter Haufe<sup>\*a</sup>

<sup>a</sup> *Organisch-Chemisches Institut, Westfälische Wilhelms-Universität Münster, Corrensstraße 40,  
D-48149 Münster, Germany*

<sup>b</sup> *Department of Chemistry, Advanced Materials Research Laboratory, Clemson University,  
91 Technology Drive, Anderson, South Carolina 29625, United States*

### Table of contents

|                                                                                                                                                                             |     |
|-----------------------------------------------------------------------------------------------------------------------------------------------------------------------------|-----|
| Optimization experiments of Johnson-Claisen rearrangements of ( <i>E</i> )-1-(pentafluoro- $\lambda^6$ -sulfanyl)penta-1,4-dien-3-ol ( <b>2g</b> )                          | S2  |
| Efforts for Ireland-Claisen rearrangements of ( <i>E</i> )-1-(pentafluoro- $\lambda^6$ -sulfanyl)alk-1-en-3-yl-esters ( <b>4a-c</b> )                                       | S2  |
| Efforts for ester enolate-Claisen rearrangements of <i>N</i> -Boc-( <i>E</i> )-1-(pentafluoro- $\lambda^6$ -sulfanyl)alk-1-en-3-yl-glycinates ( <b>4d-f</b> and <b>4i</b> ) | S3  |
| Trials of Pd(0)-catalyzed allylic rearrangement of mesylate <b>15</b>                                                                                                       | S6  |
| X-Ray data of compound <b>4d</b>                                                                                                                                            | S7  |
| NMR data with signal assignments                                                                                                                                            | S9  |
| Copies of NMR spectra                                                                                                                                                       | S22 |

### Optimization experiments of Johnson-Claisen rearrangements of (*E*)-1-(pentafluoro- $\lambda^6$ -sulfanyl)penta-1,4-dien-3-ol (**2g**)

Johnson-Claisen rearrangements were executed both with trimethyl- as well as with triethyl orthoacetate under the conditions shown in Table S1.

**Table S1.** Synthesis of  $\zeta$ -SF<sub>5</sub>-substituted  $\gamma,\delta,\epsilon,\zeta$ -unsaturated esters **10g** by Johnson-Claisen rearrangement of **2g**.

| Entry          | R  | Solvent                              | Acid                                            | Temperature, Time            | Yield of <b>10</b> [%]  |
|----------------|----|--------------------------------------|-------------------------------------------------|------------------------------|-------------------------|
| 1              | Me | Toluene                              | C <sub>2</sub> H <sub>5</sub> CO <sub>2</sub> H | 115 °C, 5 h                  | <b>10g1</b> (R=Me) 31   |
| 2              | Me | CH <sub>3</sub> C(COMe) <sub>3</sub> | C <sub>2</sub> H <sub>5</sub> CO <sub>2</sub> H | 110 °C, 2 h                  | <b>10g1</b> (R=Me) 92*  |
| 3 <sup>a</sup> | Et | CH <sub>3</sub> C(COEt) <sub>3</sub> | C <sub>2</sub> H <sub>5</sub> CO <sub>2</sub> H | 150 °C, 5 h                  | <b>10g2</b> (R=Et) 27** |
| 4              | Et | CH <sub>3</sub> C(COEt) <sub>3</sub> | <i>p</i> -TsOH                                  | 150 °C, 5 h                  | <b>10g2</b> (R=Et) 8**  |
| 5              | Et | CH <sub>3</sub> C(COEt) <sub>3</sub> | C <sub>2</sub> H <sub>5</sub> CO <sub>2</sub> H | 120 °C, 0.5 h, $\mu = 150$ W | <b>10c2</b> (R=Et) 26** |

<sup>a</sup> trace amount of hydroquinone was added, \*yield by <sup>19</sup>F NMR spectroscopy \*\*yield by GC

The yield of product **10g1** (R = Me) could be increased when the orthoester was used as solvent and temperature was slightly reduced (entry 2). The rearrangement was also successful with triethyl orthoacetate preferably when propionic acid was used as catalyst (entries 3 and 4). The yield was not increased when lower temperature in combination with microwave irradiation was applied (entries 3 and 5).

### Efforts for Ireland-Claisen rearrangements of (*E*)-1-(pentafluoro- $\lambda^6$ -sulfanyl)alk-1-en-3-yl-esters (**4a-c**)

Treatment of compound **4a** with 1.2 equiv of each Et<sub>3</sub>N and TMSOTf in CH<sub>2</sub>Cl<sub>2</sub> at different temperatures (r.t. to 50 °C) in a sealed tube for 24 hours resulted in complete decomposition of the **4a**. The same result was observed when this ester was treated with 1.2 equiv of LHMDS and 9.7 equiv of TMSCl in THF at 80 °C for 24 hours. When the latter components were reacted at r.t. for 6 h, in addition to the decomposition fragments some starting material was found in the black product mixture. In none of the experiments, were traces of the expected product detected in the crude product by <sup>19</sup>F NMR (Table S2).

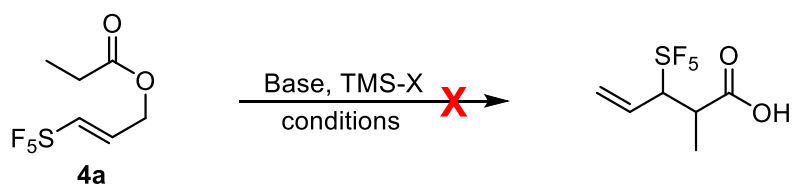

**Table S2.** Efforts for Ireland-Claisen rearrangement of **4a**.

| Entry | Base              | equiv | Solvent                         | X (equiv) | Temp. | Time | Result  |
|-------|-------------------|-------|---------------------------------|-----------|-------|------|---------|
| 1     | Et <sub>3</sub> N | 1.2   | CH <sub>2</sub> Cl <sub>2</sub> | OTf (1.2) | 50 °C | 24 h | Decomp. |
| 2     | LHMDS             | 1.2   | THF                             | Cl (9.7)  | r.t.  | 6 h  | Decomp. |
| 3     | LHMDS             | 1.2   | THF                             | Cl (9.7)  | 80 °C | 24 h | Decomp. |

Then we treated the methoxy-substituted allylic acetates **4b** and **4c** with LHMDS/TMSCl in THF at room temperature or 60 °C, the conditions which were successfully used by Konno et al. [1] for the Ireland-Claisen rearrangement of corresponding CF<sub>3</sub> compounds. In none of the reactions were the expected products found in the crude product mixtures by <sup>19</sup>F NMR spectroscopy.

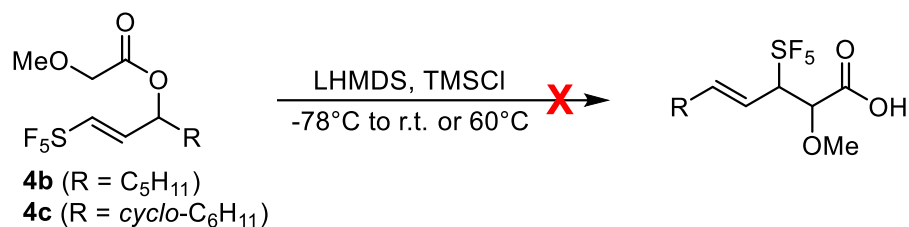

### Efforts for ester enolate-Claisen rearrangements of *N*-Boc-(*E*)-1-(pentafluoro- $\lambda^6$ -sulfanyl)alk-1-en-3-yl-glycinates (**4d-f** and **4i**)

Analogously to the protocols used by Konno et al. [1] or Tranel et al. [2], we subsequently tried to rearrange the *N*-Boc-glycinate **4d** under the conditions shown in Table S3. To our regret, no traces of the target  $\beta$ -SF<sub>5</sub>- $\gamma,\delta$ -unsaturated *N*-Boc-protected amino acid were found in the product mixtures by <sup>1</sup>H NMR spectroscopy. No new signals for vinylic hydrogens of the potential rearrangement product were found in the region between 5.2 and 6.4 ppm (Figure 1) (Table S3, entries 4, 5, 7 and 9). In cases where decomposition occurred (Table S3, entries 1-3, 6, 8), minor amount of the original 3-SF<sub>5</sub>-prop-2-en-1-ol was identified by <sup>19</sup>F NMR spectroscopy. A similar observation was described by Tranel et al. in their corresponding experiments [2].

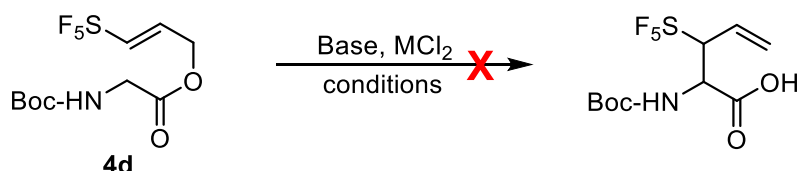

**Table S3:** Efforts for ester enolate-Claisen rearrangement of the *N*-Boc-glycinate **4d**.

| Entry          | Base (equiv) | Solvent           | MCl <sub>2</sub> (equiv) | Addition of ZnCl <sub>2</sub> | Temperature    | Time | Result            |
|----------------|--------------|-------------------|--------------------------|-------------------------------|----------------|------|-------------------|
| 1 <sup>a</sup> | LDA (3.0)    | Et <sub>2</sub> O | ZnCl <sub>2</sub> (1.2)  | 30 ml/h                       | -78 °C to r.t. | 16 h | decomp.           |
| 2 <sup>a</sup> | LDA (3.0)    | THF               | ZnCl <sub>2</sub> (1.2)  | 20 ml/h                       | -78 °C to r.t. | 16 h | decomp.           |
| 3 <sup>a</sup> | LDA (3.0)    | THF               | ZnCl <sub>2</sub> (1.2)  | 17 ml/h                       | -78 °C to r.t. | 16 h | decomp.           |
| 4 <sup>b</sup> | LHMDS (1.2)  | THF               | ZnCl <sub>2</sub> (5.5)  | -                             | 0 °C to r.t.   | 16h  | s.m. <sup>c</sup> |
| 5 <sup>b</sup> | LHMDS (1.2)  | THF               | ZnCl <sub>2</sub> (5.5)  | -                             | 0 °C to reflux | 3 h  | s.m. <sup>c</sup> |
| 6 <sup>b</sup> | LHMDS (3.0)  | Et <sub>2</sub> O | ZnCl <sub>2</sub> (5.4)  | -                             | -78 °C to r.t. | 48 h | decomp.           |
| 7 <sup>b</sup> | LHMDS (6.0)  | THF               | ZnCl <sub>2</sub> (6.0)  | -                             | 0 °C to reflux | 4 h  | s.m. <sup>c</sup> |
| 8 <sup>b</sup> | LHMDS (6.0)  | THF               | ZnCl <sub>2</sub> (6.0)  | -                             | 0 °C to reflux | 10 h | decomp.           |
| 9 <sup>b</sup> | LHMDS (6.0)  | THF               | MgCl <sub>2</sub> (6.0)  | -                             | 0 °C to reflux | 10 h | s.m. <sup>c</sup> |

<sup>a</sup> **Method A:** The ester and the solution of MCl<sub>2</sub> were added to the base, <sup>b</sup> **Method B:** The base was added to the solution of the ester and MCl<sub>2</sub>, <sup>c</sup> Starting material recovered

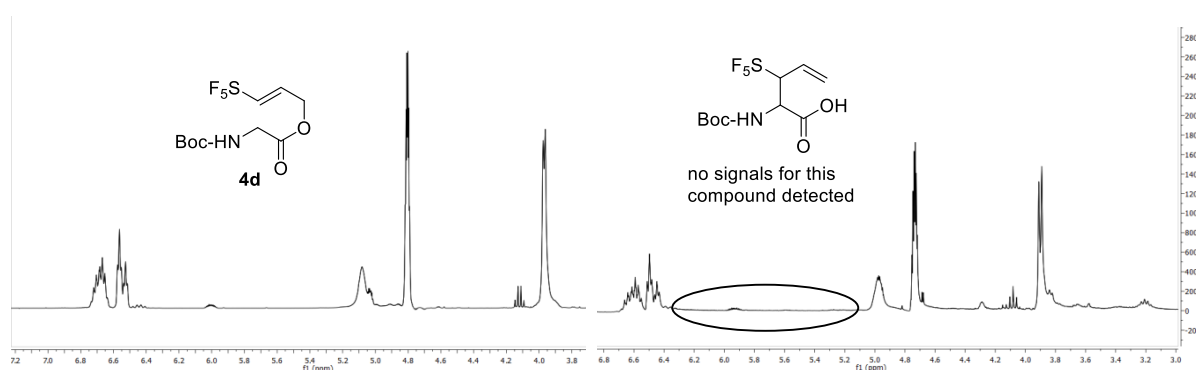

**Fig. S1.** <sup>1</sup>H NMR spectra of the starting Boc-glycinates **4d** (left) and the crude reaction mixture after workup (right).

Also our efforts to rearrange the *N*-Boc-protected glycinate **4e** were not successful. After workup of the reaction mixture, most of the starting material was recovered (Table S4).

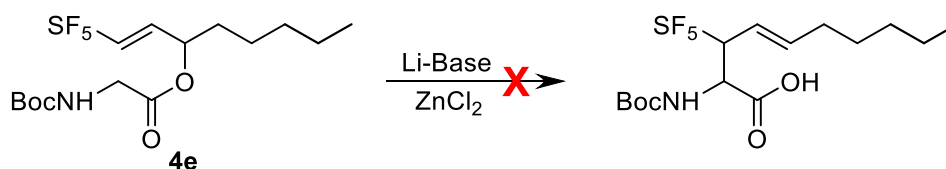

**Table S4.** Trials for ester enolate-Claisen rearrangement of allyl Boc-glycinate **4e**

| Entry          | Base (equiv) | Solvent           | ZnCl <sub>2</sub> (equiv) | Temperature      | Time | Result            |
|----------------|--------------|-------------------|---------------------------|------------------|------|-------------------|
| 1 <sup>b</sup> | LHMDS (3.2)  | THF               | 6.6                       | reflux           | 15 h | s.m. <sup>c</sup> |
| 2 <sup>b</sup> | LDA (2.5)    | Et <sub>2</sub> O | 6.6                       | -78 °C to r.t.   | 18 h | s.m. <sup>c</sup> |
| 3 <sup>b</sup> | LHMDS (6.0)  | THF               | 6.6                       | reflux           | 15 h | s.m. <sup>c</sup> |
| 4 <sup>b</sup> | LDA (2.6)    | THF               | 2.6                       | reflux           | 15 h | s.m. <sup>c</sup> |
| 5 <sup>a</sup> | LDA (2.6)    | THF               | 4.0                       | -78 °C to reflux | 12 h | s.m. <sup>c</sup> |
| 6 <sup>a</sup> | LHMDS (4.0)  | Toluene:THF, 1:6  | 3.0                       | 0 °C to reflux   | 12 h | s.m. <sup>c</sup> |
| 7 <sup>b</sup> | LDA (3.0)    | Toluene           | 6.0                       | -78 °C to reflux | 12 h | s.m. <sup>c</sup> |

<sup>a</sup> **Method A:** The ester and the solution of ZnCl<sub>2</sub> were added to the base, <sup>b</sup> **Method B:** The base was added to the solution of the ester and ZnCl<sub>2</sub>, <sup>c</sup> Starting material recovered

In order to increase the C-H acidity of the α-methylene proton of the glycinate, the Boc group was replaced by the more electron withdrawing TFA protecting group. However, again no rearrangement product was identified after workup of the reaction mixture (Table S5).

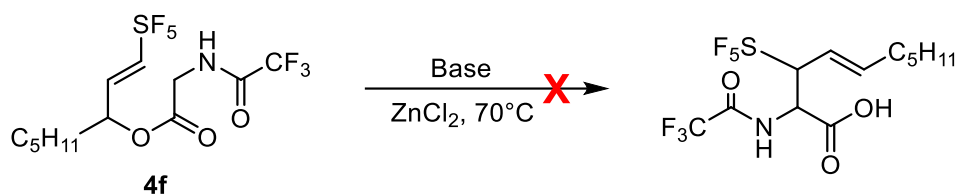**Table S5.** Efforts for ester enolate-Claisen rearrangement of **4f**.

| Entry          | Base  | Equiv | ZnCl <sub>2</sub> (equiv) | Time [h] | Result                       |
|----------------|-------|-------|---------------------------|----------|------------------------------|
| 1 <sup>b</sup> | LHMDS | 6.0   | 6.0                       | 2        | SF <sub>5</sub> -Elimination |
| 2 <sup>b</sup> | LDA   | 3.0   | 6.0                       | 4        | Partial hydrolysis           |
| 3 <sup>a</sup> | LHMDS | 6.0   | 6.0                       | 6        | Decomposition                |

<sup>a</sup> **Method A:** The ester and the solution of ZnCl<sub>2</sub> were added to the base, <sup>b</sup> **Method B:** The base was added to the solution of the ester and ZnCl<sub>2</sub>.

In order to prove that the α-C-H position to the ester group is actually more C-H-acidic than the allylic position activated by the electron withdrawing effect of the SF<sub>5</sub>-substituted double bond, we treated **4f** with different bases at very low temperature and added excess methyl iodide. Indeed, in all cases, the methylation occurred at the α-position to the ester group to form compounds **4f1**. The alternative product **4f2** was not found.

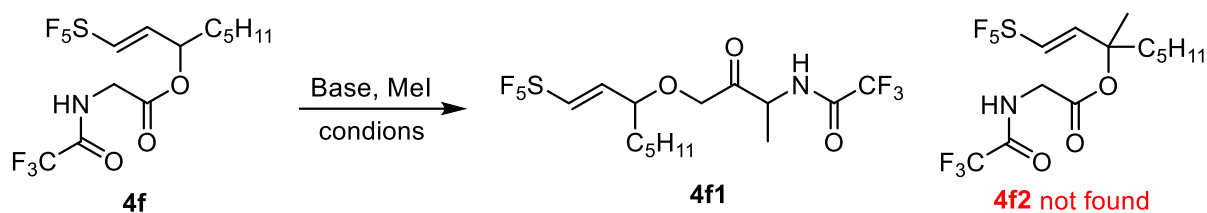

**Table S6.** Deprotonation of compound **4f** at low temperature and methylation with MeI.

| Entry          | Base  | Equiv | Solvent           | Temperature [°C] | Produkt    |
|----------------|-------|-------|-------------------|------------------|------------|
| 1 <sup>b</sup> | LDA   | 2.5   | THF               | -78              | <b>4f1</b> |
| 2 <sup>b</sup> | LDA   | 2.5   | Et <sub>2</sub> O | -78              | <b>4f1</b> |
| 3 <sup>b</sup> | LHMDS | 2.5   | THF               | -78              | <b>4f1</b> |
| 4 <sup>b</sup> | LHMDS | 2.5   | Et <sub>2</sub> O | -78              | <b>4f1</b> |
| 5 <sup>b</sup> | LHMDS | 2.5   | THF               | -95              | <b>4f1</b> |
| 6 <sup>a</sup> | LDA   | 2.5   | THF               | -78              | <b>4f1</b> |

<sup>a</sup> **Method A:** The ester and the solution of ZnCl<sub>2</sub> were added to the base, <sup>b</sup> **Method B:** The base was added to the solution of the ester and ZnCl<sub>2</sub>.

This means that the first step of the desired [3,3]-sigmatropic rearrangements, namely the deprotonation of the α-C-H position and formation of the ester enolate can occur, but the formation of the transition state for the Claisen rearrangement is blocked by the sterically demanding SF<sub>5</sub> group.

### Trials of Pd(0)-catalyzed allylic rearrangement of mesylate **15**

The target rearrangement product **16** was not found in the product mixture of this reaction (see the main text). Instead, compounds **17a**, **17b**, and **18** were likely made as shown by NMR spectroscopy, but were not isolated in pure form. Figure S1 shows selected <sup>19</sup>F and <sup>1</sup>H NMR data of the products obtained after treatment of **15** with Pd(PPh<sub>3</sub>)<sub>4</sub> and workup. The mechanism of formation is similar to that previously discussed for a related reaction [3].

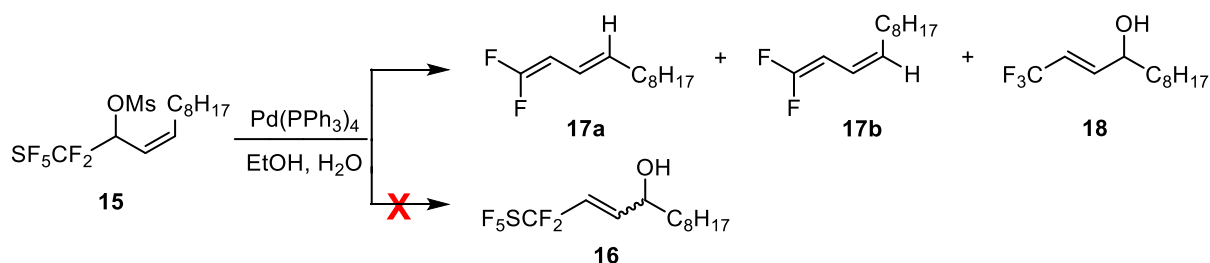

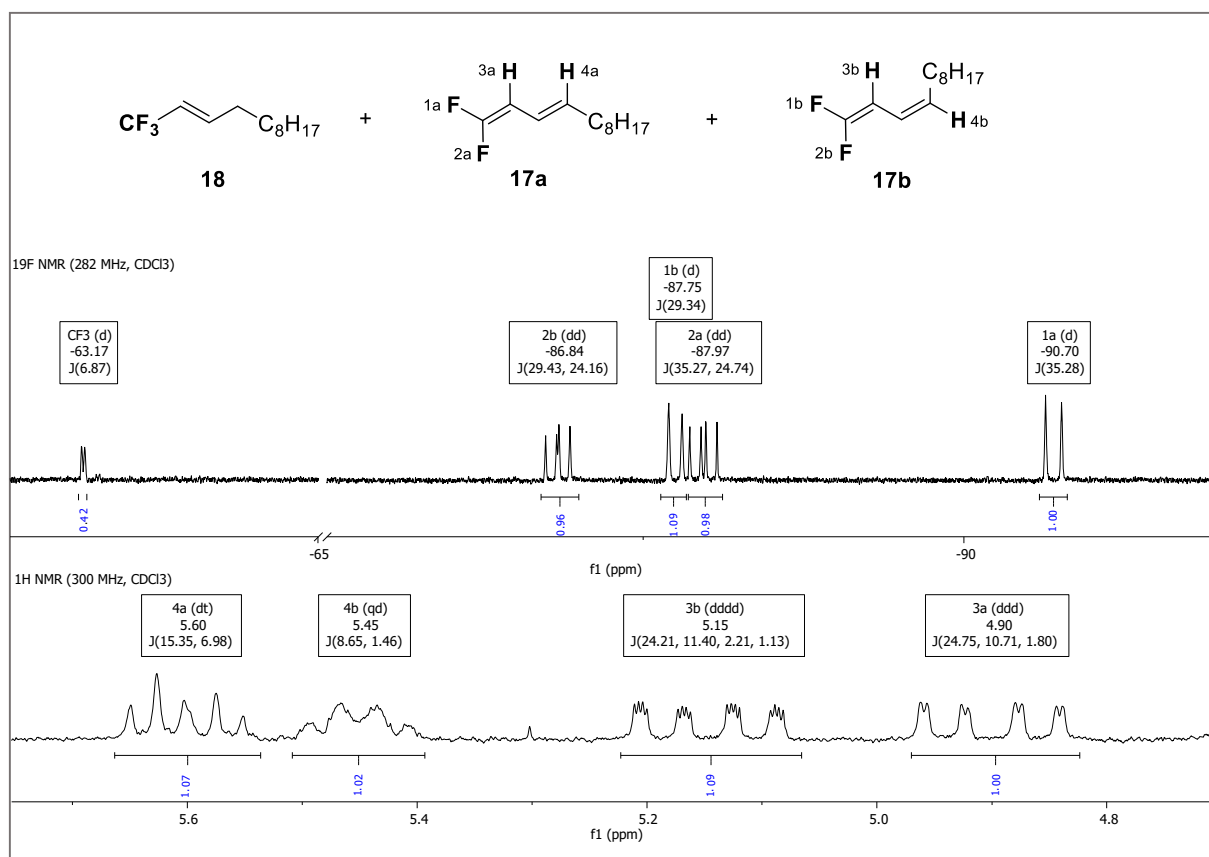

**Figure S1.** Selected  $^{19}\text{F}$  and  $^1\text{H}$  NMR data of the products obtained after treatment of **15** with  $\text{Pd}(\text{PPh}_3)_4$ .

## References:

- [1] T. Konno, H. Umetani and T. Kitazume, Highly Stereoselective Synthesis of Trifluoromethylated Compounds via Ester-Enolate [2,3]-Wittig and [3,3]-Ireland-Claisen Rearrangements, *J. Org. Chem.*, 1997, **62**, 137-150.
- [2] F. Tranel, R. Fröhlich and G. Haufe, Synthesis of  $\gamma$ -fluoro- $\alpha$ -amino acids by Claisen rearrangement, *J. Fluorine Chem.*, 2005, **126**, 557–569.
- [3] P. Dudziński, A. Matsnev, J. S. Thrasher and G. Haufe, Synthesis of  $\text{SF}_5\text{CF}_2$ -Containing Enones and Instability of This Group in Specific Chemical Environments and Reaction Conditions, *J. Org. Chem.*, 2016, **81**, 4454–4463.

## X-Ray data

**X-Ray diffraction:** Data sets for compound **4d** (CCDC 1973261, HAF4760) were collected with a Bruker APEX CCD diffractometer. Programs used: data collection, COLLECT [1]; data reduction Denzo-SMN [2]; absorption correction, Denzo [3]; structure solution SHELXT-2015 [4]; structure refinement SHELXL-2015 [5] and graphics, XP [6]. *R*-values are given for observed reflections, and *wR*<sup>2</sup> values are given for all reflections.

**Exceptions and special features:** The  $\text{SF}_5$  unit was found disordered over two positions in the asymmetric unit. Several restraints (SIMU, SADI, SAME, ISOR) were used in order improve refinement stability. The hydrogen at N8 atom was refined freely.

**X-ray crystal structure analysis of compound 4d, CCDC 1973261:** A colorless plate-like specimen of  $C_{10}H_{16}F_5NO_4S$ , approximate dimensions 0.050 mm  $\times$  0.100 mm  $\times$  0.350 mm, was used for the X-ray crystallographic analysis. The X-ray intensity data were measured. The integration of the data using an orthorhombic unit cell yielded a total of 2543 reflections to a maximum  $\theta$  angle of 68.06° (0.83 Å resolution), of which 2543 were independent (average redundancy 1.000, completeness = 95.2%,  $R_{sig} = 3.06\%$ ) and 2274 (89.42%) were greater than  $2\sigma(F^2)$ . The final cell constants of  $a = 13.4208(12)$  Å,  $b = 26.557(2)$  Å,  $c = 8.6349(9)$  Å, volume = 3077.6(5) Å<sup>3</sup>, are based upon the refinement of the XYZ-centroids of reflections above 20  $\sigma(I)$ . Data were corrected for absorption effects using the multi-scan method (SADABS). The calculated minimum and maximum transmission coefficients (based on crystal size) are 0.4710 and 0.8840. The structure was solved and refined using the Bruker SHELXTL Software Package, using the space group *Aba2*, with  $Z = 8$  for the formula unit,  $C_{10}H_{16}F_5NO_4S$ . The final anisotropic full-matrix least-squares refinement on  $F^2$  with 243 variables converged at  $R1 = 5.74\%$ , for the observed data and  $wR2 = 16.43\%$  for all data. The goodness-of-fit was 1.047. The largest peak in the final difference electron density synthesis was 0.202 e<sup>-</sup>/Å<sup>3</sup> and the largest hole was -0.280 e<sup>-</sup>/Å<sup>3</sup> with an RMS deviation of 0.044 e<sup>-</sup>/Å<sup>3</sup>. On the basis of the final model, the calculated density was 1.473 g/cm<sup>3</sup> and  $F(000)$ , 1408 e<sup>-</sup>.

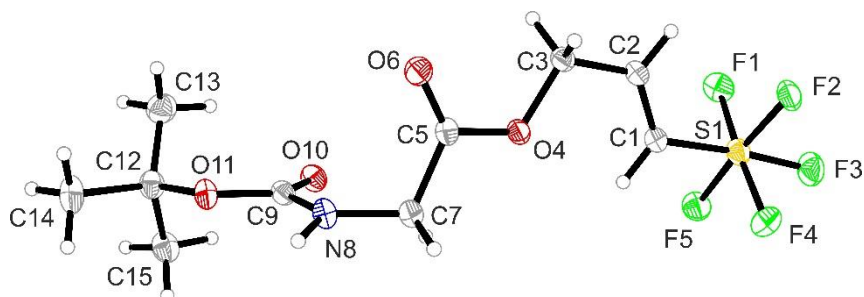

Figure S1: Crystal structure of compound **4d** (CCDC 1973261, HAF4760). Thermal ellipsoids are set at 15% probability.

#### References X-Ray Part:

1. COLLECT, R. W. W. Hoof, Bruker AXS, 2008, Delft, The Netherlands.
2. Denzo-SMN, Z. Otwinowski and W. Minor, *Methods Enzymol.*, 1997, **276**, 307-326.
3. Denzo, Z. Otwinowski, D. Borek, W. Majewski and W. Minor, *Acta Cryst.*, 2003, **A59**, 228-234.
4. G. M. Sheldrick, SHELXT – Integrated space-group and crystal-structure determination, *Acta Cryst.*, 2015, **A71**, 3-8.
5. G. M. Sheldrick, Crystal structure refinement with SHELXL, *Acta Cryst.*, 2015, **C71**, 3-8.
6. XP – Interactive molecular graphics, Version 5.1, Bruker AXS Inc., Madison, Wisconsin, USA, 1998.



## NMR data with signal assignments

(*E*)-3-(Pentafluoro- $\lambda^6$ -sulfanyl)allyl propionate (**4a**).  $^1\text{H}$  NMR (300 MHz,  $\text{CDCl}_3$ ):  $\delta$  6.73–6.50

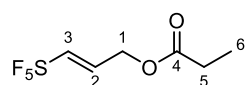

(m, 2H, 3-/2-CH), 4.74 (m, 2H, 1- $\text{CH}_2$ ), 2.42 (q,  $^3J_{\text{H,H}} = 7.6$  Hz, 2H, 5- $\text{CH}_2$ ), 1.18 (t,  $^3J_{\text{H,H}} = 7.6$  Hz, 3H, 6- $\text{CH}_3$ );  $^{13}\text{C}\{^1\text{H}\}$  NMR (75 MHz,  $\text{CDCl}_3$ ):  $\delta$  173.5 (C-4), 141.6 (dqu,  $^2J_{\text{C,F}} = 21.2$  Hz,  $^2J_{\text{C,F}} = 1.2$  Hz, C-3), 132.7 (qu,  $^3J_{\text{C,F}} = 7.1$  Hz, C-2), 60.6 (C-1), 27.2 (C-5), 8.9 (C-6);  $^{19}\text{F}$  NMR (282 MHz,  $\text{CDCl}_3$ ):  $\delta$  82.42 (mqu,  $^2J_{\text{F,F}} = 150.5$  Hz 1F, SF), 62.80 (dm,  $^2J_{\text{F,F}} = 150.5$  Hz, 4F,  $\text{SF}_4$ ).

(*E*)-1-(Pentafluoro- $\lambda^6$ -sulfanyl)oct-1-en-3-yl 2-methoxyacetate (**4b**).  $^1\text{H}$  NMR (300 MHz,

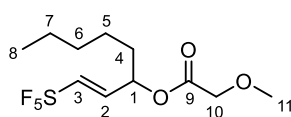

$\text{CDCl}_3$ ):  $\delta$  6.51 (dqu,  $^3J_{\text{H,H}} = 14.7$  Hz,  $^3J_{\text{F,H}} = 6.2$  Hz, 1H, 3-CH), 6.36 (ddqu,  $^3J_{\text{H,H}} = 14.7$  Hz,  $^3J_{\text{H,H}} = 5.8$  Hz,  $^4J_{\text{F,H}} = 1.5$  Hz, 1H, 2-CH), 5.42 (dt,  $^3J_{\text{H,H}} = 5.8$  Hz,  $^4J_{\text{H,H}} = 1.5$  Hz, 1H, 1-CH), 4.01 (s, 2H, 10- $\text{CH}_2$ ), 3.40 (s, 3H, 11- $\text{CH}_3$ ), 1.71–1.58 (m, 2, 7- $\text{CH}_2$ ), 1.33–1.12 (m, 6H, 4- $\text{CH}_2$  to 6- $\text{CH}_2$ ), 0.82 (t,  $^3J_{\text{H,H}} = 6.5$  Hz, 3H, 8- $\text{CH}_3$ );  $^{13}\text{C}\{^1\text{H}\}$  NMR (75 MHz,  $\text{CDCl}_3$ ):  $\delta$  169.2 (C-9), 136.0 (dqu,  $^3J_{\text{C,F}} = 21.1$  Hz, C-3), 136.0 (dqu,  $^4J_{\text{C,F}} = 6.9$  Hz, C-2), 71.4 (C-1), 69.6 (C-10), 59.4 (C-11), 33.6 (C-4), 31.3 (C-5), 24.4 (C-6), 22.4 (C-7), 13.9 (C-8);  $^{19}\text{F}$  NMR (282 MHz,  $\text{CDCl}_3$ ):  $\delta$  82.48 (mqu,  $^2J_{\text{F,F}} = 150.9$  Hz, 1F, SF), 63.08 (dm,  $^2J_{\text{F,F}} = 150.9$  Hz, 4F,  $\text{SF}_4$ ).

(*E*)-1-cyclohexyl-3-(pentafluoro- $\lambda^6$ -sulfanyl)allyl 2-methoxyacetate (**4c**).  $^1\text{H}$  NMR (300 MHz,

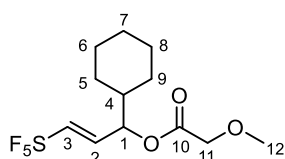

$\text{CDCl}_3$ ):  $\delta$  6.56 (m, 1H, 3-CH), 6.42 (ddm,  $^3J_{\text{H,H}} = 14.7$ ,  $^3J_{\text{H,H}} = 6.1$ ,  $^4J_{\text{H,F}} = 1.0$  Hz, 1H, 2-CH), 5.35–5.27 (m, 1H, 1-CH), 4.09 (s, 2H, 11- $\text{CH}_2$ ), 3.47 (s, 3H, 12- $\text{CH}_3$ ), 1.85–0.95 (m, 13H, 4-CH/5-/6-/7-/8-/9- $\text{CH}_2$ );  $^{13}\text{C}\{^1\text{H}\}$  NMR (75 MHz,  $\text{CDCl}_3$ ):  $\delta$  169.2 (C-10), 142.1 (ddqu,  $^2J_{\text{C,F}} = 20.7$  Hz,  $^2J_{\text{C,F}} = 1.0$  Hz, C-3), 134.9 (dqu,  $^3J_{\text{C,F}} = 7.0$  Hz, C-2), 75.1 (C-1), 69.5 (C-11), 59.4 (C-12), 41.3 (C-4), 28.3 (C-5), 28.1 (C-9), 25.9 (C-6/8), 25.6 (C-7);  $^{19}\text{F}$  NMR (282 MHz,  $\text{CDCl}_3$ ):  $\delta$  82.00 (mqu,  $^2J_{\text{F,F}} = 150.9$  Hz, 1F, SF), 62.59 (dm,  $^2J_{\text{F,F}} = 150.9$  Hz, 4F,  $\text{SF}_4$ ).

(*E*)-3-(Pentafluoro- $\lambda^6$ -sulfanyl)allyl (tert-butoxycarbonyl)glycinate (**4d**).  $^1\text{H}$  NMR (300 MHz,

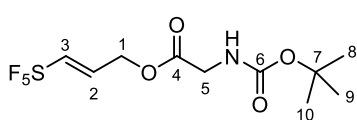

$\text{CDCl}_3$ ):  $\delta$  6.67 (m, 1H, 3-CH), 6.55 (dqu,  $^3J_{\text{H,H}} = 14.7$  Hz,  $^4J_{\text{H,F}} = 4.5$  Hz, 1H, 2-CH), 5.08 (s, 1H, 6-NH), 4.81 (m, 2H, 1- $\text{CH}_2$ ), 3.97 (bd,  $^3J_{\text{H,H}} = 5.8$  Hz, 2H, 5- $\text{CH}_2$ ), 1.46 (s, 9H, 8-/9-/10- $\text{CH}_3$ );  $^{13}\text{C}\{^1\text{H}\}$  NMR (75 MHz,  $\text{CDCl}_3$ ):  $\delta$  169.7 (C-4), 155.8 (C-6), 142.2 (dqu,  $^2J_{\text{C,F}} = 21.2$  Hz, C-3), 132.0 (dqu,  $^3J_{\text{C,F}} = 7.2$  Hz, C-2), 80.4 (C-5), 61.4 (C-1), 42.4 (C-7), 28.3 (C-8/9/10);  $^{19}\text{F}$  NMR (282 MHz,  $\text{CDCl}_3$ ):  $\delta$  82.19 (mqu,  $^2J_{\text{F,F}} = 149.1$  Hz, 1F, SF), 62.94 (dm,  $^2J_{\text{F,F}} = 149.1$  Hz, 4F,  $\text{SF}_4$ ).

(*E*)-1-(Pentafluoro- $\lambda^6$ -sulfanyl)oct-1-en-3-yl (tert-butoxycarbonyl)glycinate (**4e**).  $^1\text{H}$  NMR (300 MHz,  $\text{CDCl}_3$ ):  $\delta$  6.62 (m, 1H, 3-CH), 6.42 (dd, 1H,  $^3J_{\text{H,H}} = 14.7$  Hz,  $^3J_{\text{H,H}} = 5.5$  Hz, 1H, 2-CH), 5.44 (dd,  $^3J_{\text{H,H}} = 5.5$  Hz, 1H, 1-CH), 5.10 (s, 1H, N-H), 3.94 (d,  $^3J_{\text{H,H}} = 5.5$  Hz, 2H, 10-

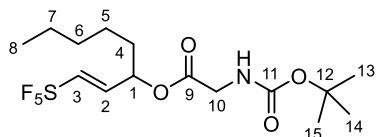

CH<sub>2</sub>), 1.87–1.58 (m, 2H, 4-CH<sub>2</sub>), 1.45 (s, 9H, /13-/14-/15-CH<sub>3</sub>), 1.40–1.19 (m, 6H, 5-/6-/7-CH<sub>2</sub>), 0.89 (t, <sup>3</sup>J<sub>H,H</sub> = 6.6 Hz, 3H, 8-CH<sub>3</sub>); <sup>13</sup>C{<sup>1</sup>H} NMR (75 MHz, CDCl<sub>3</sub>): δ 169.4 (C-9), 155.7 (C-11), 141.6 (qu, <sup>2</sup>J<sub>C,F</sub> = 21.1 Hz, C-3), 135.9 (dqu, <sup>3</sup>J<sub>C,F</sub> = 7.0 Hz, C-2), 80.2 (C-12), 71.9 (C-1), 42.4 (C-10), 33.6 (C-4), 31.2 (C-5), 28.2 (C-13/-14/-15), 24.3 (C-6), 22.3 (C-7), 13.8 (C-8); <sup>19</sup>F NMR (282 MHz, CDCl<sub>3</sub>): δ 84.67 (m, <sup>2</sup>J<sub>F,F</sub> = 150.1, 1F, SF), 62.89 (dm, <sup>2</sup>J<sub>F,F</sub> = 150.1, 4F, SF<sub>4</sub>).

(*E*)-1-(Pentafluoro-λ<sup>6</sup>-sulfanyl)oct-1-en-3-yl (2,2,2-trifluoroacetyl)glycinate (**4f**). <sup>1</sup>H NMR

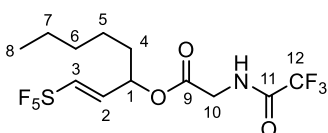

(300 MHz, CDCl<sub>3</sub>): δ 7.03 (bs, 1H, NH), 6.67 – 6.54 (m, 1H, 3-CH), 6.42 (ddm, <sup>3</sup>J<sub>H,H</sub> = 14.8 Hz, <sup>3</sup>J<sub>H,H</sub> = 5.9 Hz, 1H, 2-CH), 5.45 (ddt, <sup>3</sup>J<sub>H,H</sub> = 7.1 Hz, <sup>3</sup>J<sub>H,H</sub> = 5.9 Hz, <sup>4</sup>J<sub>H,H</sub> = 1.2 Hz, 1H, 1-CH), 4.17 (d, <sup>3</sup>J<sub>H,H</sub> = 5.4 Hz, 2H, 10-CH<sub>2</sub>), 1.80 – 1.64 (m, 2H, 4-CH<sub>2</sub>), 1.40 – 1.24 (m, 6H, 4-CH<sub>2</sub> to 7-CH<sub>2</sub>), 0.89 (t, 3H, 8-CH<sub>3</sub>); <sup>13</sup>C{<sup>1</sup>H} NMR (75 MHz, CDCl<sub>3</sub>): δ 167.4 (C-9), 157.5 (q, <sup>2</sup>J<sub>C,F</sub> = 38.2 Hz, C-11), 142.2 (dqu, <sup>2</sup>J<sub>C,F</sub> = 21.3 Hz, C-3), 135.4 (dqu, <sup>3</sup>J<sub>C,F</sub> = 7.0 Hz, C-2), 115.6 (q, <sup>1</sup>J<sub>C,F</sub> = 287.3 Hz, 12-CF<sub>3</sub>), 73.2 (C-10), 41.3 (C-1), 33.6 (C-4), 31.3 (C-5), 24.3 (C-6), 22.4 (C-7), 13.9 (C-8); <sup>19</sup>F NMR (282 MHz, CDCl<sub>3</sub>): δ 81.63 (m, <sup>2</sup>J<sub>F,F</sub> = 150.7, 1F, SF), 62.54 (dm, <sup>2</sup>J<sub>F,F</sub> = 150.7 Hz, 4F, SF<sub>4</sub>), -76.35 (s, 3 F, CF<sub>3</sub>).

(*E*)-1-Cyclohexyl-3-(pentafluoro-λ<sup>6</sup>-sulfanyl)allyl (tert-butoxycarbonyl)glycinate (**4g**). <sup>1</sup>H NMR

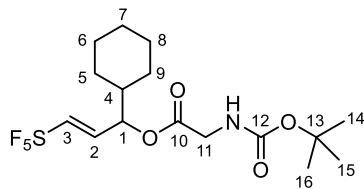

(300 MHz, CDCl<sub>3</sub>): δ 6.57 (m, 1H, 3-CH), 6.40 (ddqu, <sup>3</sup>J<sub>H,H</sub> = 14.7, <sup>4</sup>J<sub>H,H</sub> = 5.9, <sup>4</sup>J<sub>H,F</sub> = 0.9 Hz, 1H, 2-CH), 5.26 (m, 1H, 1-CH), 5.10 (s, 1H, N-H), 3.95 (dd, <sup>3</sup>J<sub>H,H</sub> = 5.4, <sup>3</sup>J<sub>H,H</sub> = 4.5 Hz, 2H, 11-CH<sub>2</sub>), 1.80–1.60 (m, 5H, 4-CH, 9-/5-CH<sub>2</sub>), 1.46 (s, 9H, 14-/15-/16-CH<sub>3</sub>), 1.35–0.82 (m, 6H, 6-/7-/8-CH<sub>2</sub>); <sup>13</sup>C{<sup>1</sup>H} NMR (75 MHz, CDCl<sub>3</sub>): δ 169.5 (10-C), 155.7 (12-C), 142.2 (qu, <sup>2</sup>J<sub>C,F</sub> = 20.4 Hz, 3-C), 134.9 (qu, <sup>3</sup>J<sub>C,F</sub> = 6.8 Hz, C-2), 80.2 (C-13), 65.9 (C-1), 42.5 (C-11), 41.4 (C-4), 28.3 (5-/9-CH), 28.2 (C-14/-15/-16), 26.0 (6-/8-CH), 25.7 (7-CH); <sup>19</sup>F NMR (282 MHz, CDCl<sub>3</sub>): δ 81.82 (m, <sup>2</sup>J<sub>F,F</sub> = 150.1, 1F, SF), 62.54 (dm, <sup>2</sup>J<sub>F,F</sub> = 150.8, 4F, SF<sub>4</sub>).

(*E*)-1-Cyclohexyl-3-(pentafluoro-λ<sup>6</sup>-sulfanyl)allyl 2-(1,3-dioxoisindolin-2-yl)acetate (**4h**).

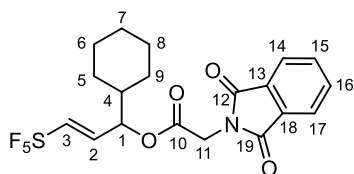

<sup>1</sup>H NMR (300 MHz, CDCl<sub>3</sub>): δ 7.95–7.73 (m, 4H, 14- to 17-CH), 6.53 (ddqu, <sup>3</sup>J<sub>F,H</sub> = 20.7 Hz, <sup>3</sup>J<sub>H,H</sub> = 6.1 Hz, <sup>4</sup>J<sub>H,H</sub> = 1.2 Hz, 1H, 3-CH), 6.40 (ddqu, <sup>3</sup>J<sub>H,H</sub> = 14.7 Hz, <sup>3</sup>J<sub>H,H</sub> = 5.6 Hz, <sup>4</sup>J<sub>F,H</sub> = 0.9 Hz, 1H, 2-CH), 5.35–5.25 (m, 1H, 1-CH), 4.50 (s, 2H, 11-CH<sub>2</sub>), 1.85–0.80 (m, 11H, 4-CH, 5 – 9-CH<sub>2</sub>); <sup>13</sup>C{<sup>1</sup>H} NMR (75 MHz, CDCl<sub>3</sub>): δ 167.4 (C-10), 166.3 (C-12/-19), 142.1 (qu, <sup>2</sup>J<sub>C,F</sub> = 20.6 Hz, C-3), 134.4 (qu, <sup>3</sup>J<sub>C,F</sub> = 7.0 Hz, C-2), 134.4 (C-13/-18), 131.9 (C-15/-16), 123.7 (C-14/-17), 76.3 (C-1), 41.4 (C-5), 38.9 (C-4), 28.4 (C-9), 27.9 (C-9), 26.0

(C-7), 25.7 (C-6/-8);  $^{19}\text{F}$  NMR (282 MHz,  $\text{CDCl}_3$ ):  $\delta$  82.45 (m,  $^2J_{\text{F,F}} = 150.0$  Hz, 1F, SF), 63.17 (dm,  $^2J_{\text{F,F}} = 150.0$  Hz,  $^3J_{\text{F,H}} = 1.9$  Hz, 4F, SF<sub>4</sub>).

(*E*)-1-(Pentafluoro- $\lambda^6$ -sulfanyl)penta-1,4-dien-3-yl (*tert*-butoxycarbonyl)-glycinate (**4i**).  $^1\text{H}$  NMR

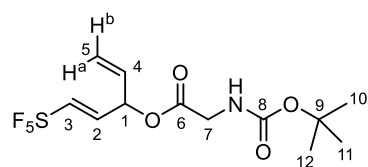

(300 MHz,  $\text{CDCl}_3$ ):  $\delta$  6.67 (dq,  $^3J_{\text{H,H}} = 14.7$  Hz,  $^3J_{\text{F,H}} = 6.2$  Hz,  $^4J_{\text{H,H}} = 1.0$  Hz, 1H, 3-CH) 6.47 (dd,  $^3J_{\text{H,H}} = 14.7$  Hz,  $^3J_{\text{H,H}} = 5.0$  Hz, 1H, 2-CH), 5.95–5.86 (m, 2H, 5-CH<sub>2</sub>) 5.80 (ddd,  $^3J_{\text{H,H}} = 15.0$ ,  $^3J_{\text{H,H}} = 10.5$ ,  $^3J_{\text{H,H}} = 5.6$  Hz, 1H, 4-CH), 5.08 (m, 1H, 1-CH), 3.97 (d, 2H,  $^3J_{\text{H,H}} = 5.8$  Hz, 7-CH<sub>2</sub>), 1.45 (s,  $^3J_{\text{H,H}} = 1.5$  Hz, 9H, 10-/11-/12-CH<sub>3</sub>);  $^{13}\text{C}\{^1\text{H}\}$  NMR (75 MHz,  $\text{CDCl}_3$ ):  $\delta$  169.2 (C-6), 155.9 (C-8), 142.3 (qu,  $^2J_{\text{C,F}} = 20.0$  Hz, C-3), 134.8 (qu,  $^3J_{\text{C,F}} = 7.2$  Hz, C-2), 132.2 (C-4), 120.7 (C-5), 80.4 (C-9), 72.4 (C-7), 42.6 (C-1), 28.4 (C-10/-11/-12);  $^{19}\text{F}$  NMR (282 MHz,  $\text{CDCl}_3$ ):  $\delta$  82.06 (m,  $^2J_{\text{F,F}} = 151.1$  Hz, 1F, SF), 63.19 (dm,  $^2J_{\text{F,F}} = 151.1$  Hz, 4F, SF<sub>4</sub>).

1-[4-(Pentafluoro- $\lambda^6$ -sulfanyl)phenyl]prop-2-en-1-ol (**8**).  $^1\text{H}$  NMR (300 MHz,  $\text{CDCl}_3$ ):  $\delta$  7.75

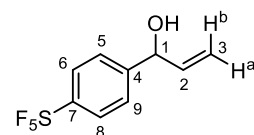

(dqu,  $^3J_{\text{H,H}} = 8.2$  Hz,  $^3J_{\text{H,F}} = 2.0$  Hz 1H, 6-/8-CH), 7.46 (d,  $^3J_{\text{H,H}} = 8.2$  Hz, 1H, 5-/9-CH), 5.97 (ddd,  $^3J_{\text{H,H}} = 17.0$  Hz,  $^3J_{\text{H,H}} = 10.2$  Hz,  $^3J_{\text{H,H}} = 6.2$  Hz, 1H, 2-CH), 5.37 (dd,  $^3J_{\text{H,H}} = 17.0$  Hz,  $^2J_{\text{H,H}} = 1.2$  Hz, 1H, 3-CH<sub>b</sub>), 5.25 (dd,  $^3J_{\text{H,H}} = 10.2$  Hz,  $^2J_{\text{H,H}} = 1.2$  Hz, 1H, 3-CH<sub>a</sub>), 5.23 (d,  $^3J_{\text{H,H}} = 6.2$  Hz, 1H, 1-CH), 2.34 (s, 1H, -OH);  $^{13}\text{C}\{^1\text{H}\}$  NMR (75 MHz,  $\text{CDCl}_3$ ):  $\delta$  153.2 (dqu,  $^3J_{\text{C,F}} = 1.2$  Hz,  $^3J_{\text{C,F}} = 17.2$  Hz, C-7), 146.1 (C-4), 139.3 (C-2), 126.4 (C-5/-9), 126.1 (dqu,  $^4J_{\text{C,F}} = 4.6$  Hz, C-6/-8), 116.6 (C-3), 74.6 (C-1);  $^{19}\text{F}$  NMR (282 MHz,  $\text{CDCl}_3$ ):  $\delta$  84.60 (mp,  $^2J_{\text{F,F}} = 149.9$  Hz, 1F, SF), 62.94 (d,  $^2J_{\text{F,F}} = 149.9$  Hz, 4F, SF<sub>4</sub>).

1-[4-(Pentafluoro- $\lambda^6$ -sulfanyl)phenyl]allyl (*tert*-butoxycarbonyl)glycinate (**6**).  $^1\text{H}$  NMR

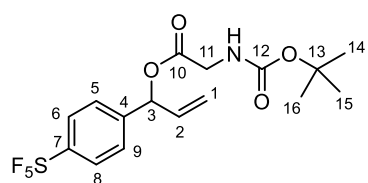

(300 MHz,  $\text{CDCl}_3$ ):  $\delta$  7.75 (dd,  $^3J_{\text{H,H}} = 8.6$  Hz,  $^4J_{\text{H,F}} = 2.0$  Hz, 2H, 6-/8-CH), 7.45 (d,  $^3J_{\text{H,H}} = 8.6$  Hz, 2H, 5-/9-CH), 6.32 (d,  $^3J_{\text{H,H}} = 6.1$  Hz, 1H, 3-CH), 5.96 (ddd,  $^3J_{\text{H,H}} = 16.8$  Hz,  $^3J_{\text{H,H}} = 10.4$  Hz,  $^3J_{\text{H,H}} = 6.1$  Hz, 1H, 2-CH), 5.35 (m, 2H, 1-CH<sub>2</sub>), 5.02 (bs, 1H, NH), 3.98 (m, 2H, 11-CH<sub>2</sub>), 1.44 (s, 9H, 14 to 16-CH<sub>3</sub>);  $^{13}\text{C}\{^1\text{H}\}$  NMR (75 MHz,  $\text{CDCl}_3$ ):  $\delta$  169.4 (C-12), 155.7 (C-10), 153.6 (qu,  $^2J_{\text{C,F}} = 17.6$  Hz, C-7), 142.1 (C-4), 134.7 (C-5/-9), 127.3 (C-2), 126.4 (dqu,  $^3J_{\text{C,F}} = 4.7$  Hz, C-6/-8), 118.7 (C-1), 80.2 (C-13), 76.1 (C-3), 42.6 (C-11), 28.3 (C-14-16);  $^{19}\text{F}$  NMR (282 MHz,  $\text{CDCl}_3$ ):  $\delta$  85.24–82.94 (m,  $^2J_{\text{F,F}} = 150.0$ , 1F, SF), 62.80 (d,  $^2J_{\text{F,F}} = 150.0$ , 4F, SF<sub>4</sub>).

(*E*)-2-[(*tert*-Butoxycarbonyl)amino]-5-[4-(pentafluoro- $\lambda^6$ -sulfanyl)phenyl]pent-4-enoic acid (**7**).

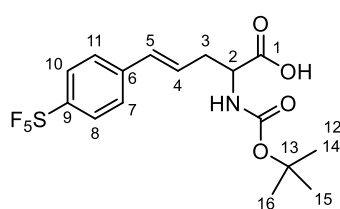

$^1\text{H}$  NMR (300 MHz,  $\text{CDCl}_3$ ):  $\delta$  8.77 (brs, 1H, COOH), 7.66 (d,  $^3J_{\text{H,H}} = 8.5$  Hz, 2H, 8-/10-CH), 7.38 (d,  $^3J_{\text{H,H}} = 8.5$  Hz, 2H, 7-/11-CH), 6.48 (d,  $^3J_{\text{H,H}} = 15.8$  Hz, 1H, 5-CH), 6.23 (td,  $^3J_{\text{H,H}} = 15.7$  Hz,  $^3J_{\text{H,H}} = 7.5$  Hz, 1H, 4-CH), 4.50 (q,  $^3J_{\text{H,H}} = 6.4$  Hz, 1H, 2-CH), 3.57 (s, 1H, NH), 2.90 – 2.60 (dm, 2H, 3-CH<sub>2</sub>), 1.42 (s, 9H, 14-/15-/16-CH<sub>3</sub>);  $^{13}\text{C}\{^1\text{H}\}$  NMR (75 MHz,  $\text{CDCl}_3$ ):  $\delta$  175.9 (C-1) 155.4 (C-12), 152.6 (qu,  $^2J_{\text{C,F}} = 17.0$  Hz, C-9), 140.0 (C-6), 132.1 (C-5), 127.5 (C-7/-11), 126.2 (qu, C-8/-10), 126.1 (C-4), 80.5 (C-13), 52.9 (C-2), 36.0 (C-3), 28.2 (C-14/-15/-16);  $^{19}\text{F}$  NMR (282 MHz,  $\text{CDCl}_3$ ):  $\delta$  84.37 (mq,  $^2J_{\text{F,F}} = 147.0$  Hz, 1F, SF), 62.47 (dm,  $^2J_{\text{F,F}} = 147.0$  Hz, 4F, SF<sub>4</sub>).

Methyl (*E*)-5-[4-(pentafluoro- $\lambda^6$ -sulfanyl)phenyl]pent-4-enoate (**9**).  $^1\text{H}$  NMR (300 MHz,  $\text{CDCl}_3$ ):

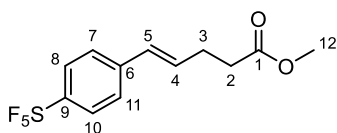

$\delta$  7.69–7.63 (dqu,  $^3J_{\text{H,H}} = 8.6$  Hz,  $^3J_{\text{H,F}} = 1.8$  Hz, 2H, 8-/10-CH), 7.38 (d,  $^3J_{\text{H,H}} = 8.6$  Hz, 2H, 7-/11-CH), 6.44 (d,  $^3J_{\text{H,H}} = 16.0$  Hz, 1H, 5-CH), 6.31 (dt,  $^3J_{\text{H,H}} = 16.0$  Hz,  $^3J_{\text{H,H}} = 6.2$  Hz, 1H, 4-CH), 3.69 (s, 3H, 12-CH<sub>3</sub>), 2.54 (m, 4H, 3-/2-CH<sub>2</sub>);  $^{13}\text{C}\{^1\text{H}\}$  NMR (75 MHz,  $\text{CDCl}_3$ ):  $\delta$  173.1 (C-1), 152.3 (qu,  $^2J_{\text{C,F}} = 17.1$  Hz, C-9), 140.6 (C-6), 132.1 (C-11/-7), 129.2 (C-3), 126.1 (qu,  $^3J_{\text{C,F}} = 10.5$  Hz, C-10/-8), 126.0 (C-2), 51.6 (C-12), 33.3 (C-3), 28.1 (C-4);  $^{19}\text{F}$  NMR (282 MHz,  $\text{CDCl}_3$ ):  $\delta$  84.58 (mq,  $^2J_{\text{F,F}} = 149.6$  Hz, 1F, SF), 62.55 (dm,  $^2J_{\text{F,F}} = 149.6$  Hz, 4F, SF<sub>4</sub>).

Methyl (*4E,6E*)-7-(pentafluoro- $\lambda^6$ -sulfanyl)hepta-4,6-dienoate (**10g**).  $^1\text{H}$  NMR (300 MHz,  $\text{CDCl}_3$ ):  $\delta$  6.83 (dd,  $^3J_{\text{H,H}} = 14.4$ ,  $^3J_{\text{H,H}} = 10.0$  Hz, 1H, 6-CH), 6.49

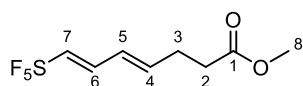

(dqu, 1H,  $^3J_{\text{H,H}} = 14.4$ ,  $^3J_{\text{H,F}} = 6.7$  Hz, 1H, 7-CH), 6.20 – 5.95 (m, 2H, 4-/5-CH), 3.68 (s, 3H, 8-CH<sub>3</sub>), 2.60 – 2.40 (m, 4H, 2-/3-CH<sub>2</sub>);  $^{13}\text{C}\{^1\text{H}\}$  NMR (75 MHz,  $\text{CDCl}_3$ ):  $\delta$  172.8 (1-C) 142.3 (qu,  $^4J_{\text{C,F}} = 2.2$  Hz, C-5) 140.2 (qu,  $^2J_{\text{C,F}} = 20.1$  Hz, C-7), 136.2 (qu,  $^3J_{\text{C,F}} = 7.5$  Hz, C-6), 125.7 (C-4), 51.7 (8-CH<sub>3</sub>), 32.8 (C-2), 28.0 (C-3);  $^{19}\text{F}$  NMR (282 MHz,  $\text{CDCl}_3$ ):  $\delta$  85.64 – 83.47 (m,  $^2J_{\text{F,F}} = 150.8$  Hz, 1F, SF), 64.09 (dm,  $^2J_{\text{F,F}} = 150.8$ , 4F, SF<sub>4</sub>).

Methyl (*4E,6E*)-2-methyl-7-(pentafluoro- $\lambda^6$ -sulfanyl)hepta-4,6-dienoate (**10h**).  $^1\text{H}$  NMR

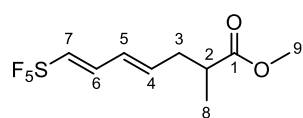

(400 MHz,  $\text{CDCl}_3$ ):  $\delta$  6.83 (dd,  $^3J_{\text{H,H}} = 14.4$ ,  $^3J_{\text{H,H}} = 9.7$  Hz, 1H, 5-CH). 6.48 (md  $^3J_{\text{H,H}} = 14.1$  Hz, 1H, 7-CH), 6.10 – 5.95 (m, 2H, 6-CH, 4-CH), 3.69 (s, 3H, 9-CH<sub>3</sub>), 2.58 (dd,  $^2J_{\text{H,H}} = 13.4$ ,  $^3J_{\text{H,H}} = 6.6$  Hz, 1H, 3-CH<sub>2a</sub>), 2.52 (dq,  $^3J_{\text{H,H}} = 6.7$  Hz,  $^3J_{\text{H,H}} = 6.6$  Hz, 1H, 2-CH), 2.31 (dt,  $^2J_{\text{H,H}} = 13.4$ ,  $^3J_{\text{H,H}} = 6.6$  Hz, 1H, 3-CH<sub>2a</sub>), 1.18 (d,  $^3J_{\text{H,H}} = 6.7$  Hz, 3H, 8-CH<sub>3</sub>);  $^{13}\text{C}\{^1\text{H}\}$  NMR (101 MHz,  $\text{CDCl}_3$ ):  $\delta$  175.9 (C-1), 141.2 (C-5), 140.2 (qu,  $^2J_{\text{C,F}} = 20.5$  Hz, C-7), 136.1 (qu,  $^3J_{\text{C,F}} = 7.5$  Hz, C-6), 126.7 (C-4), 51.8 (C-2), 38.9 (C-3), 36.7 (C-9), 16.8 (C-8);  $^{19}\text{F}$  NMR (282 MHz,  $\text{CDCl}_3$ ):  $\delta$  84.51 (qu,  $^2J_{\text{F,F}} = 150.8$  Hz, 1F, SF), 64.11 (dm,  $^2J_{\text{F,F}} = 150.8$ , 4F, SF<sub>4</sub>).

*Octyl 2,2-difluoro-2-(pentafluoro- $\lambda^6$ -sulfanyl)acetate (11)*.  $^1\text{H}$  NMR (300 MHz,  $\text{CDCl}_3$ ):  $\delta$  4.38

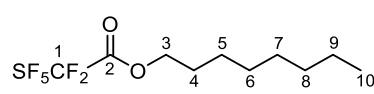 (t,  $^3J_{\text{H,H}} = 6.7$  Hz, 2H, H-3), 1.74 (dt,  $^3J_{\text{H,H}} = 7.9$ ,  $^3J_{\text{H,H}} = 6.5$  Hz, 2H, H-4), 1.45 – 1.24 (m, 10H, H-5 – H-9), 0.95 – 0.84 (m, 3H, H-10);  $^{13}\text{C}\{^1\text{H}\}$  NMR (75 MHz,  $\text{CDCl}_3$ ):  $\delta$  69.2 (C-3), 31.7 (C-4), 29.05 (C-5), 28.96 (C-6), 28.0 (C-7), 25.4 (C-8), 22.6 (C-9), 14.1 (C-10). The signals for the  $\text{CF}_2$  (C1) and CO (C2) carbon atoms were not observed, as an insufficient number of transients were recorded and these signals are expected to be highly coupled.  $^{19}\text{F}$  NMR (282 MHz,  $\text{CDCl}_3$ ):  $\delta$  65.99 (qum,  $^2J_{\text{F,F}} = 148.0$  Hz, 1F, SF), 40.95 (dtm,  $^2J_{\text{F,F}} = 148.0$ ,  $^3J_{\text{F,F}} = 12.0$  Hz, 4F, SF<sub>4</sub>), -91.40 (qud,  $^3J_{\text{F,F}} = 12.0$ ,  $^3J_{\text{F,F}} = 4.3$  Hz, 2F, CF<sub>2</sub>).

*1,1-Difluoro-1-(pentafluoro- $\lambda^6$ -sulfanyl)dodec-3-yn-2-one (12)*.  $^1\text{H}$  NMR (300 MHz,  $\text{CDCl}_3$ ):  $\delta$

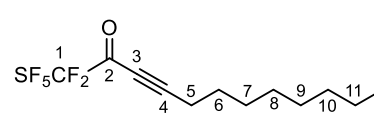 2.51 (t,  $^3J_{\text{H,H}} = 7.0$  Hz, 2H, H-5), 1.65 (q,  $^3J_{\text{H,H}} = 7.0$  Hz, 2 H, H-6), 1.48 – 1.37 (m, 2H, H-7), 1.34 – 1.19 (m, 8H, H-8 – H-11), 0.89 (t,  $^3J_{\text{H,H}} = 7.0$  Hz, 3H, H-12).  $^{13}\text{C}\{^1\text{H}\}$  NMR (75 MHz,  $\text{CDCl}_3$ ):  $\delta$  119.1 (tm, C-1), 106.4 (C-4), 76.3 – 76.0 (m, C-3), 31.8 (C-5), 29.1 (C-6), 28.9 (C-7), 28.7 (C-8), 27.2 (C-9), 22.6 (C-10), 19.5 (C-11), 14.0 (C-12). The signal for the CO (C-2) carbon atom was not observed, as an insufficient number of transients were recorded and this signal is expected to be highly coupled, which would further reduce its intensity.  $^{19}\text{F}$  NMR (282 MHz,  $\text{CDCl}_3$ ):  $\delta$  65.95 (qum,  $^2J_{\text{F,F}} = 147.1$  Hz, 1F, SF<sub>4</sub>), 43.88 (dtm,  $^2J_{\text{F,F}} = 147.1$ ,  $^3J_{\text{F,F}} = 12.0$  Hz, 4F, SF<sub>4</sub>), -91.52 (qum,  $^3J_{\text{F,F}} = 12.3$ ,  $^3J_{\text{F,F}} = 4.1$  Hz, 2F, CF<sub>2</sub>).

*1,1-Difluoro-1-(pentafluoro- $\lambda^6$ -sulfanyl)dodec-3-yn-2-ol (13)*.  $^1\text{H}$  NMR (300 MHz,  $\text{CDCl}_3$ ):  $\delta$

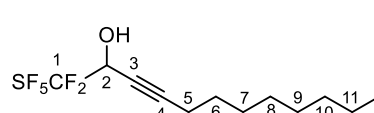 4.88 (t,  $^3J_{\text{H,F}} = 9.1$  Hz, 1H, H-2), 2.69 (bs, 1H, OH), 2.25 (td,  $^3J_{\text{H,H}} = 7.0$ ,  $^5J_{\text{H,H}} = 2.1$  Hz, 2H, H-5), 1.53 (qu,  $^3J_{\text{H,H}} = 7.0$  Hz, 2 H, H-6), 1.40 – 1.30 (m, 2H, H-7), 1.28 (m, 8H, H-8 – H-11), 0.89 (t,  $^3J_{\text{H,H}} = 7.0$  Hz, 3H, H-12).  $^{13}\text{C}\{^1\text{H}\}$  NMR (75 MHz,  $\text{CDCl}_3$ ):  $\delta$  127.2 (tm,  $^1J_{\text{C,F}} = 304.4$  Hz, C-1), 90.6 (C-3), 71.8 (C-4), 64.2 (t,  $^2J_{\text{C,F}} = 25.6$  Hz, C-2), 31.9 (C-5), 29.2 (C-6), 29.1 (C-7), 28.8 (C-8), 28.1 (C-9), 22.7 (C-10), 18.6 (C-11), 14.1 (C-12);  $^{19}\text{F}$  NMR (282 MHz,  $\text{CDCl}_3$ ):  $\delta$  68.73 (qum,  $^2J_{\text{F,F}} = 145.6$  Hz, 1F, SF), 41.80 (dtm,  $^2J_{\text{F,F}} = 146.7$ ,  $^3J_{\text{F,F}} = 15.1$  Hz, 4F, SF<sub>4</sub>), AB spin system ( $J_{\text{AB}} = 188.3$  Hz), -90.20 (bm, 1F, F-1) and -92.60 (bs, 1F, F-1');

*(Z)-1,1-Difluoro-1-(pentafluoro- $\lambda^6$ -sulfanyl)dodec-3-en-2-ol (14)*.  $^1\text{H}$  NMR (300 MHz,  $\text{CDCl}_3$ ):  $\delta$

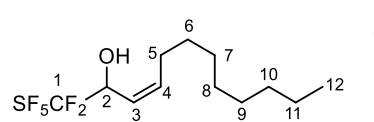 5.89 (dt,  $^3J_{\text{H,H}} = 10.6$ ,  $^3J_{\text{H,H}} = 7.6$  Hz, 1H, H-3), 5.51 (t,  $^3J_{\text{H,H}} = 9.8$  Hz, 1H, H-4), 4.98 (ddd,  $J = 14.8$ ,  $J = 8.6$ ,  $J = 6.1$  Hz, 1H, H-2), 2.41 (bs, 1H, OH), 2.13 (q,  $^3J_{\text{H,H}} = 7.3$  Hz, 2H, H-5), 1.41 (qu,  $^3J_{\text{H,H}} = 7.3$  Hz, 1H, H-6), 1.28 (m, 10H, H-7 – H-11), 0.88 (t,  $^3J_{\text{H,H}} = 7.0$  Hz, 3H, H-12);  $^{13}\text{C}\{^1\text{H}\}$  NMR (75 MHz,  $\text{CDCl}_3$ ):  $\delta$  140.0 (C-3), 129.0 (t,  $^1J_{\text{C,F}} = 304.0$  Hz, C-1), 121.4 (C-4), 68.3 (t,  $^2J_{\text{C,F}} = 23.4$  Hz, C-2), 31.9 (C-5), 29.4 (C-6), 29.24 (C-7), 29.22 (C-8), 29.1 (C-9), 28.0 (C-10), 22.7 (C-11), 14.1 (C-12);  $^{19}\text{F}$  NMR (282 MHz,  $\text{CDCl}_3$ ):  $\delta$  69.53 (qu,  $^2J_{\text{F,F}} = 145.5$  Hz, 1F, SF), 40.41

(dtm,  $^2J_{F,F} = 145.5$ ,  $^3J_{F,F} = 15.6$  Hz, 4F, SF<sub>4</sub>), AB spin system ( $J_{AB} = 188.3$  Hz), -89.06 (t,  $^3J_{F,F} = 14.9$  Hz, 1F, F-1) and -94.51 (bs, 1F, F-1').

**(Z)-1,1-Difluoro-1-(pentafluoro- $\lambda^6$ -sulfanyl)dodec-3-en-2-yl methanesulfonate (15).** <sup>1</sup>H NMR

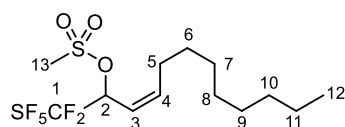

(300 MHz, CDCl<sub>3</sub>):  $\delta$  6.09 (dt,  $^3J_{H,H} = 11.0$ ,  $^3J_{H,H} = 7.6$  Hz, 1H, H-4), 5.95 – 5.80 (m, 1H, H-3), 5.55 (t,  $^3J_{H,H} = 10.3$  Hz, 1H, H-2), 3.07 (s, 3H, H-13), 2.22 (qt,  $^3J_{H,H} = 14.8$ ,  $^3J_{H,H} = 7.7$  Hz, 2H, H-5),

1.47 – 1.38 (m, 2H, H-6), 1.36 – 1.20 (m, 10H, H-7 – H-11), 0.89 (t,  $^3J_{H,H} = 7.0$  Hz, 3H, H-12); <sup>13</sup>C{<sup>1</sup>H} NMR (75 MHz, CDCl<sub>3</sub>):  $\delta$  143.7 (C-3), 126.4 (m, C-1), 117.3 (C-4), 74.0 (ddm,  $^2J_{C,F} = 28.5$ ,  $^2J_{C,F} = 22.3$  Hz, C-2), 39.9 (C-13), 31.9 (C-5), 29.4 (C-6), 29.3 (C-7), 29.2 (C-8), 28.8 (C-9), 28.2 (C-10), 22.7 (C-11), 14.1 (C-12); <sup>19</sup>F NMR (282 MHz, CDCl<sub>3</sub>):  $\delta$  67.91 (qut,  $^2J_{F,F} = 148.0$ ,  $^3J_{F,F} = 5.0$  Hz, 1F, SF), 40.98 (dtm,  $^2J_{F,F} = 146.6$ ,  $^3J_{F,F} = 15.2$  Hz, 4F, SF<sub>4</sub>), AB spin system ( $J_{AB} = 195.7$  Hz): -88.24 (qud,  $^3J_{F,F} = 14.2$ ,  $^3J_{F,H} = 7.9$  Hz, 1F, F1) and -91.31 (qud,  $^3J_{F,F} = 14.9$  Hz, 1F, F1').

**(E)-1,1-difluorododeca-1,3-diene (17a).** <sup>1</sup>H NMR (300 MHz, CDCl<sub>3</sub>):  $\delta$  5.60 (dt,  $^3J_{H,H} = 15.4$ ,

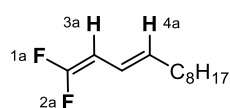

$^3J_{H,H} = 7.00$  Hz, 1H, H-4a), 4.90 (ddd,  $^3J_{H,F} = 24.8$ ,  $^3J_{H,H} = 10.7$  Hz,  $J = 1.8$  Hz, 1H, H-3a); <sup>19</sup>F NMR (282 MHz, CDCl<sub>3</sub>):  $\delta$  -87.97 (dd,  $^2J_{F,F} = 35.3$ ,  $^3J_{F,H} = 24.7$  Hz, 1F, F-2a), -90.70 (d,  $^2J_{F,F} = 35.3$  Hz, 1F, F-1a).

**(Z)-1,1-difluorododeca-1,3-diene (17b).** <sup>1</sup>H NMR (300 MHz, CDCl<sub>3</sub>):  $\delta$  5.45 (qd,  $^3J_{H,H} = 8.7$ ,

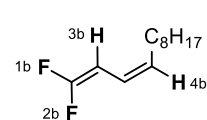

$^4J_{H,H} = 1.5$  Hz, 1H, H-4b), 5.15 (dddd,  $^3J_{H,F} = 24.2$ ,  $J = 11.4$  Hz,  $J = 2.2$ ,  $J = 1.8$  Hz, 1H, H-3b); <sup>19</sup>F NMR (282 MHz, CDCl<sub>3</sub>):  $\delta$  -86.84 (dd,  $^2J_{F,F} = 29.4$ ,  $^3J_{F,H} = 24.2$  Hz, 1F, F-2b), -87.75 (d,  $^2J_{F,F} = 29.4$ , 1F, F-1b).

**(E)-1,1,1-Trifluorododec-2-ene (18).** <sup>19</sup>F NMR (282 MHz, CDCl<sub>3</sub>):  $\delta$  -63.17 (d,  $^3J_{F,H} = 6.9$  Hz, 3F).

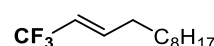

**1-Bromo-5,5,5-trifluoro-4-hydroxypentan-2-one (24).** <sup>1</sup>H NMR (300 MHz, CDCl<sub>3</sub>):  $\delta$  4.55 (m,

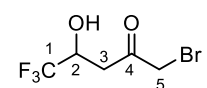

1H, H-2), 4.16 (s, 2H, H-5), 3.44 (d,  $^3J_{H,H} = 5.0$  Hz, 1H, OH), AB spin system: 3.04 (dd,  $^2J_{H,H} = 17.7$ ,  $^3J_{H,H} = 9.5$  Hz, 1H, H-3) and 2.90 (dd,  $^2J_{H,H} = 17.8$ ,  $^3J_{H,H} = 2.7$  Hz, 1H, H-3'); <sup>13</sup>C{<sup>1</sup>H} NMR (75 MHz, CDCl<sub>3</sub>):  $\delta$  200.2 (C-4), 124.4 (q,  $^1J_{C,F} = 280.8$  Hz, C-1), 66.4 (q,  $^2J_{C,F} = 32.7$  Hz, C-2), 48.4 (C-5), 39.7 (C-3); <sup>19</sup>F NMR (282 MHz, CDCl<sub>3</sub>):  $\delta$  -

79.67 (d,  $^3J_{F,H} = 6.7$  Hz, 3F, CF<sub>3</sub>).

**(E)-1-Bromo-5,5,5-trifluoropent-3-en-2-ol (20).** <sup>1</sup>H NMR (300 MHz, CDCl<sub>3</sub>):  $\delta$  6.32 (ddq,  $^3J_{H,H} =$

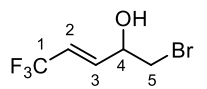

15.6,  $^3J_{H,H} = 4.1$ ,  $^4J_{H,F} = 2.0$  Hz, 1H, H-3), 6.00 (dq,  $^3J_{H,H} = 14.7$ ,  $^3J_{H,F} = 6.4$ ,  $^4J_{H,H} = 1.9$  Hz, 1H, H-2), 4.46 (bs, 1H, H-4), AB spin system: 3.64 (dd,  $^2J_{H,H} = 11.3$ ,  $^4J_{H,H} = 3.9$  Hz, 1H, H-5), 3.47 (dd,  $^3J_{H,H} = 11.3$ ,  $^4J_{H,H} = 6.9$  Hz, 1H, H-5'), 2.44 (d,  $^3J_{H,H} = 4.9$  Hz, 1H, OH); <sup>13</sup>C{<sup>1</sup>H} NMR (75 MHz, CDCl<sub>3</sub>):  $\delta$  137.5 (q,  $^3J_{C,F} = 6.3$  Hz, C-3), 122.9 (q,  $^1J_{C,F}$

= 275.0 Hz, C-1), 120.8 (q,  $^2J_{C,F} = 34.4$  Hz, C-2), 69.8 (C-4), 48.4 (C-5);  $^{19}\text{F}$  NMR (282 MHz,  $\text{CDCl}_3$ ):  $\delta$  -64.46 (dt,  $^3J_{F,H} = 6.2$ ,  $^4J_{F,H} = 2.1$  Hz, 3F,  $\text{CF}_3$ ).

**Methyl (E)-6-bromo-3-(trifluoromethyl)hex-4-enoate (21).**  $^1\text{H}$  NMR (500 MHz,  $\text{CDCl}_3$ ):  $\delta$  5.93 (dt,  $^3J_{H,H} = 15.3$ ,  $^3J_{H,H} = 6.7$  Hz, 1H, H-5), 5.66 (ddt,  $^3J_{H,H} = 15.3$ ,  $^3J_{H,H} = 8.7$ ,  $^4J_{H,H} = 1.3$  Hz, 1H, H-4), 4.03 (ddd,  $^3J_{H,H} = 6.8$ ,  $J_{H,H} = 2.3$ ,  $^4J_{H,H} = 1.3$  Hz, 2H, H-6), 3.71 (s, 3H, H-8), 3.40 (dq,  $^3J_{H,H} = 13.3$ ,  $^3J_{H,F} = 8.9$ ,  $J_{H,H} = 4.5$  Hz, 1H, H-3), 2.76 (dd,  $^2J_{H,H} = 16.0$ ,  $^3J_{H,H} = 4.4$  Hz, 1H, H-2), 2.52 (dd,  $^2J_{H,H} = 16.0$ ,  $^3J_{H,H} = 9.8$  Hz, 1H, H-2');  $^{13}\text{C}\{^1\text{H}\}$  NMR (126 MHz,  $\text{CDCl}_3$ ):  $\delta$  170.3 (C-1), 132.9 (C-5), 128.6-128.1 (m, C-7), 126.0 (q,  $^3J_{C,F} = 2.6$  Hz, C-4), 52.1 (C-8), 43.6 (C-6), 43.3 (q,  $^2J_{C,F} = 28.3$  Hz, C-3), 33.3 (q,  $^3J_{C,F} = 2.4$  Hz, C-2);  $^{19}\text{F}$  NMR (282 MHz,  $\text{CDCl}_3$ ):  $\delta$  -71.87 (d,  $^3J_{F,H} = 8.7$  Hz, 3F,  $\text{CF}_3$ ).

**(E)-1,1,1-Trifluorododec-2-en-4-yl-(tert-butoxycarbonyl)glycinate (27).**  $^1\text{H}$  NMR (400 MHz,  $\text{CDCl}_3$ ):  $\delta$  6.38 (ddq,  $^3J_{H,H} = 15.8$ ,  $^3J_{H,H} = 4.3$ ,  $^4J_{H,F} = 2.0$  Hz, 1H, H-3), 5.99 (dq,  $^3J_{H,H} = 16.0$ ,  $^3J_{H,F} = 5.5$  Hz, 1H, H-2), 5.68 – 5.61 (m, 1H, H-4), 4.00 (d,  $^3J_{H,H} = 5.9$  Hz, 2H, H-7), 5.03 (bs, 1H, NH), 3.67 (dd,  $^3J_{H,H} = 5.5$ ,  $^4J_{H,H} = 2.7$  Hz, 2H, H-5), 1.46 (s, 9H, H-10);  $^{13}\text{C}\{^1\text{H}\}$  NMR (101 MHz,  $\text{CDCl}_3$ ):  $\delta$  169.2 (C-8), 155.7 (C-6), 133.7 (q,  $^3J_{C,F} = 6.4$  Hz, C-3), 122.4 (q,  $^1J_{C,F} = 269.8$  Hz, C-1), 122.3 (q,  $^2J_{C,F} = 34.4$  Hz, C-2), 80.4 (C-9), 71.5 (C-4), 44.0 (C-5), 42.4 (C-7), 28.3 (C-10);  $^{19}\text{F}$  NMR (282 MHz,  $\text{CDCl}_3$ ):  $\delta$  -65.27 (dt,  $^3J_{F,H} = 6.3$ ,  $^4J_{F,H} = 2.1$  Hz, 3F,  $\text{CF}_3$ ).

**Methyl (E)-3-[(pentafluoro- $\lambda^6$ -sulfanyl)methyl]hex-4-enoate (29a).**  $^1\text{H}$  NMR (300 MHz,  $\text{CDCl}_3$ ):  $\delta$  5.62 (dq,  $^3J_{H,H} = 15.4$ ,  $^3J_{H,H} = 6.4$ ,  $^4J_{H,H} = 0.8$  Hz, 1H, H-7), 5.33 (dd,  $^3J_{H,H} = 15.3$ ,  $^3J_{H,H} = 8.4$  Hz, 1H, H-6), 3.86 – 3.63 (m, 2H, H-1), 3.67 (s, 3H, H-5), 3.20 (sextet,  $^3J_{H,H} = 6.9$  Hz, 1H, H-2), 2.55 (AB,  $^2J_{H,H} = 15.9$ ,  $^3J_{H,H} = 5.8$  Hz, 1H, H-3'), 2.43 (dd,  $^2J_{H,H} = 15.9$ ,  $^3J_{H,H} = 7.6$  Hz, 1H, H-3), 1.66 (dd,  $^3J_{H,H} = 6.4$ ,  $^4J_{H,H} = 1.5$  Hz, 3H, H-8);  $^{13}\text{C}\{^1\text{H}\}$  NMR (75 MHz,  $\text{CDCl}_3$ ):  $\delta$  171.5 (C-4), 129.6 (C-6), 128.6 (C-7), 75.5 (qu,  $^2J_{C,F} = 11.2$  Hz, C-1), 51.8 (C-5), 38.5 (m, C-3), 36.9 (qu,  $^3J_{C,F} = 3.3$  Hz, C-2), 17.9 (C-8);  $^{19}\text{F}$  NMR (282 MHz,  $\text{CDCl}_3$ ):  $\delta$  84.96 (nonet,  $^2J_{F,F} = 147.6$  Hz, 1F, SF), 66.41 (dtd,  $^2J_{F,F} = 147.7$ ,  $^3J_{F,H} = 8.6$ ,  $J = 2.1$  Hz, 4F,  $\text{SF}_4$ ).

**Methyl syn-(E)-2-methyl-3-[(pentafluoro- $\lambda^6$ -sulfanyl)methyl]hex-4-enoates (syn-29b).**  $^1\text{H}$  NMR (600 MHz,  $\text{CDCl}_3$ ):  $\delta$  5.60 (dq,  $^3J_{H,H} = 15.2$ ,  $^3J_{H,H} = 6.5$  Hz, 1H, H-8), 5.31 (ddd,  $^3J_{H,H} = 15.2$ ,  $^3J_{H,H} = 9.2$ ,  $^4J_{H,H} = 1.9$  Hz, 1H, H-7), 3.74 (m, 2H, H-1), 3.69 (s, 3H, H-6), 2.89 (tt,  $^3J_{H,H} = 8.8$  Hz,  $^3J_{H_2-H_3} = 4.6$  Hz, 1H, H-2), 2.65 (qd,  $^3J_{H,H} = 7.1$ ,  $^3J_{H_2-H_3} = 4.6$  Hz, 1H, H-3), 1.69 (dd,  $^3J_{H,H} = 6.5$ ,  $^4J_{H,H} = 1.7$  Hz, 3H, H-9), 1.15 (d,  $^3J_{H,H} = 7.1$  Hz, 3H, H-4);  $^{13}\text{C}\{^1\text{H}\}$  NMR (151 MHz,  $\text{CDCl}_3$ ):  $\delta$  174.3 (C-5), 129.9 (C-8), 127.9 (C-7), 75.0 (quint,  $^2J_{C,F} = 11.6$  Hz, C-1), 51.7 (C-6), 43.3 (quint,  $^3J_{C,F} = 3.3$  Hz, C-2), 42.9 (C-3), 17.95 (C-9), 14.6 (C-4);  $^{19}\text{F}$  NMR (282 MHz,  $\text{CDCl}_3$ ):  $\delta$  85.33 (nonet,  $^2J_{F,F} = 144.0$  Hz, 1F, SF), 66.40 (dtd,  $^2J_{F,F} = 144.0$ ,  $^3J_{F,H} = 8.5$ ,  $J = 2.0$  Hz, 4F,  $\text{SF}_4$ ).

*Methyl anti-(E)-2-methyl-3-[(pentafluoro- $\lambda^6$ -sulfanyl)methyl]hex-4-enoates (anti-29b).*  $^1\text{H}$  NMR

(600 MHz,  $\text{CDCl}_3$ ):  $\delta$  5.61 (dq,  $^3J_{\text{H,H}} = 15.2$ ,  $^3J_{\text{H,H}} = 6.5$  Hz, 1H, H-8), 5.24 (ddd,  $^3J_{\text{H,H}} = 15.2$ ,  $^3J_{\text{H,H}} = 9.5$ ,  $^4J_{\text{H,H}} = 1.8$  Hz, 1H, H-7), 3.94 (dpd,  $^2J_{\text{H,H}} = 16.8$ ,  $^3J_{\text{H,F}} = 8.5$ ,  $^3J_{\text{H,H}} = 4.2$  Hz, 2H, H-1), 3.71 (s, 3H, H-6), 3.07 (dq,  $^3J_{\text{H}_2\text{-H}_3} = 9.0$  Hz,  $^3J_{\text{H,H}} = 6.5$  Hz, 1H, H-3), 2.53 (quint,  $^3J_{\text{H,H}} = 7.1$ , 1H, H-2), 1.69 (dd,  $^3J_{\text{H,H}} = 6.5$ ,  $^4J_{\text{H,H}} = 1.7$  Hz, 3H, H-9), 1.14 (d,  $^3J_{\text{H,H}} = 7.1$  Hz, 3H, H-4);  $^{13}\text{C}\{^1\text{H}\}$  NMR (151 MHz,  $\text{CDCl}_3$ ):  $\delta$  174.8 (C-5), 129.8 (C-8), 128.2 (C-7), 74.7 (quint,  $^2J_{\text{C,F}} = 11.1$  Hz, C-1), 51.9 (C-6), 43.1 (C-3), 42.6 (quint,  $^3J_{\text{C,F}} = 3.1$  Hz, C-2), 17.9 (C-9), 13.9 (C-4);  $^{19}\text{F}$  NMR (282 MHz,  $\text{CDCl}_3$ ):  $\delta$  85.08 (nonet,  $^2J_{\text{F,F}} = 144.0$  Hz, 1F, SF), 66.64 (dtd,  $^2J_{\text{F,F}} = 144.0$ ,  $^3J_{\text{F,H}} = 8.5$ ,  $J = 2.0$  Hz, 4F, SF<sub>4</sub>).

*Methyl (E)-2-ethyl-3-[(pentafluoro- $\lambda^6$ -sulfanyl)methyl]hex-4-enoates (29c).*

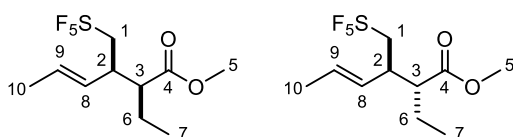

*Major product.*  $^1\text{H}$  NMR (600 MHz,  $\text{CDCl}_3$ ):  $\delta$  5.59 (dq,  $^3J_{\text{H,H}} = 15.4$ ,  $^3J_{\text{H,H}} = 6.3$  Hz, 1H, H-9), 5.33 (ddd,  $^3J_{\text{H,H}} = 15.2$ ,  $^3J_{\text{H,H}} = 9.2$ ,  $^4J_{\text{H,H}} = 1.9$  Hz, 1H, H-8), 3.73 – 3.63 (m, 2H, H-1), 3.68 (s, 3H, H-5), 2.92 (tt,  $^3J_{\text{H}_2\text{-H}_8} = ^3J_{\text{H}_2\text{-H}_3} = 9.1$ ,  $^3J_{\text{H,H}} = 4.8$  Hz, 1H, H-2), 2.41 (dt,  $^3J_{\text{H}_2\text{-H}_3} = 9.3$ ,  $^3J_{\text{H,H}} = 5.4$  Hz, 1H, H-3), 1.69 (dd,  $^3J_{\text{H,H}} = 6.4$ ,  $^4J_{\text{H,H}} = 1.6$  Hz, 3H, H-10), 1.59 (m, 2H, H-6), 0.91 (t,  $^3J_{\text{H,H}} = 7.4$  Hz, 3H, H-7);  $^{13}\text{C}\{^1\text{H}\}$  NMR (151 MHz,  $\text{CDCl}_3$ ):  $\delta$  173.9 (C-4), 129.7 (C-8), 128.1 (C-9), 75.2 (quint,  $^2J_{\text{C,F}} = 11.1$  Hz, C-1), 51.6 (C-5), 50.7 (C-3), 42.0 (quint,  $^3J_{\text{C,F}} = 3.1$  Hz, C-2), 22.8 (C-10), 17.9 (C-6), 12.0 (C-7);  $^{19}\text{F}$  NMR (282 MHz,  $\text{CDCl}_3$ ):  $\delta$  85.30 (quint,  $^2J_{\text{F,F}} = 145.5$  Hz, 1F, SF), 66.48 (dt,  $^2J_{\text{F,F}} = 145.7$ ,  $^3J_{\text{F,H}} = 8.2$  Hz, 4F, SF<sub>4</sub>).

*Minor product.*  $^1\text{H}$  NMR (600 MHz,  $\text{CDCl}_3$ ):  $\delta$  5.59 (dq,  $^3J_{\text{H,H}} = 15.4$ ,  $^3J_{\text{H,H}} = 6.3$  Hz, 1H, H-9), 5.23 (ddd,  $^3J_{\text{H,H}} = 15.2$ ,  $^3J_{\text{H,H}} = 9.3$ ,  $^4J_{\text{H,H}} = 1.8$  Hz, 1H, H-8), 3.92 (dtt,  $^2J_{\text{H,H}} = 21.6$ ,  $^3J_{\text{H,H}} = 8.4$ ,  $^3J_{\text{H,H}} = 4.6$  Hz, 2H, H-1), 3.71 (s, 3H, H-5), 2.97 (qd,  $^3J_{\text{H,H}} = ^3J_{\text{H,H}} = 8.4$ ,  $^3J_{\text{H,H}} = 4.0$  Hz, 1H, H-2), 2.29 (dt,  $^3J_{\text{H,H}} = 7.8$ ,  $^3J_{\text{H,H}} = 6.2$  Hz, 1H, H-3), 1.70 (dd,  $^3J_{\text{H,H}} = 6.4$ ,  $^4J_{\text{H,H}} = 1.6$  Hz, 3H, H-10), 1.48 (dq,  $^2J_{\text{H,H}} = 14.8$ ,  $^3J_{\text{H,H}} = 7.4$ ,  $^3J_{\text{H,H}} = 5.4$  Hz, 2H, H-6), 0.89 (t,  $^3J_{\text{H,H}} = 7.4$  Hz, 3H, H-7);  $^{13}\text{C}\{^1\text{H}\}$  NMR (151 MHz,  $\text{CDCl}_3$ ):  $\delta$  174.5 (C-4), 129.4 (C-8), 129.1 (C-9), 74.8 (quint,  $^2J_{\text{C,F}} = 11.3$  Hz, C-1), 51.7 (C-5), 51.0 (C-3), 42.0 (quint,  $^3J_{\text{C,F}} = 3.1$  Hz, C-2), 23.2 (C-10), 17.9 (C-6), 11.7 (C-7);  $^{19}\text{F}$  NMR (282 MHz,  $\text{CDCl}_3$ ):  $\delta$  85.24 (quint,  $^2J_{\text{F,F}} = 145.9$  Hz, 1F, SF), 66.80 (dt,  $^2J_{\text{F,F}} = 145.9$ ,  $^3J_{\text{F,H}} = 8.2$  Hz, 4F, SF<sub>4</sub>).

*Methyl syn-(E)-3-[(pentafluoro- $\lambda^6$ -sulfanyl)methyl]-2-propylhex-4-enoates (syn-29d).*  $^1\text{H}$  NMR

(600 MHz,  $\text{CDCl}_3$ ):  $\delta$  5.58 (dq,  $^3J_{\text{H,H}} = 15.2$ ,  $^3J_{\text{H,H}} = 6.5$  Hz, 1H, H-10), 5.32 (dm,  $^3J_{\text{H,H}} = 15.2$  Hz, 1H, H-9), 3.74 – 3.62 (m, 2H, H-1), 3.67 (s, 3H, H-5), 2.90 (tt,  $^3J_{\text{H,H}} = 9.1$ ,  $^3J_{\text{H,H}} = ^3J_{\text{H,H}} = 5.1$  Hz, 1H, H-2), 2.50 (td,  $^3J_{\text{H,H}} = 10.0$ ,  $^3J_{\text{H,H}} = 5.2$  Hz, 1H, H-3), 1.69 (dt,  $^3J_{\text{H,H}} = 6.9$ ,  $^4J_{\text{H,H}} = 1.7$  Hz, 3H, H-11), 1.41 – 1.36 (m, 1H, H-6), 1.34 – 1.27 (m, 2H, H-6', H-7), 1.26 – 1.18 (m, 1H, H-7'), 0.91



(t,  $^3J_{H,H} = 7.3$  Hz, 3H, H-8);  $^{13}\text{C}\{^1\text{H}\}$  NMR (151 MHz,  $\text{CDCl}_3$ ):  $\delta$  174.0 (C-4), 129.7 (C-10), 128.2 (C-9), 75.2 (quint,  $^2J_{C,F} = 11.1$  Hz, C-1), 51.6 (C-5), 48.8 (C-3), 42.3 (quint,  $^3J_{C,F} = 3.2$  Hz, C-2), 31.8 (C-11), 20.7 (C-6), 17.95 (C-7), 13.9 (C-8);  $^{19}\text{F}$  NMR (282 MHz,  $\text{CDCl}_3$ ):  $\delta$  85.28 (quint,  $^2J_{F,F} = 145.5$  Hz, 1F, SF), 66.50 (dt,  $^2J_{F,F} = 145.4$ ,  $^3J_{F,H} = 8.5$  Hz, 4F, SF<sub>4</sub>).

*Methyl anti-(E)-3-[(pentafluoro- $\lambda^6$ -sulfanyl)methyl]-2-propylhex-4-enoates (anti-29d).*  $^1\text{H}$  NMR

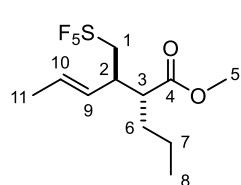

(600 MHz,  $\text{CDCl}_3$ ):  $\delta$  5.58 (dq,  $^3J_{H,H} = 15.2$ ,  $^3J_{H,H} = 6.5$  Hz, 1H, H-10), 5.22

(ddd,  $^3J_{H,H} = 15.2$ ,  $^3J_{H,H} = 9.2$ ,  $^4J_{H,H} = 1.8$  Hz, 1H, H-9), 3.91 (dq,  $^2J_{H,H} = 21.3$ ,  $^3J_{H,F} = 8.4$ ,  $^3J_{H1-H2} = 4.1$  Hz, 2H, H-1), 3.69 (s, 3H, H-5), 2.96 (ddt,

$^3J_{H,H} = 12.3$ ,  $^3J_{H,H} = 8.0$ ,  $^3J_{H1-H2} = 4.3$  Hz, 1H, H-2), 2.38 (ddd,  $^3J_{H,H} = 10.6$ ,

$^3J_{H,H} = 7.6$ ,  $^3J_{H,H} = 4.2$  Hz, 1H, H-3), 1.70 (td,  $^3J_{H,H} = 6.9$ ,  $^4J_{H,H} = 1.7$  Hz, 3H, H-11), 1.68 – 1.62 (m, 2H, H-6), 1.60 – 1.54 (m, 1H, H-7), 1.49 – 1.44 (m, 1H, H-7'), 0.90 (t,  $^3J_{H,H} = 7.3$  Hz, 3H, H-8);  $^{13}\text{C}\{^1\text{H}\}$  NMR (151 MHz,  $\text{CDCl}_3$ ):  $\delta$  174.7 (C-4), 129.4 (C-10), 129.1 (C-9), 74.8 (quint,

$^2J_{C,F} = 11.0$  Hz, C-1), 51.7 (C-5), 49.4 (C-3), 42.3 (quint,  $^3J_{C,F} = 3.2$  Hz, C-2), 32.0 (C-11), 20.6 (C-6), 17.94 (C-7), 13.9 (C-8);  $^{19}\text{F}$  NMR (282 MHz,  $\text{CDCl}_3$ ):  $\delta$  85.24 (quint,  $^2J_{F,F} = 145.5$  Hz, 1F, SF), 66.76 (dt,  $^2J_{F,F} = 144.0$ ,  $^3J_{F,H} = 8.5$  Hz, 4F, SF<sub>4</sub>).

*Methyl (E)-2-(2-bromoethyl)-3-[(pentafluoro- $\lambda^6$ -sulfanyl)methyl]hex-4-enoates (29e).*

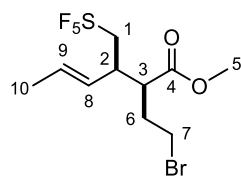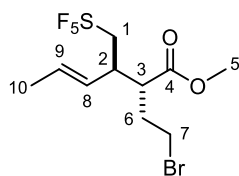

*Major product.*  $^1\text{H}$  NMR (500 MHz,  $\text{CDCl}_3$ ):  $\delta$  5.62 (dq,  $^3J_{H,H} = 15.1$ ,  $^3J_{H,H} = 6.0$  Hz, 1H, H-9), 5.28 (dd,  $^3J_{H,H} = 15.3$ ,  $^3J_{H,H} = 9.3$  Hz, 1H, H-8), 3.71 (s, 3H, H-5), 3.71 – 3.64 (m, 2H, H-1), 3.45 (t,  $^3J_{H,H} = 6.5$  Hz, 1H, H-3), 3.34 (dtd,  $^3J_{H,H} = 10.3$ ,  $^3J_{H,H} = 8.4$ ,  $^3J_{H,H} = 6.1$  Hz, 1H, H-2), 2.91 (dt,  $^2J_{H,H} = 8.9$ ,  $^3J_{H,H} = 4.6$  Hz, 1H, H-7), 2.83 (dt,  $^2J_{H,H} = 9.1$ ,  $^3J_{H,H} = 4.5$  Hz, 1H, H-7'), 2.28 (ddt,  $^2J_{H,H} = 15.2$ ,  $^3J_{H,H} = 9.4$ ,  $^3J_{H,H} = 5.9$  Hz, 1H, H-6), 1.90 (dddd, 1H,  $^2J_{H,H} = 14.7$ ,  $^3J_{H,H} = 8.3$ ,  $^3J_{H,H} = 6.6$ ,  $^3J_{H,H} = 4.6$  Hz, 1H, H-6'), 1.70 (ddd,  $^3J_{H,H} = 6.4$ ,  $^4J_{H,H} = 4.5$ ,  $^5J_{H,H} = 1.6$  Hz, 3H, H-10);  $^{13}\text{C}\{^1\text{H}\}$  NMR (126 MHz,  $\text{CDCl}_3$ ):  $\delta$  172.8 (C-4), 130.5 (C-9), 127.1 (C-8), 74.9 (quint,  $^2J_{C,F} = 11.6$  Hz, C-1), 52.0 (C-5), 46.9 (C-3), 42.2 (quint,  $^3J_{C,F} = 3.4$  Hz, C-2), 32.8 (C-7), 30.8 (C-10), 18.0 (C-6);  $^{19}\text{F}$  NMR (564 MHz,  $\text{CDCl}_3$ ):  $\delta$  84.94 (quint,  $^2J_{F,F} = 145.9$  Hz, 1F, SF), 66.35 (dt,  $^2J_{F,F} = 145.9$ ,  $^3J_{F,H} = 8.3$  Hz, 4F, SF<sub>4</sub>).

*Minor product.*  $^1\text{H}$  NMR (500 MHz,  $\text{CDCl}_3$ ):  $\delta$  5.61 (dq,  $^3J_{H,H} = 15.1$ ,  $^3J_{H,H} = 6.3$  Hz, 1H, H-9), 5.21 (ddd,  $^3J_{H,H} = 15.3$ ,  $^3J_{H,H} = 9.2$  Hz,  $^4J_{H,H} = 1.8$  Hz, 1H, H-8), 3.94 (m, 2H, H-1), 3.72 (s, H, H-5), 3.47 (td,  $^3J_{H,H} = 6.7$ ,  $J_{H,H} = 1.7$  Hz, 1H, H-3), 3.28 (dtd,  $^3J_{H,H} = 10.3$ ,  $^3J_{H,H} = 8.9$ ,  $^3J_{H,H} = 6.2$  Hz, 1H, H-2), 3.08 (dt,  $^2J_{H,H} = 9.0$ ,  $^3J_{H,H} = 6.8$  Hz, 1H, H-7), 2.67 (ddd,  $^2J_{H,H} = 10.5$ ,  $^3J_{H,H} = 7.1$ ,  $^3J_{H,H} = 3.5$  Hz, 1H, H-7'), 2.20 (m, 1 H, H-6), 1.98 (dddd,  $^2J_{H,H} = 14.5$ ,  $^3J_{H,H} = 8.9$ ,  $^3J_{H,H} = 7.0$ ,  $^3J_{H,H} = 3.5$  Hz, 1H, H-6'), 1.70 (ddd,  $^3J_{H,H} = 6.4$ ,  $^4J_{H,H} = 4.5$ ,  $^5J_{H,H} = 1.6$  Hz, 3H, H-10);

$^{13}\text{C}\{^1\text{H}\}$  NMR (126 MHz,  $\text{CDCl}_3$ ):  $\delta$  173.4 (C-4), 130.4 (C-9), 128.1 (C-8), 74.5 (quint,  $^2J_{\text{C,F}} = 11.4$  Hz, C-1), 52.1 (C-5), 47.7 (C-3), 41.9 (quint,  $^3J_{\text{C,F}} = 3.6$  Hz, C-2), 32.1 (C-7), 30.6 (C-10), 17.97 (C-6);  $^{19}\text{F}$  NMR (564 MHz,  $\text{CDCl}_3$ ):  $\delta$  84.74 (quint,  $^2J_{\text{F,F}} = 146.4$  Hz, 1F, SF), 66.83 (dt,  $^2J_{\text{F,F}} = 146.4$ ,  $^3J_{\text{F,H}} = 8.3$  Hz, 4F, SF<sub>4</sub>).

*Methyl syn-(E)-2-chloro-3-[(pentafluoro- $\lambda^6$ -sulfanyl)methyl]hex-4-enoates (syn-29f).*  $^1\text{H}$  NMR

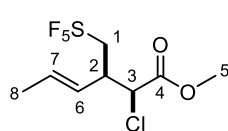

(600 MHz,  $\text{CDCl}_3$ ):  $\delta$  5.71 (dq,  $^3J_{\text{H,H}} = 15.2$ ,  $^3J_{\text{H,H}} = 6.5$  Hz, 1H, H-7), 5.37 (m, 1H, H-6), 4.62 (d,  $^3J_{\text{H}_2\text{-H}_3} = 3.5$  Hz, 1H, H-3), 3.86 – 3.68 (m, 2H, H-1), 3.78 (s, 3H, H-5), 3.50 (tdd,  $^3J_{\text{H,H}} = 9.2$ ,  $^3J_{\text{H,H}} = 6.3$ ,  $^3J_{\text{H}_2\text{-H}_3} = 3.3$  Hz, 1H, H-

2), 1.71 (ddd,  $^3J_{\text{H,H}} = 8.4$ ,  $^3J_{\text{H,H}} = 6.5$ ,  $^4J_{\text{H,H}} = 1.7$  Hz, 3H, H-8);  $^{13}\text{C}\{^1\text{H}\}$  NMR (151 MHz,  $\text{CDCl}_3$ ):  $\delta$  167.9 (C-4), 132.2 (C-7), 124.9 (C-6), 73.0 (quint,  $^2J_{\text{C,F}} = 12.2$  Hz, C-1), 60.5 (quint,  $^4J_{\text{C,F}} = 1.7$  Hz, C-3), 53.2 (C-5), 43.8 (quint,  $^3J_{\text{C,F}} = 3.5$  Hz, C-2), 18.06 (C-8);  $^{19}\text{F}$  NMR (564 MHz,  $\text{CDCl}_3$ ):  $\delta$  84.69 (quint,  $^2J_{\text{F,F}} = 146.0$  Hz, 1F, SF), 66.92 (dt,  $^2J_{\text{F,F}} = 146.0$ ,  $^3J_{\text{F,H}} = 8.4$ , 4F, SF<sub>4</sub>).

*Methyl anti-(E)-2-chloro-3-[(pentafluoro- $\lambda^6$ -sulfanyl)methyl]hex-4-enoates (anti-29f).*  $^1\text{H}$  NMR

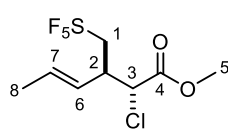

(600 MHz,  $\text{CDCl}_3$ ):  $\delta$  5.73 (dq,  $^3J_{\text{H,H}} = 15.2$ ,  $^3J_{\text{H,H}} = 6.5$  Hz, 1H, H-7), 5.36 (m, 1H, H-6), 4.17 (d,  $^3J_{\text{H}_2\text{-H}_3} = 7.3$  Hz, 1H, H-3), 4.15 – 4.01 (m, 2H, H-1), 3.78 (s, 3H, H-5), 3.32 (qd,  $^3J_{\text{H,H}} = 9.4$ ,  $^3J_{\text{H,H}} = 2.7$  Hz, 1H, H-2), 1.71

(ddd,  $^3J_{\text{H,H}} = 8.4$ ,  $^3J_{\text{H,H}} = 6.5$ ,  $^4J_{\text{H,H}} = 1.7$  Hz, 3H, H-8);  $^{13}\text{C}\{^1\text{H}\}$  NMR (151 MHz,  $\text{CDCl}_3$ ):  $\delta$  168.2 (C-4), 132.3 (C-7), 126.4 (C-6), 72.9 (quint,  $^2J_{\text{C,F}} = 12.8$  Hz, C-1), 59.3 (C-3), 53.1 (C-5), 44.2 (quint,  $^3J_{\text{C,F}} = 3.7$  Hz, C-2), 18.04 (C-8);  $^{19}\text{F}$  NMR (564 MHz,  $\text{CDCl}_3$ ):  $\delta$  84.67 (quint,  $^2J_{\text{F,F}} = 146.2$  Hz, 1F, SF), 67.98 (dt,  $^2J_{\text{F,F}} = 146.8$ ,  $^3J_{\text{F,H}} = 8.3$  Hz, 4F, SF<sub>4</sub>).

*(E)-3-[(Pentafluoro- $\lambda^6$ -sulfanyl)methyl]hex-4-en-1-ol (30).*  $^1\text{H}$  NMR (300 MHz,  $\text{CDCl}_3$ ):  $\delta$  5.61

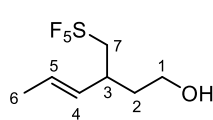

(dq,  $^3J_{\text{H,H}} = 15.3$ ,  $^3J_{\text{H,H}} = 6.4$  Hz, 1H, H-5), 5.22 (ddd,  $^3J_{\text{H,H}} = 15.2$ ,  $^3J_{\text{H,H}} = 9.1$ ,  $^4J_{\text{H,H}} = 1.8$  Hz, 1H, H-4), 3.74 – 3.59 (m, 4H, H-7 and H-1), 2.90 (ttd,  $^3J_{\text{H,H}} = 10.2$ ,  $J_{\text{H,H}} = 6.6$ ,  $J_{\text{H,H}} = 4.1$  Hz, 1H, OH), 1.81 (dddd,  $^3J_{\text{H,H}} = 14.1$ ,  $^3J_{\text{H,H}} = 8.0$ ,

$^3J_{\text{H,H}} = 6.3$ ,  $J_{\text{H,H}} = 4.1$ , 1H, H-3), 1.70 (dd,  $^3J_{\text{H,H}} = 6.5$ ,  $^4J_{\text{H,H}} = 1.7$  Hz, 3H, H-6), 1.57 – 1.44 (m, 2H, H-2);  $^{13}\text{C}\{^1\text{H}\}$  NMR (75 MHz,  $\text{CDCl}_3$ ):  $\delta$  130.9 (C-5), 128.5 (C-4), 77.2 (quint,  $^2J_{\text{C,F}} = 10.2$  Hz, C-7), 60.2 (C-1), 37.6 (quint,  $^3J_{\text{C,F}} = 3.2$  Hz, C-3), 36.7 (C-2), 17.9 (C-6);  $^{19}\text{F}$  NMR (282 MHz,  $\text{CDCl}_3$ ):  $\delta$  85.53 (quint,  $^2J_{\text{F,F}} = 145.8$  Hz, 1F, SF), 66.42 (dtd,  $^2J_{\text{F,F}} = 145.8$ ,  $^3J_{\text{F,H}} = 8.6$ ,  $^4J_{\text{F,H}} = 2.0$  Hz, 4F, SF<sub>4</sub>).

*(E)-3-[(Pentafluoro- $\lambda^6$ -sulfanyl)methyl]hex-4-enal (31).*  $^1\text{H}$  NMR (300 MHz,  $\text{CDCl}_3$ ):  $\delta$  9.70 (t,

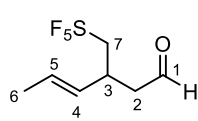

$^3J_{\text{H,H}} = 1.4$ , 1H, H-1), 5.70 – 5.58 (m, 1H, H-5), 5.34 (dd,  $^3J_{\text{H,H}} = 15.2$ ,  $^3J_{\text{H,H}} = 8.2$  Hz, 1H, H-4), 3.73 (quintd,  $^3J_{\text{H,F}} = 8.5$ ,  $^3J_{\text{H,H}} = 6.5$  Hz, 2H, H-7), 3.31 (m, 1H, H-3), 2.75 – 2.56 (AB, 2H, H-2), 1.68 (dd,  $^3J_{\text{H,H}} = 6.4$ ,  $^4J_{\text{H,H}} = 1.6$  Hz, 3H,

H-6);  $^{13}\text{C}\{^1\text{H}\}$  NMR (75 MHz,  $\text{CDCl}_3$ ):  $\delta$  199.8 (C-1), 129.7 (C-5), 129.0 (C-4), 75.6 (quint,  $^2J_{\text{C,F}} = 11.3$  Hz, C-7), 47.3 (quint,  $^3J_{\text{C,F}} = 1.5$  Hz, C-2), 35.0 (quint,  $^3J_{\text{C,F}} = 3.0$  Hz, C-3), 17.9 (C-6);

$^{19}\text{F}$  NMR (282 MHz,  $\text{CDCl}_3$ ):  $\delta$  84.85 (quint,  $^2J_{\text{F,F}} = 145.6$  Hz, 1F, SF), 66.38 (dtd,  $^2J_{\text{F,F}} = 145.6$ ,  $^3J_{\text{F,H}} = 8.5$ ,  $J = 2.1$  Hz, 4F, SF<sub>4</sub>).

(*E*)-1-(Pentafluoro- $\lambda^6$ -sulfanyl)dodec-2-en-4-one (**33b**).  $^1\text{H}$  NMR (300 MHz,  $\text{CDCl}_3$ ):  $\delta$  6.83 (dt,

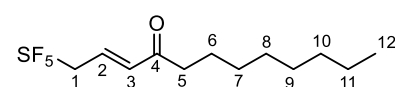  $^3J_{\text{H,H}} = 15.6$ ,  $^3J_{\text{H,H}} = 7.8$  Hz, 1H, H-2), 6.31 (dt,  $^3J_{\text{H,H}} = 15.8$ ,  $^4J_{\text{H,H}} = 1.3$  Hz, 1H, H-3), 4.39 (sexted,  $^3J_{\text{H,H}} = ^3J_{\text{H,F}} = 7.4$ ,  $^4J_{\text{H,H}} = 1.2$  Hz, 2H, H-1), 2.59 (m, 2H, H-5), 1.62 (quint,  $^3J_{\text{H,H}} = 7.2$  Hz, 2H, H-6), 1.31 – 1.24 (m, 10H, H-7 – H-11), 0.88 (t,  $^3J_{\text{H,H}} = 7.0$  Hz, 3H, H-12);  $^{13}\text{C}\{^1\text{H}\}$  NMR (75 MHz,  $\text{CDCl}_3$ ):  $\delta$  199.4 (C-4), 136.0 (C-3), 132.2 (quint,  $^3J_{\text{C,F}} = 4.3$  Hz, C-2), 72.0 (quint,  $^2J_{\text{C,F}} = 16.2$  Hz, C-1), 41.0 (C-5), 31.9 (C-6), 29.4 (C-7), 29.2 (C-8), 29.2 (C-9), 23.9 (C-10), 22.7 (C-11), 14.2 (C-12);  $^{19}\text{F}$  NMR (282 MHz,  $\text{CDCl}_3$ ):  $\delta$  81.06 (nonet,  $^2J_{\text{F,F}} = 146.0$  Hz, 1F, SF), 66.17 (dt,  $^2J_{\text{F,F}} = 146.0$ ,  $^3J_{\text{F,H}} = 7.4$  Hz, 4F, SF<sub>4</sub>).

(*E*)-1-(Pentafluoro- $\lambda^6$ -sulfanyl)dodec-2-en-4-ol (**28b**).  $^1\text{H}$  NMR (300 MHz,  $\text{CDCl}_3$ ):  $\delta$  5.90 – 5.80

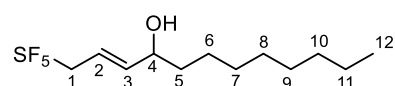 (m, 2H, H-2 and H-3), 4.28 (dtd,  $^2J_{\text{H,H}} = 13.7$ ,  $^3J_{\text{H,H}} = 9.6$ ,  $J_{\text{H,H}} = 5.2$  Hz, 2H, H-1), 4.17 (m,  $^3J_{\text{H,H}} = 6.3$  Hz, 1H, H-4), 2.11 (bs, 1H, OH), 1.53 (tt,  $^3J_{\text{H,H}} = 9.7$ ,  $^3J_{\text{H,H}} = ^4J_{\text{H,H}} = 6.7$  Hz, 2H, H-5), 1.31 – 1.24 (m, 12H, H-6 – H-11), 0.89 (t,  $^3J_{\text{H,H}} = 7.0$  Hz, 3H, H-12);  $^{13}\text{C}\{^1\text{H}\}$  NMR (75 MHz,  $\text{CDCl}_3$ ):  $\delta$  143.0 (C-3), 119.5 (quint,  $^3J_{\text{C,F}} = 4.1$  Hz, C-2), 73.5 (quint,  $^2J_{\text{C,F}} = 14.4$  Hz, C-1), 71.8 (C-4), 37.0 (C-5), 32.0 (C-6), 29.6 (C-7), 29.6 (C-8), 29.3 (C-9), 25.3 (C-10), 22.8 (C-11), 14.2 (C-12);  $^{19}\text{F}$  NMR (282 MHz,  $\text{CDCl}_3$ ):  $\delta$  82.60 (nonet,  $^2J_{\text{F,F}} = 144.5$  Hz, 1F, SF), 63.50 (dt,  $^2J_{\text{F,F}} = 144.5$ ,  $^3J_{\text{F,H}} = 7.4$  Hz, 4F, SF<sub>4</sub>).

(*E*)-5-(Pentafluoro- $\lambda^6$ -sulfanyl)pent-3-en-2-yl (*tert*-butoxycarbonyl)glycinate (**34a**).  $^1\text{H}$  NMR

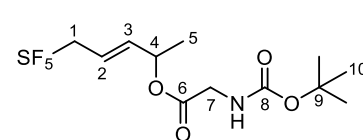 (300 MHz,  $\text{CDCl}_3$ ):  $\delta$  5.94 – 5.85 (m, 1H, H-2), 5.80 (dd,  $^3J_{\text{H,H}} = 15.3$ ,  $^3J_{\text{H,H}} = 5.0$  Hz, 1H, H-3), 5.41 (quint,  $^3J_{\text{H,H}} = ^3J_{\text{H,H}} = 6.4$  Hz, 1H, H-4), 5.08 (bt,  $^3J_{\text{H,H}} = 5.8$  Hz, 1H, NH), 4.23 (sextet,  $^3J_{\text{H,H}} = ^3J_{\text{H,F}} = 7.1$ , 2H, H-1), 3.87 (d,  $^3J_{\text{H,H}} = 5.3$  Hz, 2H, H-7), 1.41 (s, 9H, 3  $\times$  H-10), 1.33 (d,  $^3J_{\text{H,H}} = 6.6$  Hz, 3H, H-5);  $^{13}\text{C}\{^1\text{H}\}$  NMR (75 MHz,  $\text{CDCl}_3$ ):  $\delta$  169.5 (C-8), 155.7 (C-6), 138.4 (C-3), 121.2 (quint,  $^3J_{\text{C,F}} = 4.1$  Hz, C-2), 80.0 (C-4), 72.9 (quint,  $^2J_{\text{C,F}} = 14.8$  Hz, C-1), 70.5 (C-7), 42.5 (C-9), 28.2 (3  $\times$  C-10), 19.6 (C-5);  $^{19}\text{F}$  NMR (282 MHz,  $\text{CDCl}_3$ ):  $\delta$  82.22 (nonet,  $^2J_{\text{F,F}} = 144.7$  Hz, 1F, SF), 63.99 (dt,  $^2J_{\text{F,F}} = 144.6$ ,  $^3J_{\text{F,H}} = 7.2$  Hz, 4F, SF<sub>4</sub>).

(*E*)-1-(Pentafluoro- $\lambda^6$ -sulfanyl)dodec-2-en-4-yl-(*tert*-butoxycarbonyl)glycinate (**34b**).  $^1\text{H}$  NMR

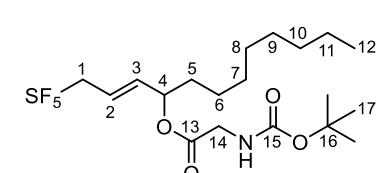 (300 MHz,  $\text{CDCl}_3$ ):  $\delta$  5.89 (dt,  $^3J_{\text{H,H}} = 14.9$ ,  $^3J_{\text{H,H}} = 7.3$  Hz, 1H, H-2), 5.76 (dd,  $^3J_{\text{H,H}} = 15.5$ ,  $^3J_{\text{H,H}} = 6.3$  Hz, 1H, H-3), 5.30 (q,  $^3J_{\text{H,H}} = ^3J_{\text{H,H}} = 6.5$  Hz, 1H, H-4), 5.01 (bs, 1H, NH), 4.24 (dtd,  $^3J_{\text{H,H}} = 13.7$ ,  $^3J_{\text{H,H}} = 9.5$ ,  $^3J_{\text{H,H}} = 6.4$  Hz, 2H, H-1), 3.89 (s, 2H, H-14), 1.63 (tdd,  $^3J_{\text{H,H}} = 14.6$ ,  $^3J_{\text{H,H}} = 10.8$ ,  $^4J_{\text{H,H}} = 6.3$  Hz, 2H, H-5), 1.44 (s, 9H, 3  $\times$  H-17), 1.31 – 1.24 (m, 12H, H-6 – H-11), 0.89 (t,  $^3J_{\text{H,H}} = 7.0$  Hz, 3H, H-12);  $^{13}\text{C}\{^1\text{H}\}$  NMR (75 MHz,  $\text{CDCl}_3$ ):  $\delta$  169.6 (C-15), 155.6 (C-13), 137.7 (C-3), 122.1 (quint,  $^3J_{\text{C,F}} = 3.8$  Hz, C-2), 80.0 (C-4), 74.4 (C-

16), 72.9 (quint,  $^2J_{C,F} = 14.9$  Hz, C-1), 42.5 (C-5), 33.9 (C-6), 31.8 (C-7), 29.3 (C-8), 29.2 (C-9), 29.1 (C-10), 28.2 (3 × C-17), 24.7 (C-16), 22.6 (C-11), 14.1 (C-12);  $^{19}\text{F}$  NMR (282 MHz,  $\text{CDCl}_3$ ):  $\delta$  82.22 (nonet,  $^2J_{F,F} = 144.5$  Hz, 1F, SF), 64.03 (dt,  $^2J_{F,F} = 144.5$ ,  $^3J_{F,H} = 7.0$  Hz, 4F, SF<sub>4</sub>).

(*E*)-1-(Pentafluoro- $\lambda^6$ -sulfanyl)pent-2-en-4-yl 2-(pentafluoro- $\lambda^6$ -sulfanyl)acetate (**36a**).  $^1\text{H}$  NMR

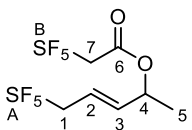 (300 MHz,  $\text{CDCl}_3$ ):  $\delta$  5.96 (dt,  $^3J_{H,H} = 14.9$ ,  $^3J_{H,H} = 5.8$  Hz, 1H, H-2), 5.84 (dd,  $^3J_{H,H} = 15.5$ ,  $^3J_{H,H} = 5.9$  Hz, 1H, H-3), 5.47 (quint,  $^3J_{H,H} = 6.4$  Hz, 1H, H-4), 4.40 – 4.20 (m, 4H, H-1, H-7), 1.40 (d,  $^3J_{H,H} = 6.5$  Hz, 3H, H-5);  $^{13}\text{C}\{^1\text{H}\}$  NMR (75 MHz,  $\text{CDCl}_3$ ):  $\delta$  161.2 (quint,  $^3J_{C,F} = 4.5$  Hz, C-6), 137.3 (broad, C-3), 122.3 (quint,  $^3J_{C,F} = 4.1$  Hz, C-2), 72.7 (quint,  $^2J_{C,F} = 15.6$  Hz, C-7), 72.2 (C-4), 70.8 (quint,  $^2J_{C,F} = 16.9$  Hz, C-1), 19.3 (C-5);  $^{19}\text{F}$  NMR (282 MHz,  $\text{CDCl}_3$ ):  $\delta$  81.53 (nonet,  $^2J_{F,F} = 148.4$  Hz, 1F, SF<sup>B</sup>), 78.88 (nonet,  $^2J_{F,F} = 145.0$  Hz, 1F, SF<sup>A</sup>), 70.95 (dm,  $^2J_{F,F} = 148.4$ ,  $^3J_{F,H} = 7.6$  Hz, 4F, SF<sub>4</sub><sup>B</sup>), 63.68 (dm,  $^2J_{F,F} = 145.0$ ,  $^3J_{F,H} = 7.8$  Hz, 4F, SF<sub>4</sub><sup>A</sup>).

(*E*)-1-(Pentafluoro- $\lambda^6$ -sulfanyl)dodec-2-en-4-yl 2-(pentafluoro- $\lambda^6$ -sulfanyl)acetate (**36b**).  $^1\text{H}$  NMR

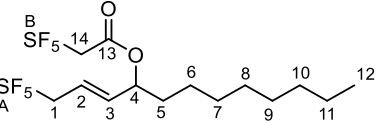 (300 MHz,  $\text{CDCl}_3$ ):  $\delta$  5.95 (dt,  $^3J_{H,H} = 15.3$ ,  $^3J_{H,H} = 7.6$  Hz, 1H, H-2), 5.78 (dd,  $^3J_{H,H} = 15.5$ ,  $^3J_{H,H} = 6.8$  Hz, 1H, H-3), 5.33 (q,  $^3J_{H,H} = 6.7$  Hz, 1H, H-4), 4.30 (quint,  $^3J_{H,H} = 7.7$  Hz, 2H, H-14), 4.23 (sext,  $^3J_{H,H} = 7.0$  Hz, 2H, H-1), 1.75 – 1.56 (m, 2H, H-5), 1.31 – 1.24 (m, 12H, H-6 – H-11), 0.89 (t,  $^3J_{H,H} = 7.0$  Hz, 3H, H-12);  $^{13}\text{C}\{^1\text{H}\}$  NMR (75 MHz,  $\text{CDCl}_3$ ):  $\delta$  161.4 (quint,  $^3J_{C,F} = 4.3$  Hz, C-13), 136.7 (C-3), 123.2 (quint,  $^3J_{C,F} = 4.1$  Hz, C-2), 76.2 (C-4), 72.8 (quint,  $^2J_{C,F} = 14.8$  Hz, C-14), 71.0 (quint,  $^2J_{C,F} = 16.8$  Hz, C-1), 33.7 (C-5), 31.9 (C-6), 29.4 (C-7), 29.2 (C-8), 29.2 (C-9), 24.7 (C-10), 22.7 (C-11), 14.1 (C-12);  $^{19}\text{F}$  NMR (282 MHz,  $\text{CDCl}_3$ ):  $\delta$  81.55 (nonet,  $^2J_{F,F} = 147.3$  Hz, 1F, SF<sup>B</sup>), 78.94 (nonet,  $^2J_{F,F} = 144.6$  Hz, 1F, SF<sup>A</sup>), 71.03 (dm,  $^2J_{F,F} = 147.3$ ,  $^3J_{F,H} = 7.5$  Hz, 4F, SF<sub>4</sub><sup>B</sup>), 63.69 (dt,  $^2J_{F,F} = 144.6$ ,  $^3J_{F,H} = 7.7$  Hz, 4F, SF<sub>4</sub><sup>A</sup>).

(*Z*)-1,1,1-Trifluoro-5-methoxyhex-4-en-3-one (**38**).  $^1\text{H}$  NMR (300 MHz,  $\text{CDCl}_3$ ):  $\delta$  5.46 (s, 1H,

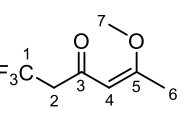 H-4), 3.68 (s, 3H, H-7), 3.18 (q,  $^3J_{H,F} = 10.8$  Hz, 3H, H-2), 2.31 (s, 3H, H-6);  $^{13}\text{C}\{^1\text{H}\}$  NMR (75 MHz,  $\text{CDCl}_3$ ):  $\delta$  187.5 (C-3), 176.2 (C-5), 124.3 (q,  $^1J_{C,F} = 276.7$  Hz, C-1), 98.3 (C-4), 55.8 (C-7), 47.7 (q,  $^2J_{C,F} = 27.4$  Hz, C-2), 20.3 (C-6);  $^{19}\text{F}$  NMR (282 MHz,  $\text{CDCl}_3$ ):  $\delta$  -62.92 (t,  $^3J_{F,H} = 10.8$  Hz, 3F, CF<sub>3</sub>).

(*E*)-6,6,6-Trifluorohex-3-en-2-ol (**42**).  $^1\text{H}$  NMR (300 MHz,  $\text{CDCl}_3$ ):  $\delta$  5.78 (dd,  $^3J_{H,H} = 15.8$ ,  $^3J_{H,H}$

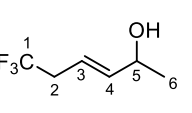 = 6.0 Hz, 1H, H-4), 5.65 – 5.55 (dtd,  $^3J_{H,H} = 15.4$ ,  $^3J_{H,H} = 7.0$ ,  $^3J_{H,H} = 1.2$  Hz, 1H, H-3), 4.32 (quint,  $^3J_{H,H} = 6.3$  Hz, 1H, H-5), 2.80 (qd,  $^3J_{H,F} = 10.7$ ,  $^3J_{H,H} = 7.1$  Hz, 3H, H-2), 1.85 (bs, 1H, OH), 1.27 (d,  $^3J_{H,H} = 6.5$  Hz, 3H, H-6);  $^{13}\text{C}\{^1\text{H}\}$  NMR (75 MHz,  $\text{CDCl}_3$ ):  $\delta$  141.5 (C-4), 125.9 (q,  $^1J_{C,F} = 276.4$  Hz, C-1), 117.6 (q,  $^3J_{C,F} = 3.7$  Hz, C-3), 68.1 (C-5), 36.9 (q,  $^2J_{C,F} = 29.8$  Hz, C-2), 23.1 (C-6);  $^{19}\text{F}$  NMR (282 MHz,  $\text{CDCl}_3$ ):  $\delta$  -66.95 (t,  $^3J_{F,H} = 10.8$  Hz, 3F, CF<sub>3</sub>).

Methyl *syn*-(*E*)-2-chloro-3-(2,2,2-trifluoroethyl)hex-4-enoate and methyl *anti*-(*E*)-2-chloro-3-(2,2,2-trifluoroethyl)hex-4-enoate (**43**). <sup>1</sup>H NMR (300 MHz, CDCl<sub>3</sub>): δ overlap 5.75-5.58 (m, 1H,

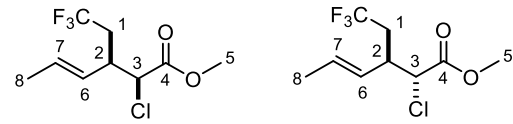
 $2\times \text{H-7}$ , 5.42-5.23 (m, 1H,  $2\times \text{H-6}$ ), 4.47 (d, 1H,  ${}^3J_{\text{H,H}} = 3.9 \text{ Hz}$ , H-3<sub>syn</sub>), 4.17 (d, 1H,  ${}^3J_{\text{H,H}} = 7.5 \text{ Hz}$ , H-3<sub>anti</sub>), 3.78 (s, 3H, H-5<sub>syn</sub>), 3.77 (s, 3H, H-5<sub>anti</sub>), 3.12 (dq,  ${}^3J_{\text{H,H}} = 12.5$ ,  ${}^3J_{\text{H,H}} = 4.4 \text{ Hz}$ , 1H, H-2<sub>syn</sub>), 3.00 (qd,  ${}^3J_{\text{H,H}} = 10.1$ ,  ${}^3J_{\text{H,H}} = 3.0 \text{ Hz}$ , 1H, H-2<sub>anti</sub>), overlap 2.66-2.10 (m, 2H,  $2\times \text{H-1}$ ), 1.68 (d,  ${}^3J_{\text{H,H}} = 6.5$ , 3H,  $2\times \text{H-8}$ ); <sup>13</sup>C{<sup>1</sup>H} NMR (75 MHz, CDCl<sub>3</sub>): δ 168.6 (C-4<sub>anti</sub>), 168.2 (C-4<sub>syn</sub>), 131.3 (C-7<sub>anti</sub>), 130.9 (C-7<sub>syn</sub>), 129.4 (q,  ${}^1J_{\text{C,F}} = 275 \text{ Hz}$ , CF<sub>3</sub>), 127.0 (C-6<sub>anti</sub>), 126.2 (C-6<sub>syn</sub>), 61.2 (C-3<sub>anti</sub>), 60.3 (C-3<sub>syn</sub>), 53.1 (C-5<sub>syn</sub>), 53.0 (C-5<sub>anti</sub>), 41.6 (q,  ${}^3J_{\text{C,F}} = 2.5 \text{ Hz}$ , C-2<sub>anti</sub>), 41.1 (q,  ${}^3J_{\text{C,F}} = 2.8 \text{ Hz}$ , C-2<sub>syn</sub>), 36.0 (d,  ${}^2J_{\text{C,F}} = 27.8 \text{ Hz}$ , C-1<sub>syn</sub>), 35.3 (d,  ${}^2J_{\text{C,F}} = 27.0 \text{ Hz}$ , C-1<sub>anti</sub>), 18.1 ( $\times 2$ , C-8). <sup>19</sup>F{<sup>1</sup>H} NMR (282 MHz, CDCl<sub>3</sub>): δ -64.16 (s, 3F, CF<sub>3syn</sub>) and -63.62 (s, 3F, CF<sub>3anti</sub>).

# <sup>1</sup>H NMR spectrum of compound 4a

May31-2010.320.fid  
hau husstedt whu 55  
proton CDCl<sub>3</sub> /opt/topspin av1 45

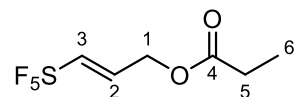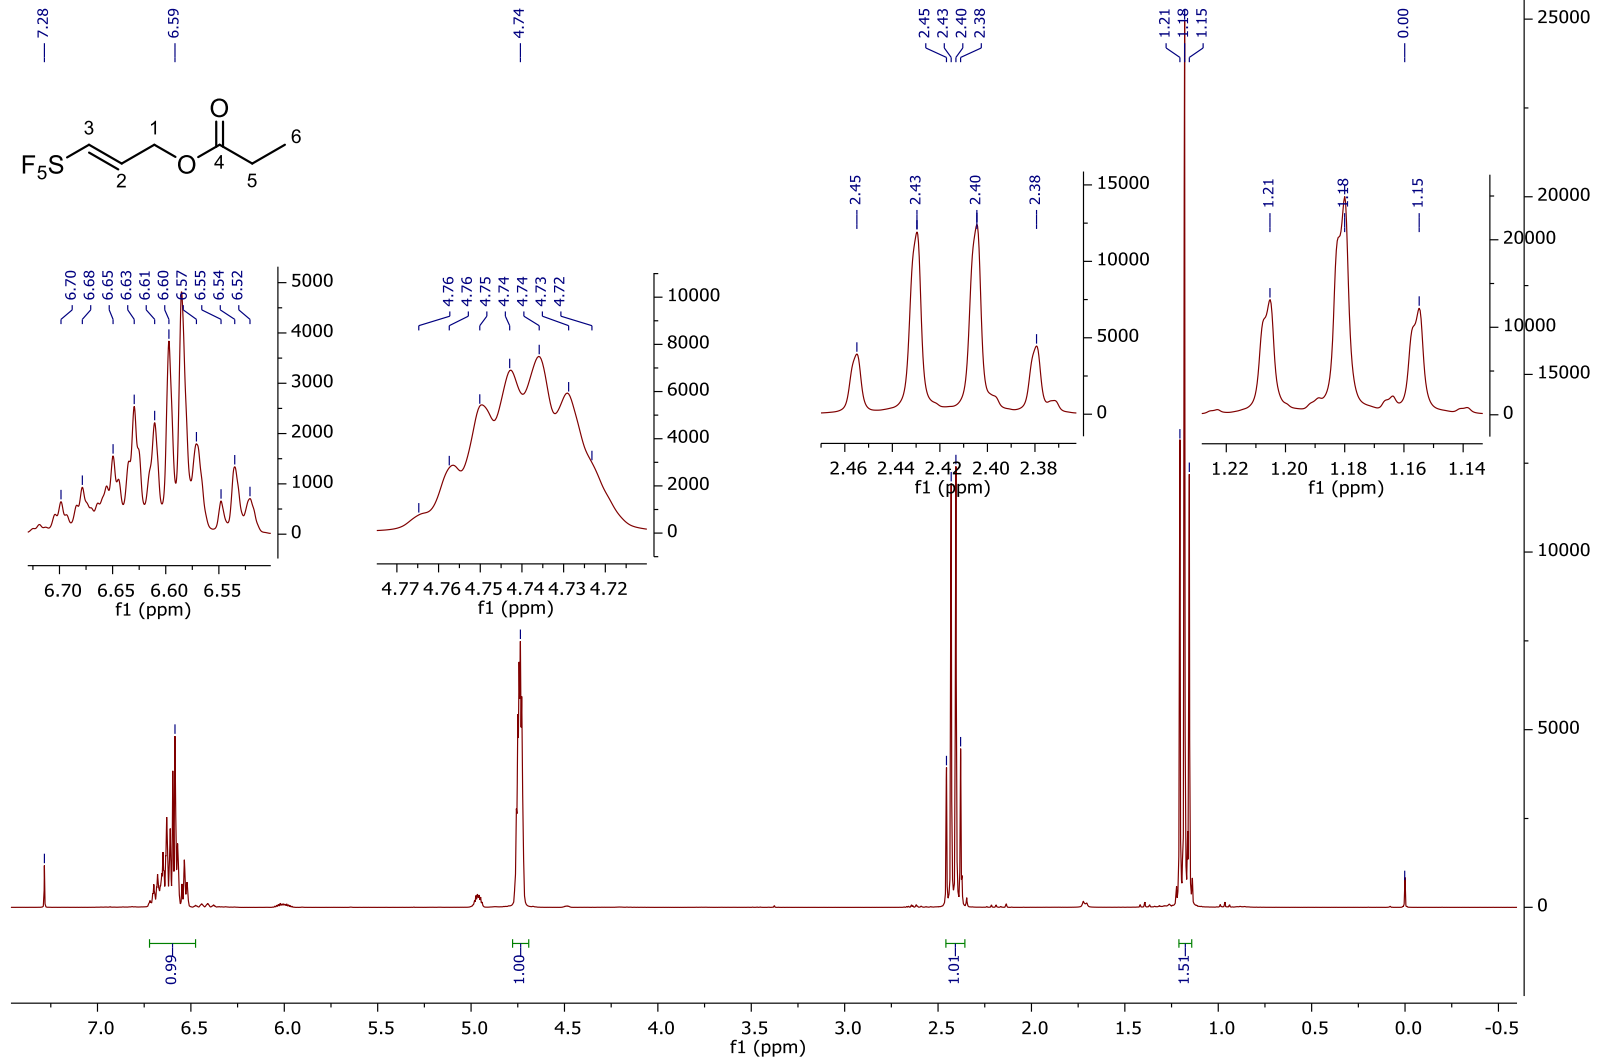

# <sup>13</sup>C NMR spectrum of compound 4a

Mar04-2008.251.fid  
Husstedt whu 55 a  
carbon\_256 CDCl3 /opt/topspin av1 8

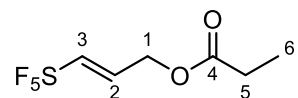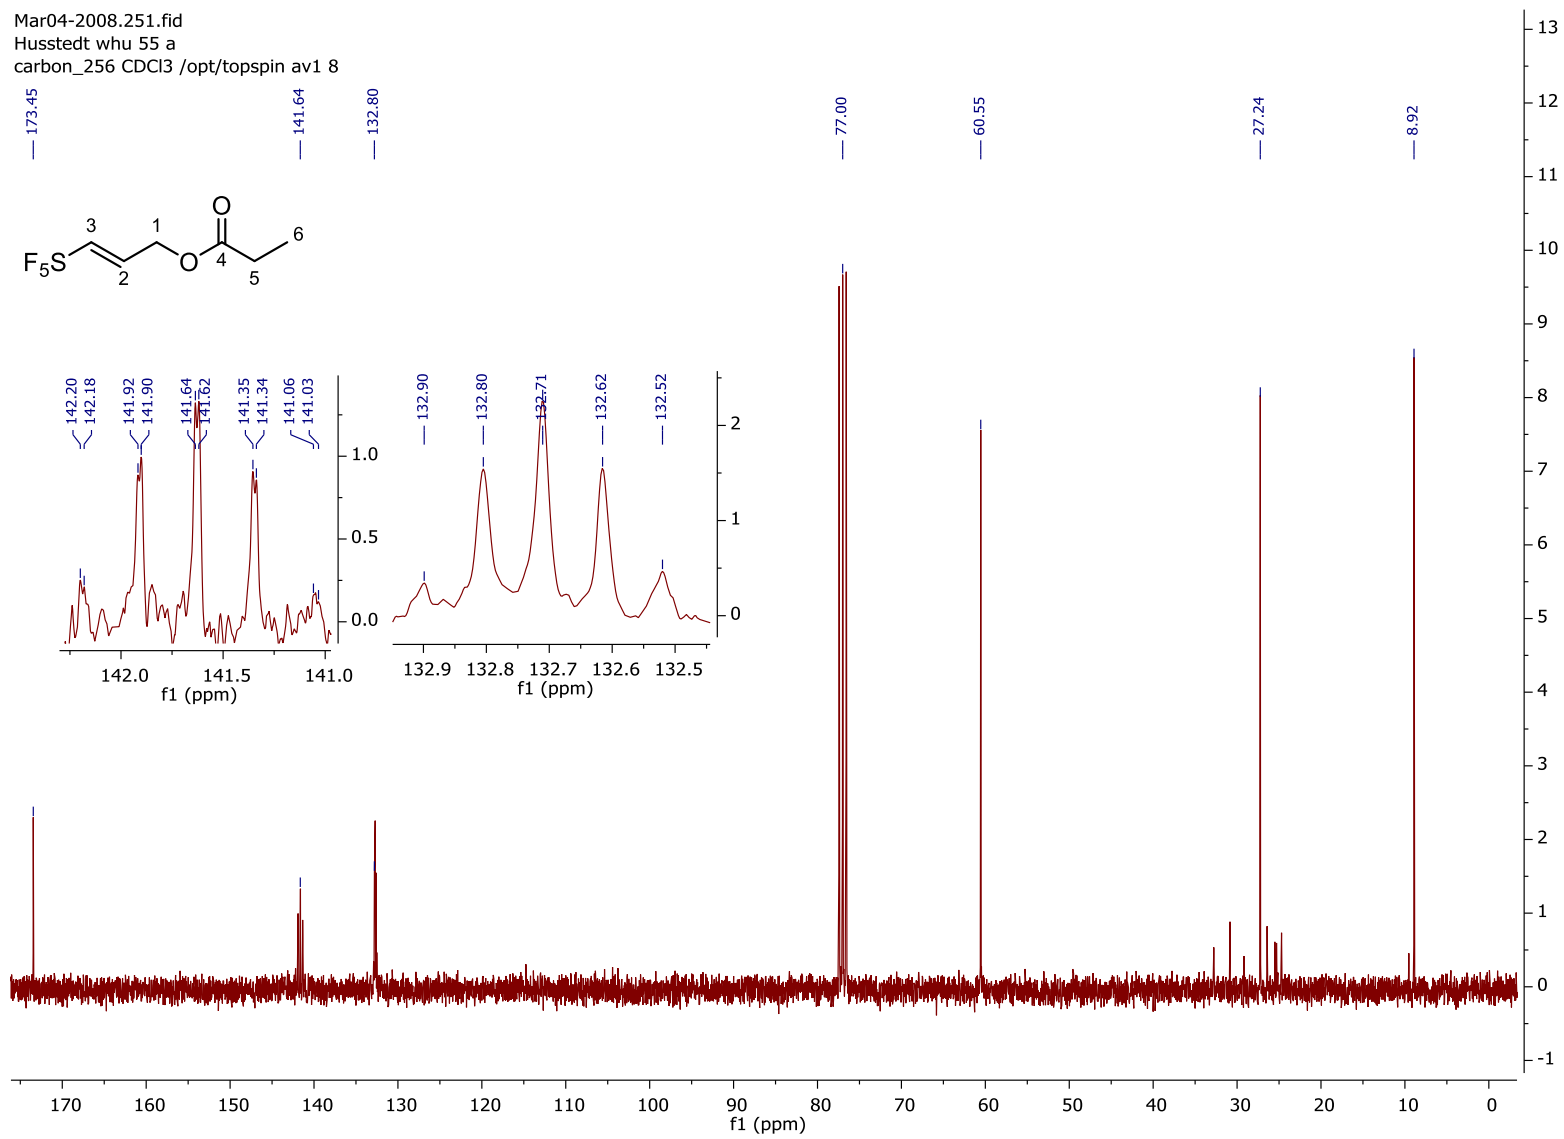

<sup>19</sup>F NMR spectrum of compound **4a**

May31-2010.321.fid  
hau husstedt whu 55  
f19cpd CDCl3 /opt/topspin av1 45

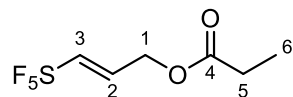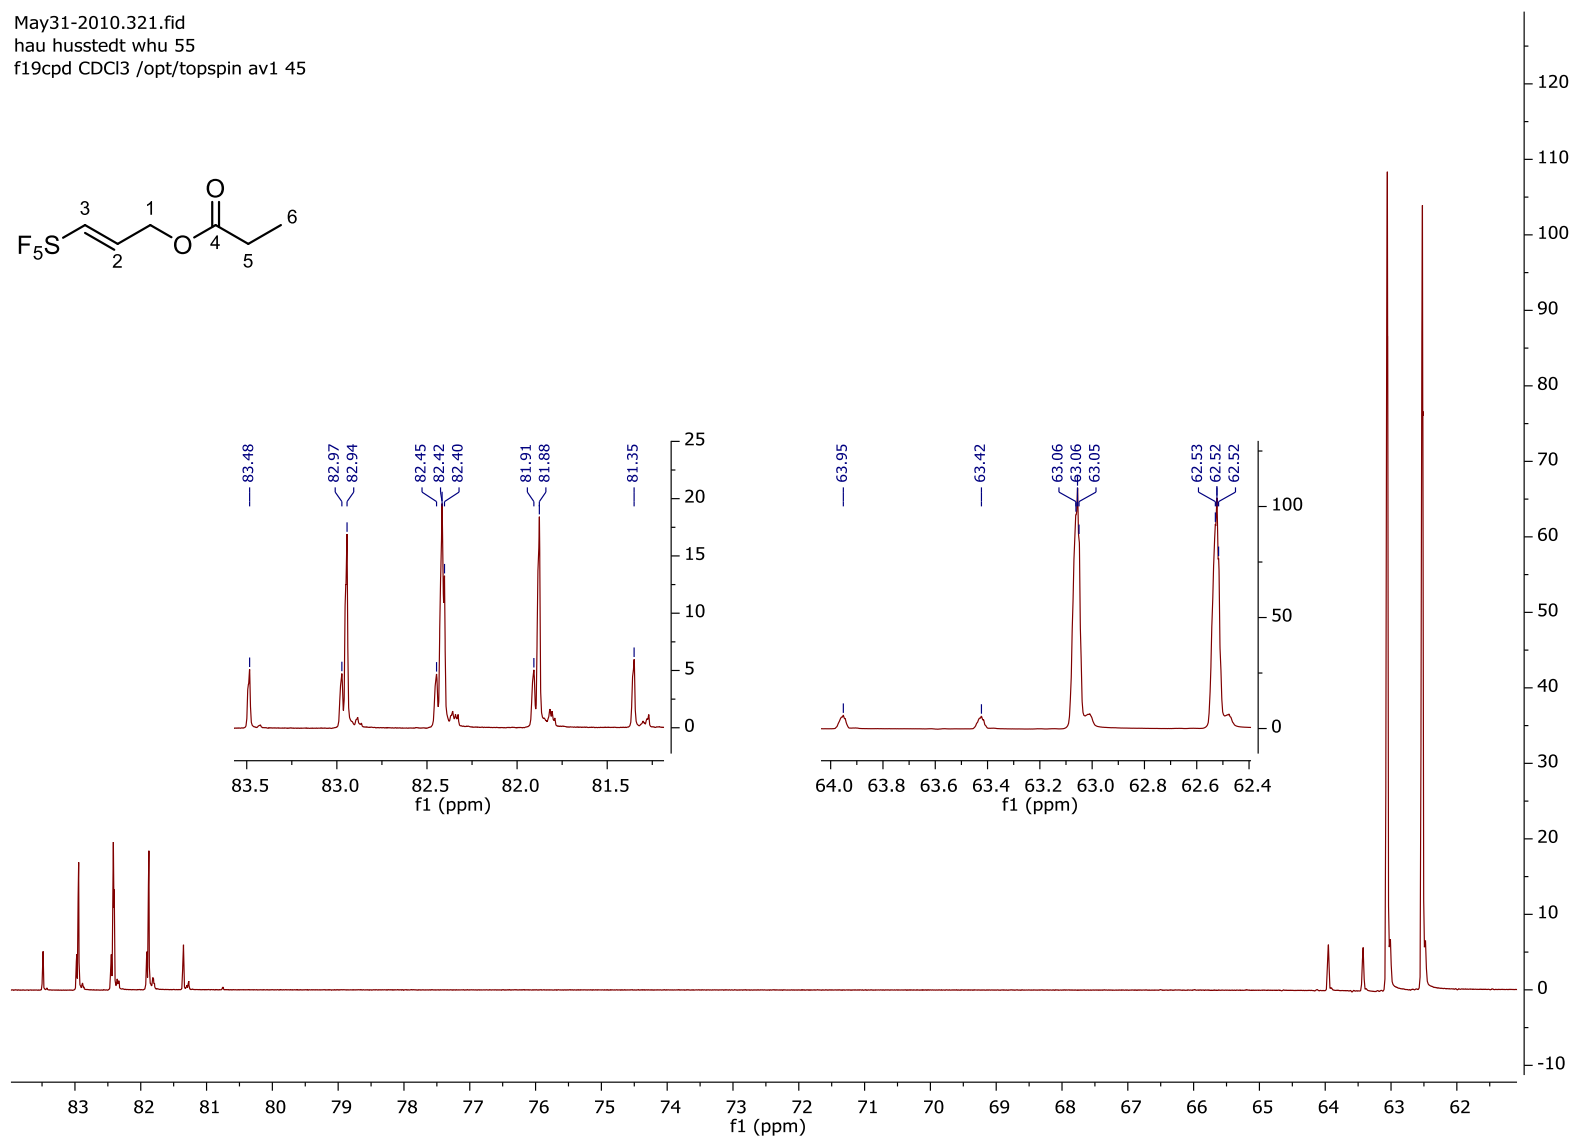



# <sup>1</sup>H NMR spectrum of compound **4b**

Jun25-2008.230.fid  
husstedt whu 72a  
proton CDCl3 /opt/topspin av1 17

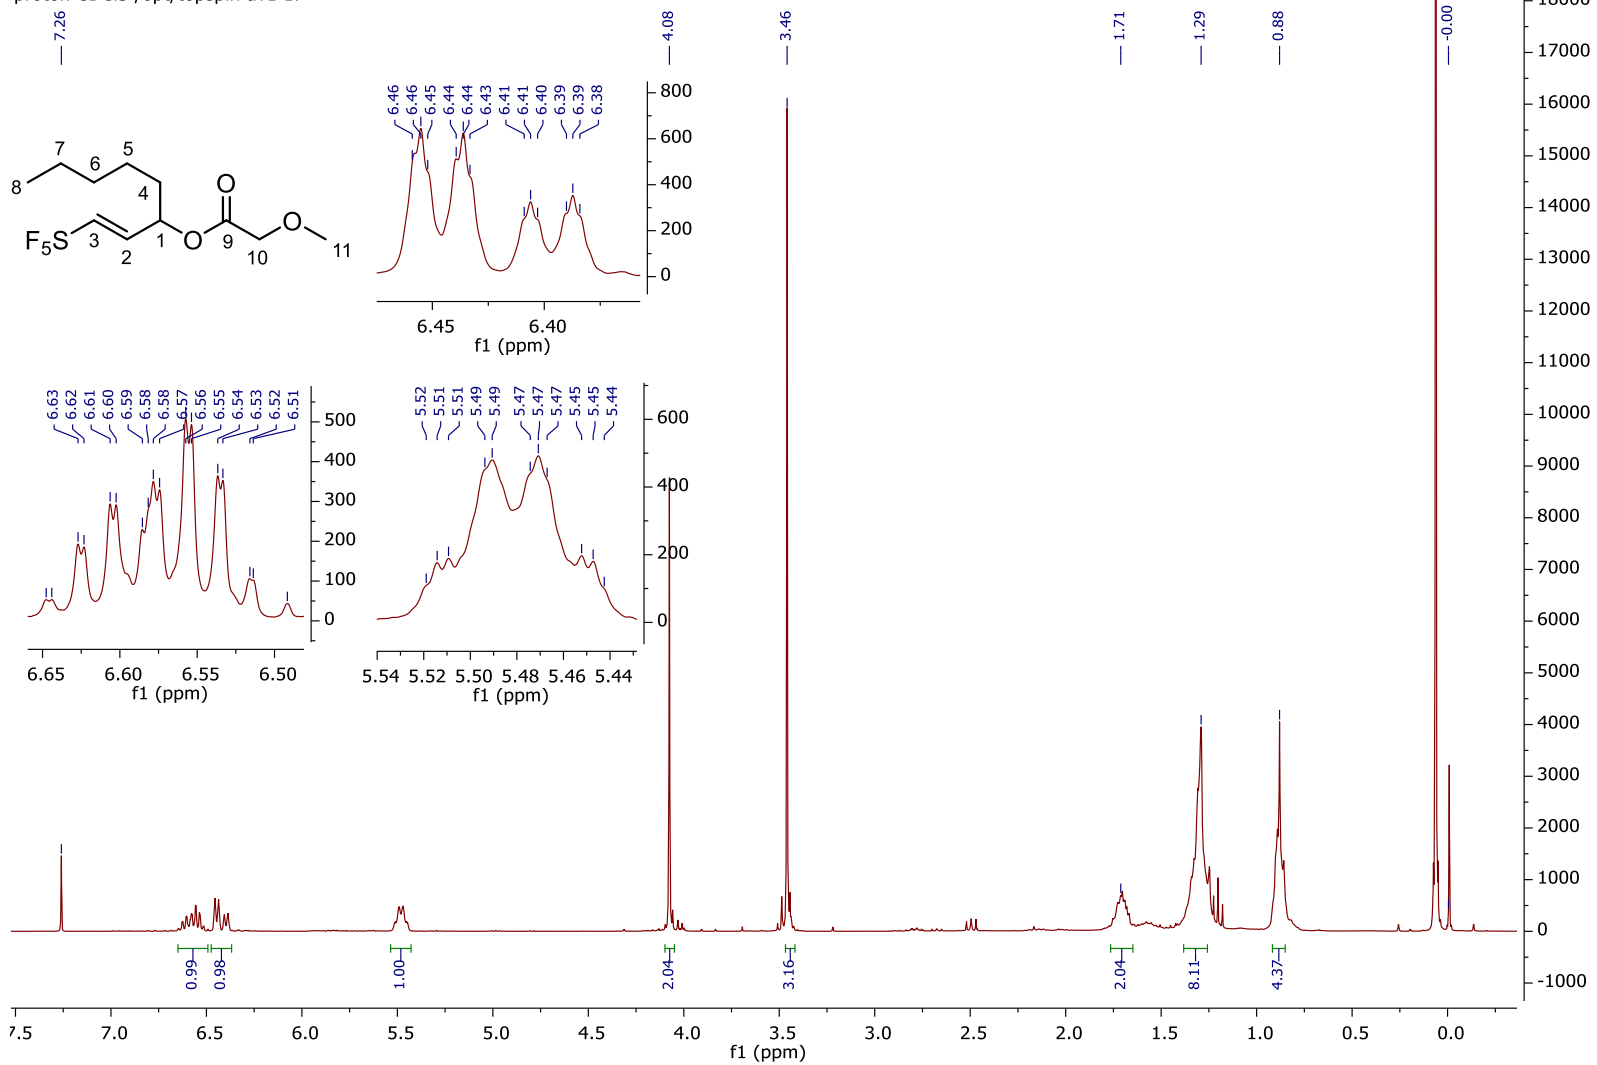

# <sup>13</sup>C NMR spectrum of compound **4b**

Jun25-2008.231.fid  
husstedt whu 72a  
carbon CDCl<sub>3</sub> /opt/topspin av1 17

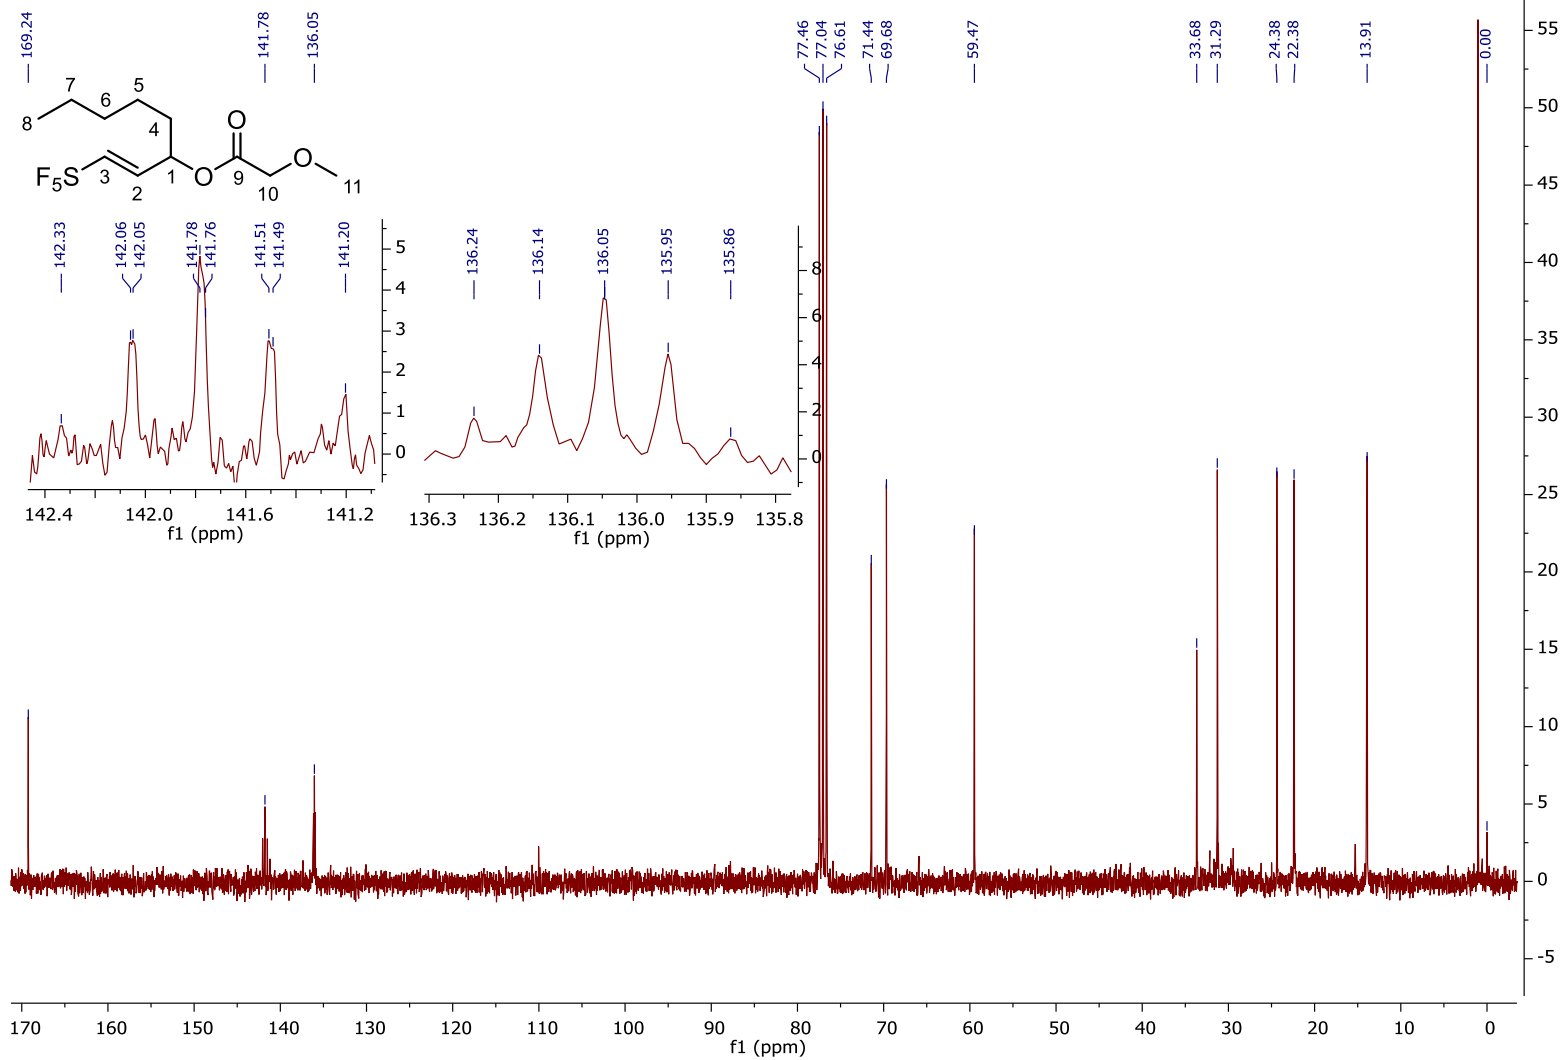

# <sup>1</sup>H NMR spectrum of compound 4c

Sep26-2008  
husstedt whu 89a  
proton CDCl<sub>3</sub> /opt/topspin av1 21

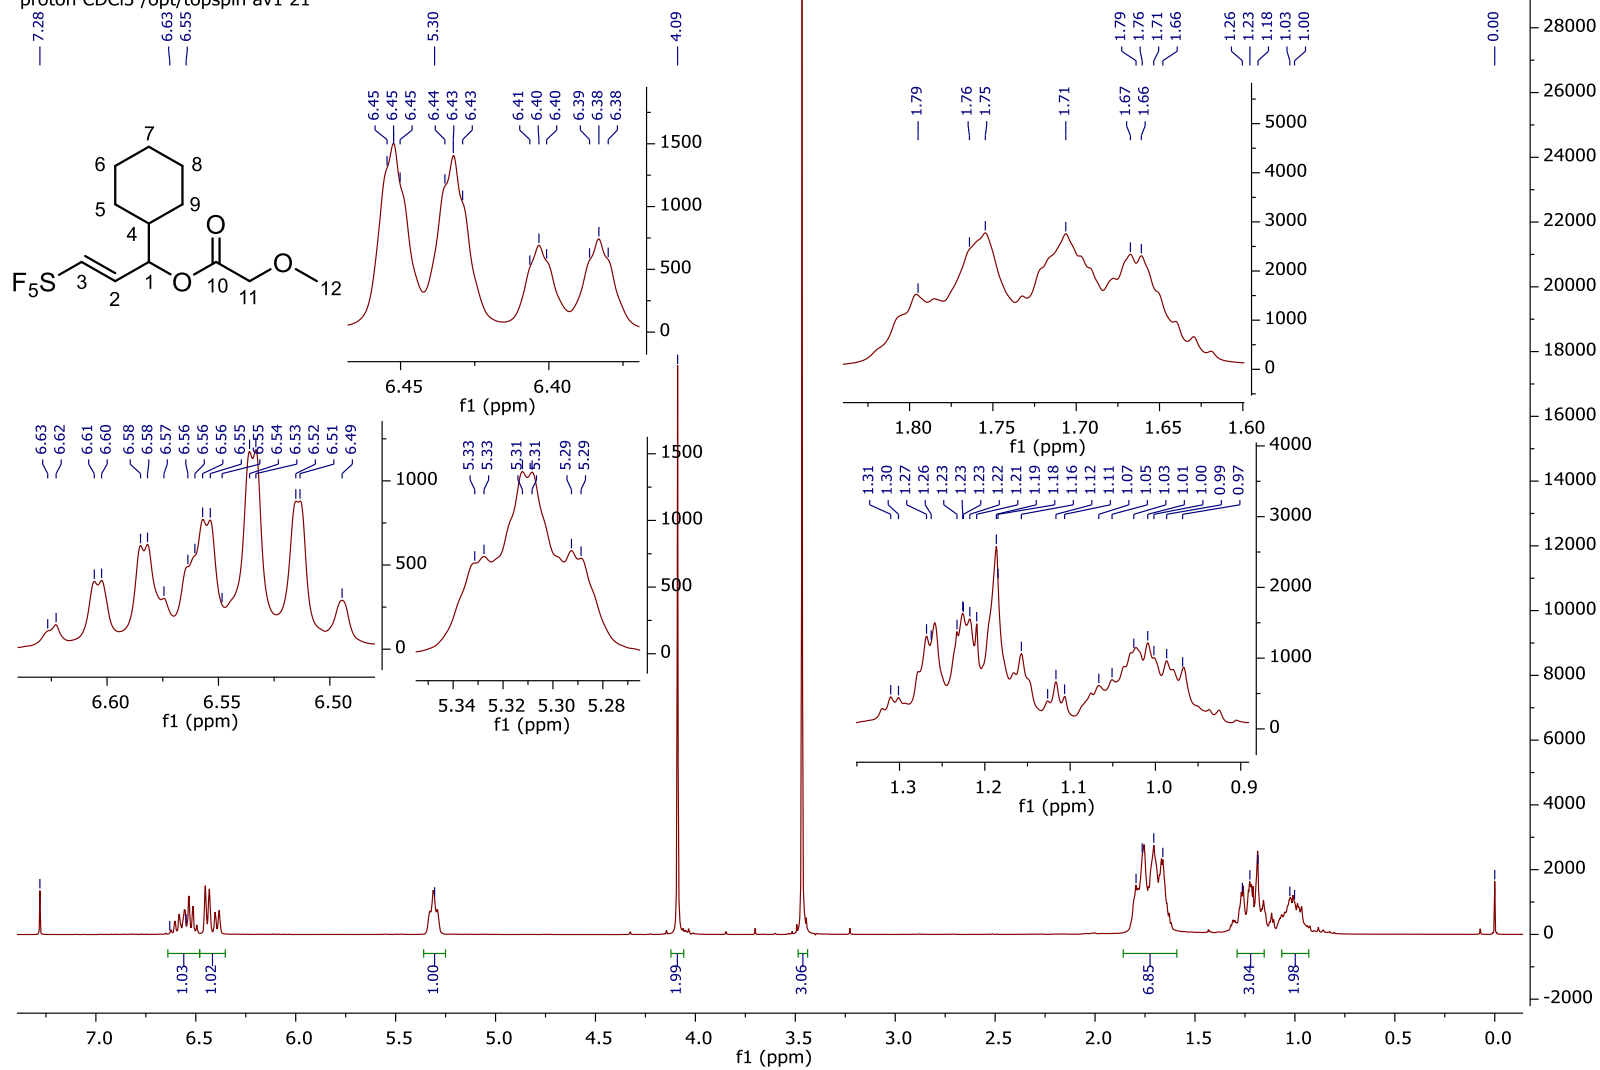

# <sup>13</sup>C NMR spectrum of compound 4c

Sep26-2008  
husstedt whu 89a  
carbon CDCl<sub>3</sub> /opt/topspin av1.21

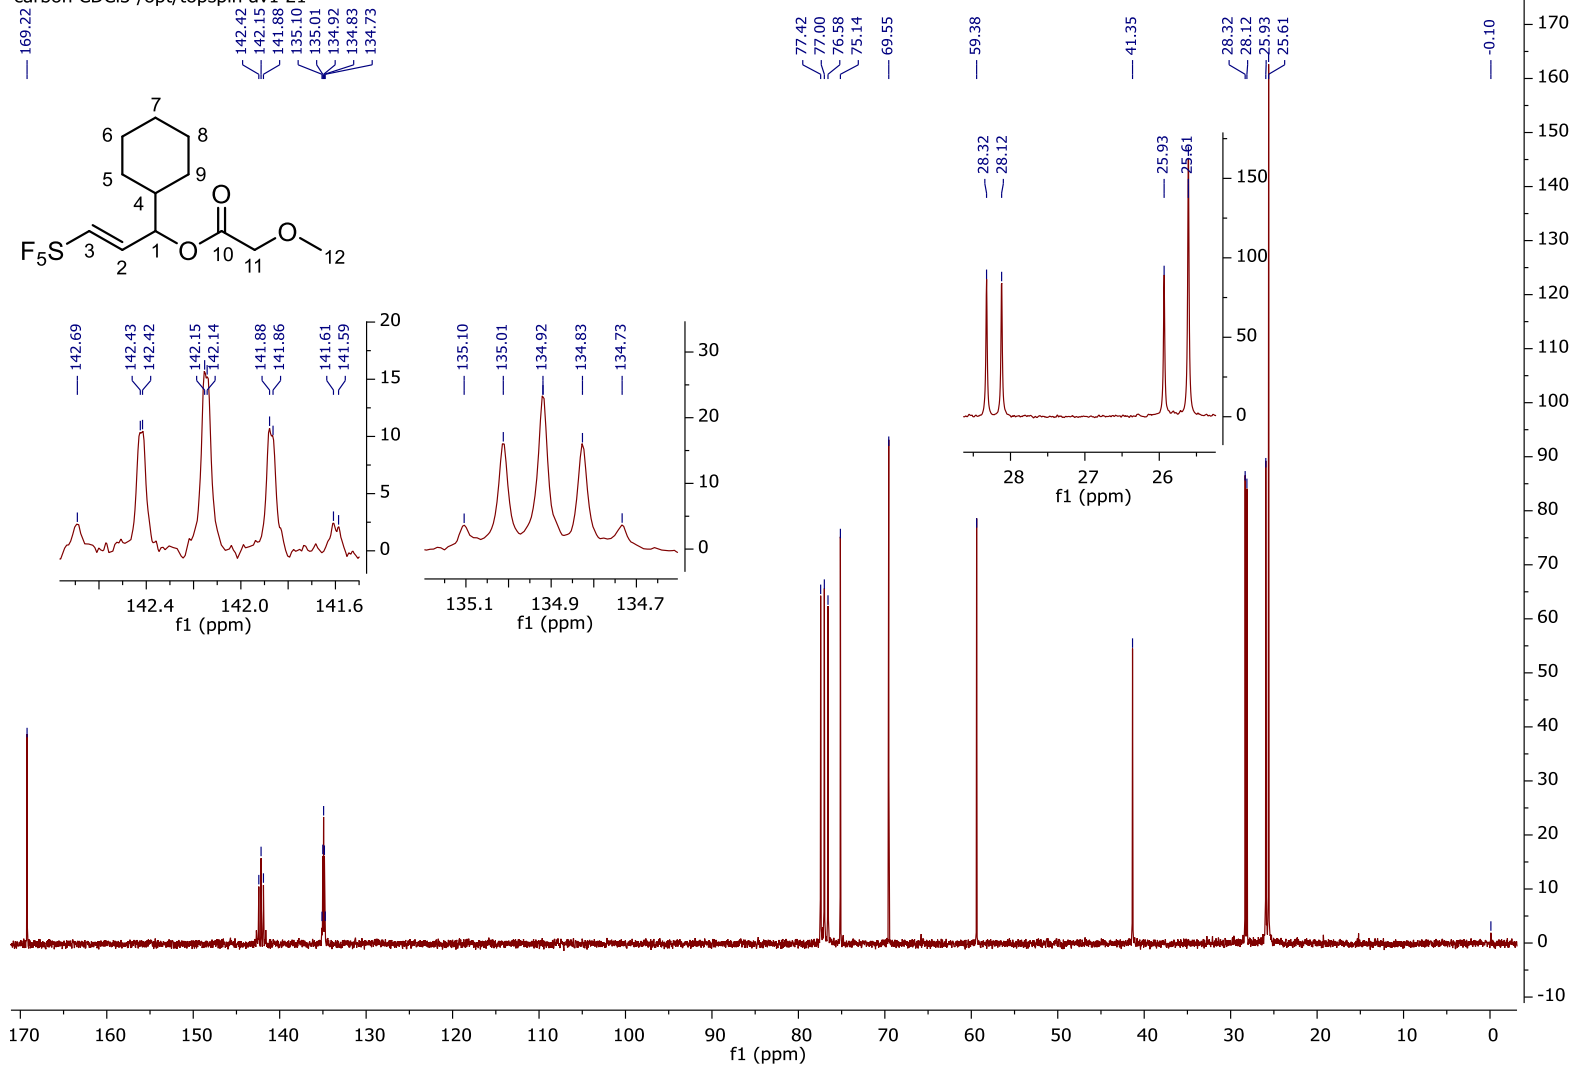

<sup>19</sup>F NMR spectrum of compound **4c**

Oct16-2008.244.fid  
Husstedt whu 93 a  
f19cpd CDCl3 /opt/topspin av1 34

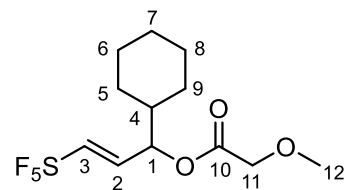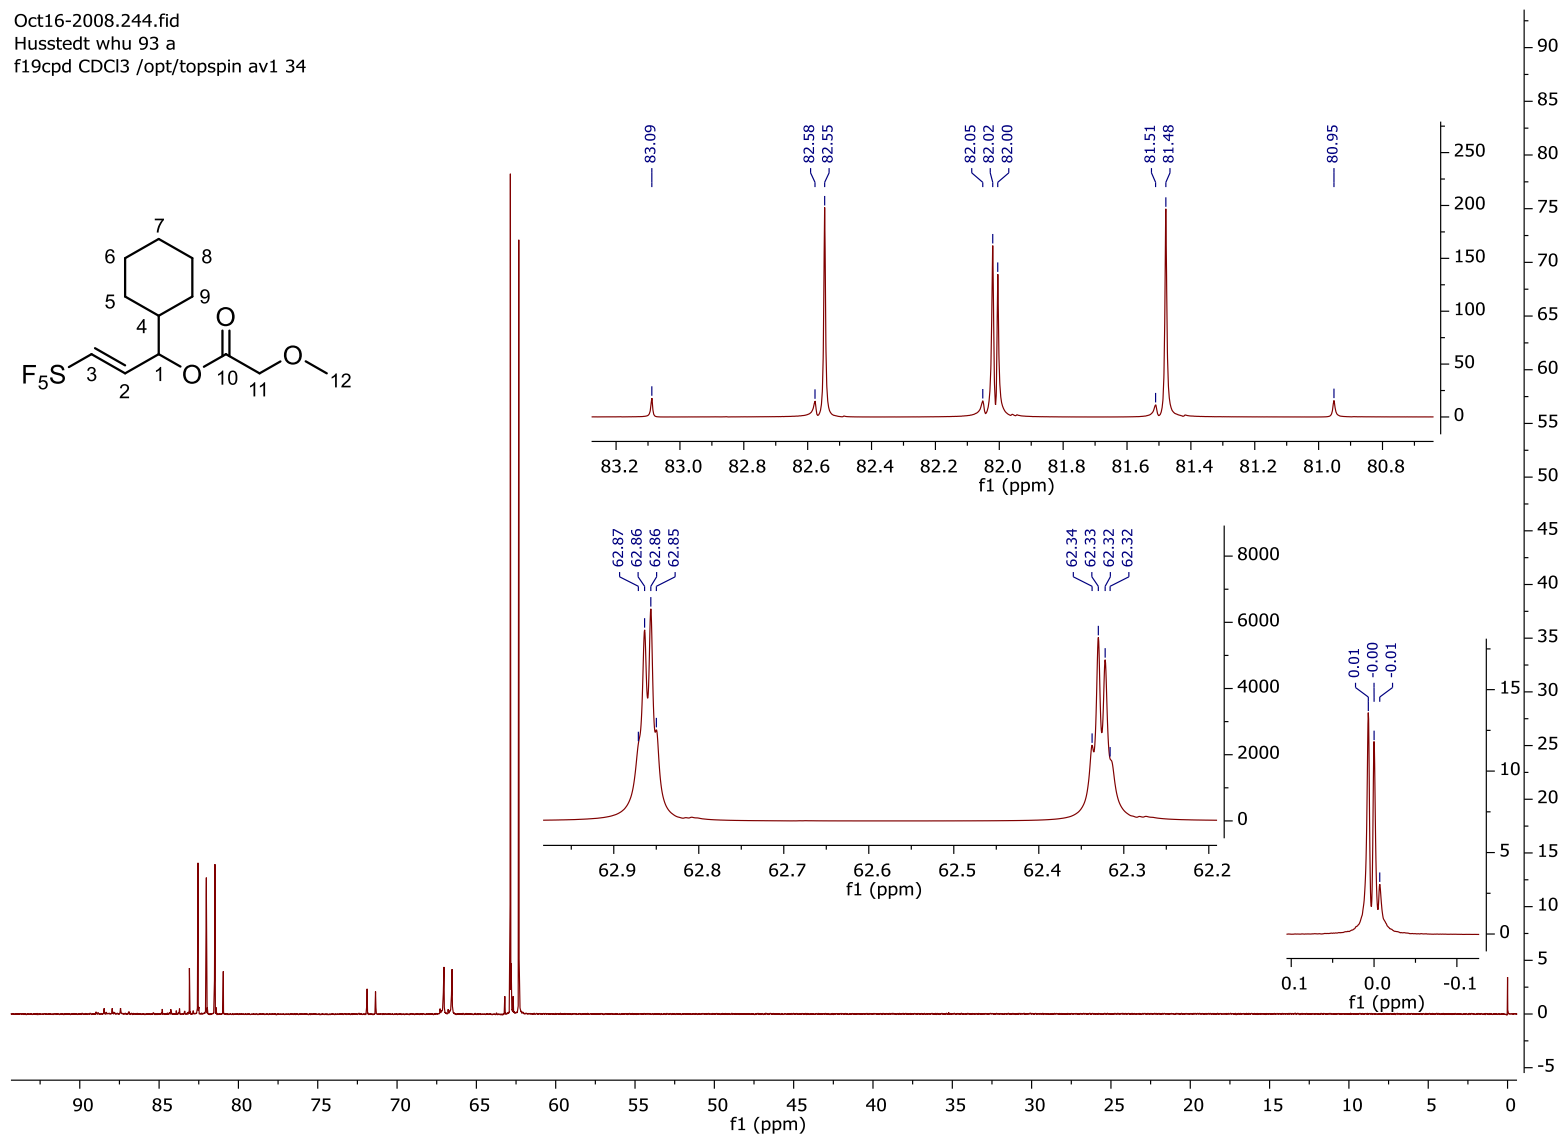

# <sup>1</sup>H NMR spectrum of compound 4d

Jan29-2008.290.fid  
husstedt whu 53a  
proton CDCl3 /opt/topspin av1 5

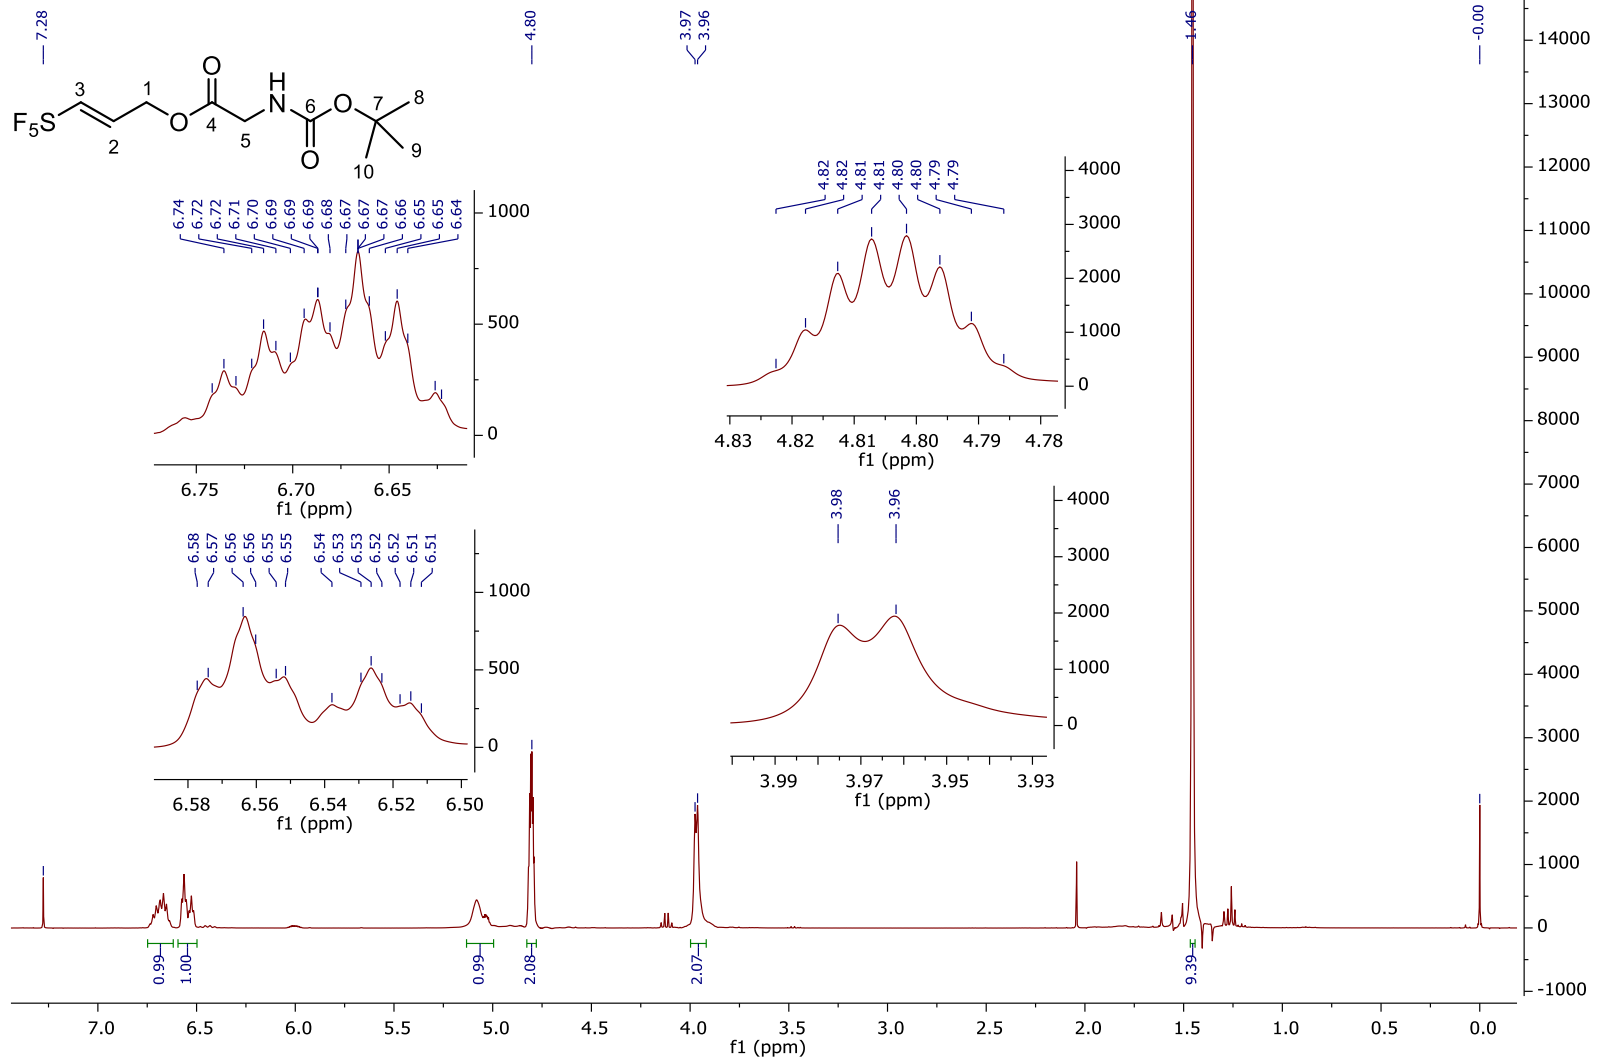

# <sup>13</sup>C NMR spectrum of compound 4d

Jan29-2008.291.fid  
husstedt whu 53a  
carbon CDCl<sub>3</sub> /opt/topspin av1 5

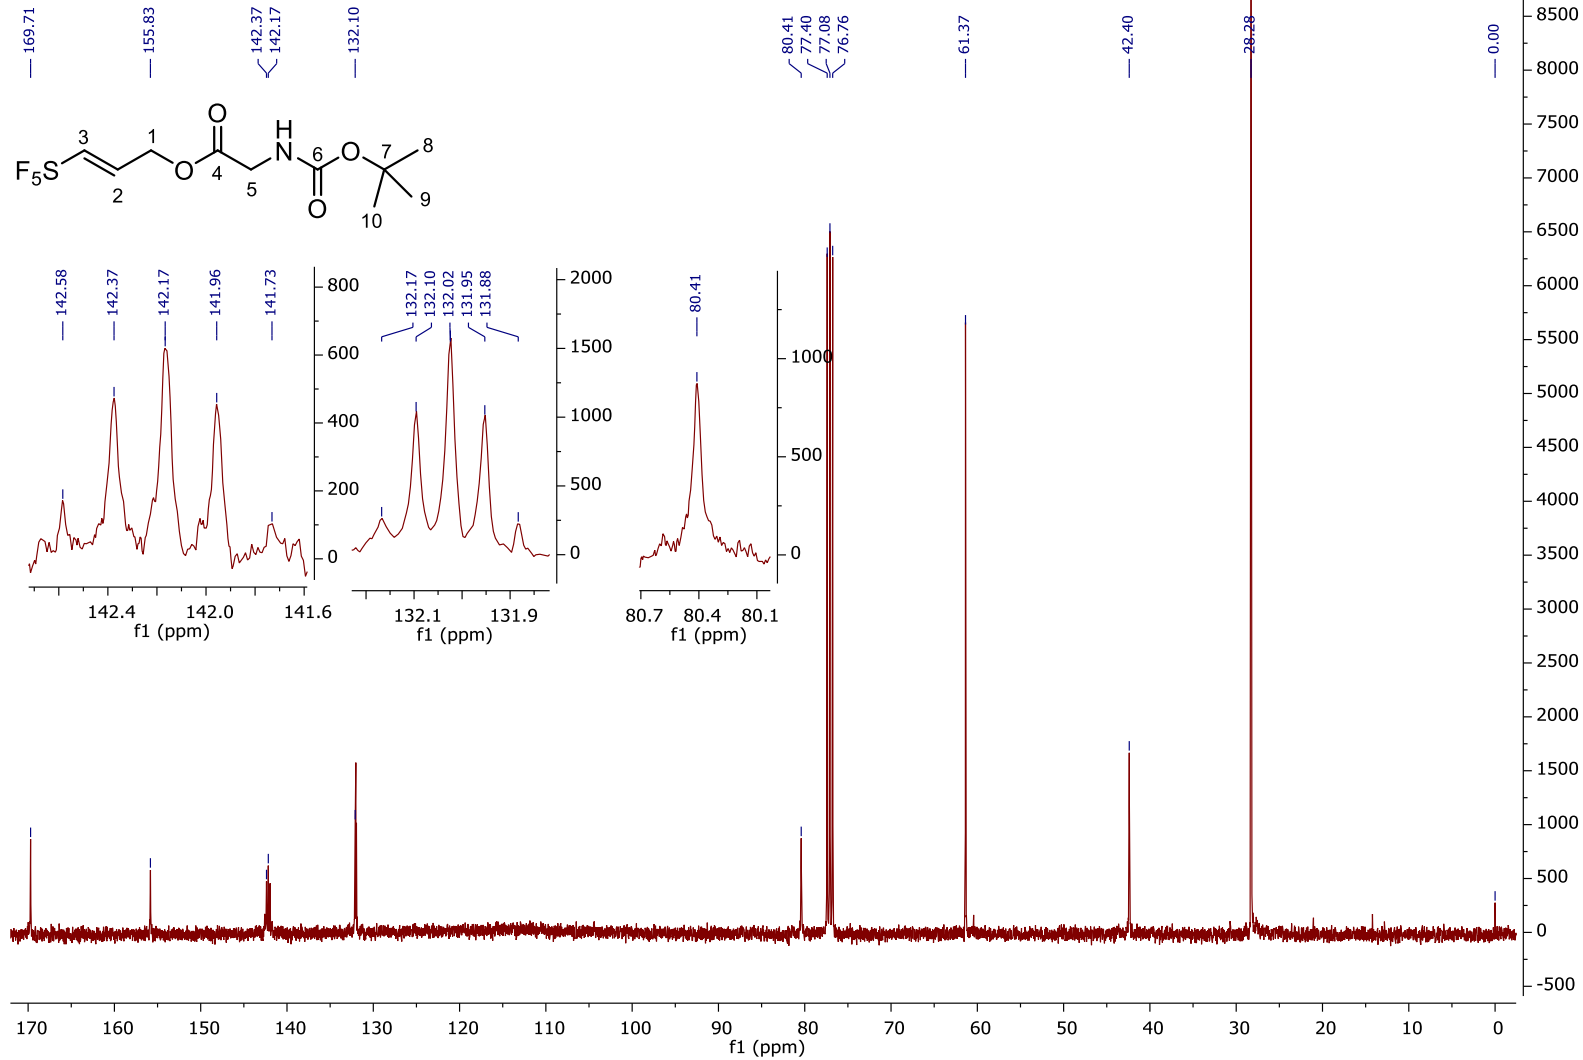

<sup>19</sup>F NMR spectrum of compound **4d**

Mar16-2008.92.fid  
husstedt whu 54 f  
f19cpd CDCl3 /opt/topspin av1 48

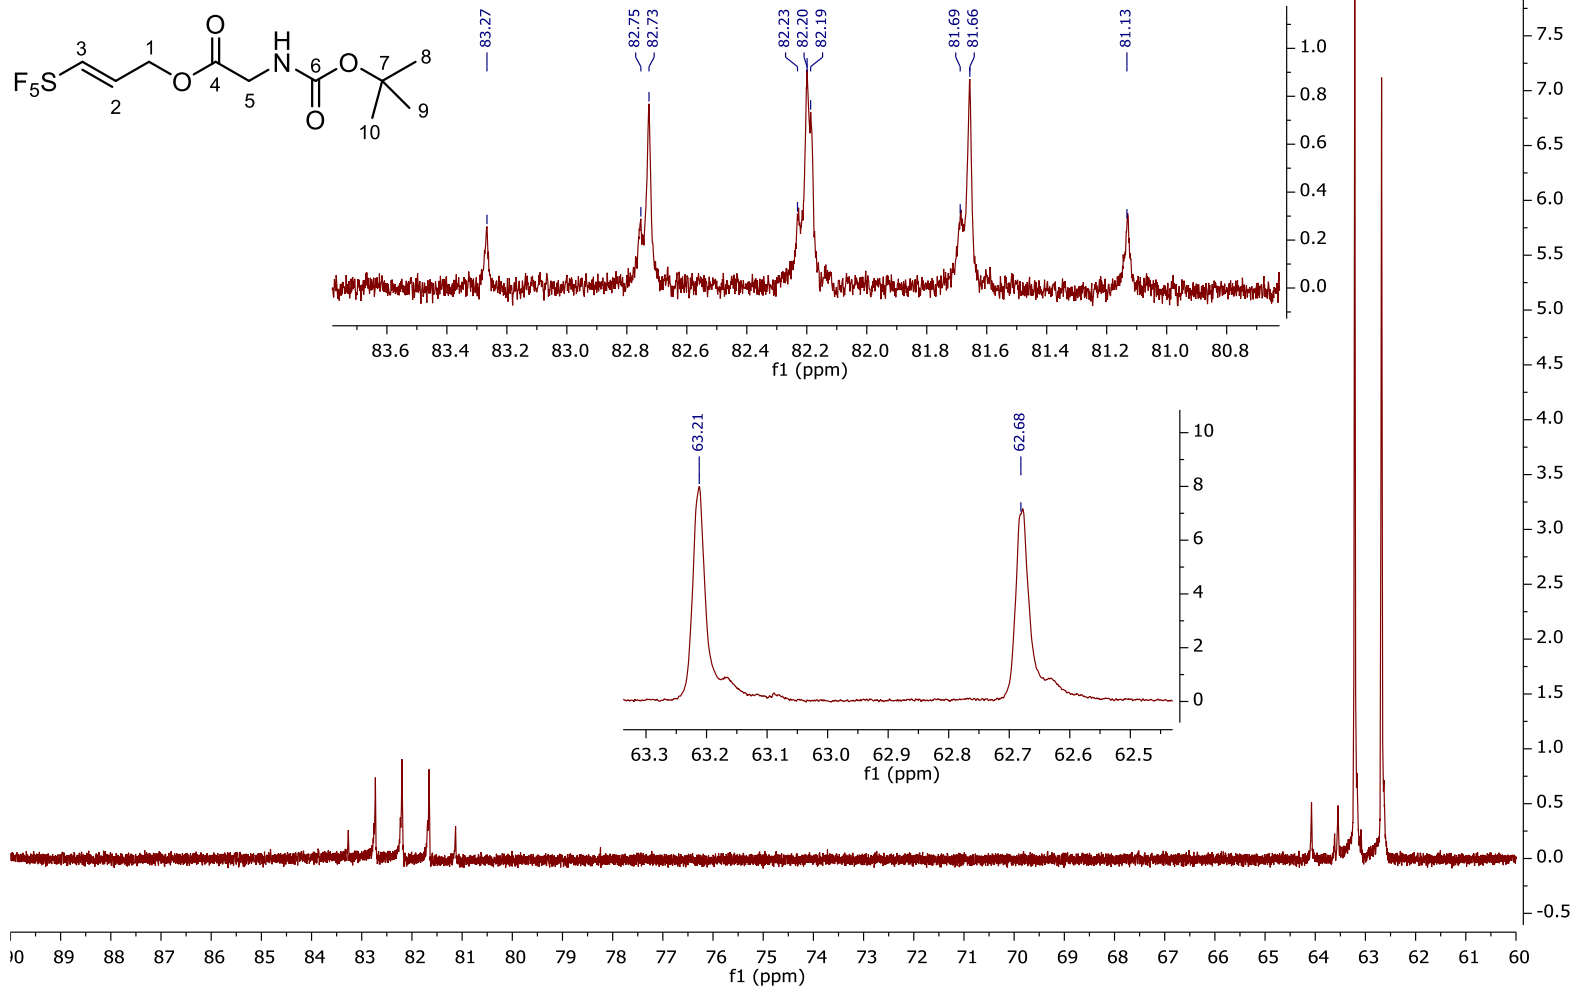



# <sup>1</sup>H NMR spectrum of compound **4e**

Jun23-2008.390.fid  
husstedt whu 60 d  
proton CDCl3 /opt/topspin av1 36

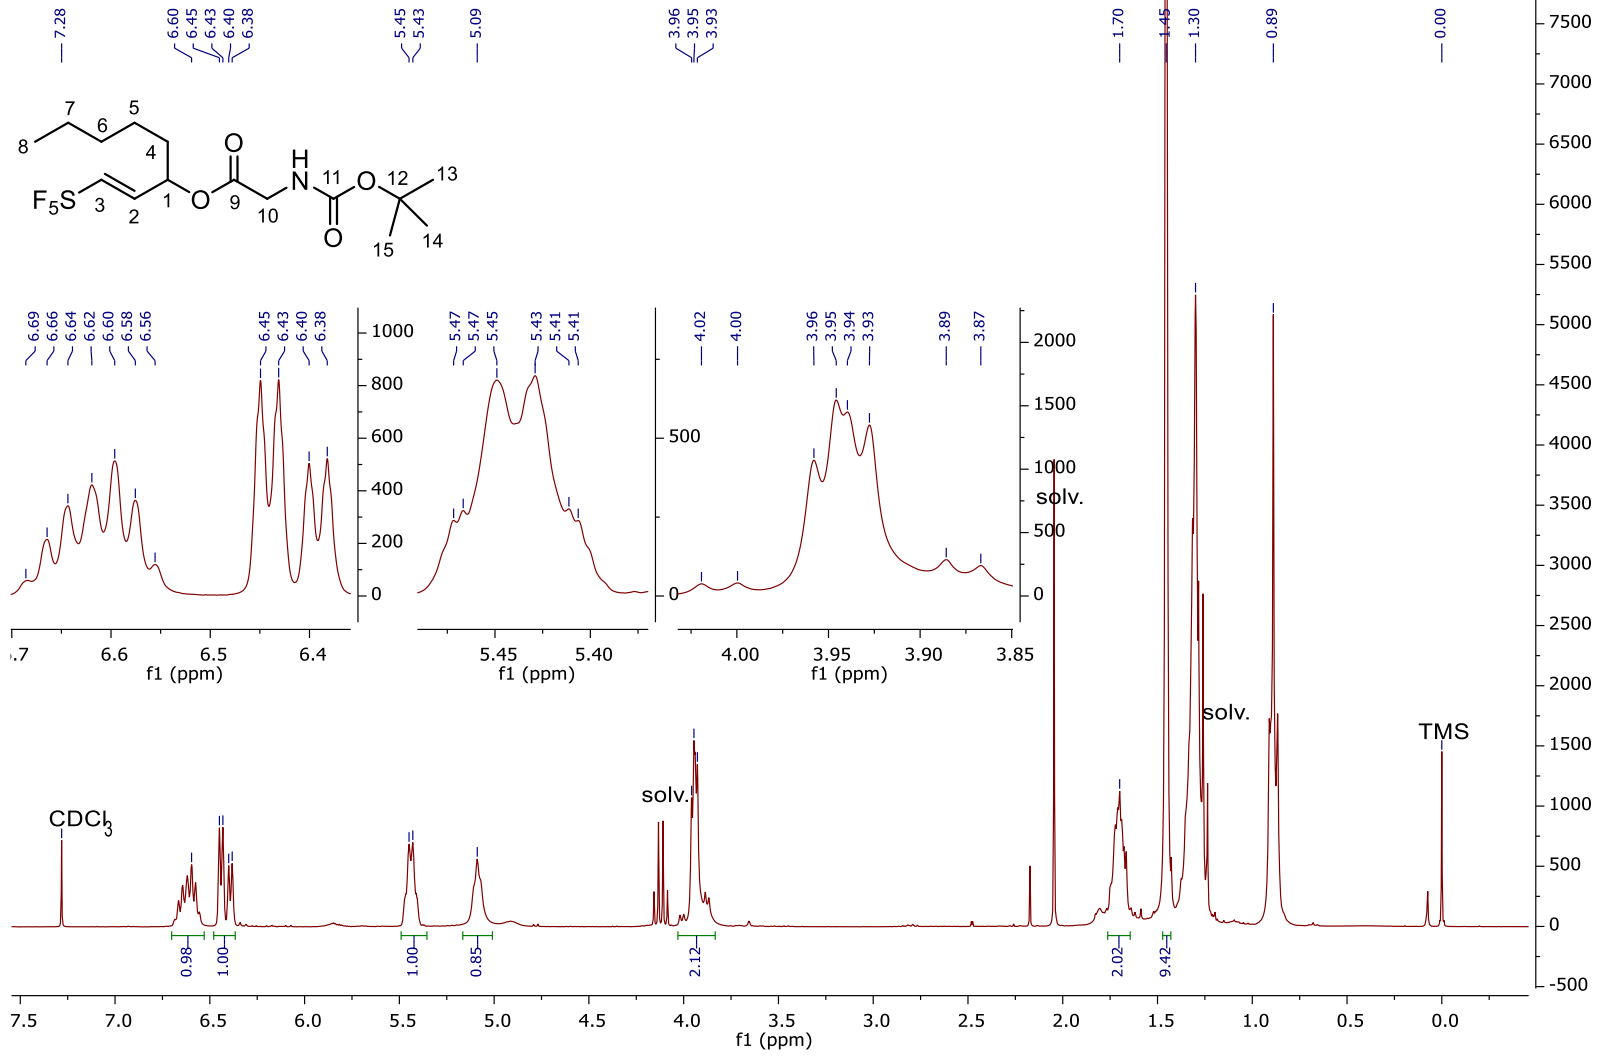

<sup>13</sup>C NMR spectrum of compound 4e

Jun23-2008.391.fid  
husstedt whu 60 d  
carbon CDCl<sub>3</sub> /opt/topspin av1 36

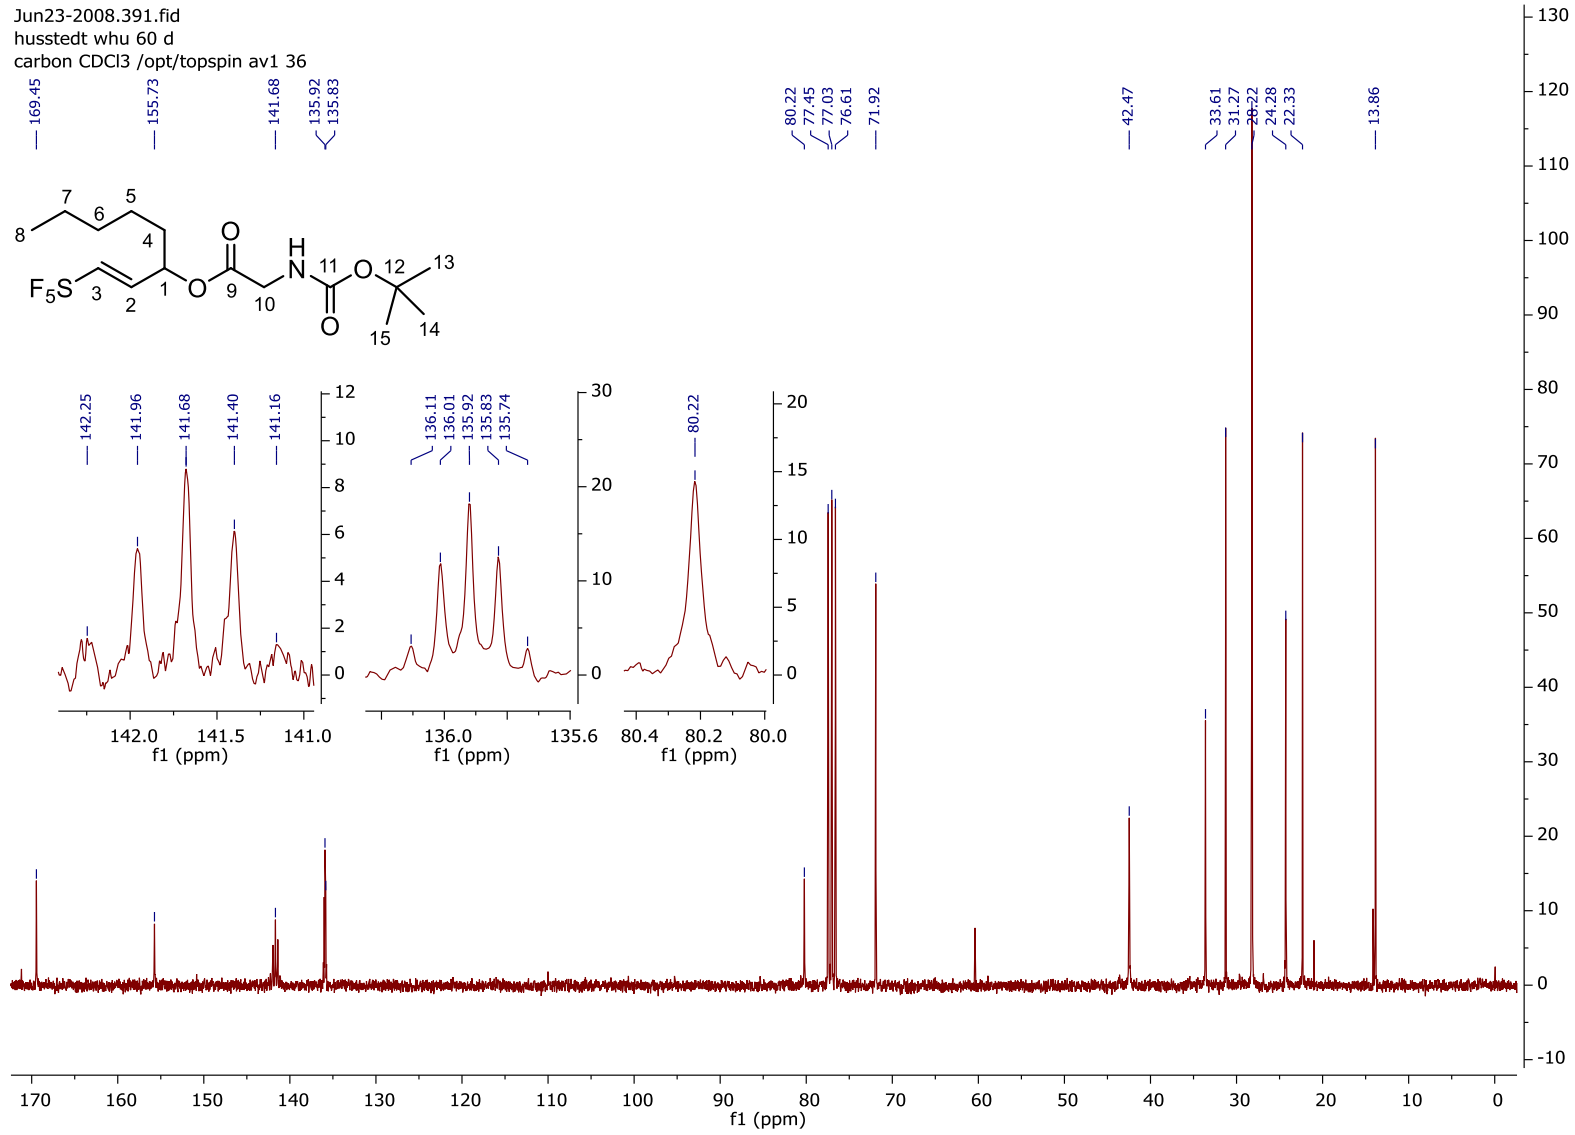

<sup>19</sup>F NMR spectrum of compound **4e**

Jun06-2008.381.fid  
Husstedt whu 61 c  
f19cpd Acetone /opt/topspin av1 55

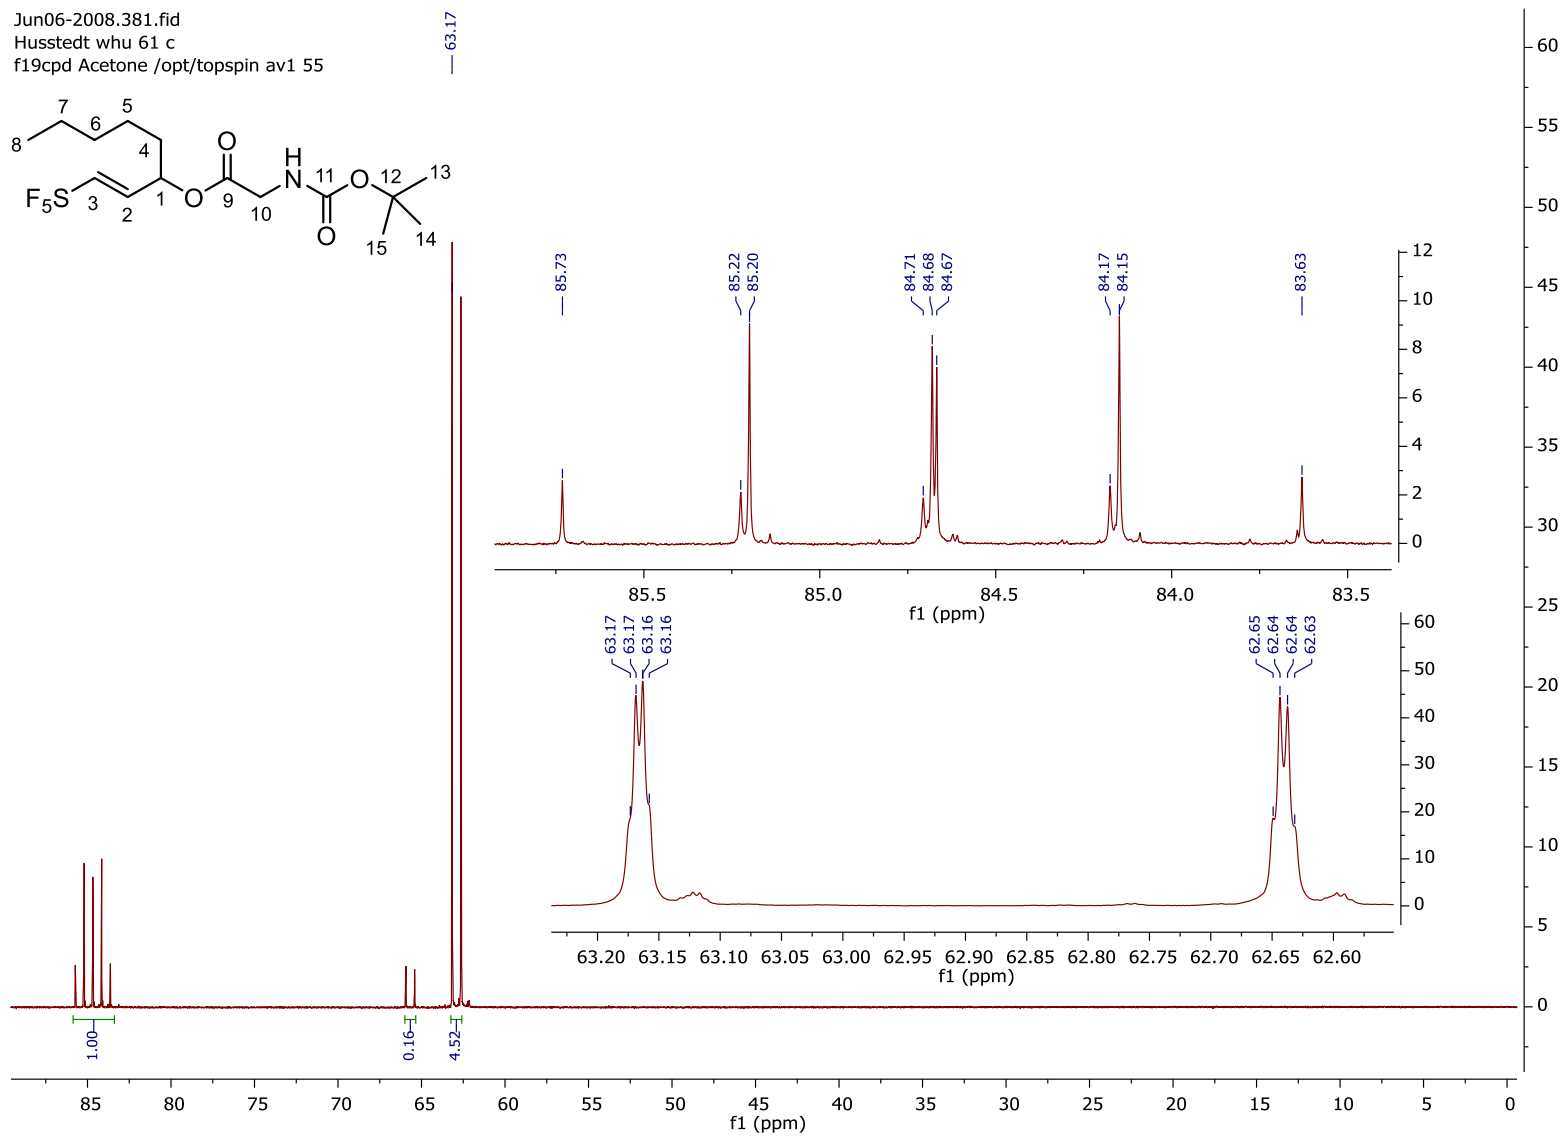

<sup>1</sup>H NMR spectrum of compound **4f**

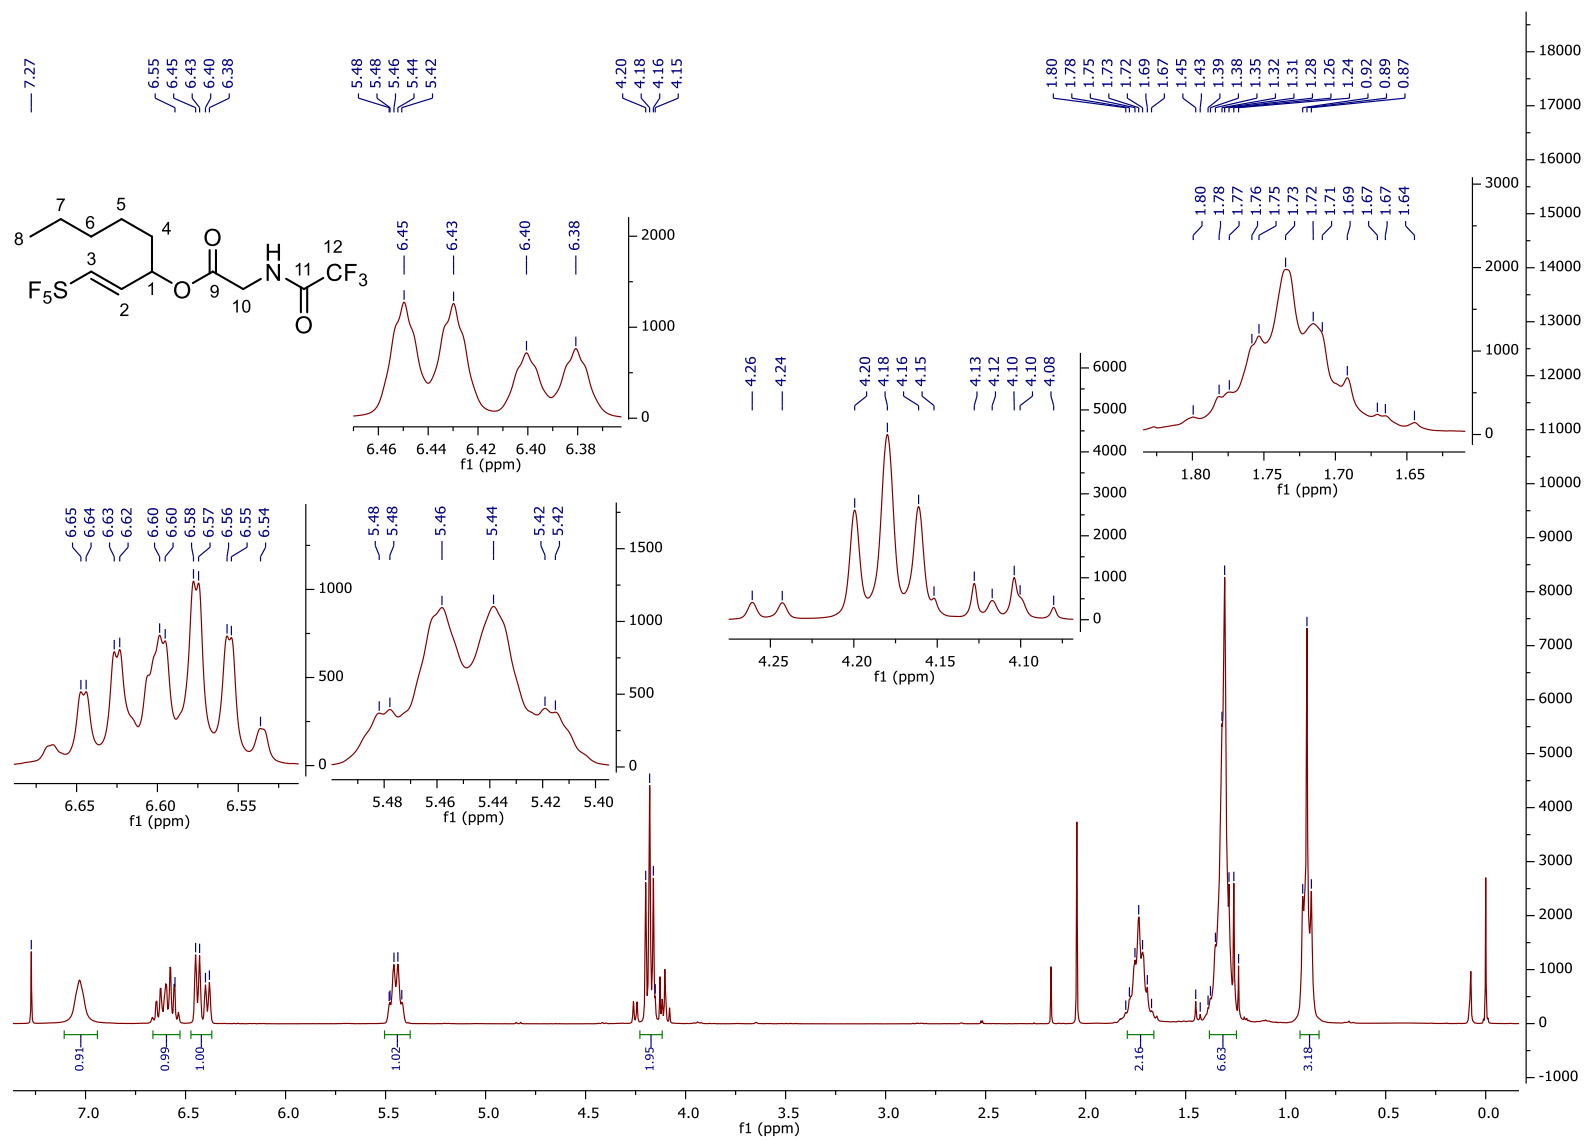

<sup>13</sup>C NMR spectrum of compound 4f

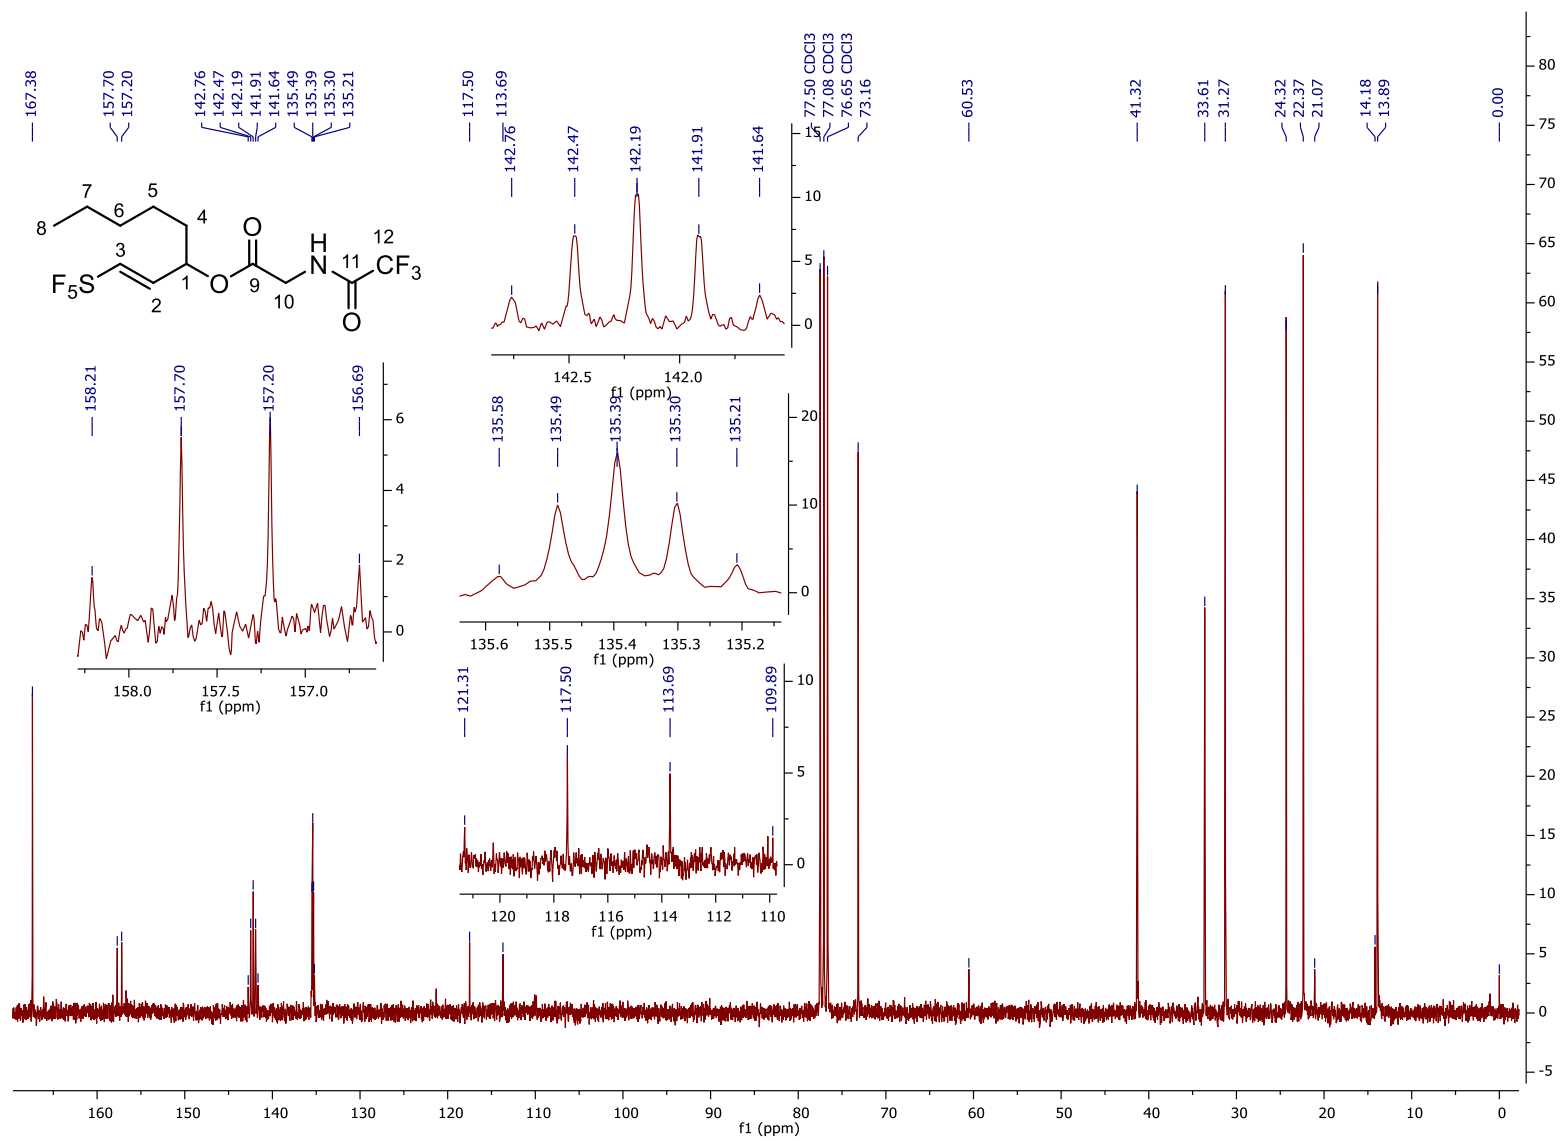

<sup>19</sup>F NMR spectrum of compound **4f**

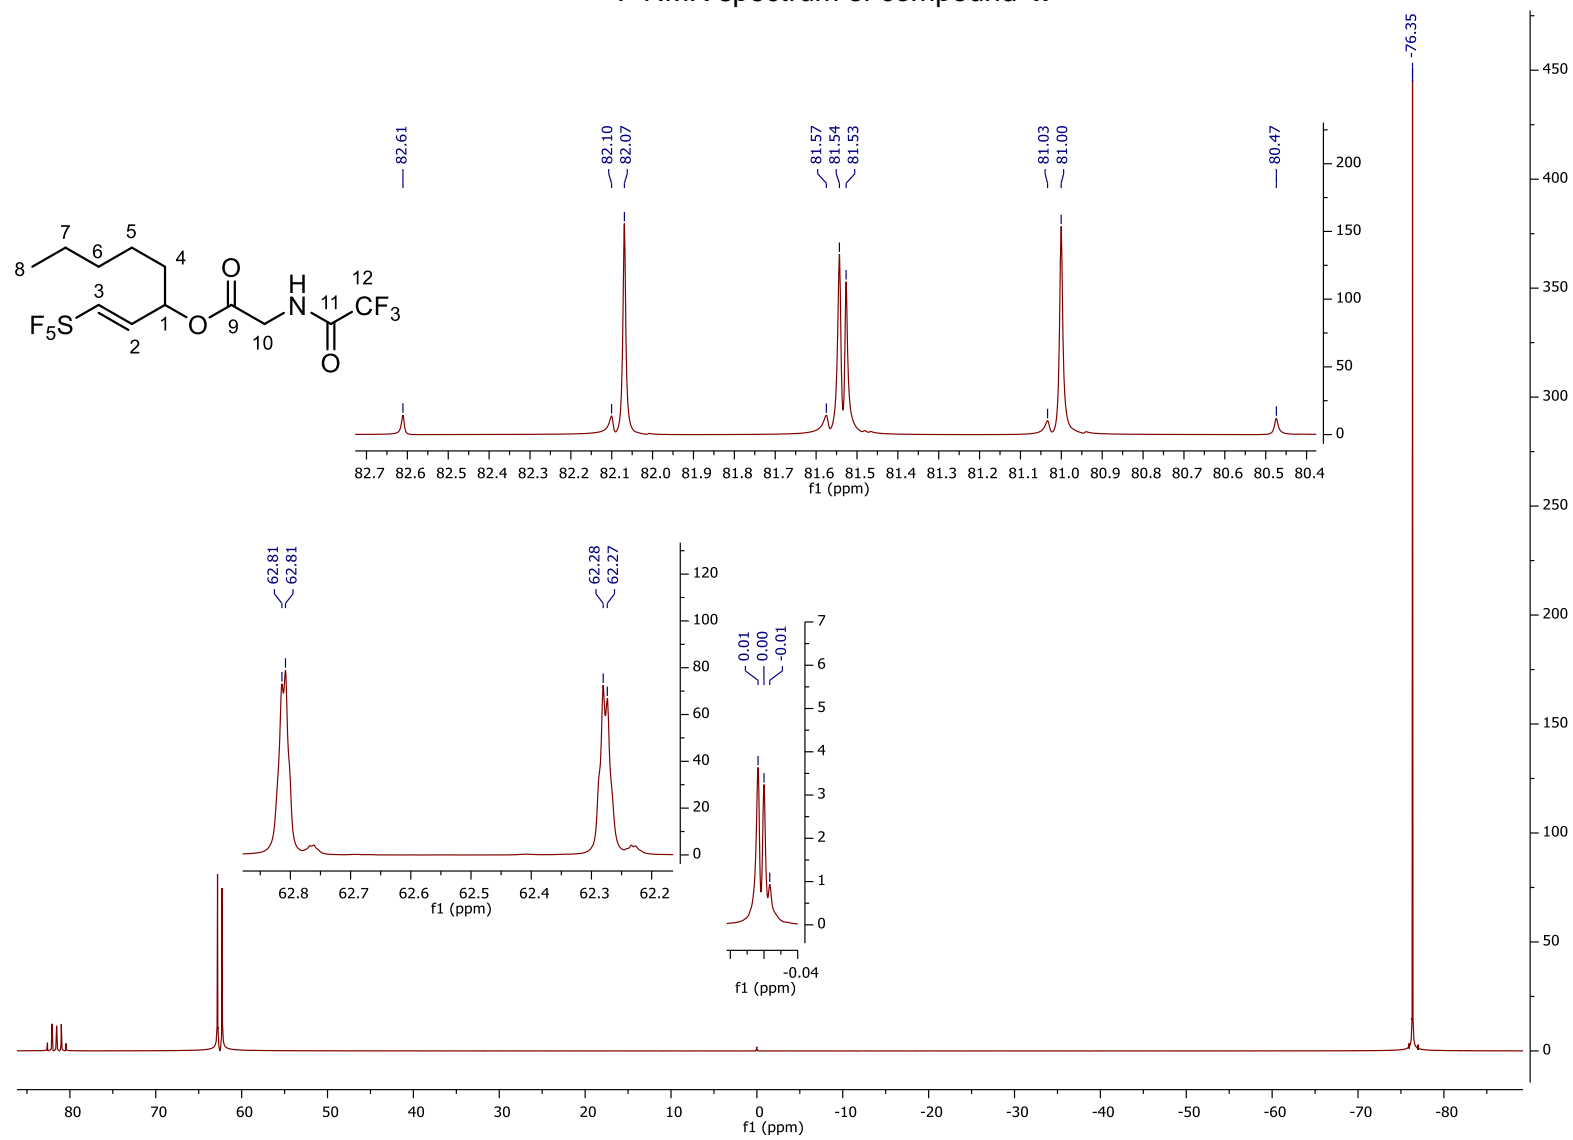

# <sup>1</sup>H NMR spectrum of compound 4g

Sep26-2008  
 husstedt whu 92a  
 proton CDCl<sub>3</sub> /opt/topspin av1 20

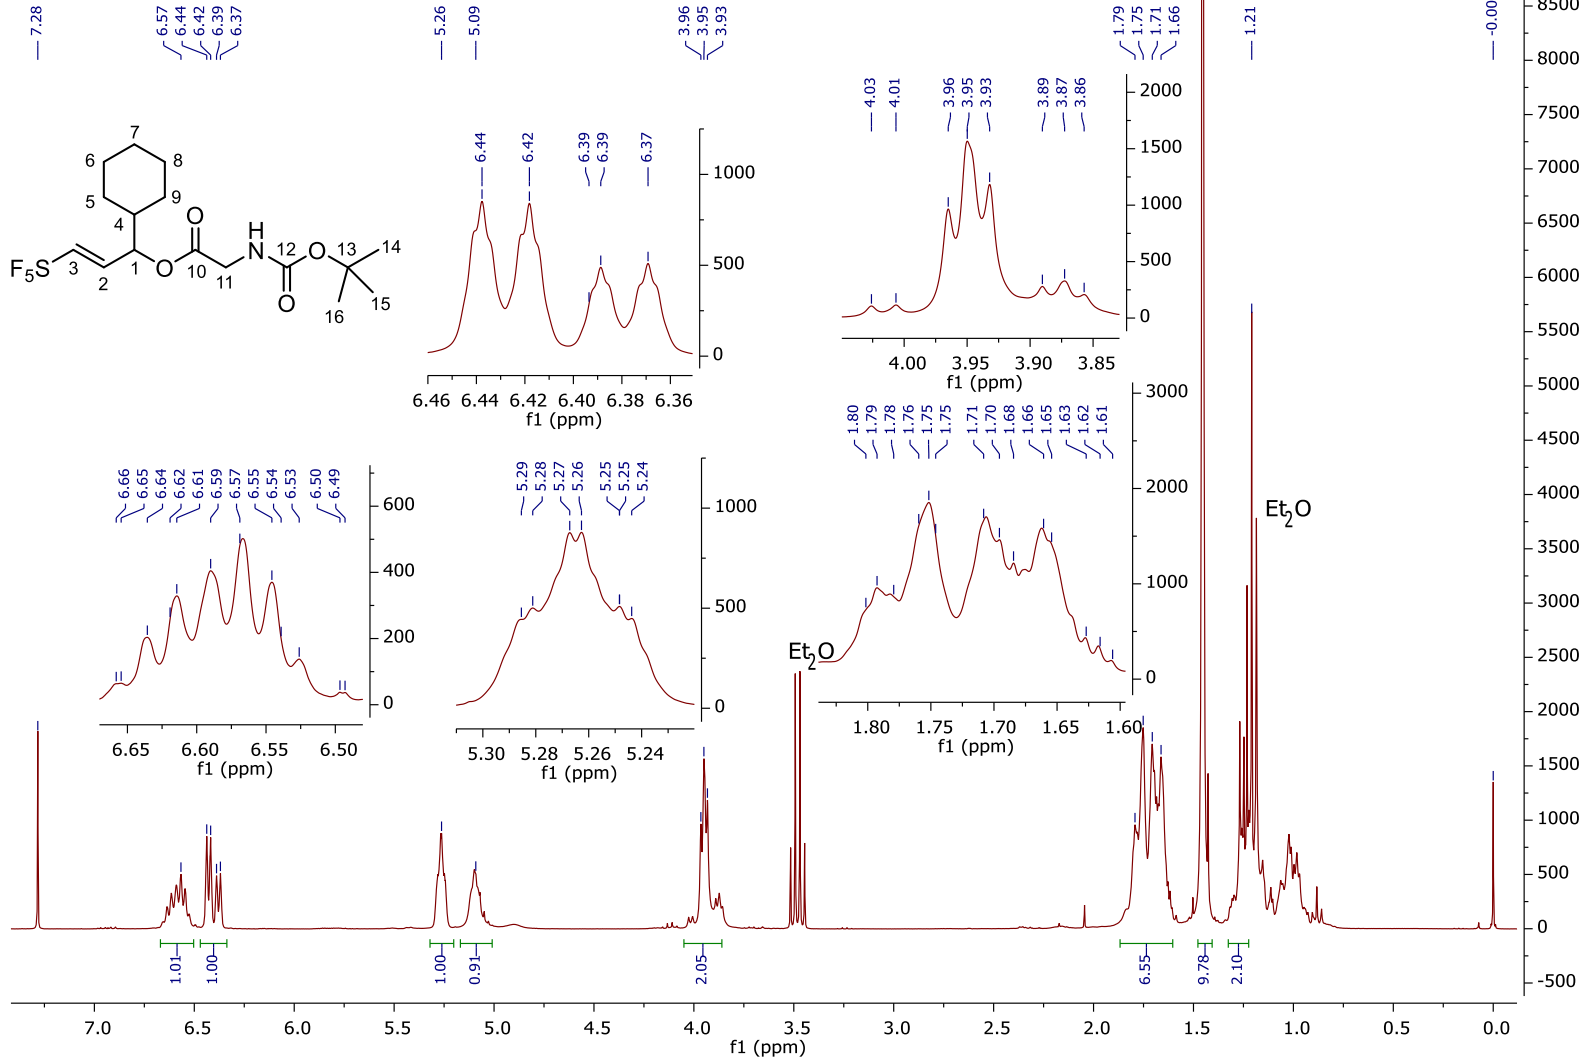

# <sup>13</sup>C NMR spectrum of compound **4g**

Sep26-2008  
husstedt whu 92a  
carbon CDCl<sub>3</sub> /opt/topspin av1.20

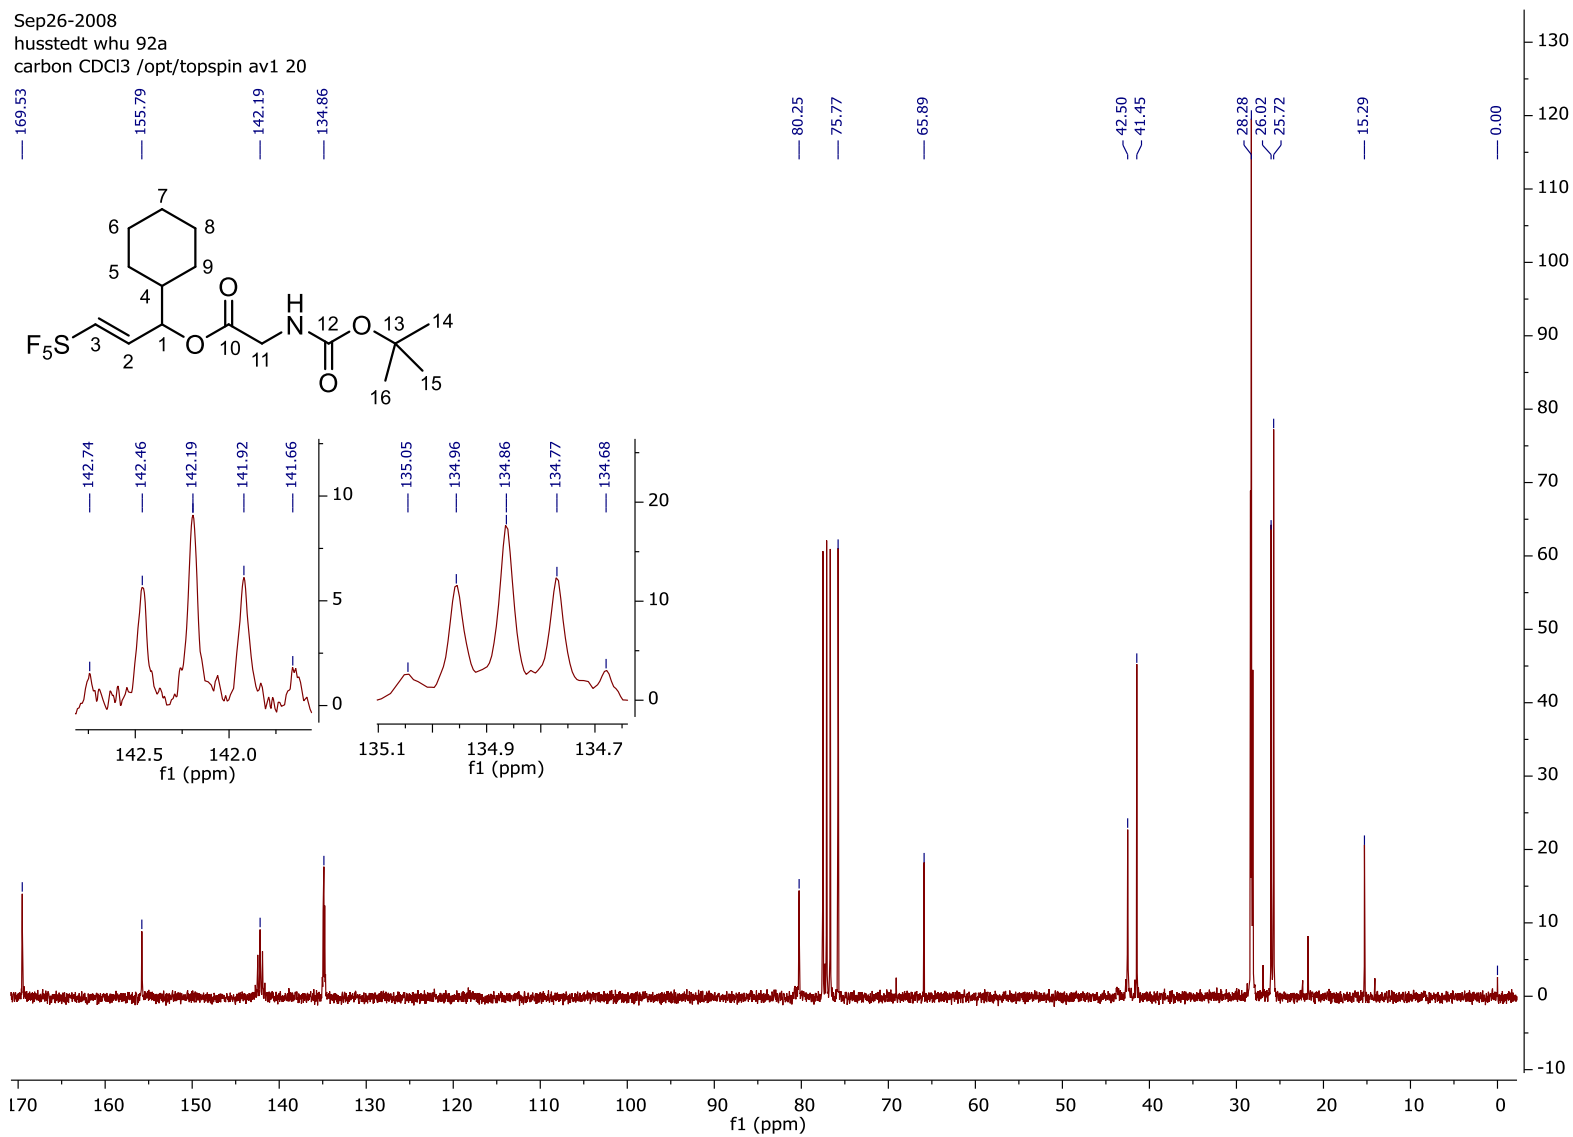



# <sup>19</sup>F NMR spectrum of compound **4g**

Oct09-2008.224.fid  
Husstedt whu 91 a  
f19cpd CDCl3 /opt/topspin av1 1

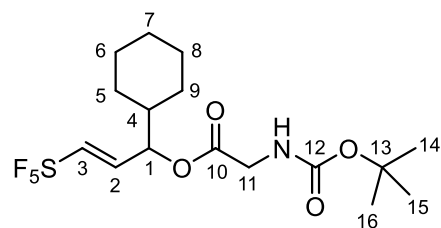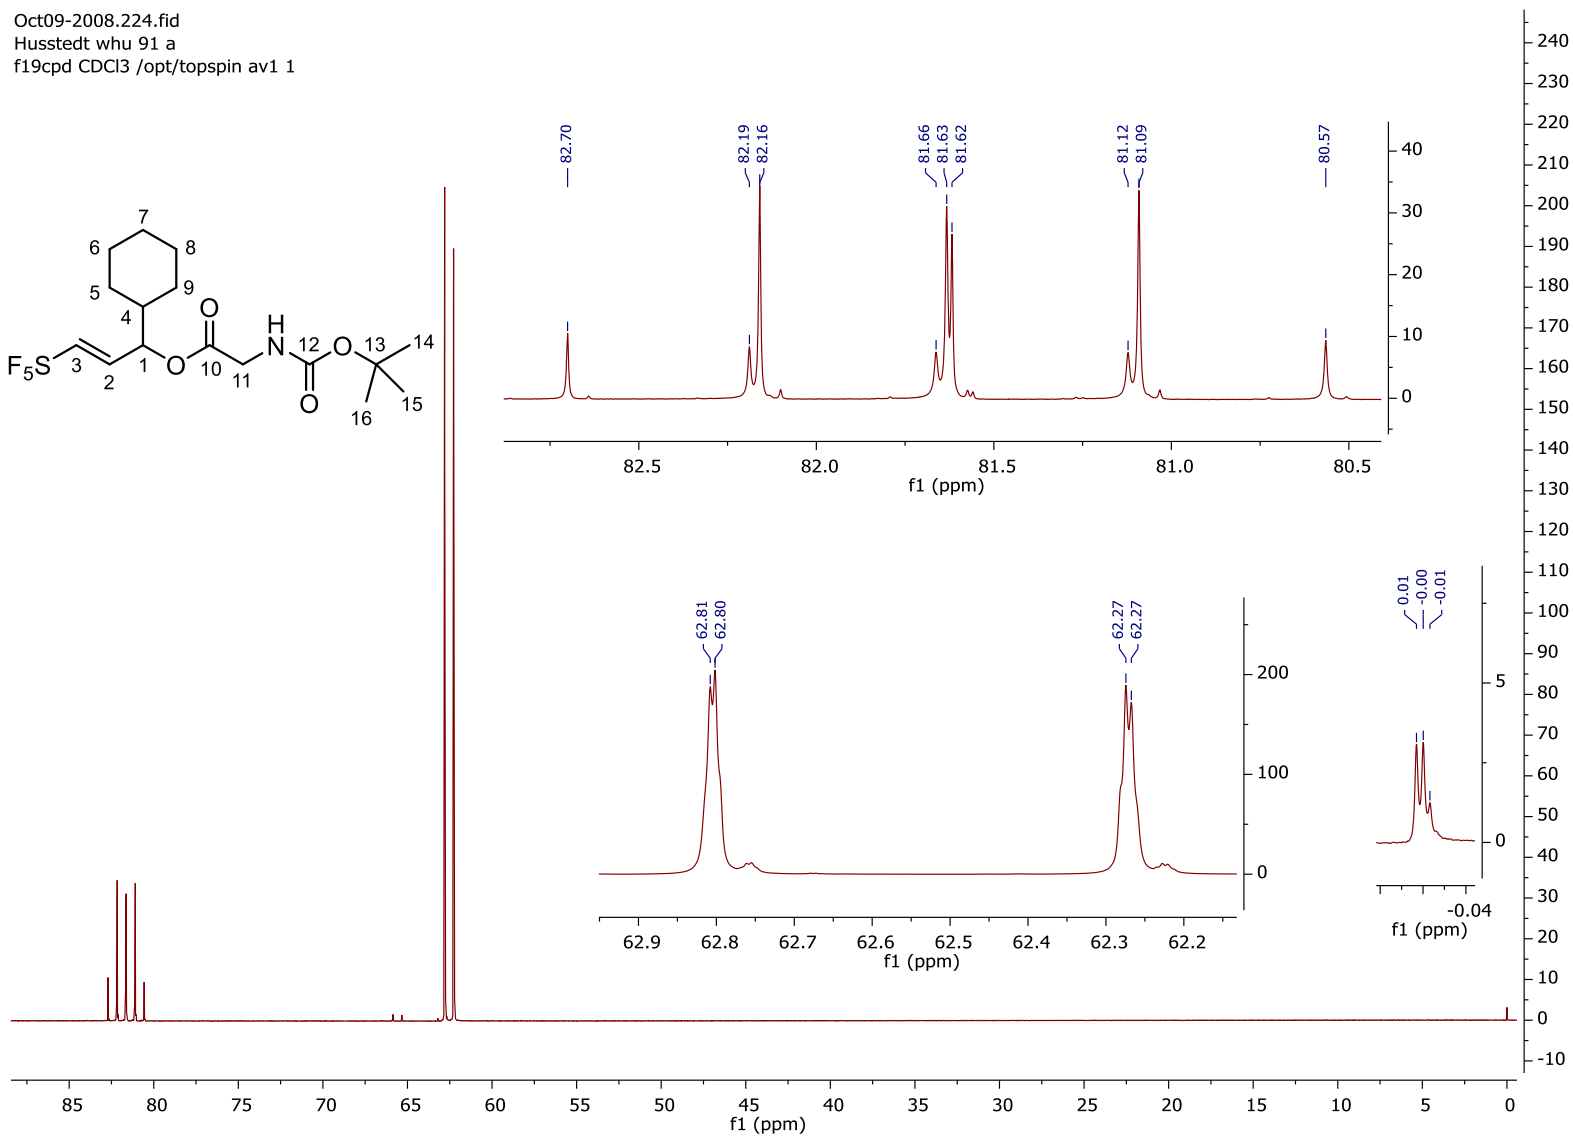

# <sup>1</sup>H NMR spectrum of compound 4h

Nov05-2008  
 Husstedt whu 98 A  
 proton CDCl<sub>3</sub> /opt/topspin av1 39

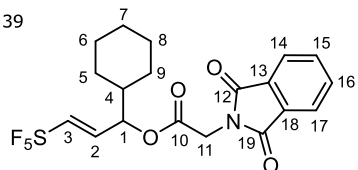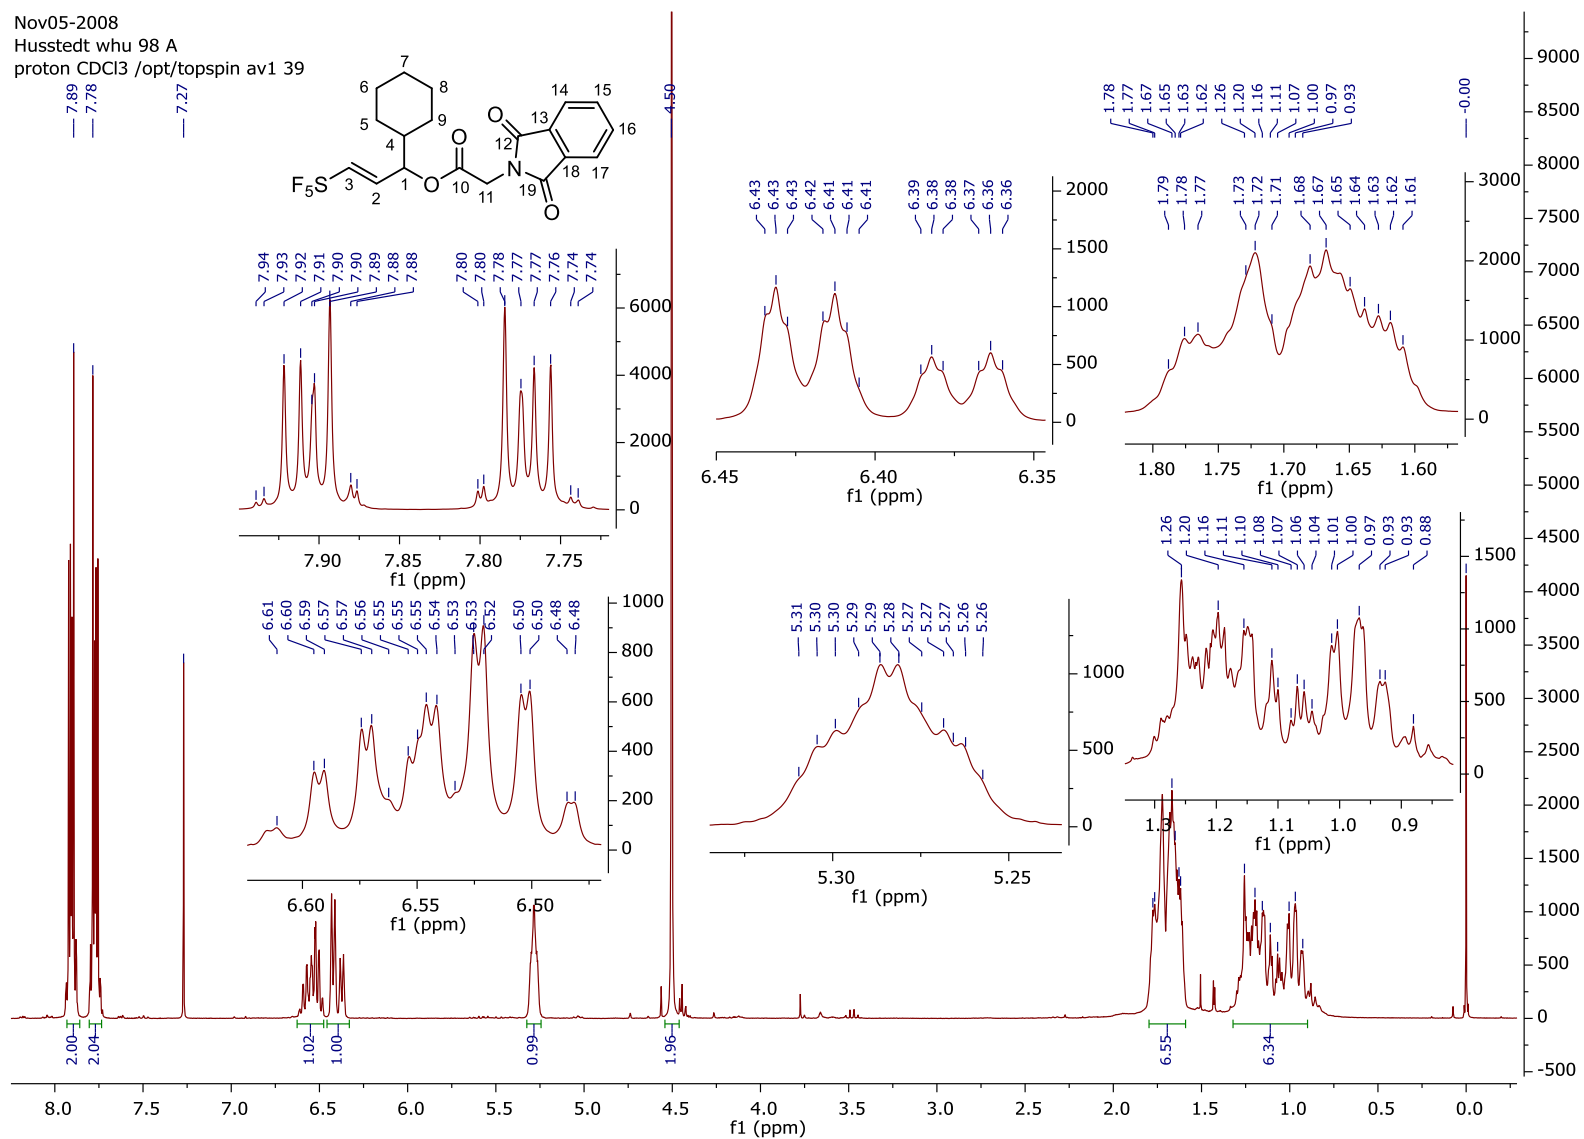

# <sup>13</sup>C NMR spectrum of compound 4h

Nov05-2008  
Husstedt whu 98 A  
carbon CDCl<sub>3</sub> /opt/topspin av1 39

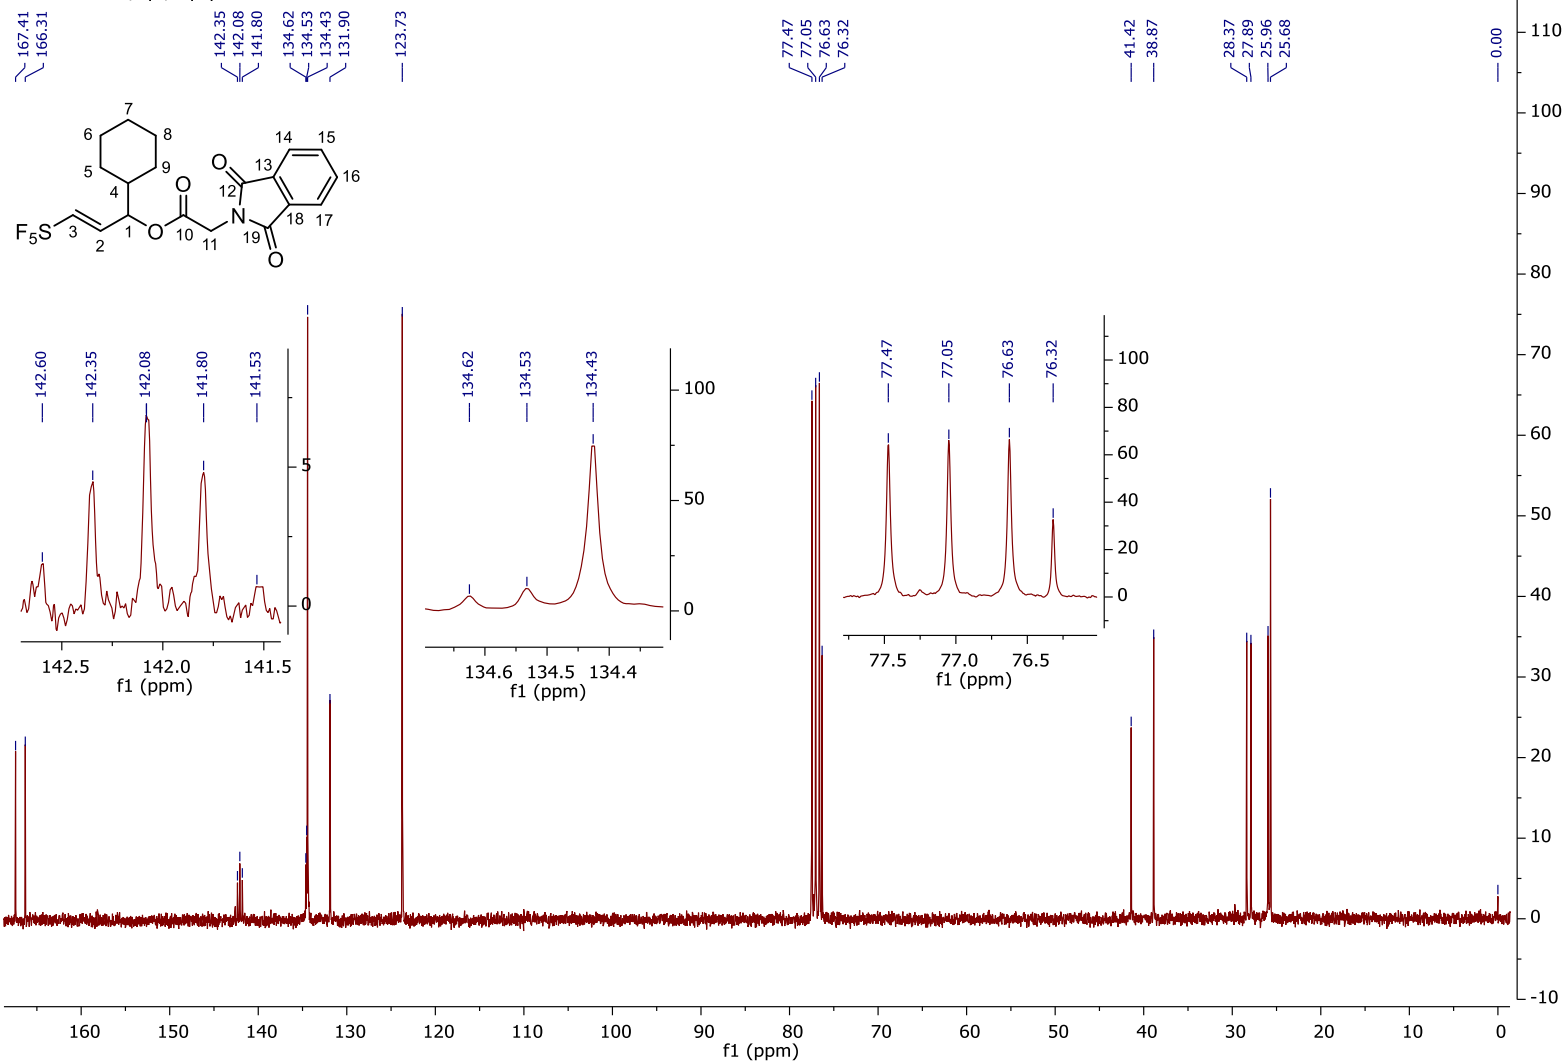

# <sup>19</sup>F NMR spectrum of compound 4h

Nov05-2008  
Husstedt whu 98 A  
f19cpd CDCl3 /opt/topspin av1 39

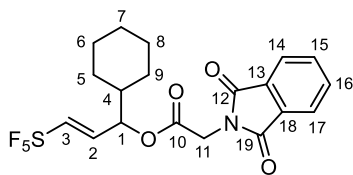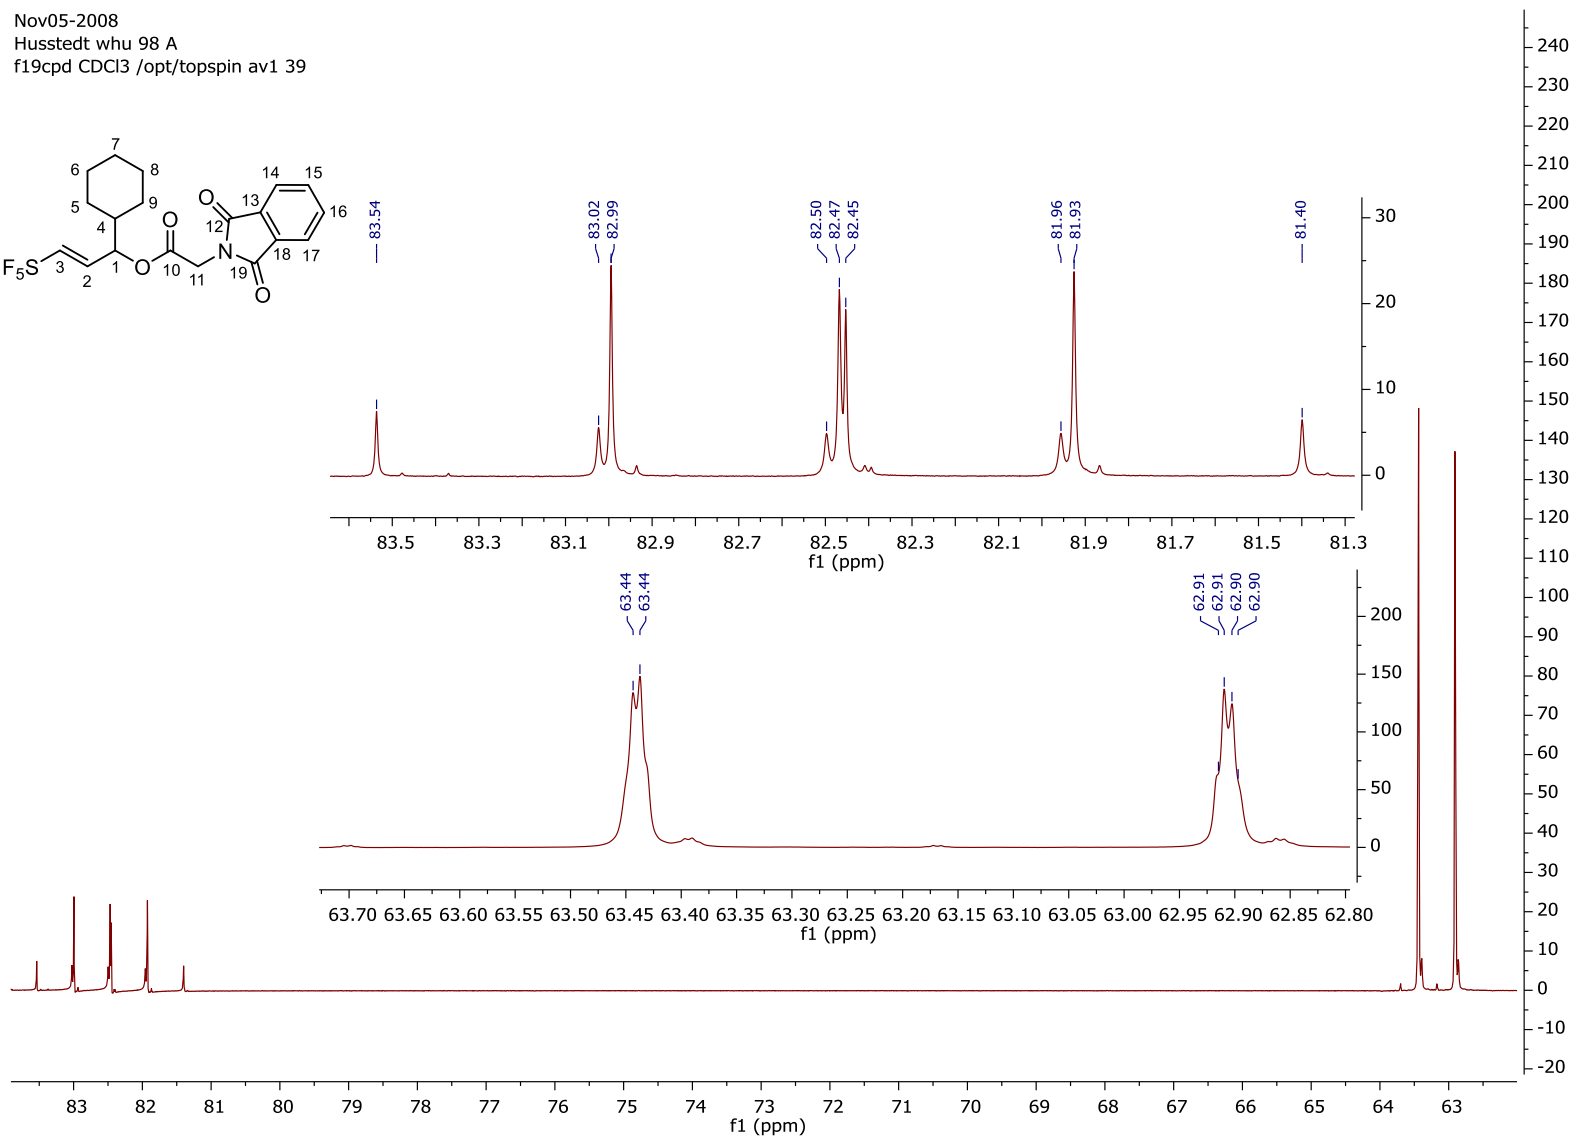

# <sup>1</sup>H NMR spectrum of compound 4i

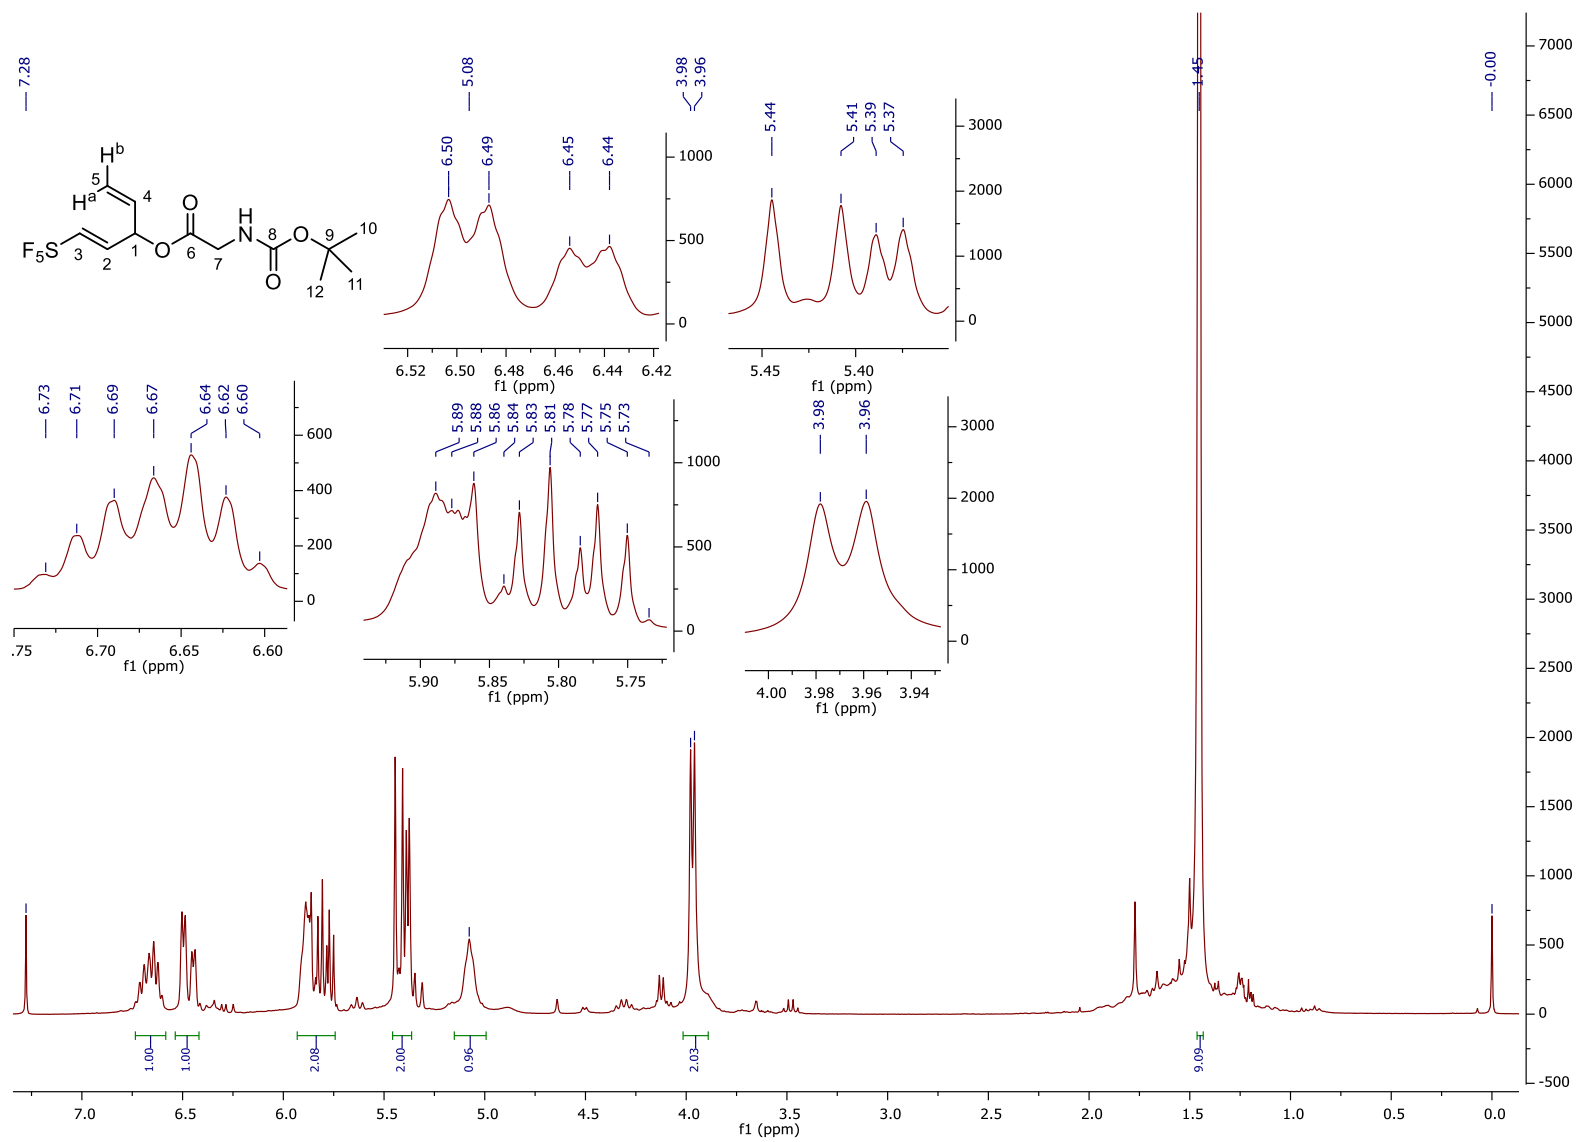

<sup>13</sup>C NMR spectrum of compound **4i**

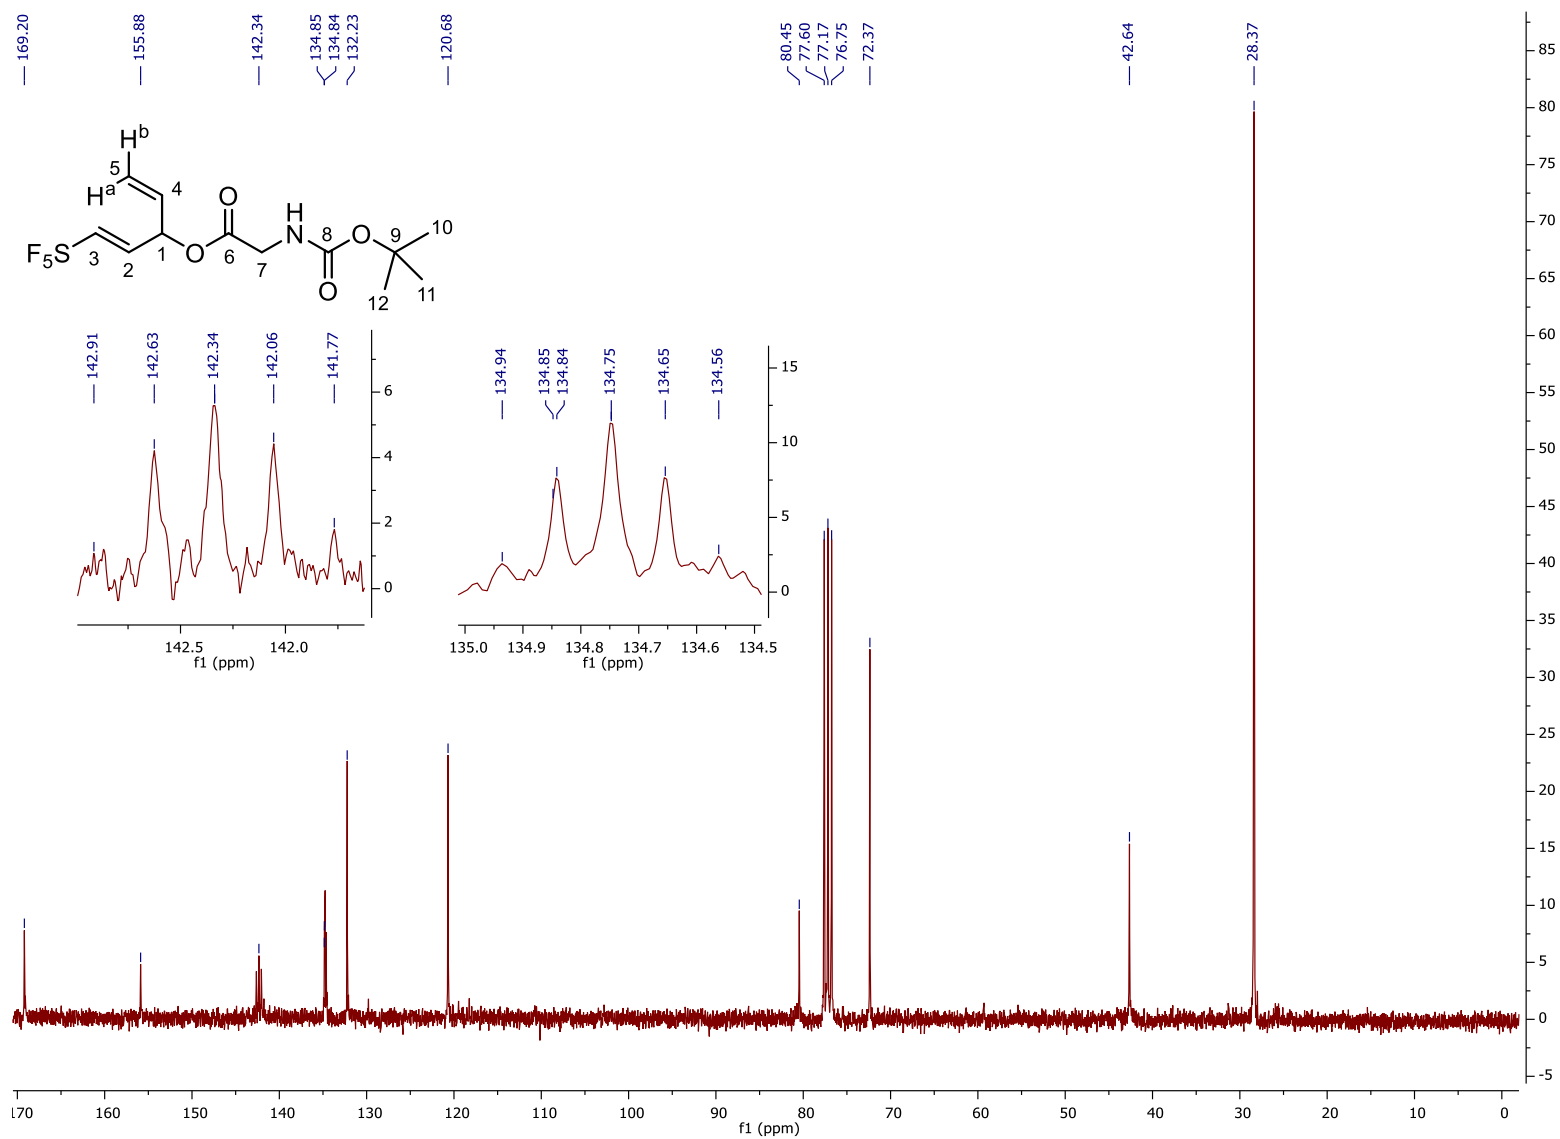

<sup>19</sup>F NMR spectrum of compound **4i**

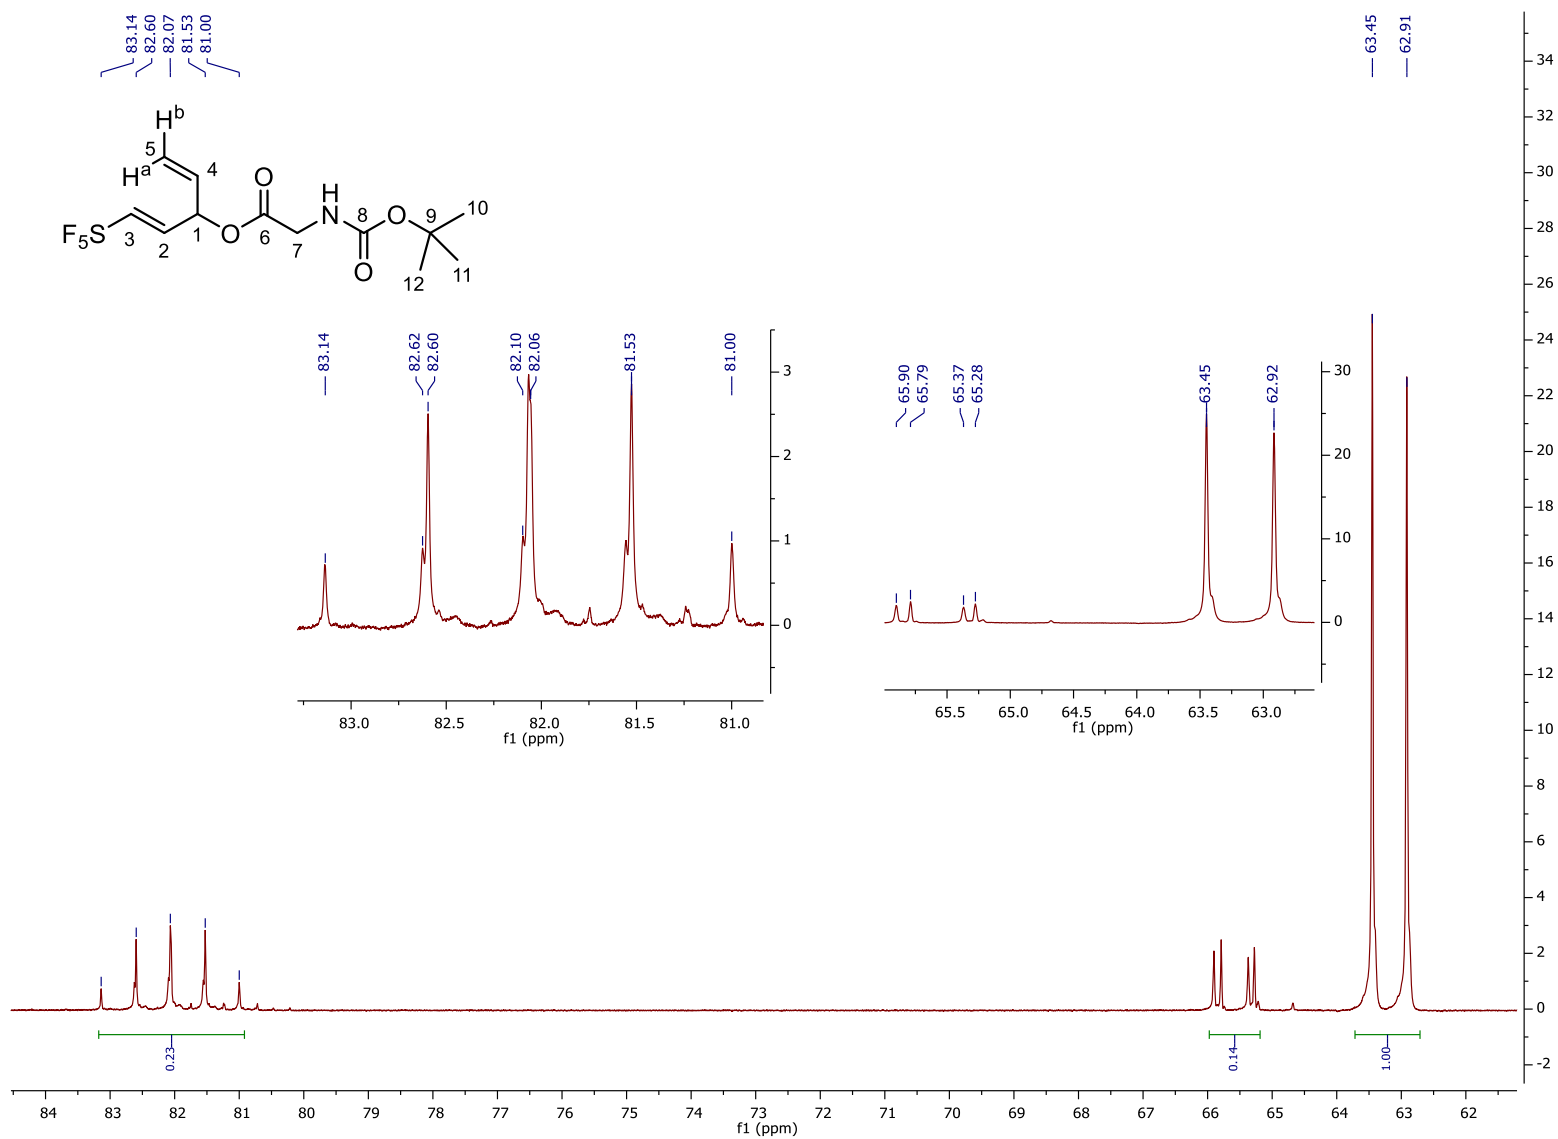

# <sup>1</sup>H NMR spectrum of compound 6

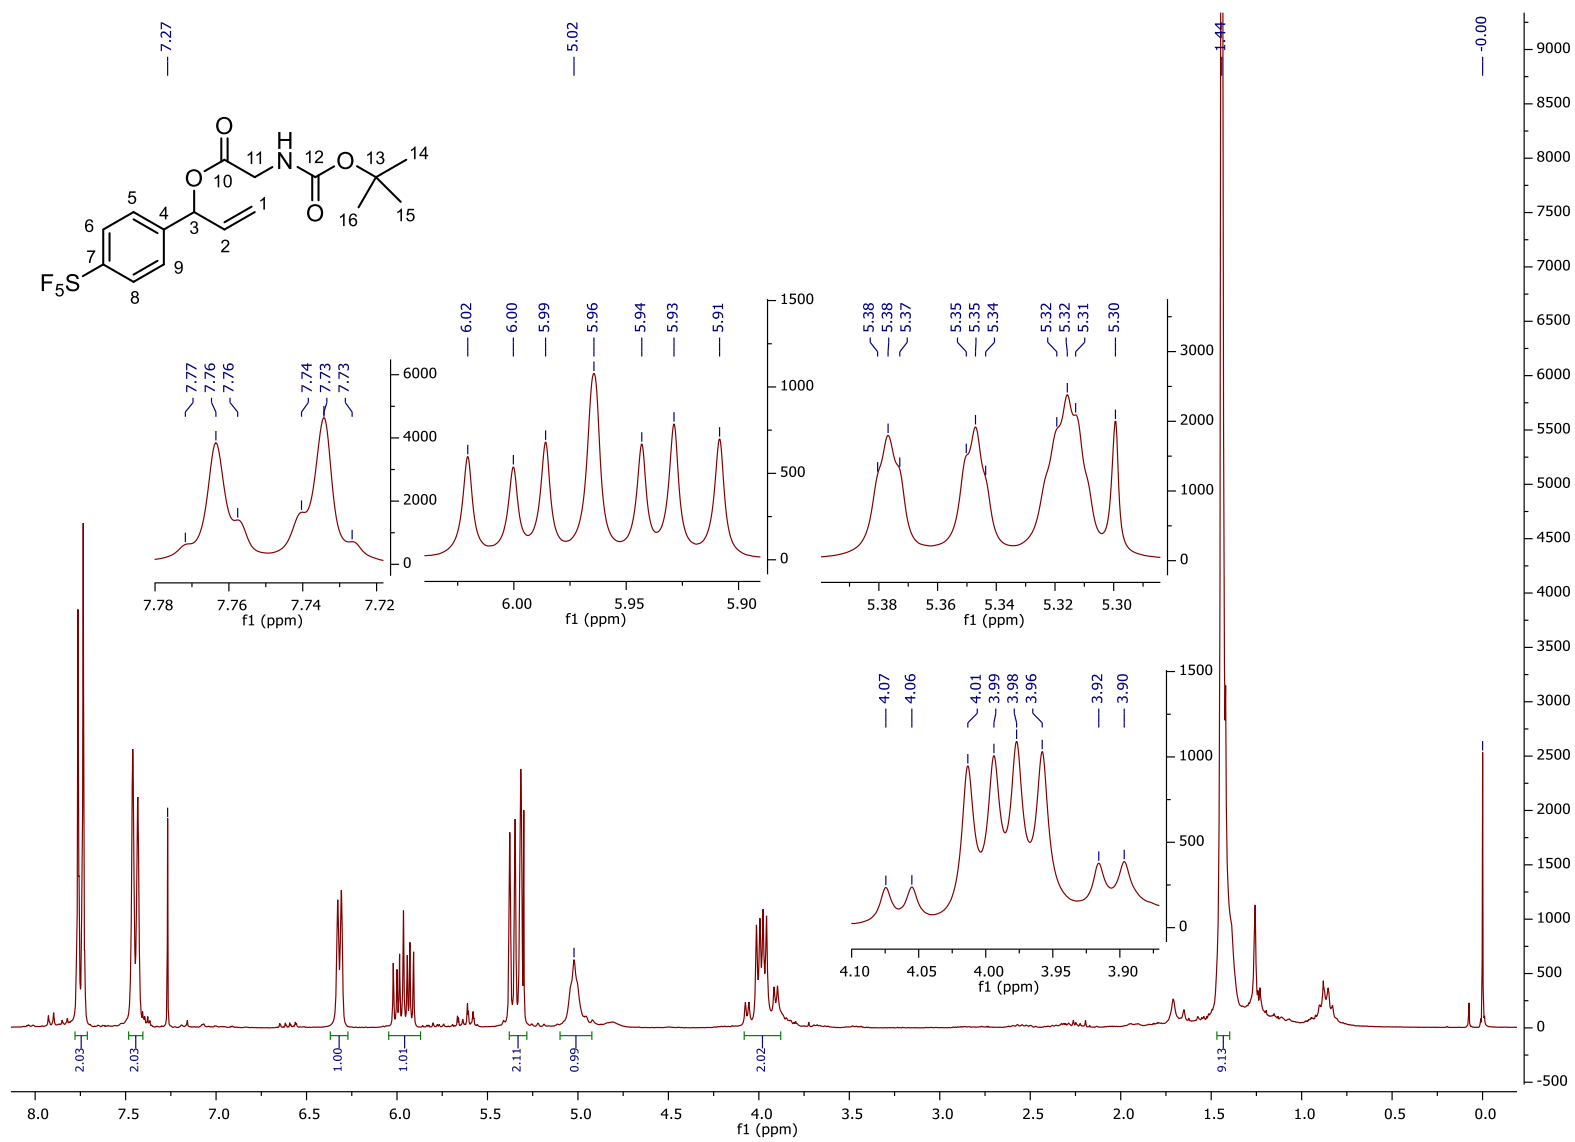



<sup>13</sup>C NMR spectrum of compound 6

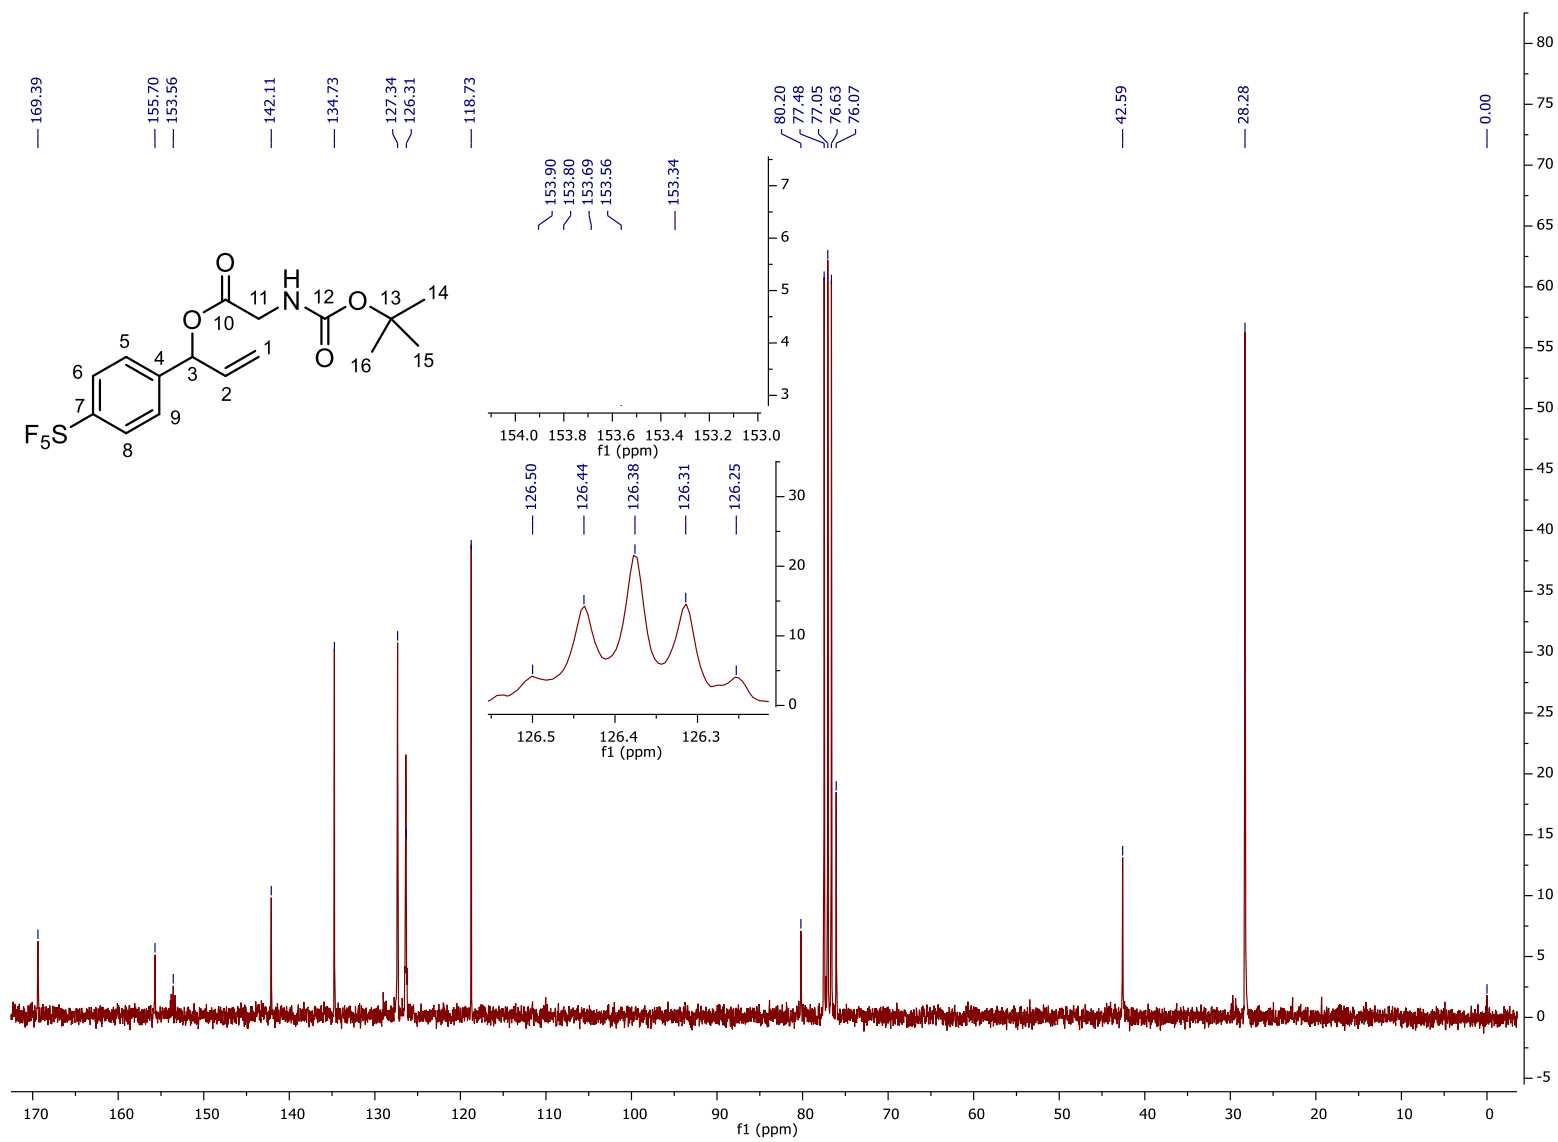

<sup>19</sup>F NMR spectrum of compound 6

Jan19-2010.215.fid  
hau husstedt whu144b  
f19 CDCl3 /opt/topspin av1 20

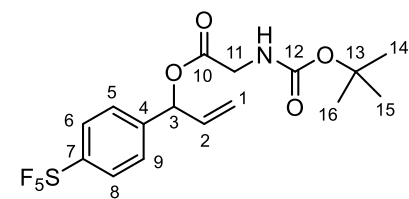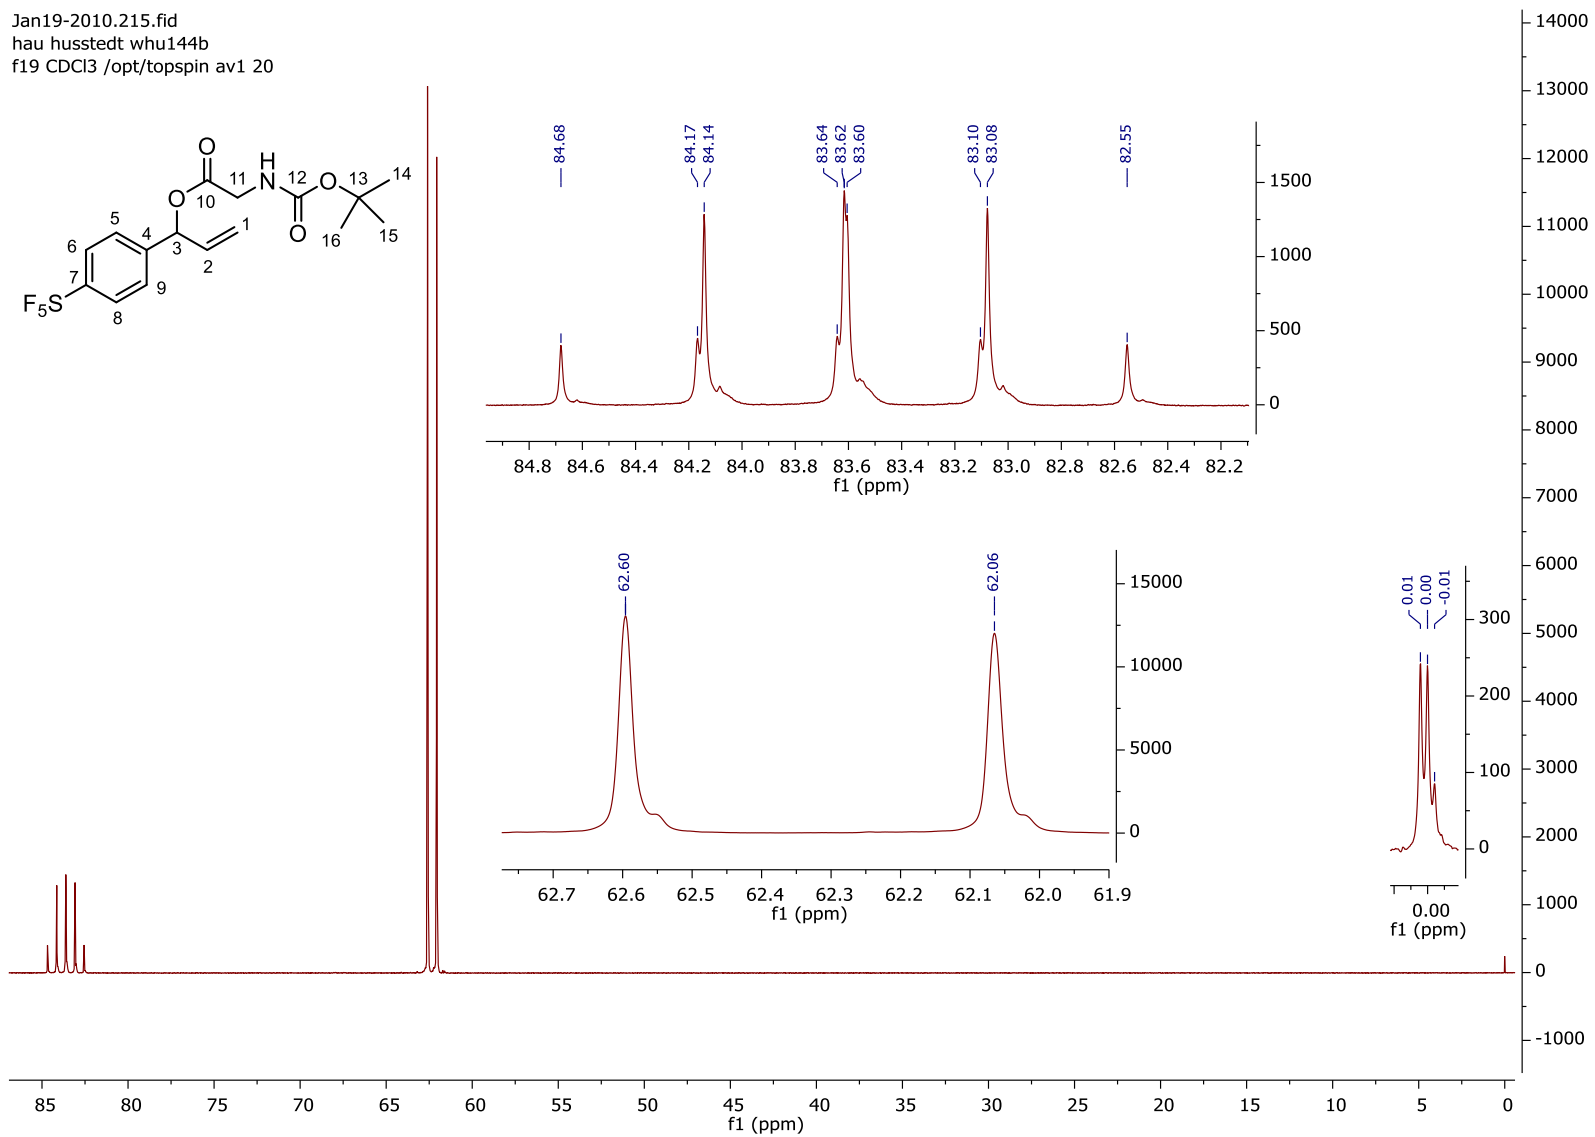

# <sup>1</sup>H NMR spectrum of compound 7

Feb22-2010  
hau husstedt whu 145f  
proton CDCl<sub>3</sub> /opt/topspin av1 24

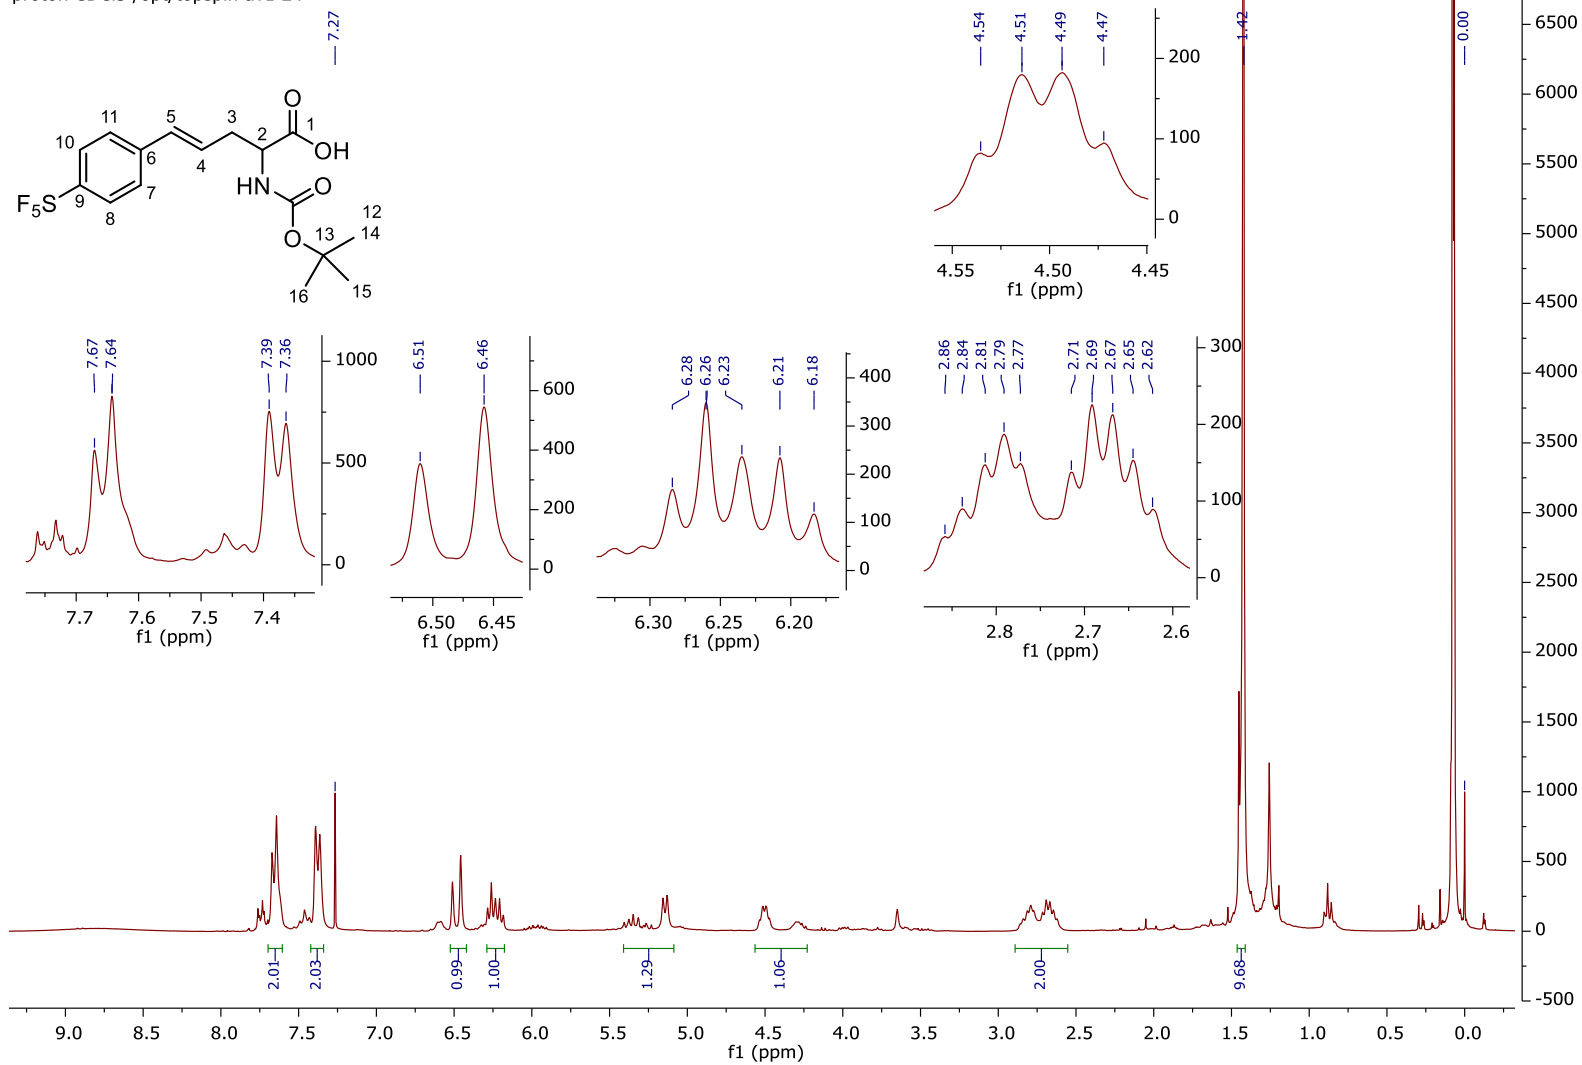

# <sup>13</sup>C NMR spectrum of compound 7

Feb22-2010  
hau husstedt whu 145f  
carbon CDCl<sub>3</sub> /opt/topspin av1.24

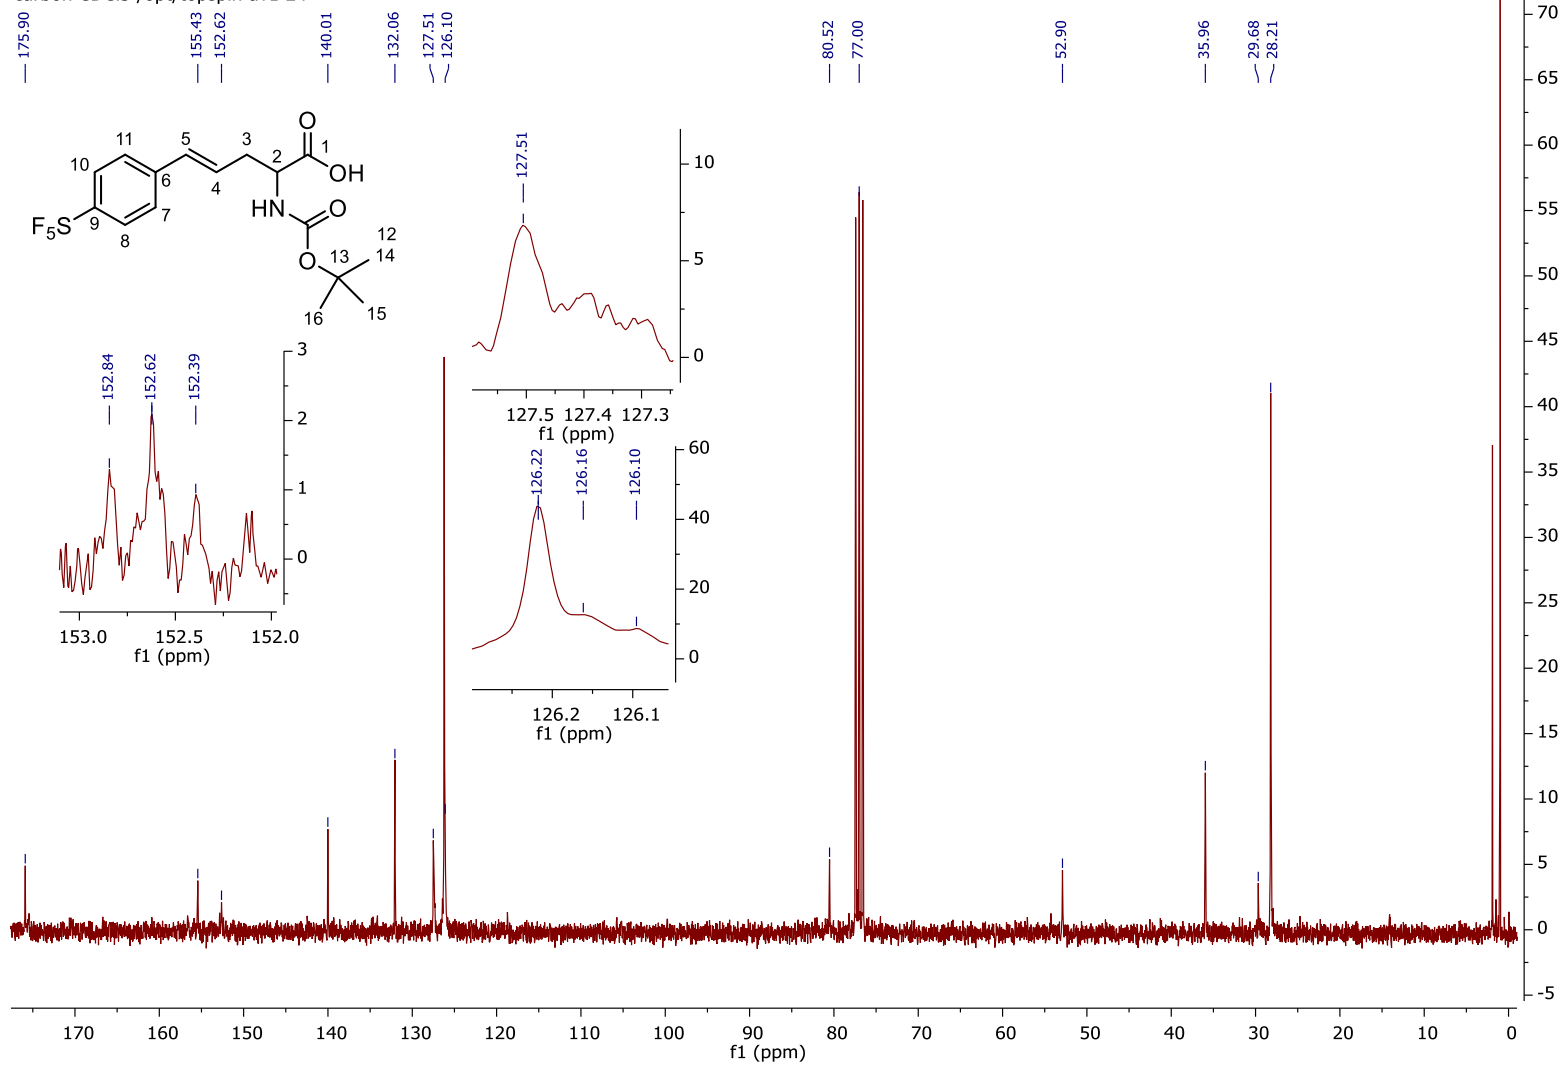

# <sup>19</sup>F NMR spectrum of compound 7

Feb22-2010  
hau husstedt whu 145f  
f19cpd CDCl3 /opt/topspin av1 24

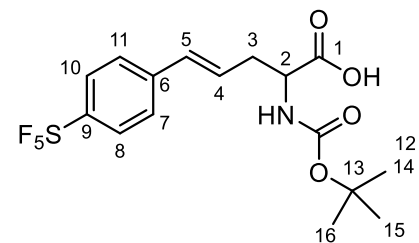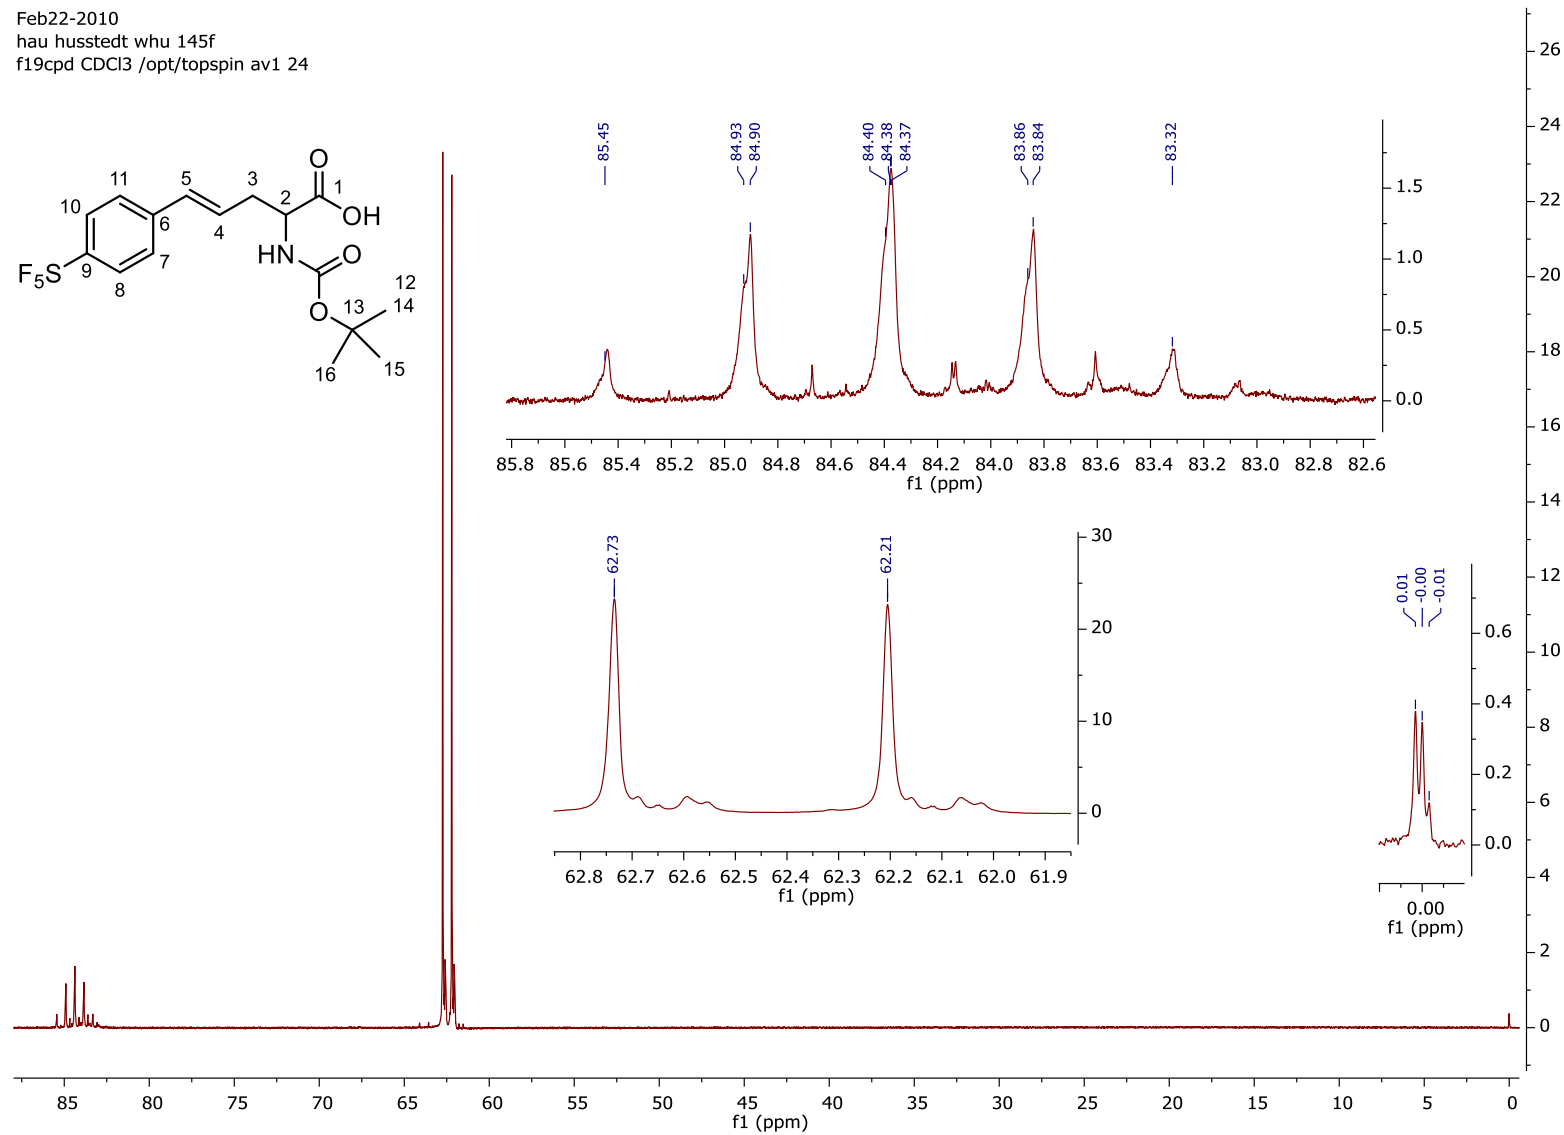

# <sup>1</sup>H NMR spectrum of compound **8**

Jan19-2010.200.fid  
hau husstedt whu142b  
proton CDCl3 /opt/topspin av1 19

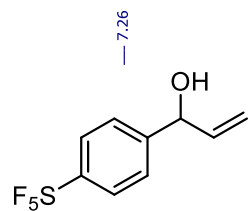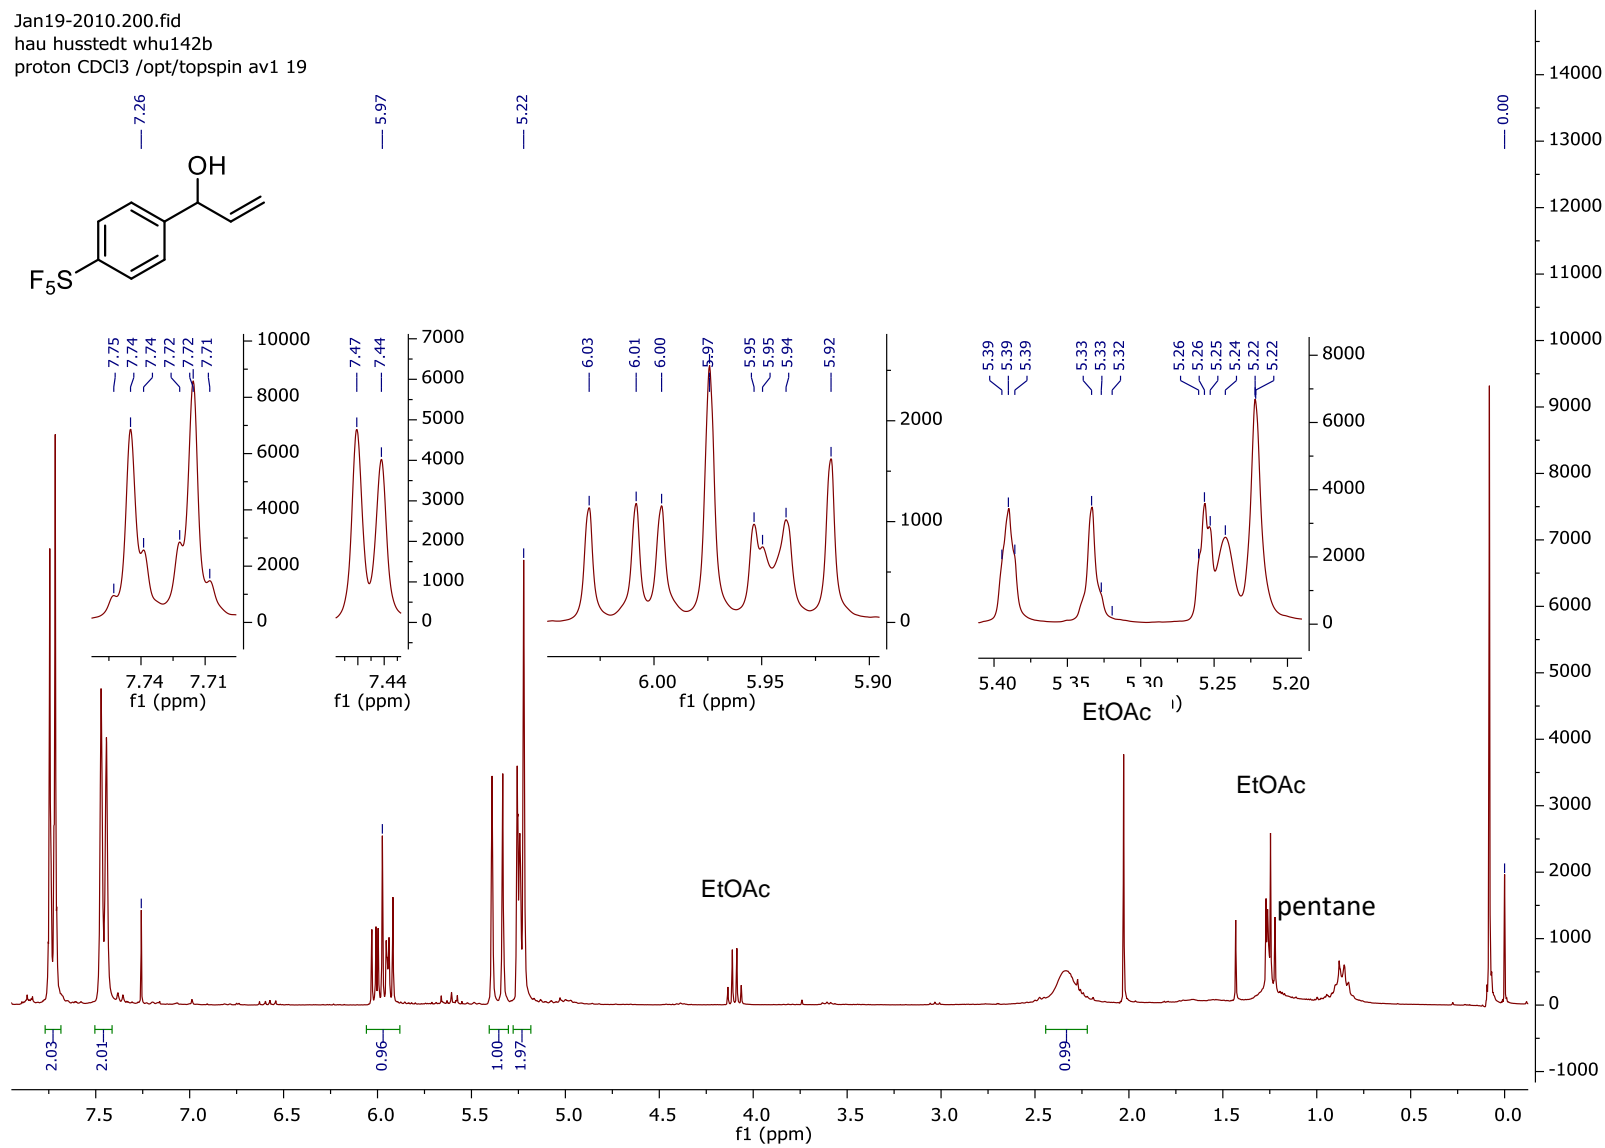

# <sup>13</sup>C NMR spectrum of compound 8

Jan19-2010.201.fid  
hau husstedt whu142b  
carbon CDCl3 /opt/topspin av1 19

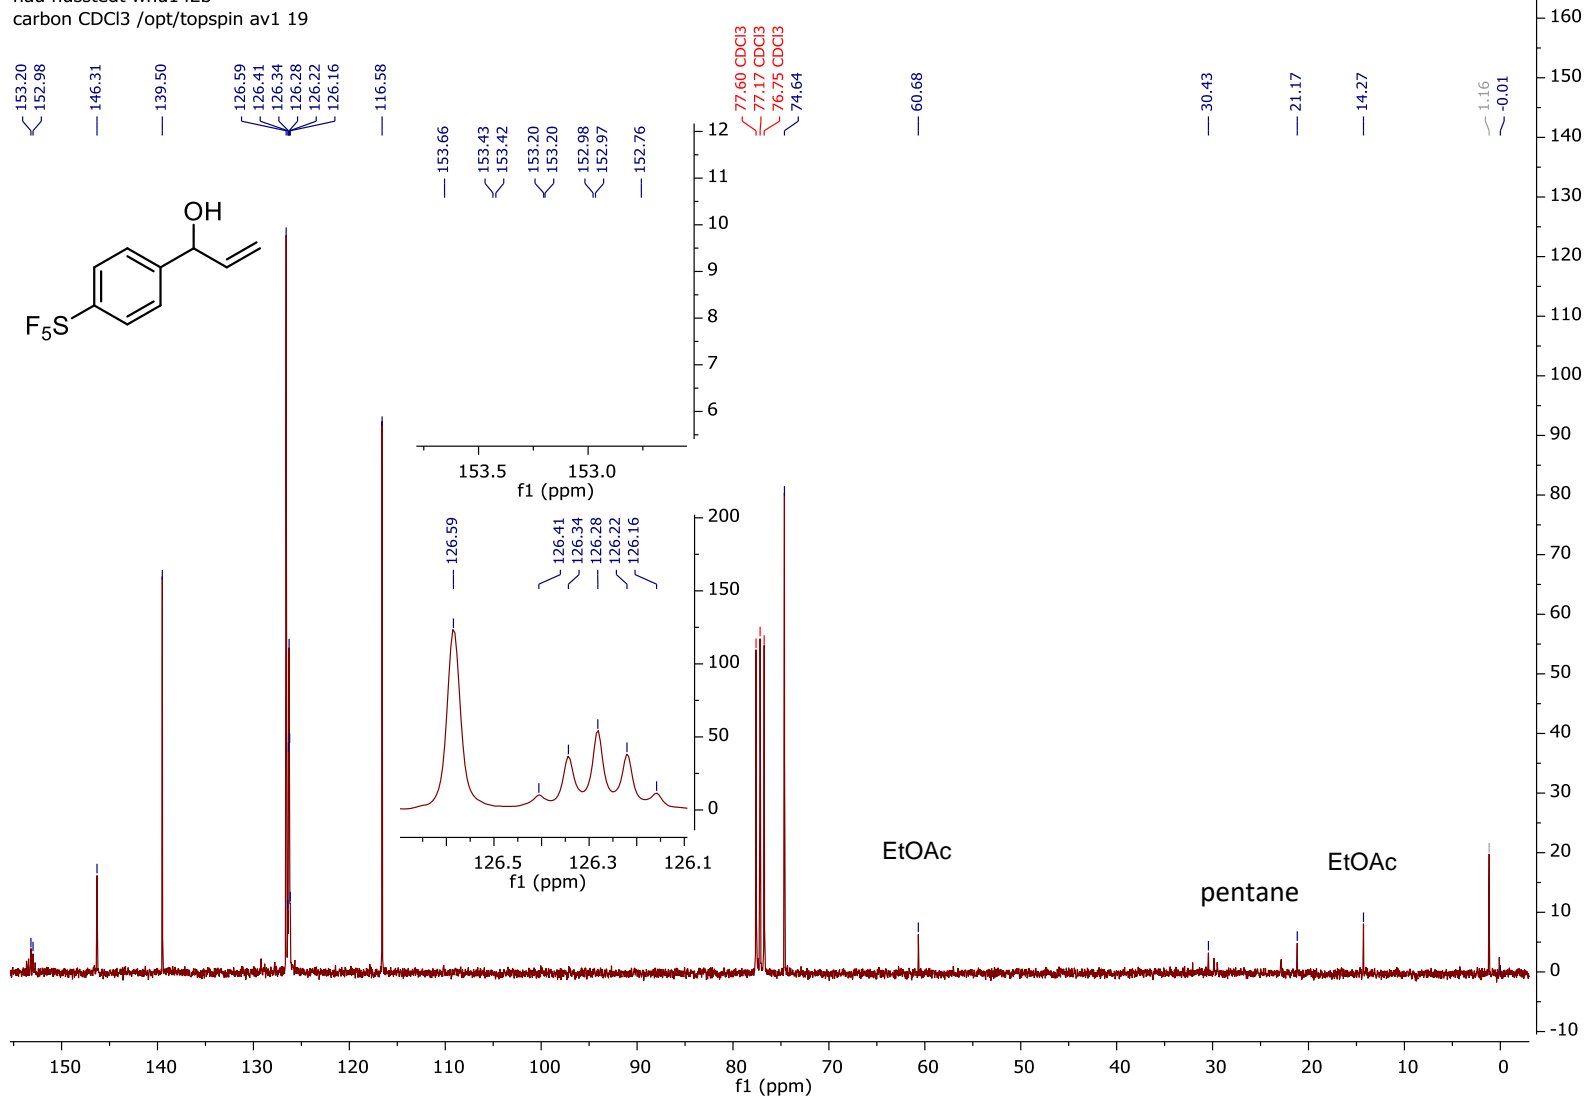

<sup>13</sup>C NMR spectrum of compound **8**

Jan19-2010.205.fid  
hau\_husstedt\_whu142b  
f19 CDCl3 /opt/topspin av1 19

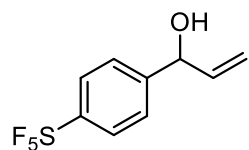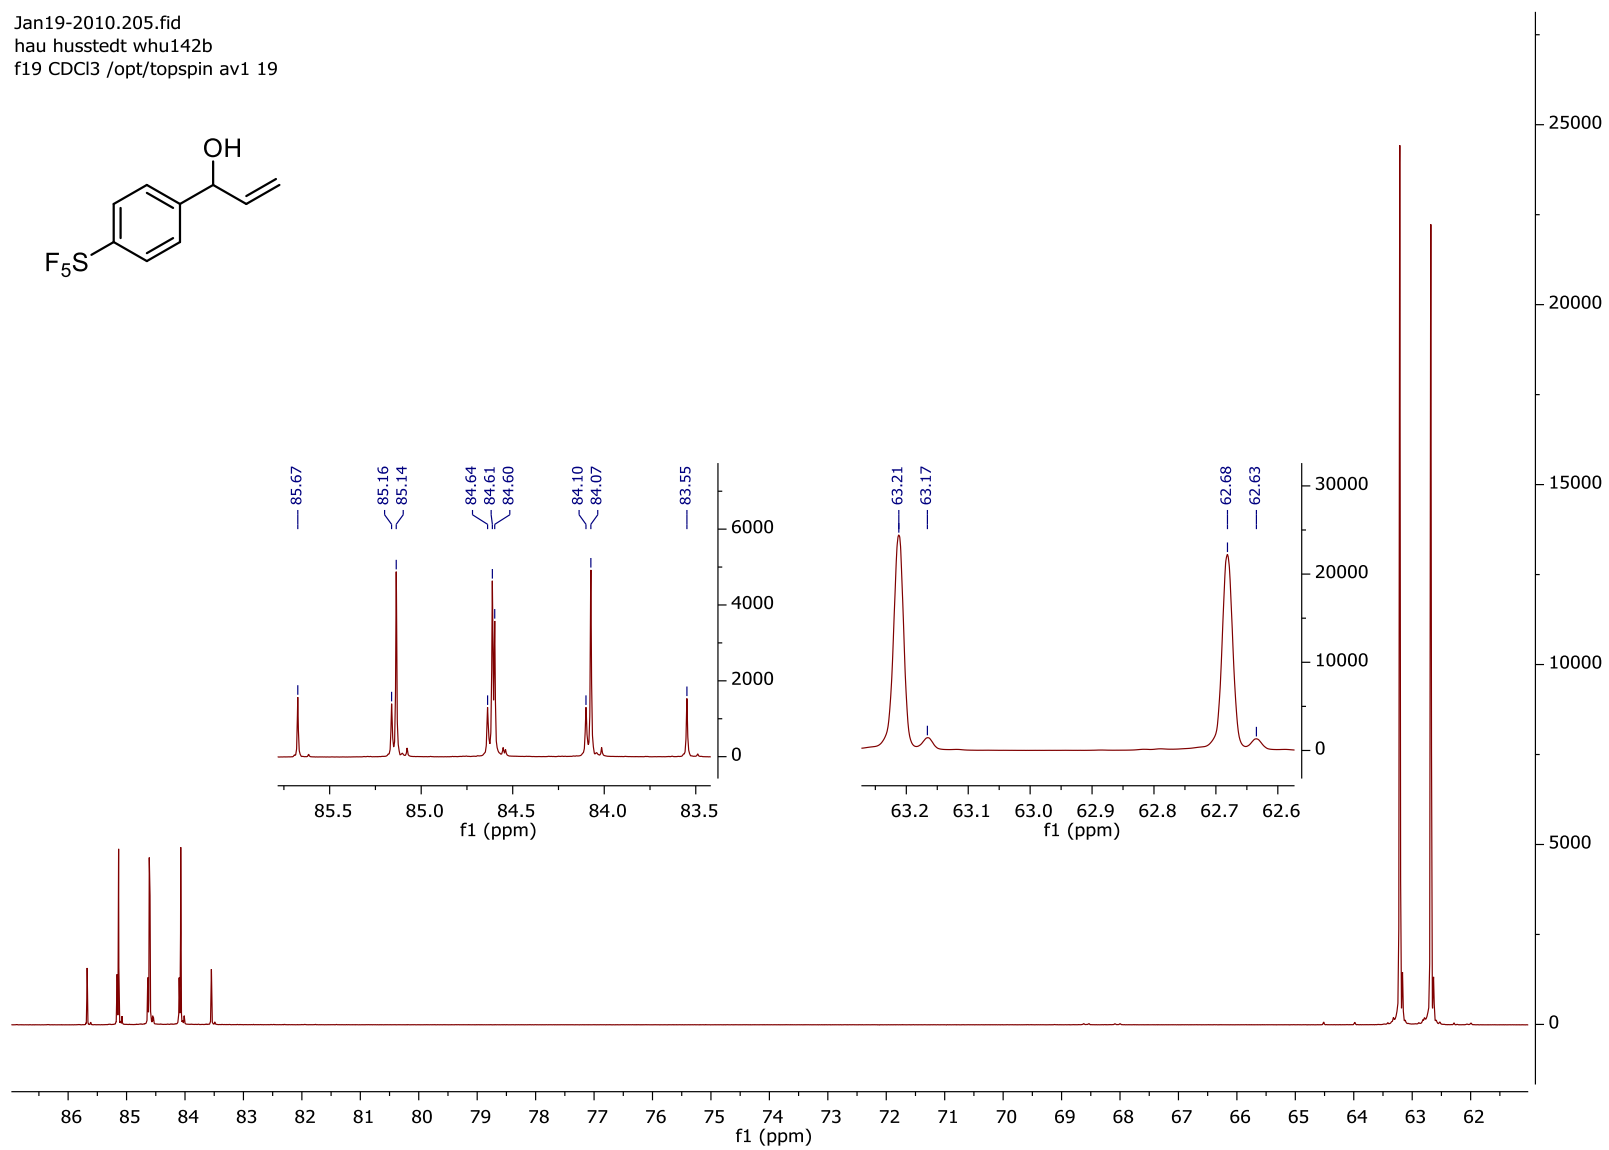



# <sup>1</sup>H NMR spectrum of compound 9

Jan29-2010.150.fid  
hau husstedt whu 147a  
proton CDCl<sub>3</sub> /opt/topspin av1 5

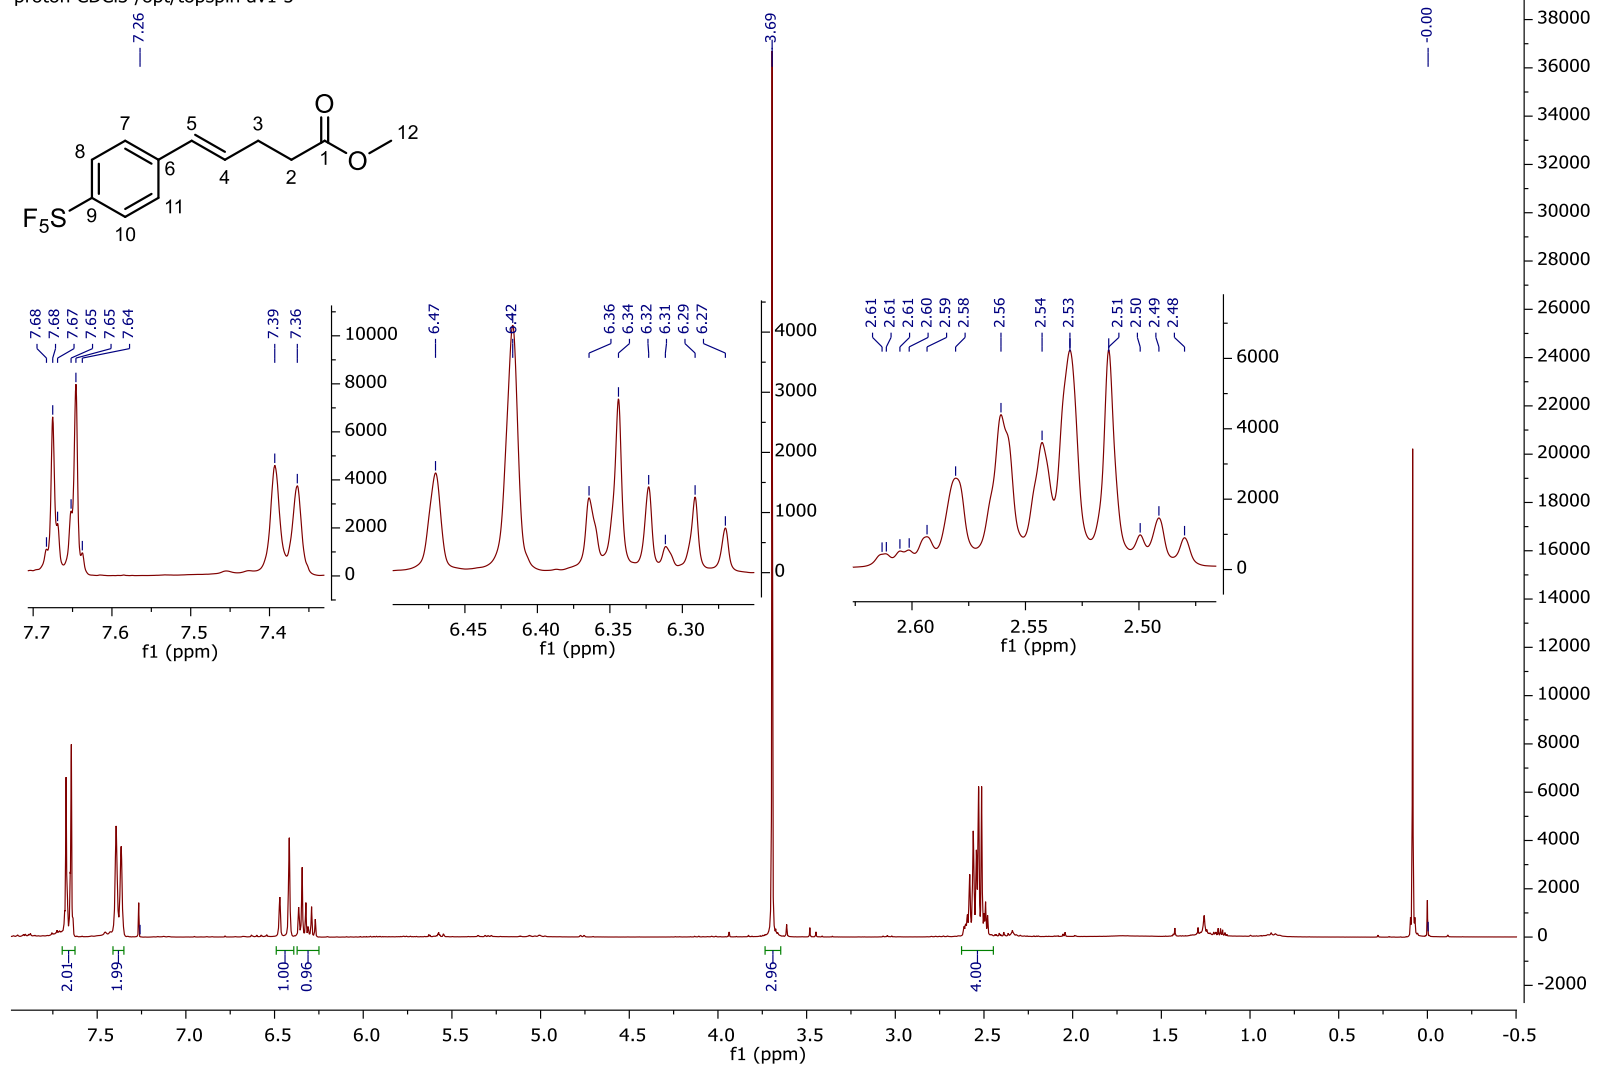

# <sup>13</sup>C NMR spectrum of compound 9

Jan29-2010.151.fid  
hau husstedt whu 147a  
carbon\_256 CDCl3 /opt/topspin av1 5

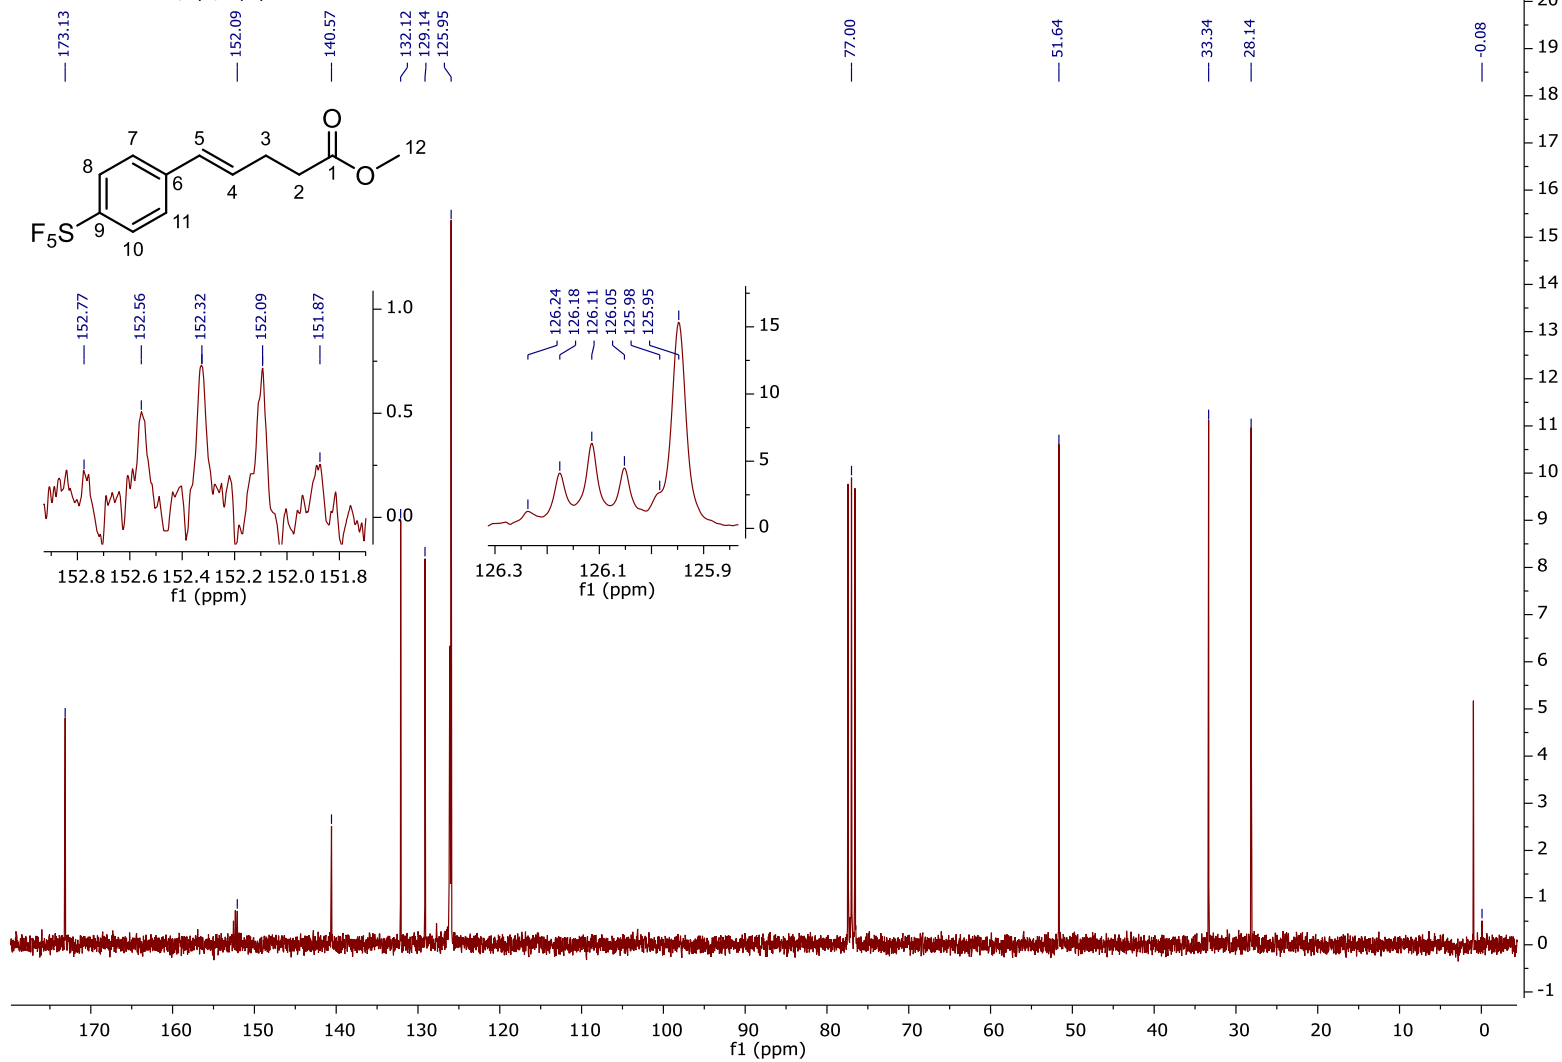

<sup>19</sup>F NMR spectrum of compound **9**

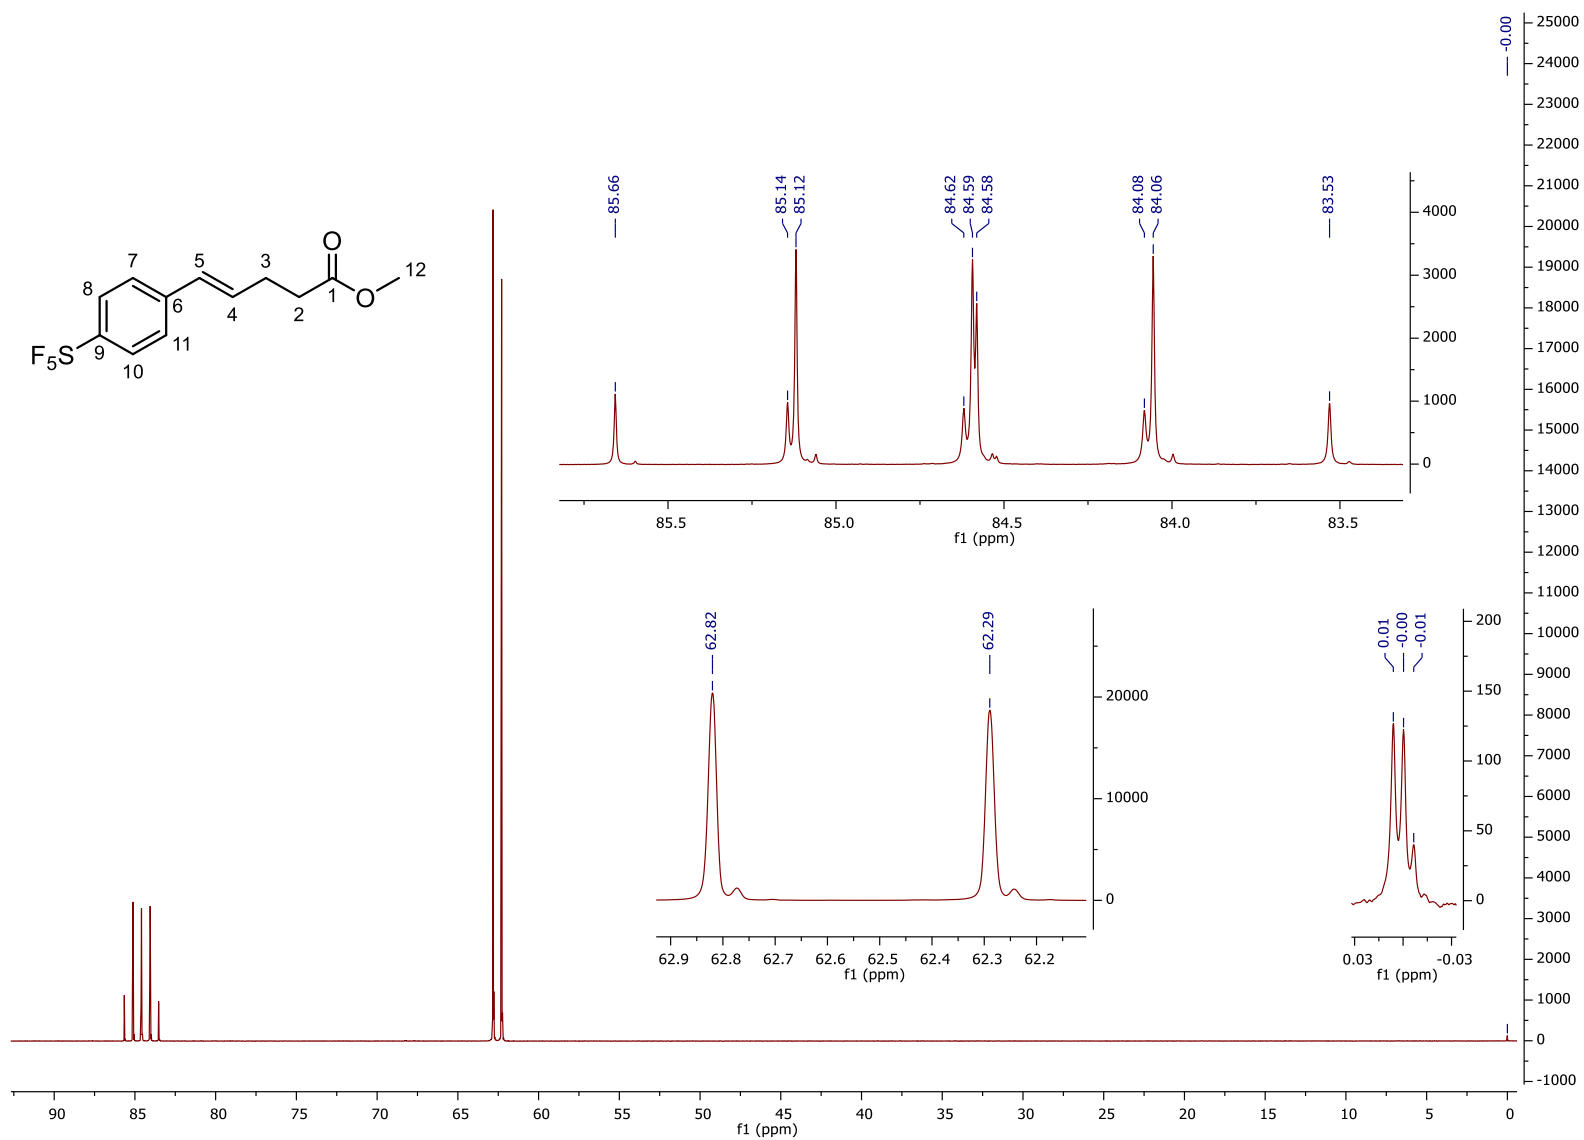

# <sup>1</sup>H NMR spectrum of compound 10g

Oct12-2010  
hau kapries ank 330  
proton CDCl3 /opt/topspin av1 27

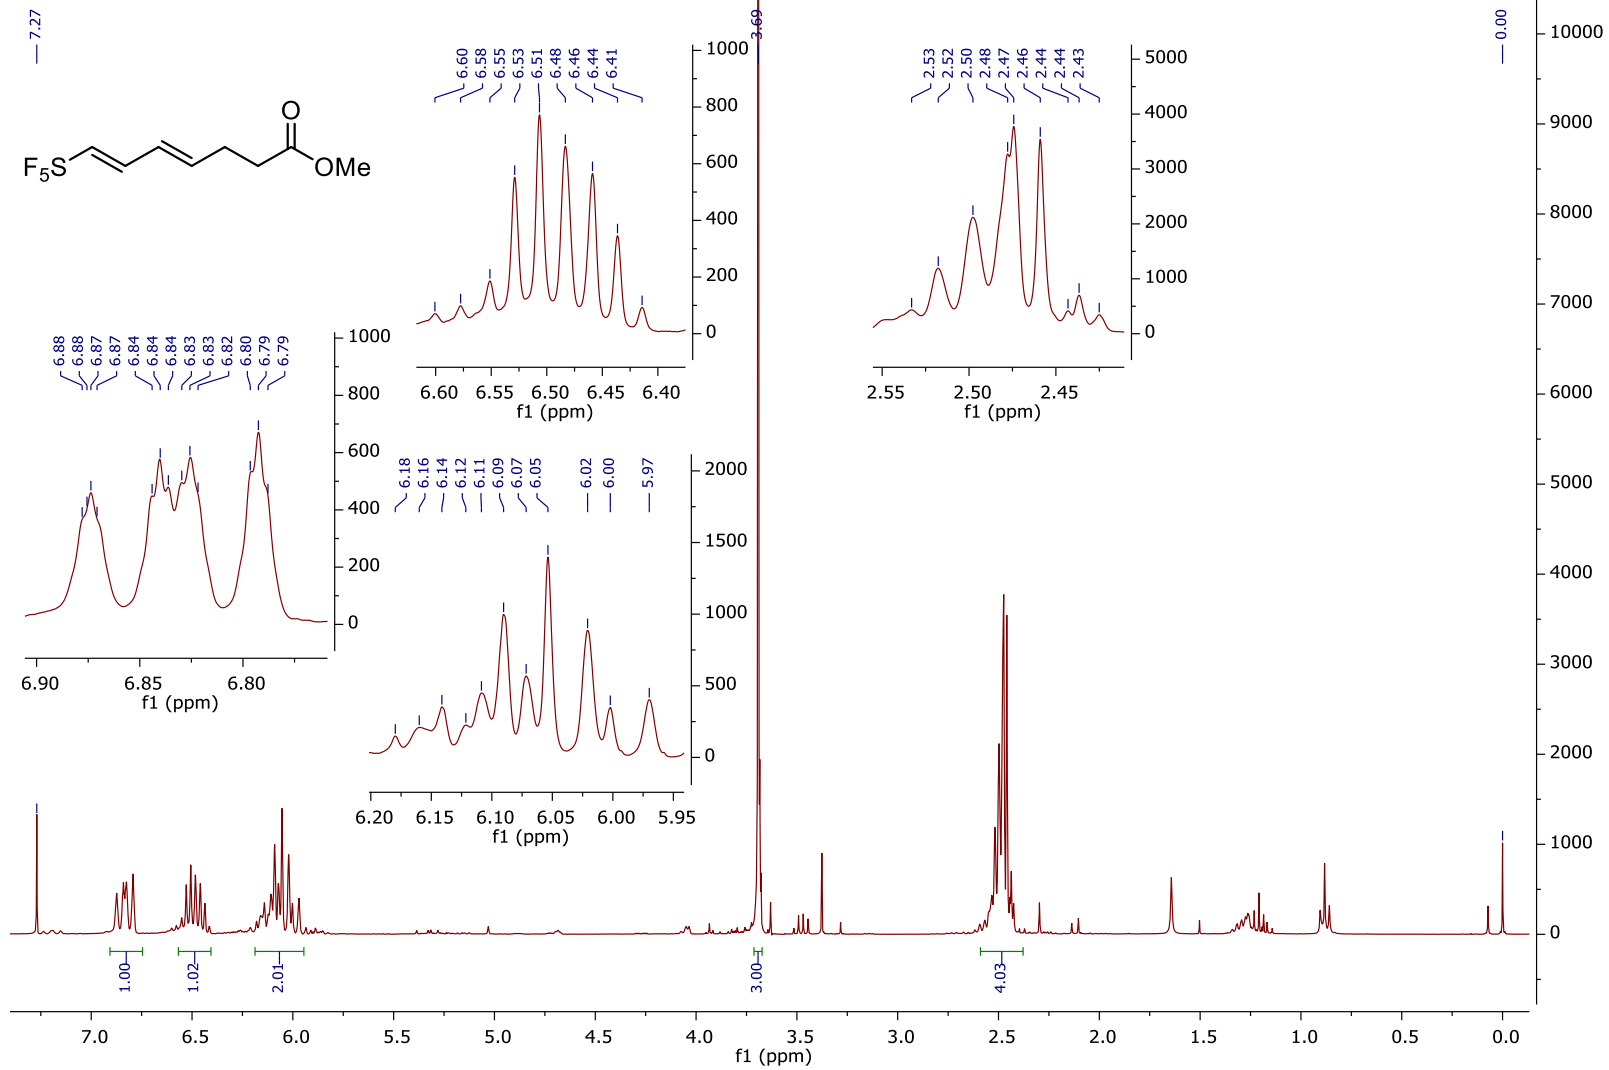

# <sup>13</sup>C NMR spectrum of compound 10g

Oct12-2010  
hau kapries ank 330  
carbon\_256 CDCl3 /opt/topspin av1 27

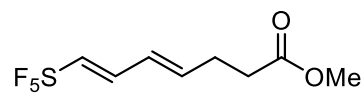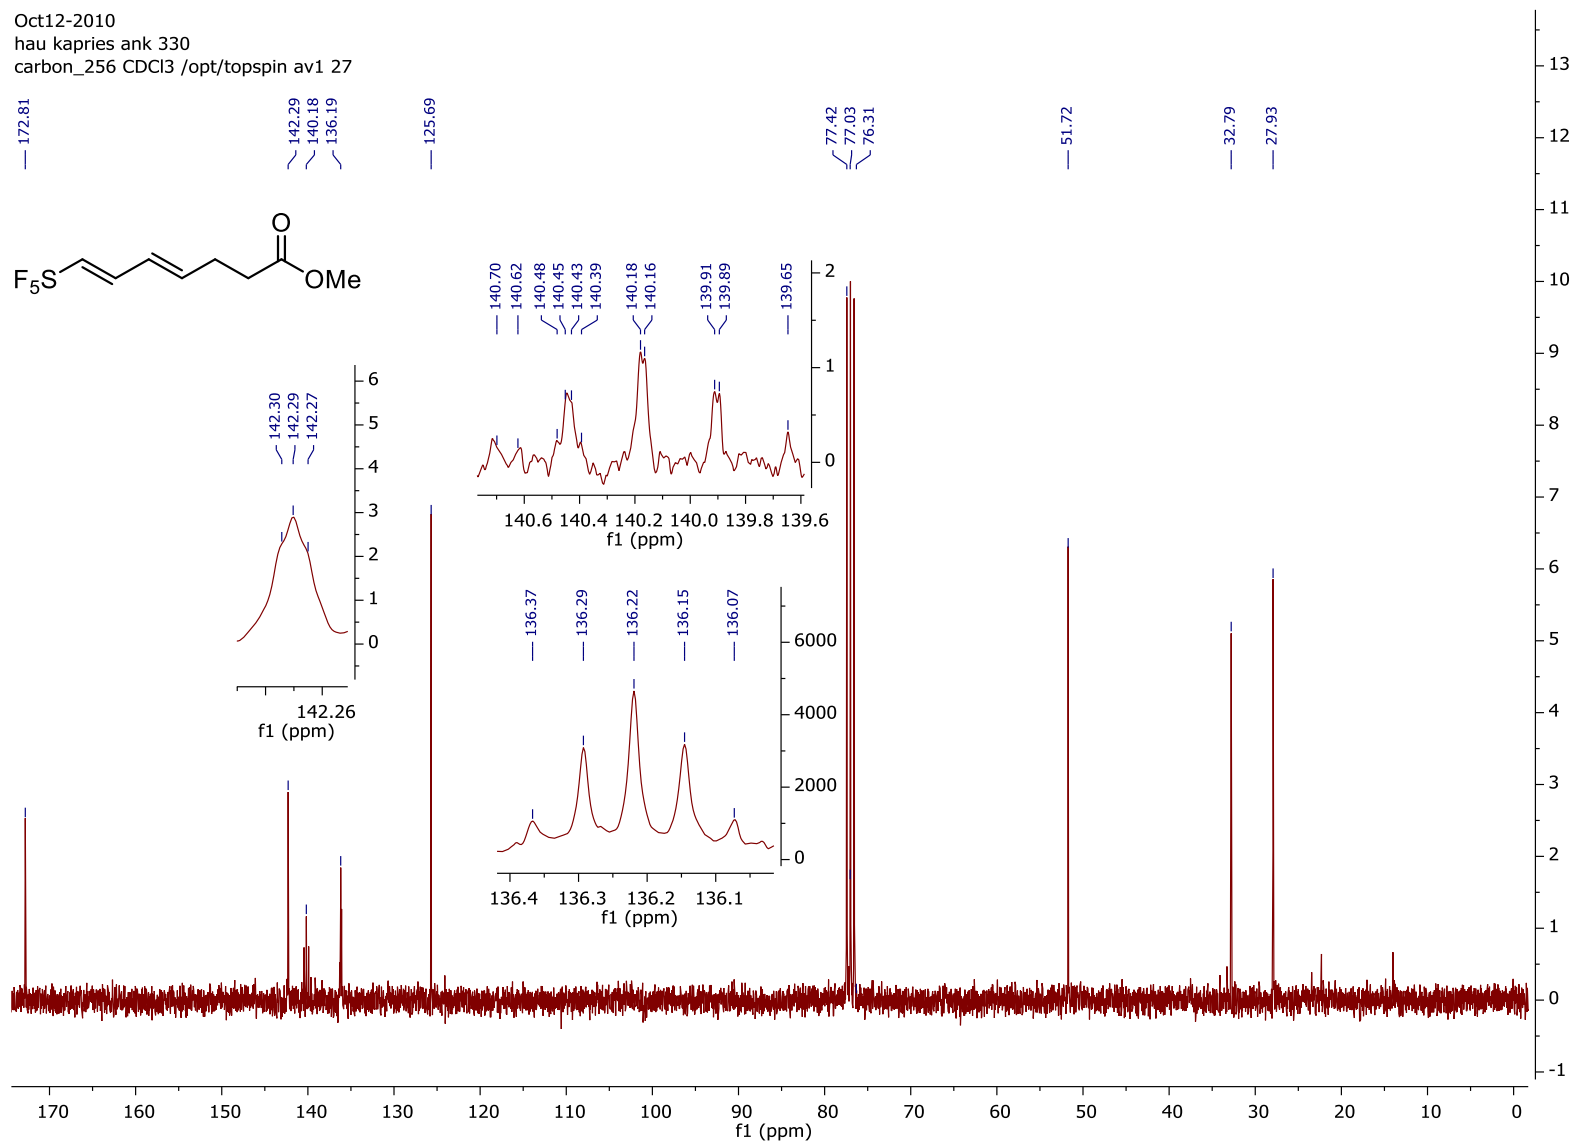

<sup>19</sup>F NMR spectrum of compound **10g**

Oct13-2010  
hau kapries ank 330  
f19cpd CDCl3 /opt/topspin av1 27

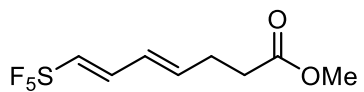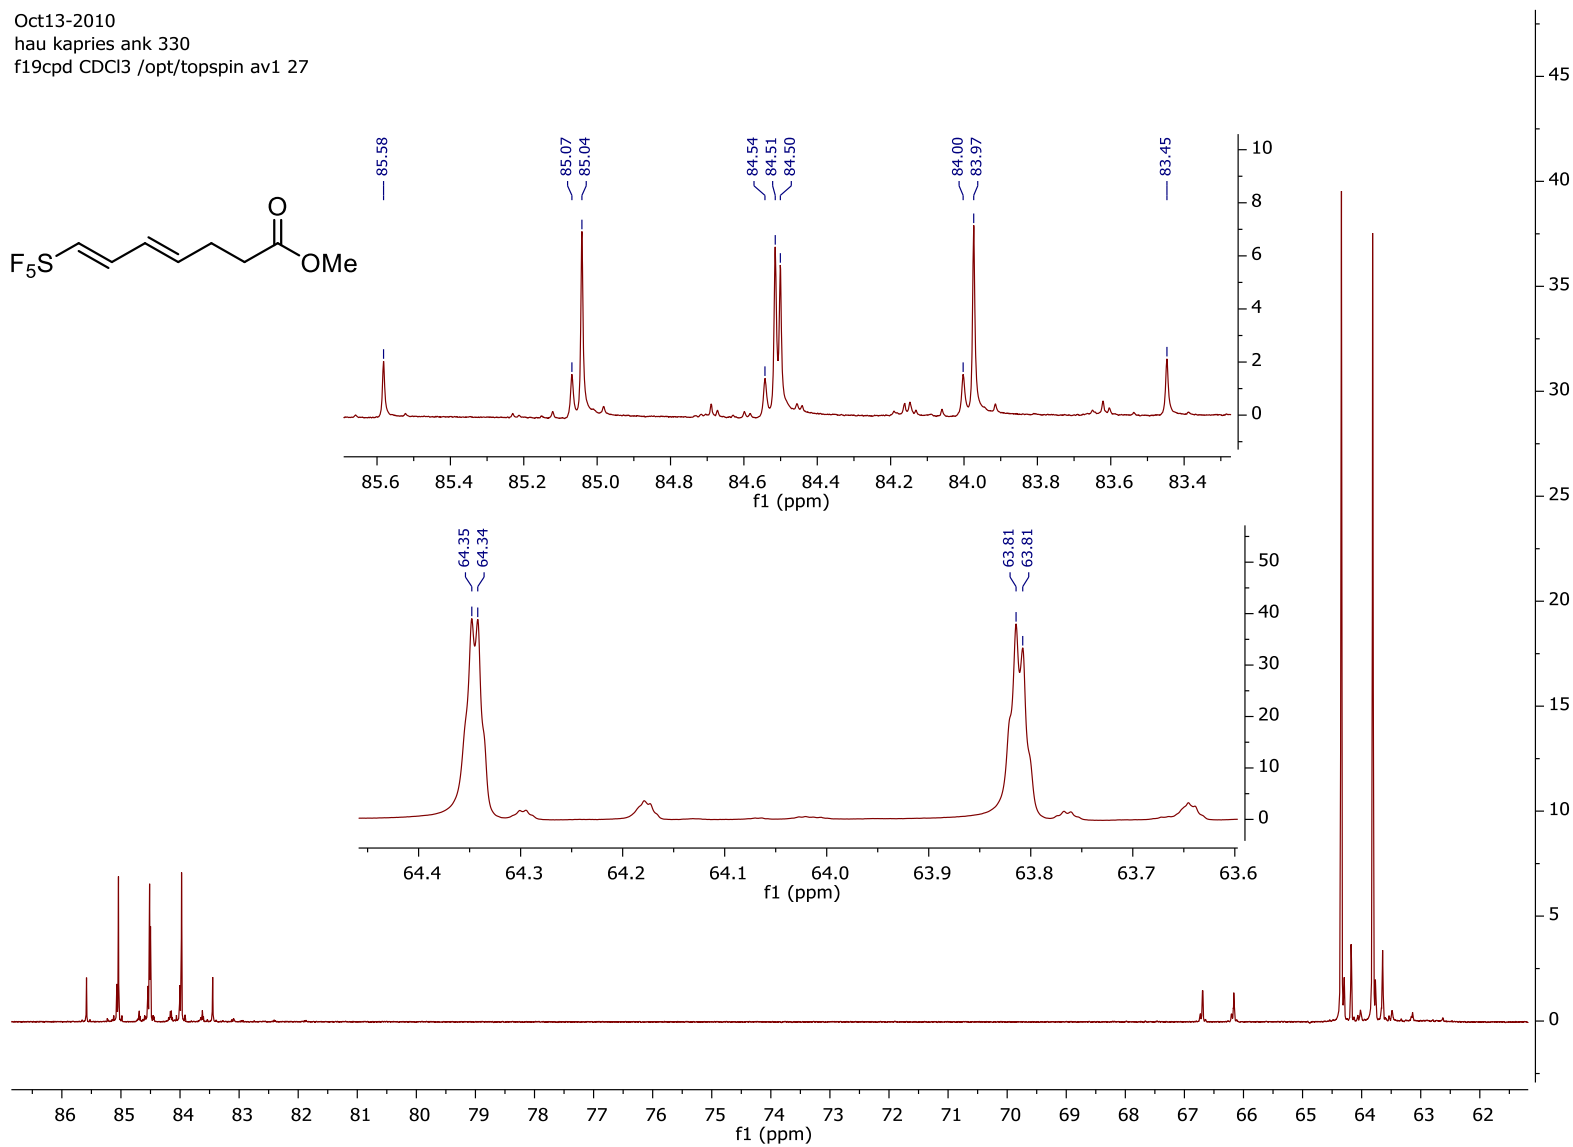

# <sup>1</sup>H NMR spectrum of compound 10h

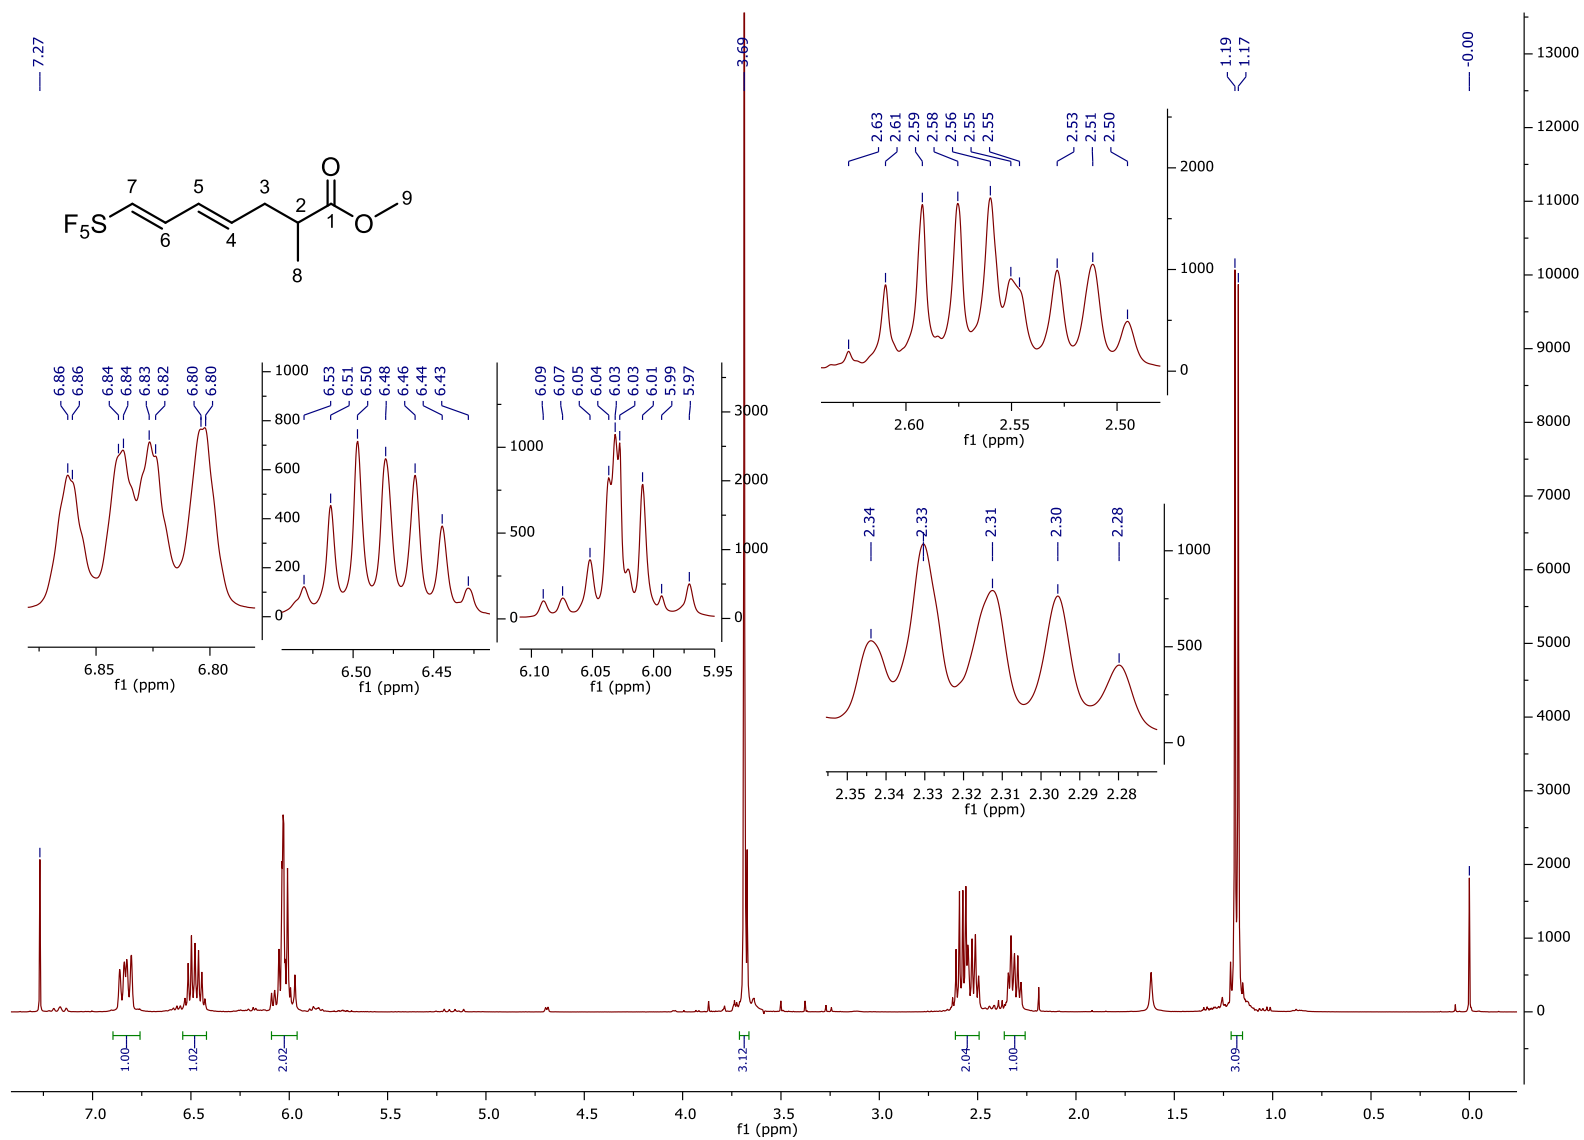

<sup>13</sup>C NMR spectrum of compound **10h**

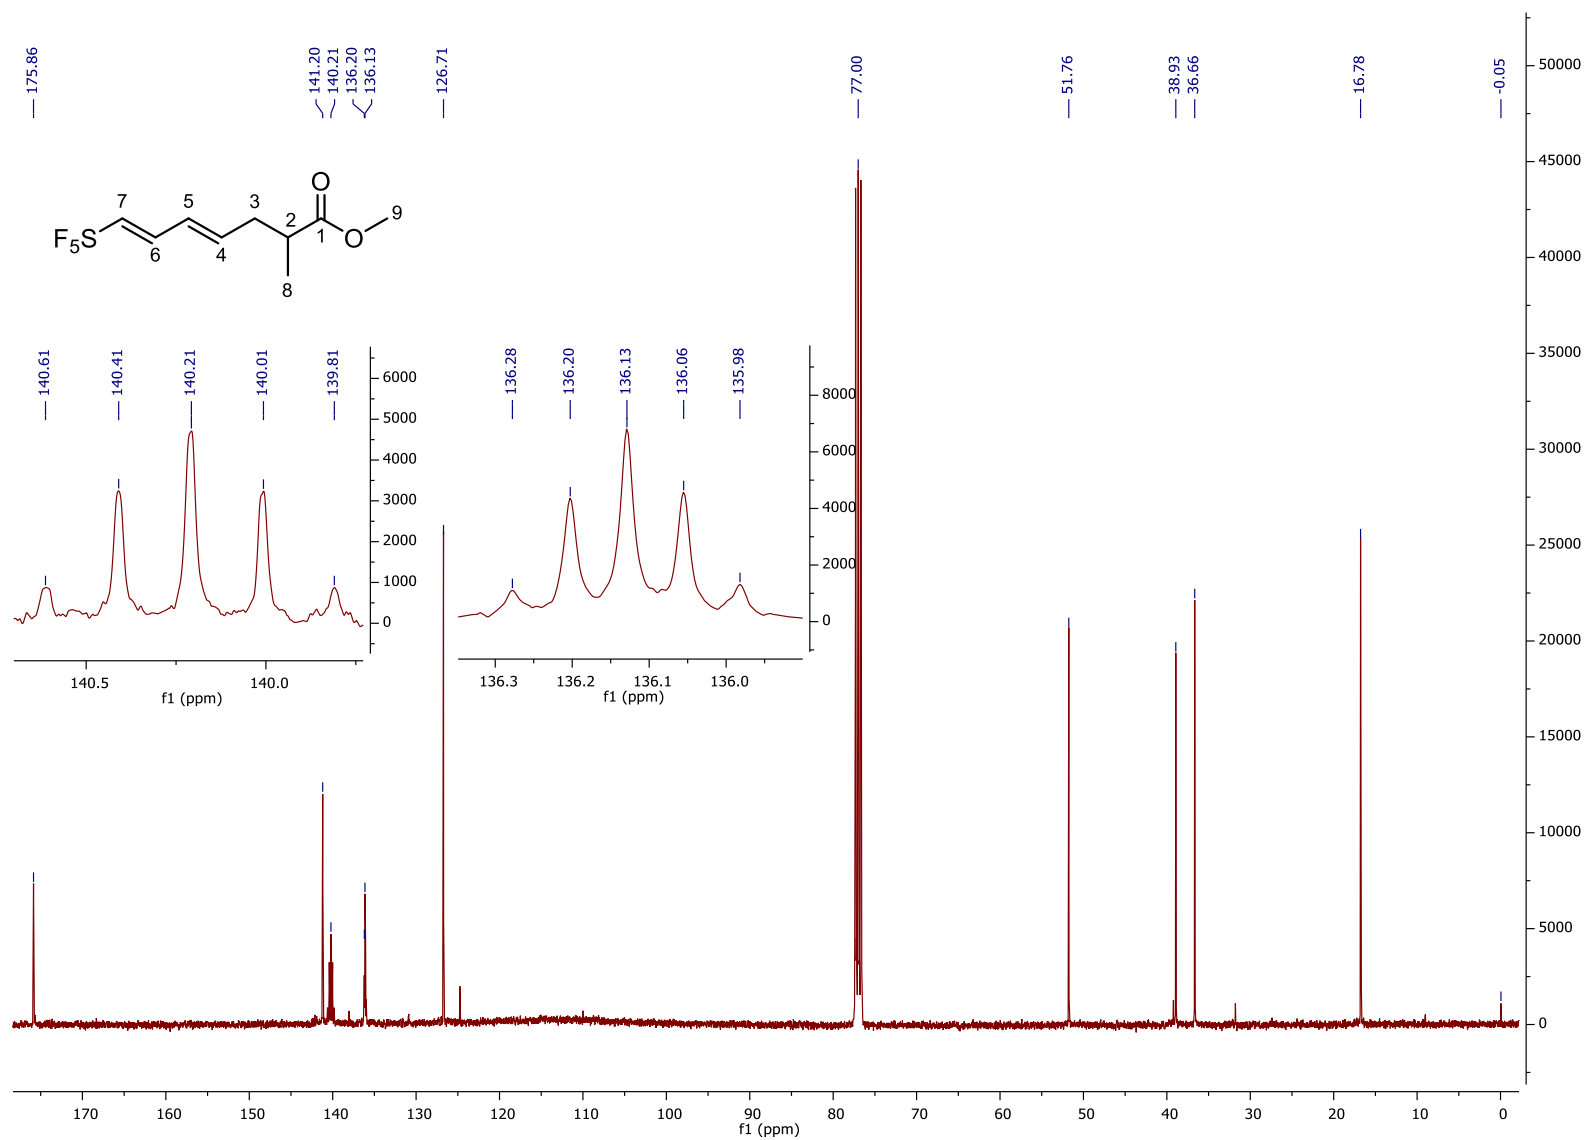



<sup>19</sup>F NMR spectrum of compound 10h

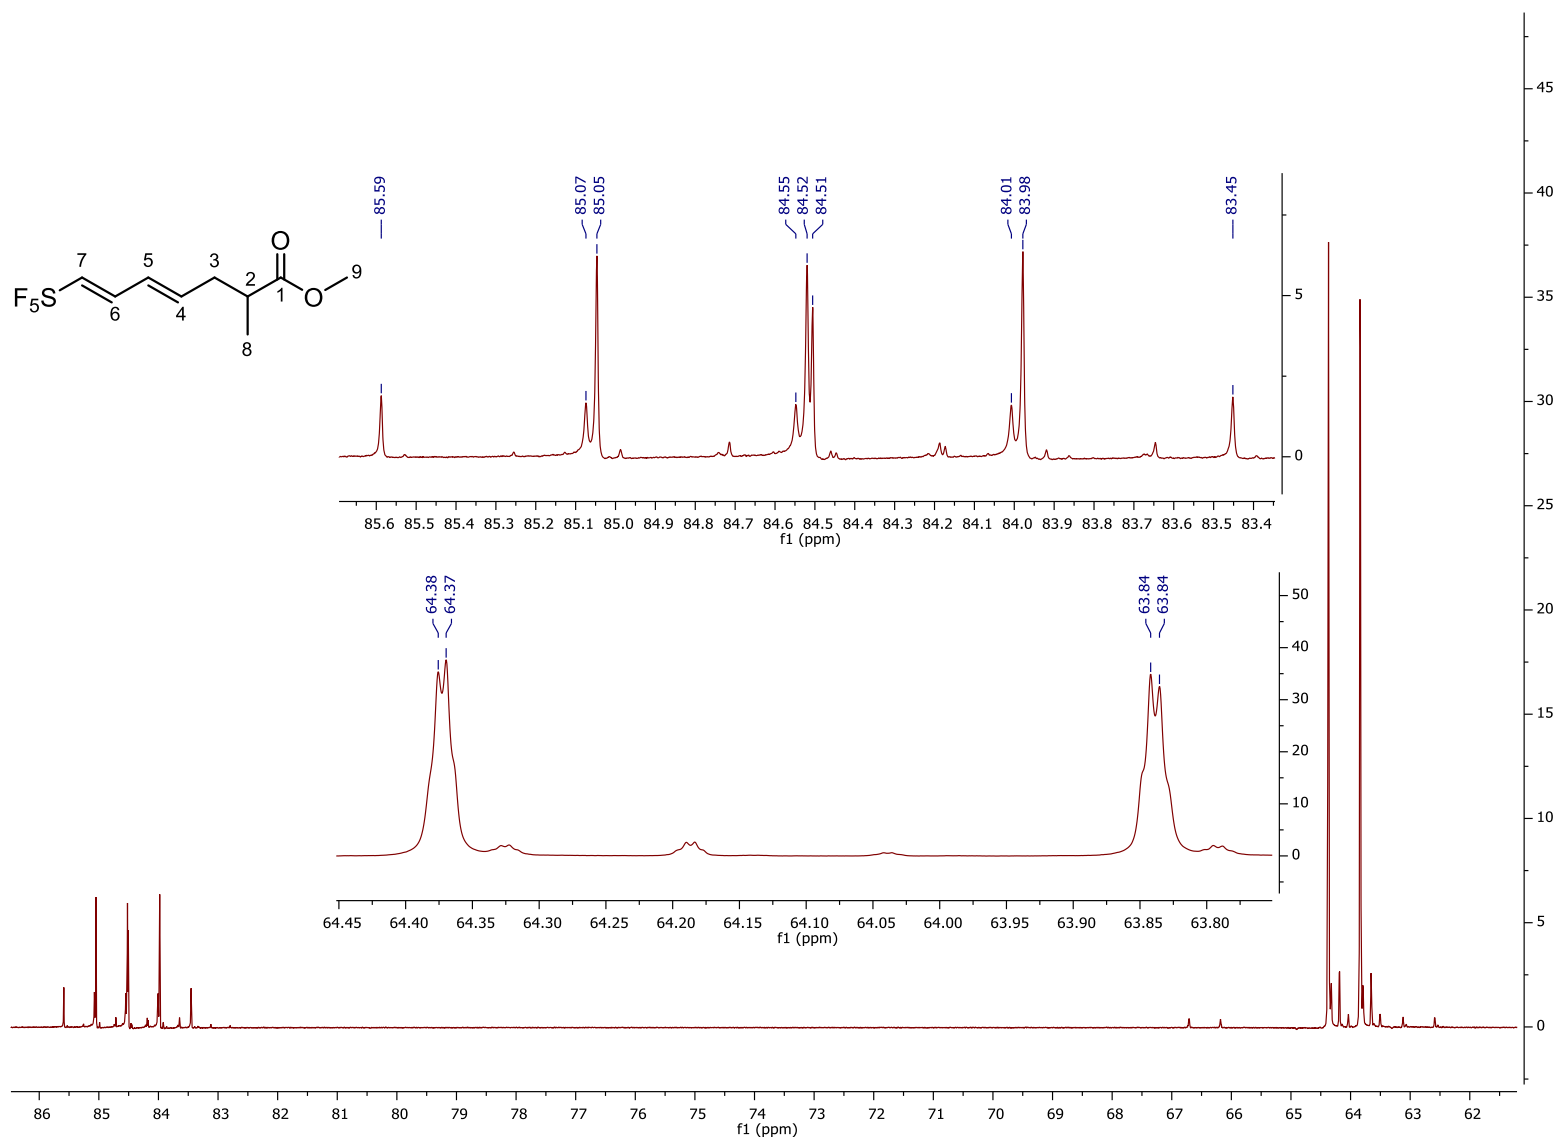

# <sup>1</sup>H NMR spectrum of compound 11

Jun23-2015.240.fid  
hau dudzinski pdu 564  
proton CDCl<sub>3</sub> /opt/topspin av1 32

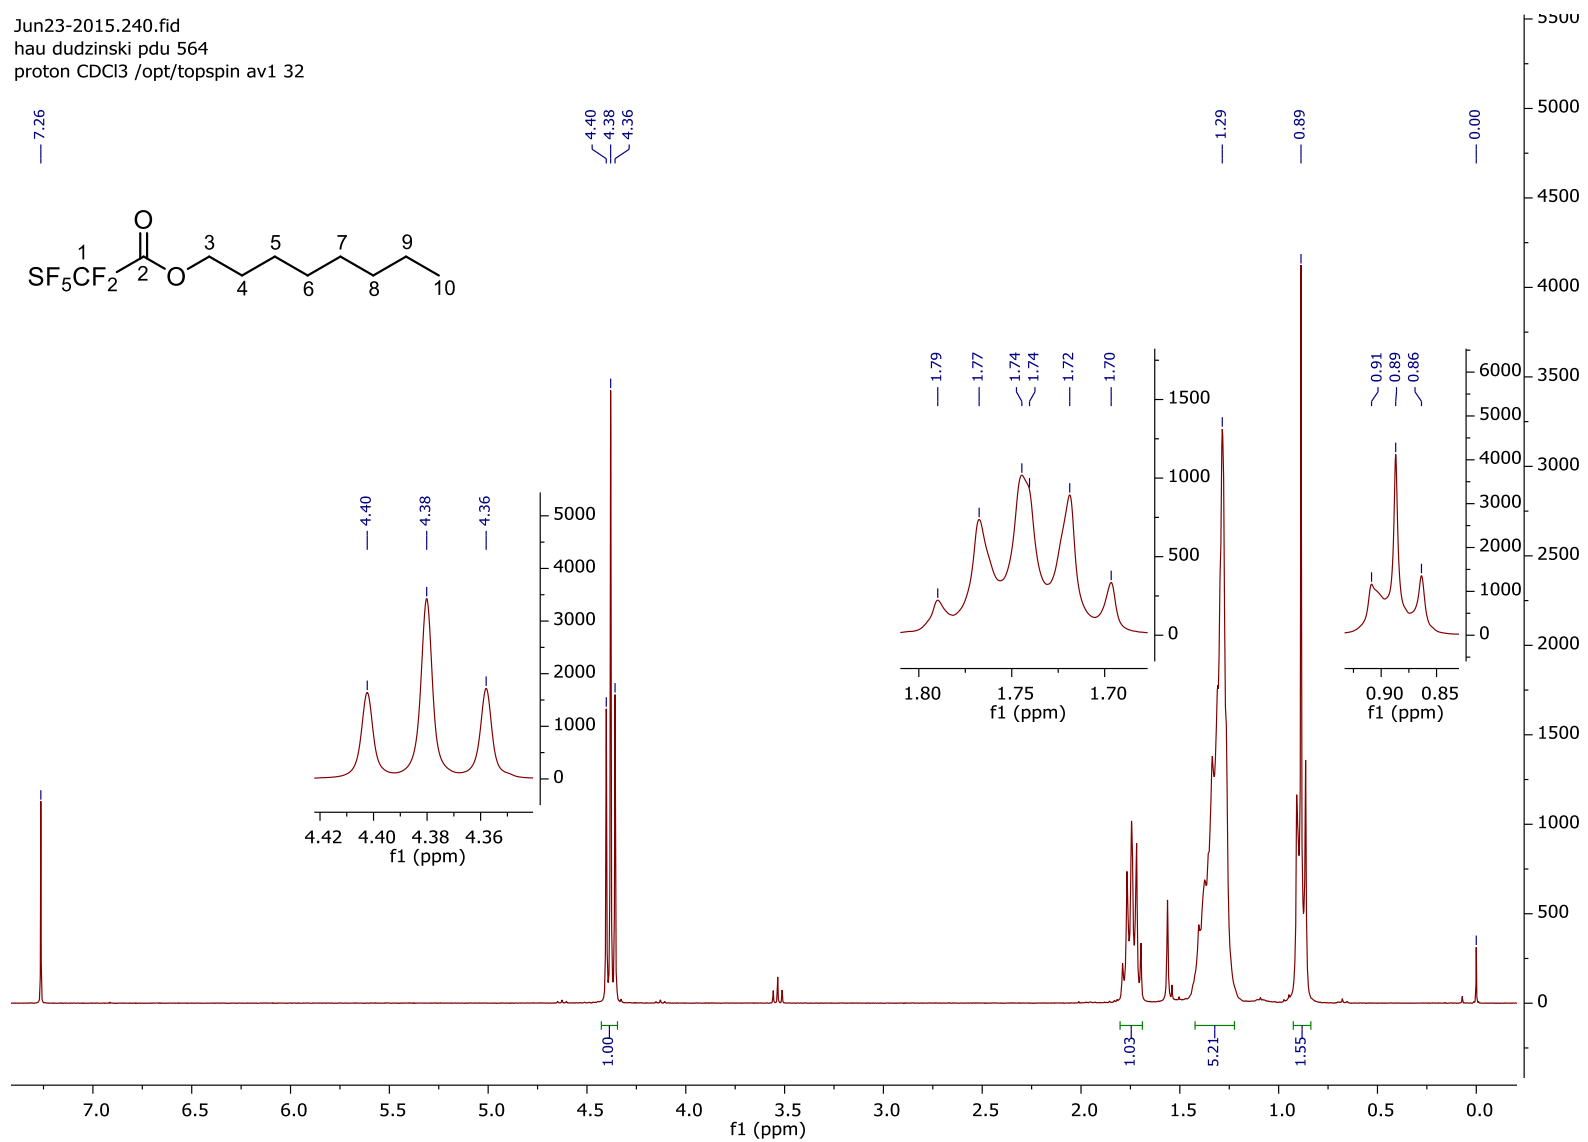

# <sup>13</sup>C NMR spectrum of compound 11

Jun23-2015.241.fid  
hau dudzinski pdu 564  
carbon CDCl<sub>3</sub> /opt/topspin av1.32

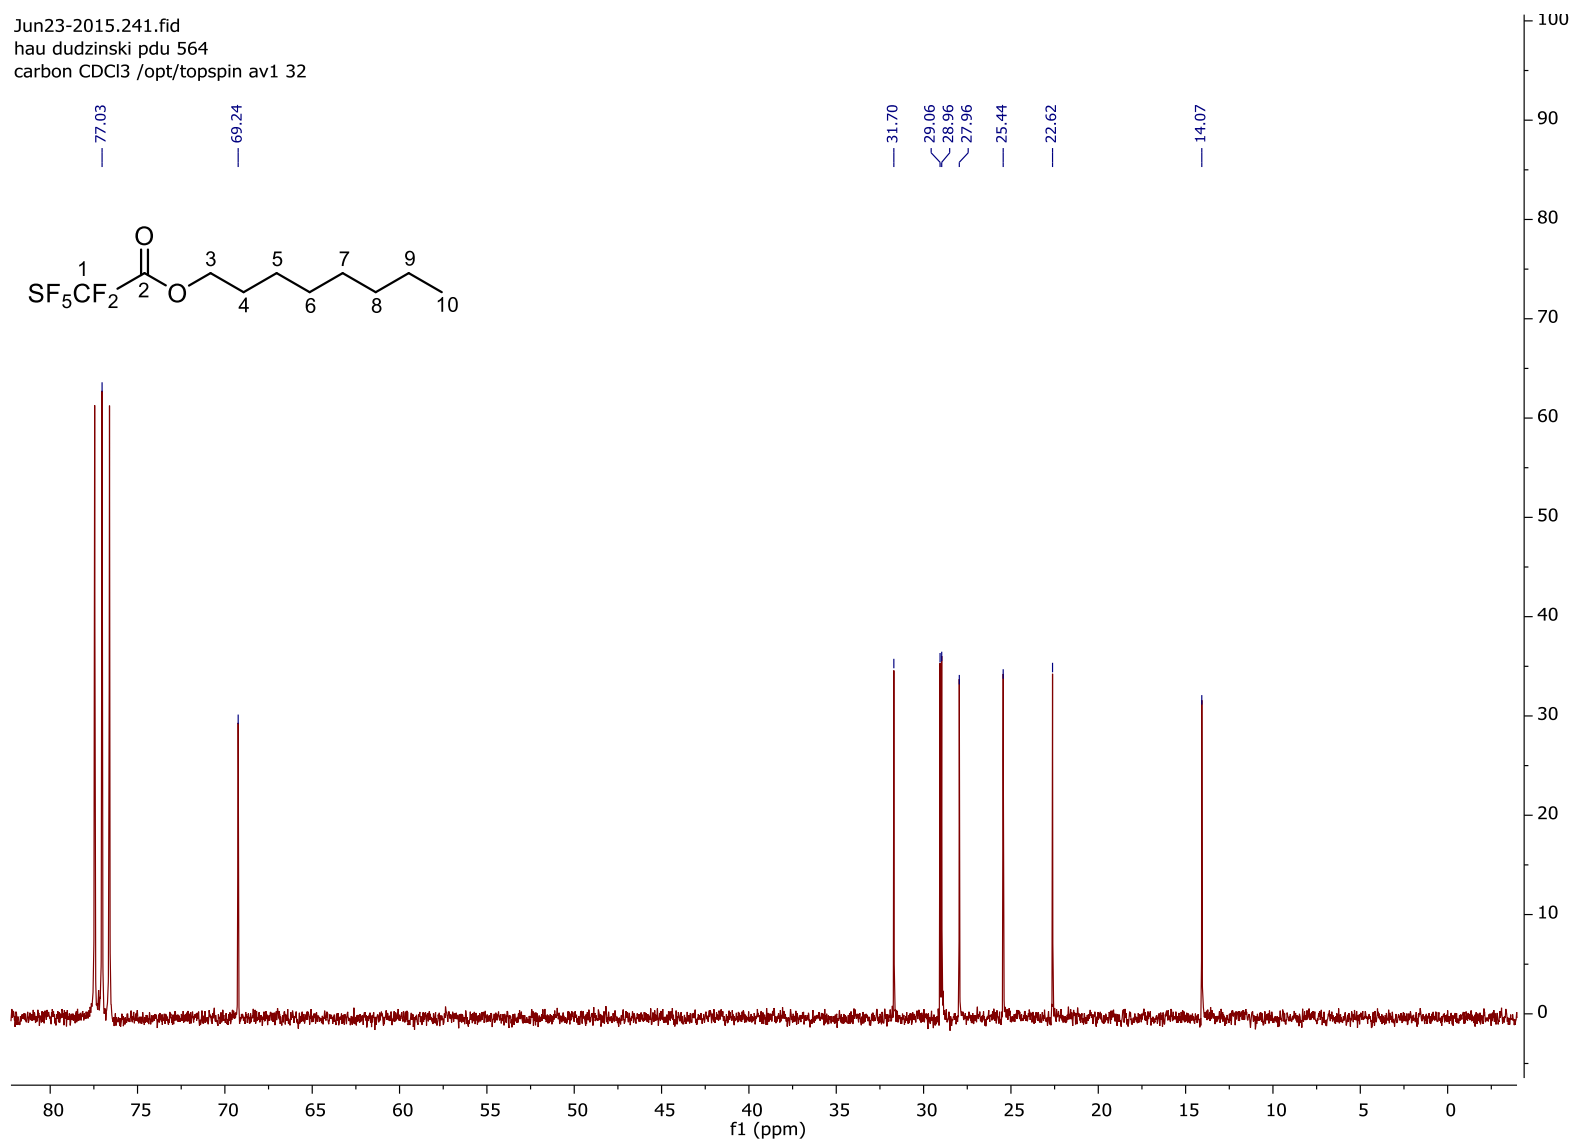

<sup>19</sup>F NMR spectrum of compound **11** – positive part

Jun23-2015.244.fid  
hau dudzinski pdu 564  
f19\_200\_to\_0 CDCl3 /opt/topspin av1 32

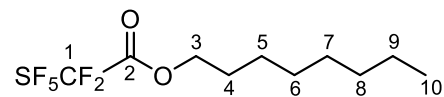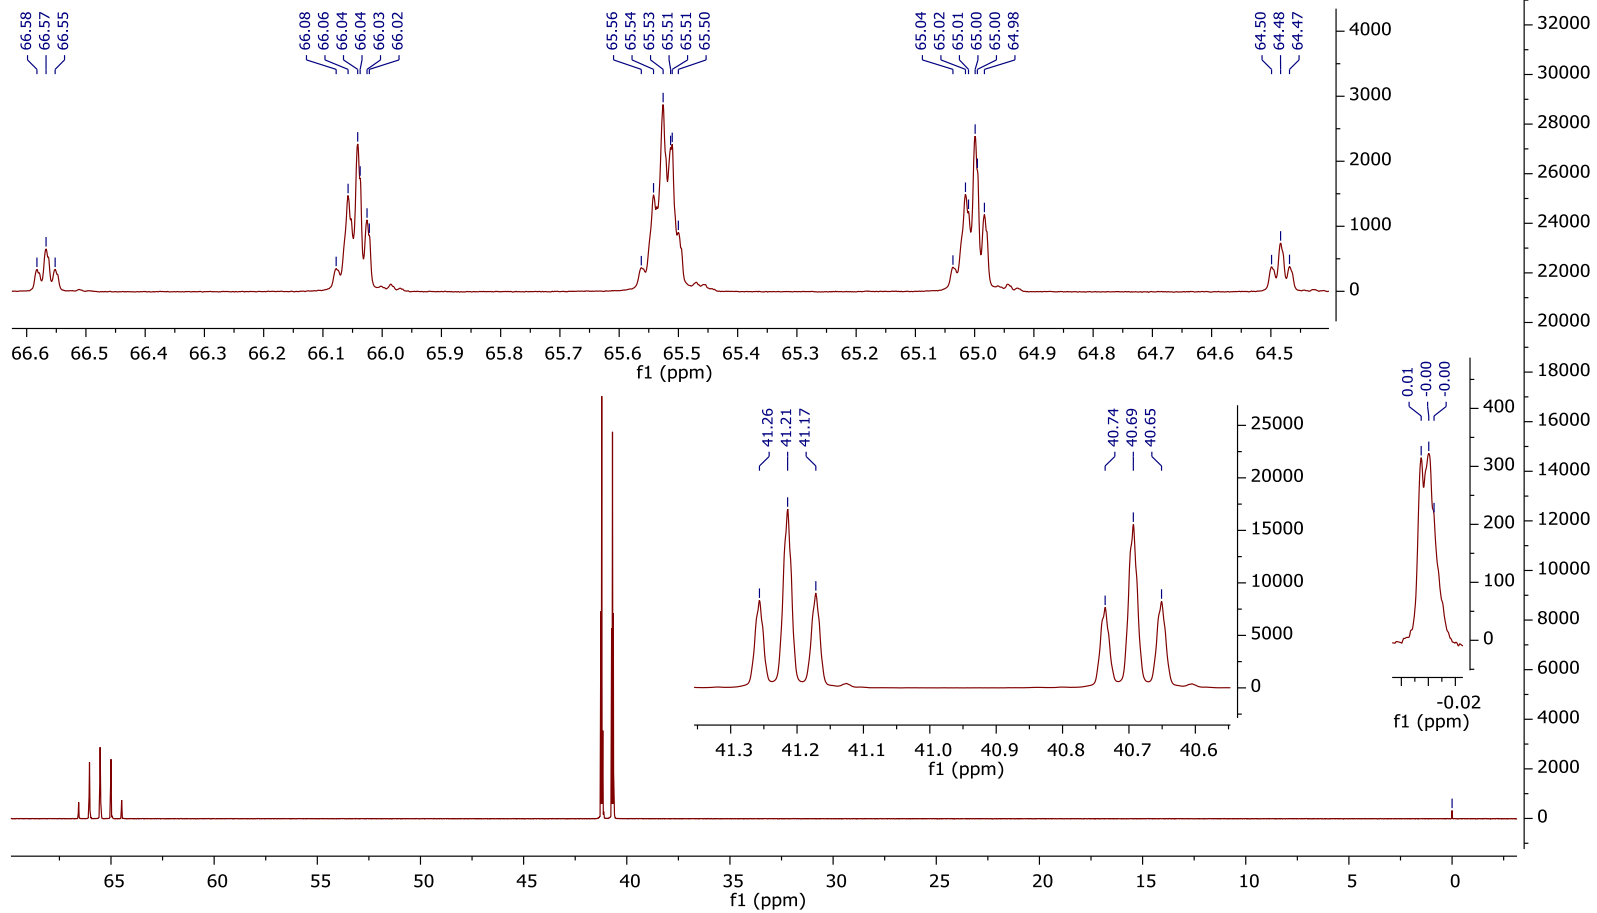

# <sup>19</sup>F NMR spectrum of compound **11** – negative part

Jun23-2015.246.fid  
hau dudzinski pdu 564  
f19\_0\_to\_m200 CDCl3 /opt/topspin av1 32

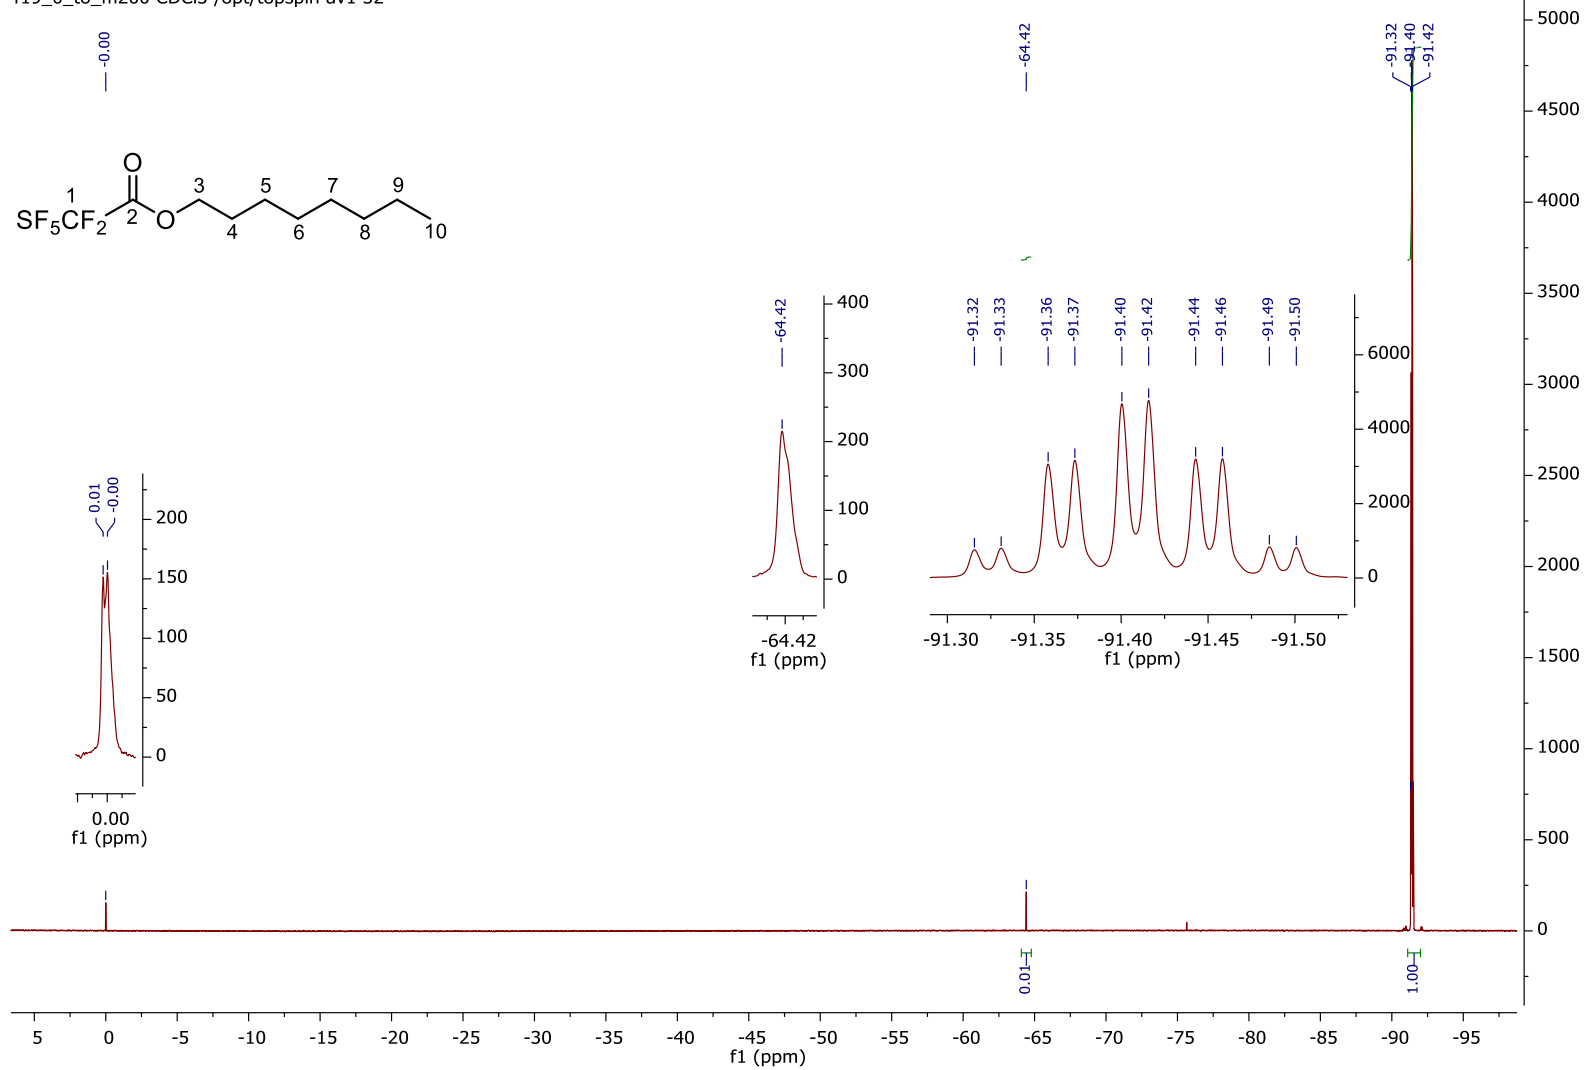

<sup>1</sup>H NMR spectrum of 1,1-difluoro-1-(pentafluoro-λ<sup>6</sup>-sulfaneyl)dodec-3-yn-2-one (12)

Jul01-2015.212.fid  
hau dudzinski pdu 569  
proton CDCl3 /opt/topspin av1.45

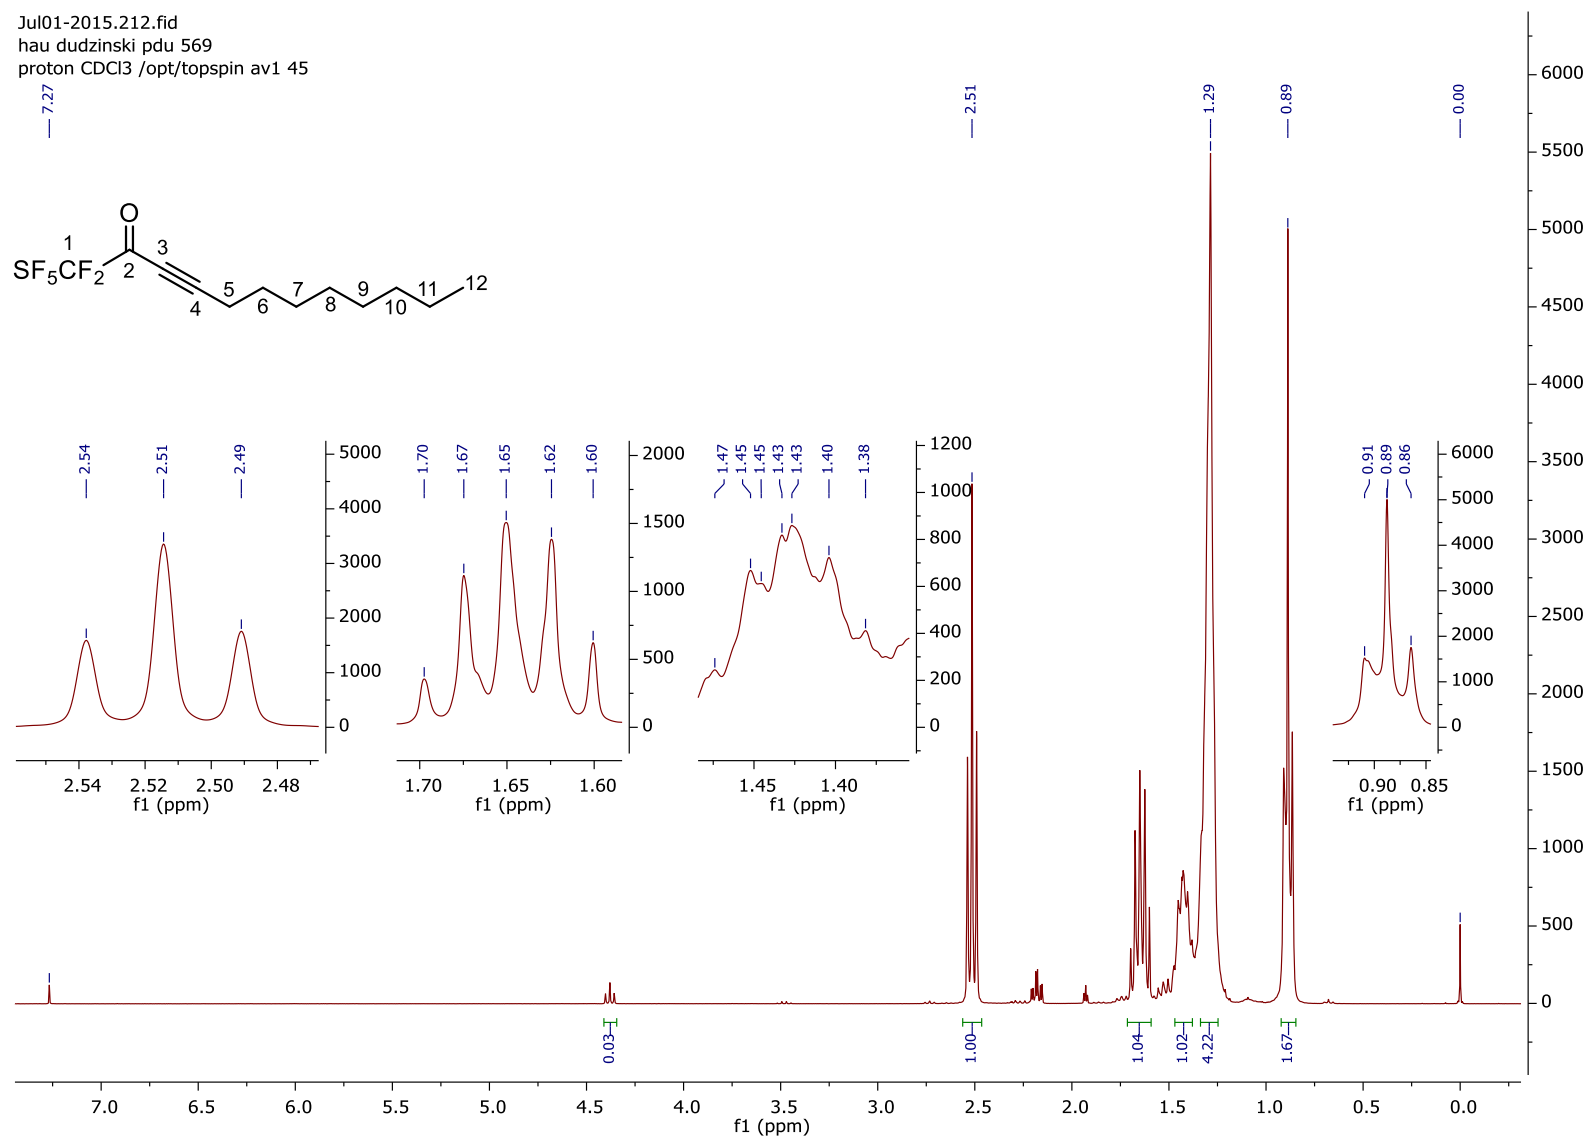

$^{13}\text{C}$  NMR spectrum of 1,1-difluoro-1-(pentafluoro- $\lambda^6$ -sulfaneyl)dodec-3-yn-2-one (**12**)

Jul01-2015.211.fid  
hau dudzinski pdu 569  
carbon CDCl<sub>3</sub> /opt/topspin av1 45

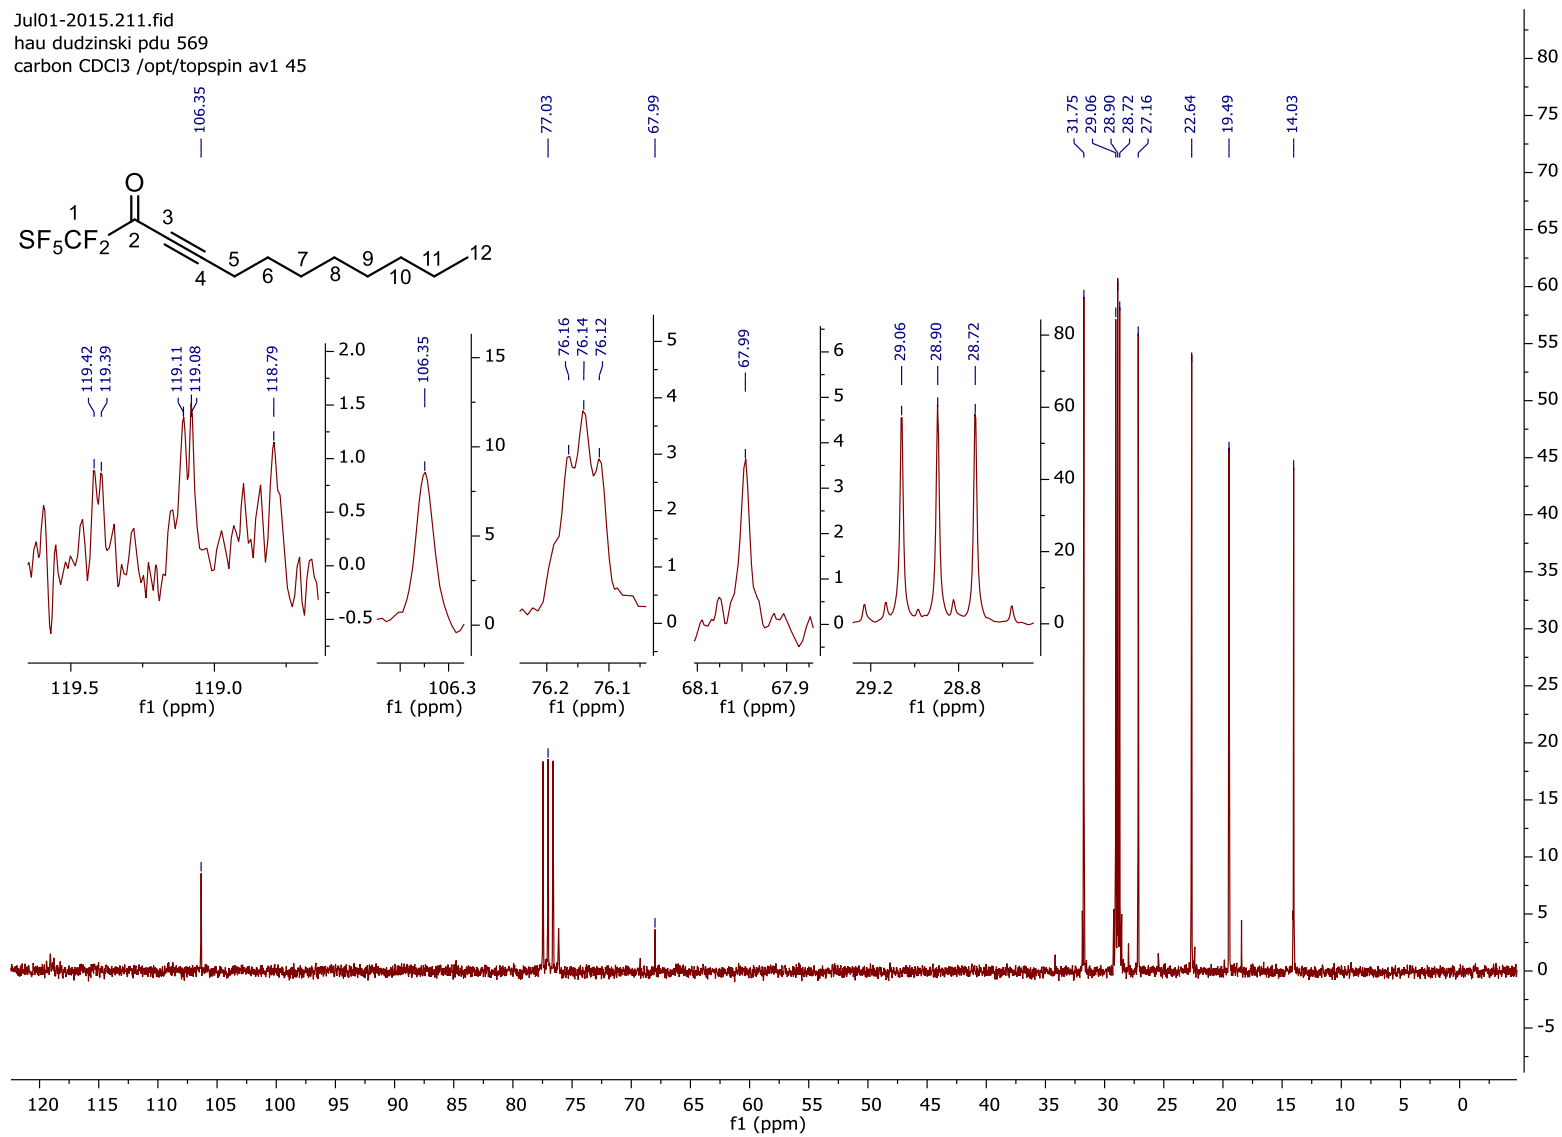

<sup>19</sup>F NMR spectrum of 1,1-difluoro-1-(pentafluoro-λ<sup>6</sup>-sulfanyl)dodec-3-yn-2-one (**12**) – positive part

Jul01-2015.213.fid  
hau dudzinski pdu 569  
f19cpd\_200\_to\_0 CDCl<sub>3</sub> /opt/topspin av1 45

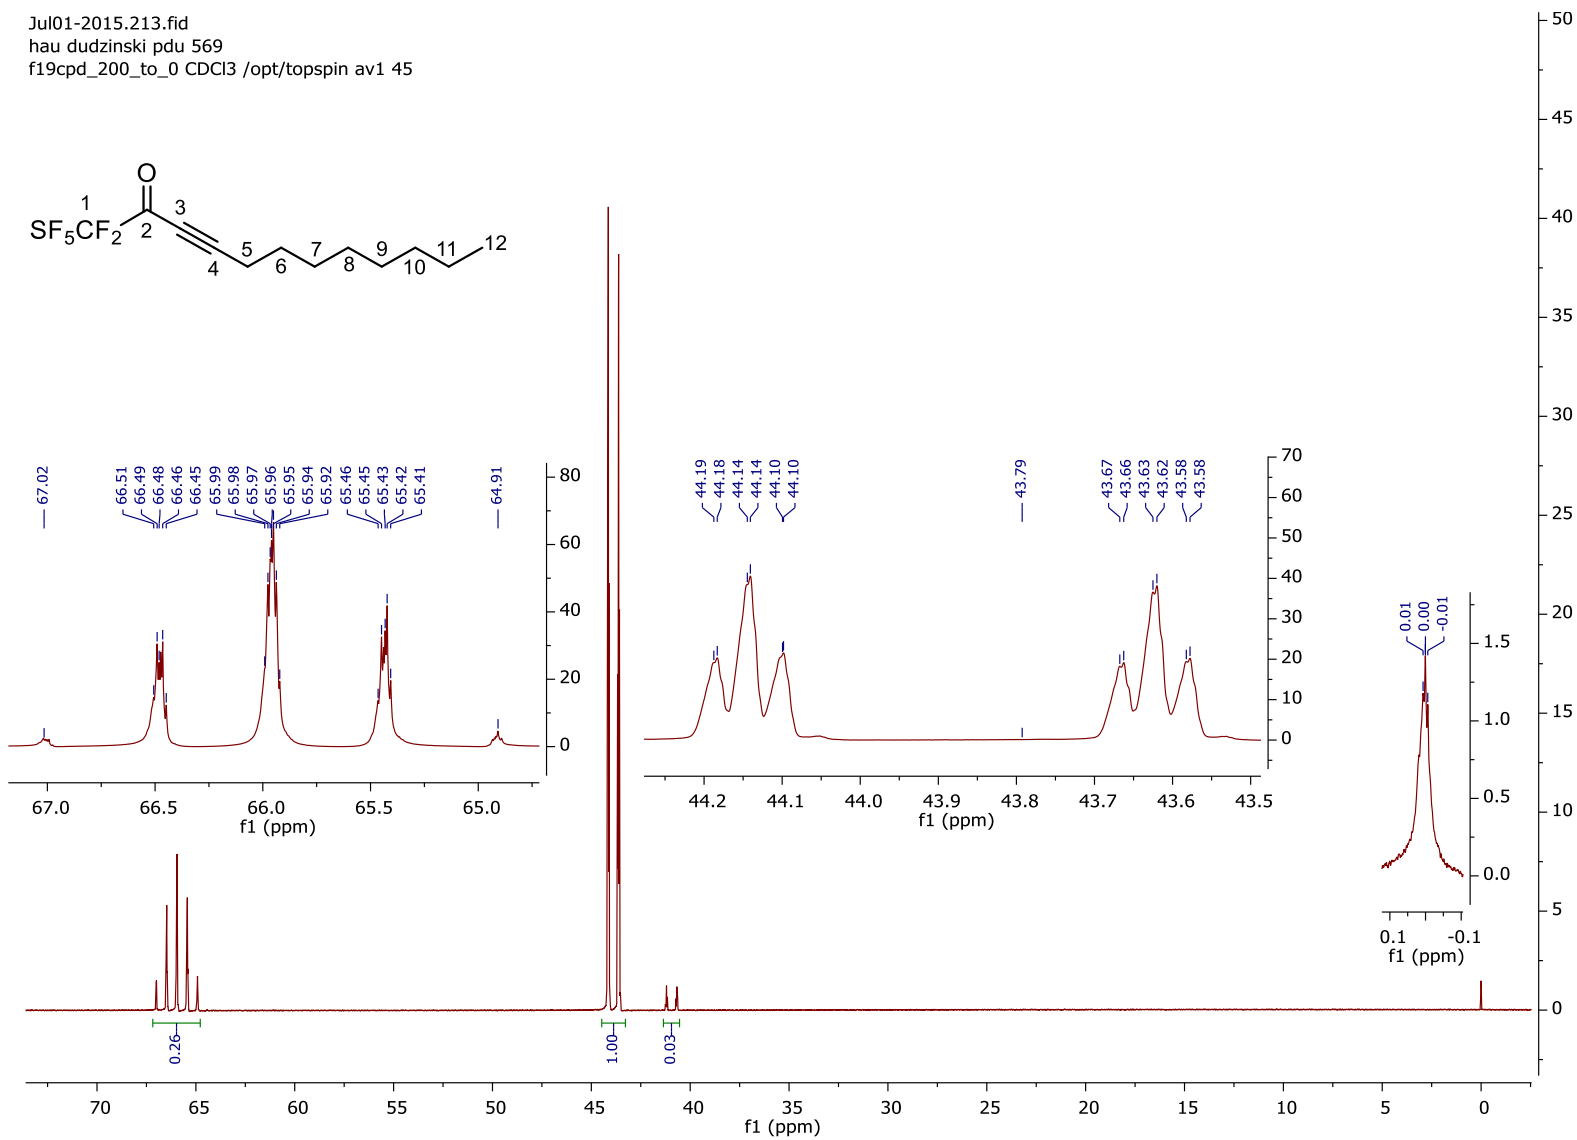



<sup>19</sup>F NMR spectrum of 1,1-difluoro-1-(pentafluoro-λ<sup>6</sup>-sulfaneyl)dodec-3-yn-2-one (**12**) – negative part

Jul01-2015.216.fid  
hau dudzinski pdu 569  
f19\_0\_to\_m200 CDCl3 /opt/topspin av1 45

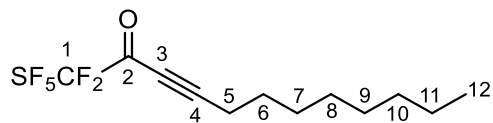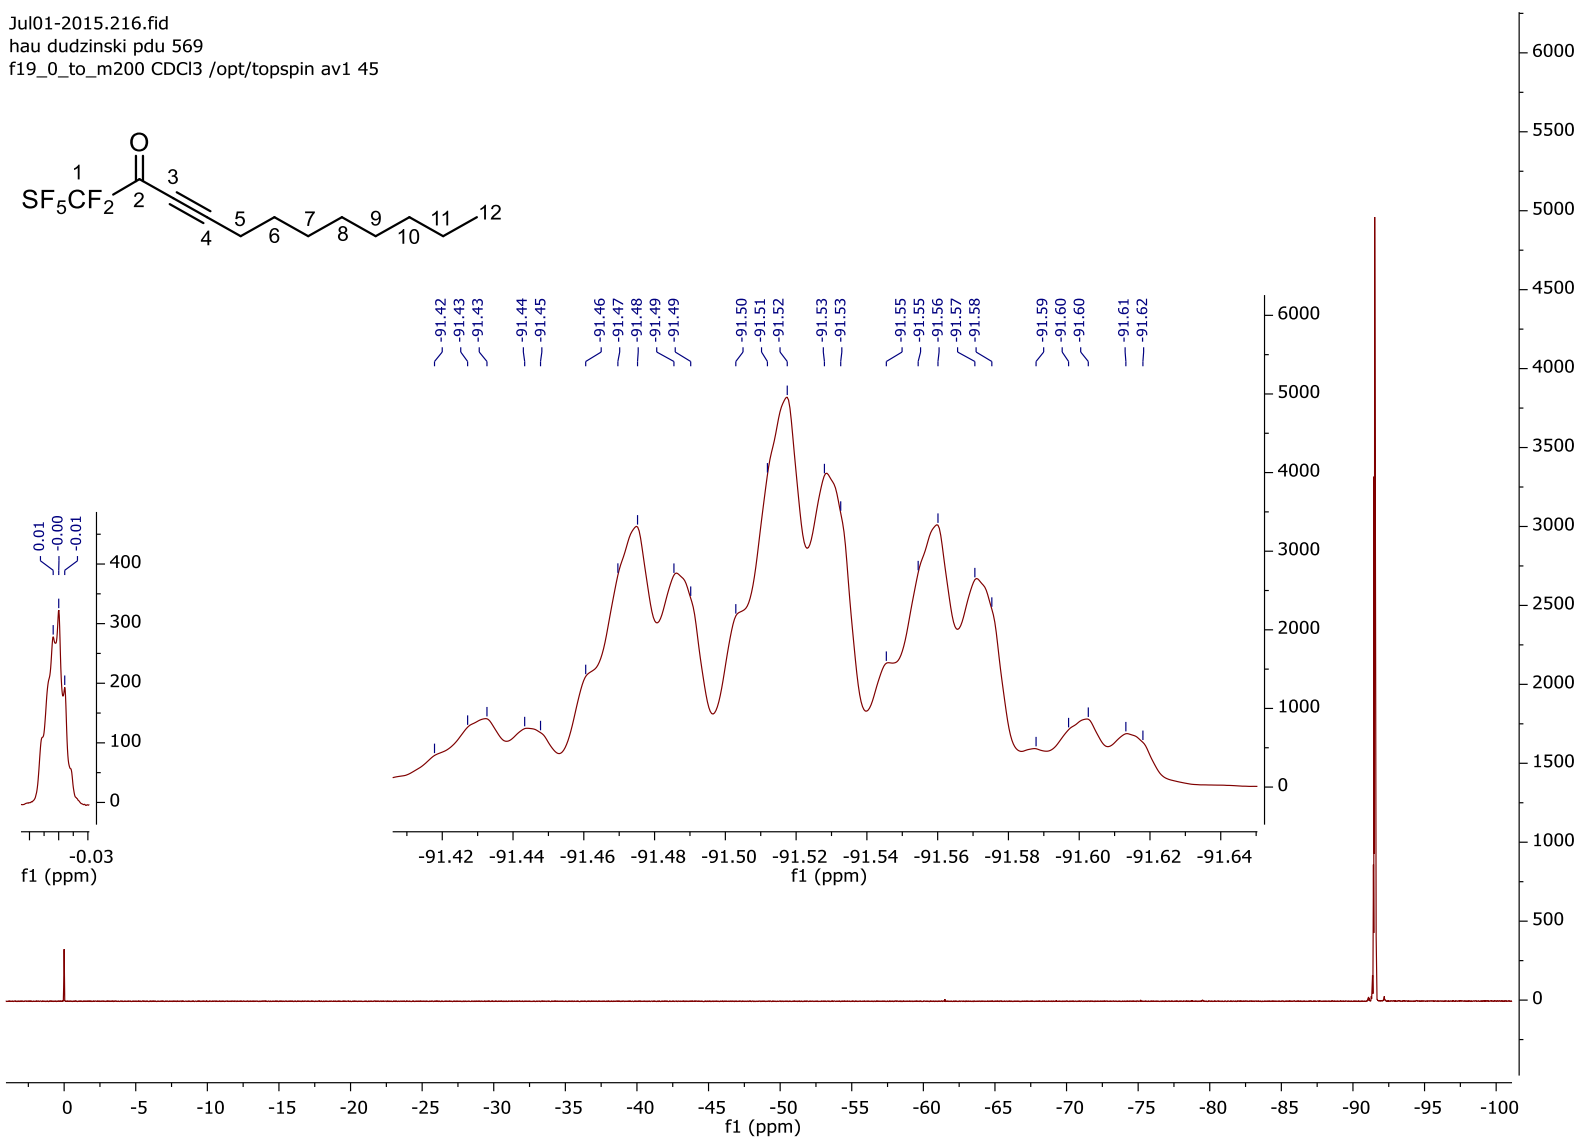

<sup>1</sup>H NMR spectrum of 1,1-Difluoro-1-(pentafluoro-λ<sup>6</sup>-sulfanyl)dodec-3-yn-2-ol (**13**)

Jul02-2015.222.fid  
hau dudzinski pdu 570  
proton CDCl<sub>3</sub> /opt/topspin av1 46

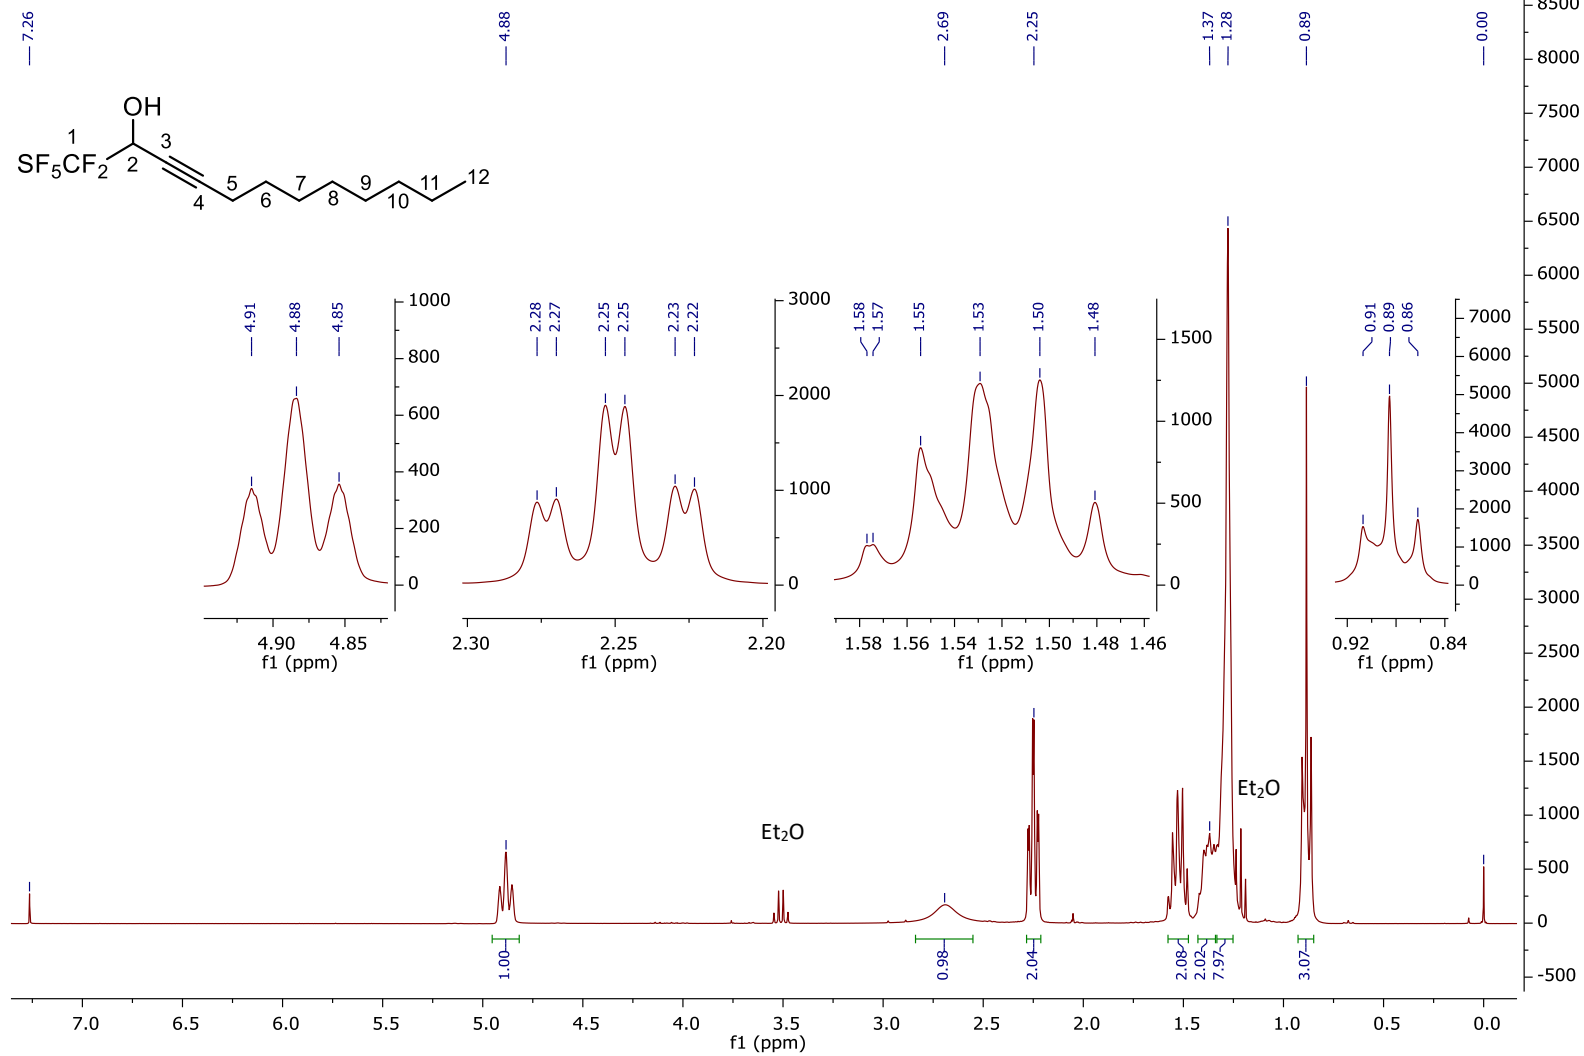

<sup>13</sup>C NMR spectrum of 1,1-Difluoro-1-(pentafluoro-λ<sup>6</sup>-sulfanyl)dodec-3-yn-2-ol (**13**)

Jul02-2015.221.fid  
hau dudzinski pdu 570  
carbon CDCl<sub>3</sub> /opt/topspin av1 46

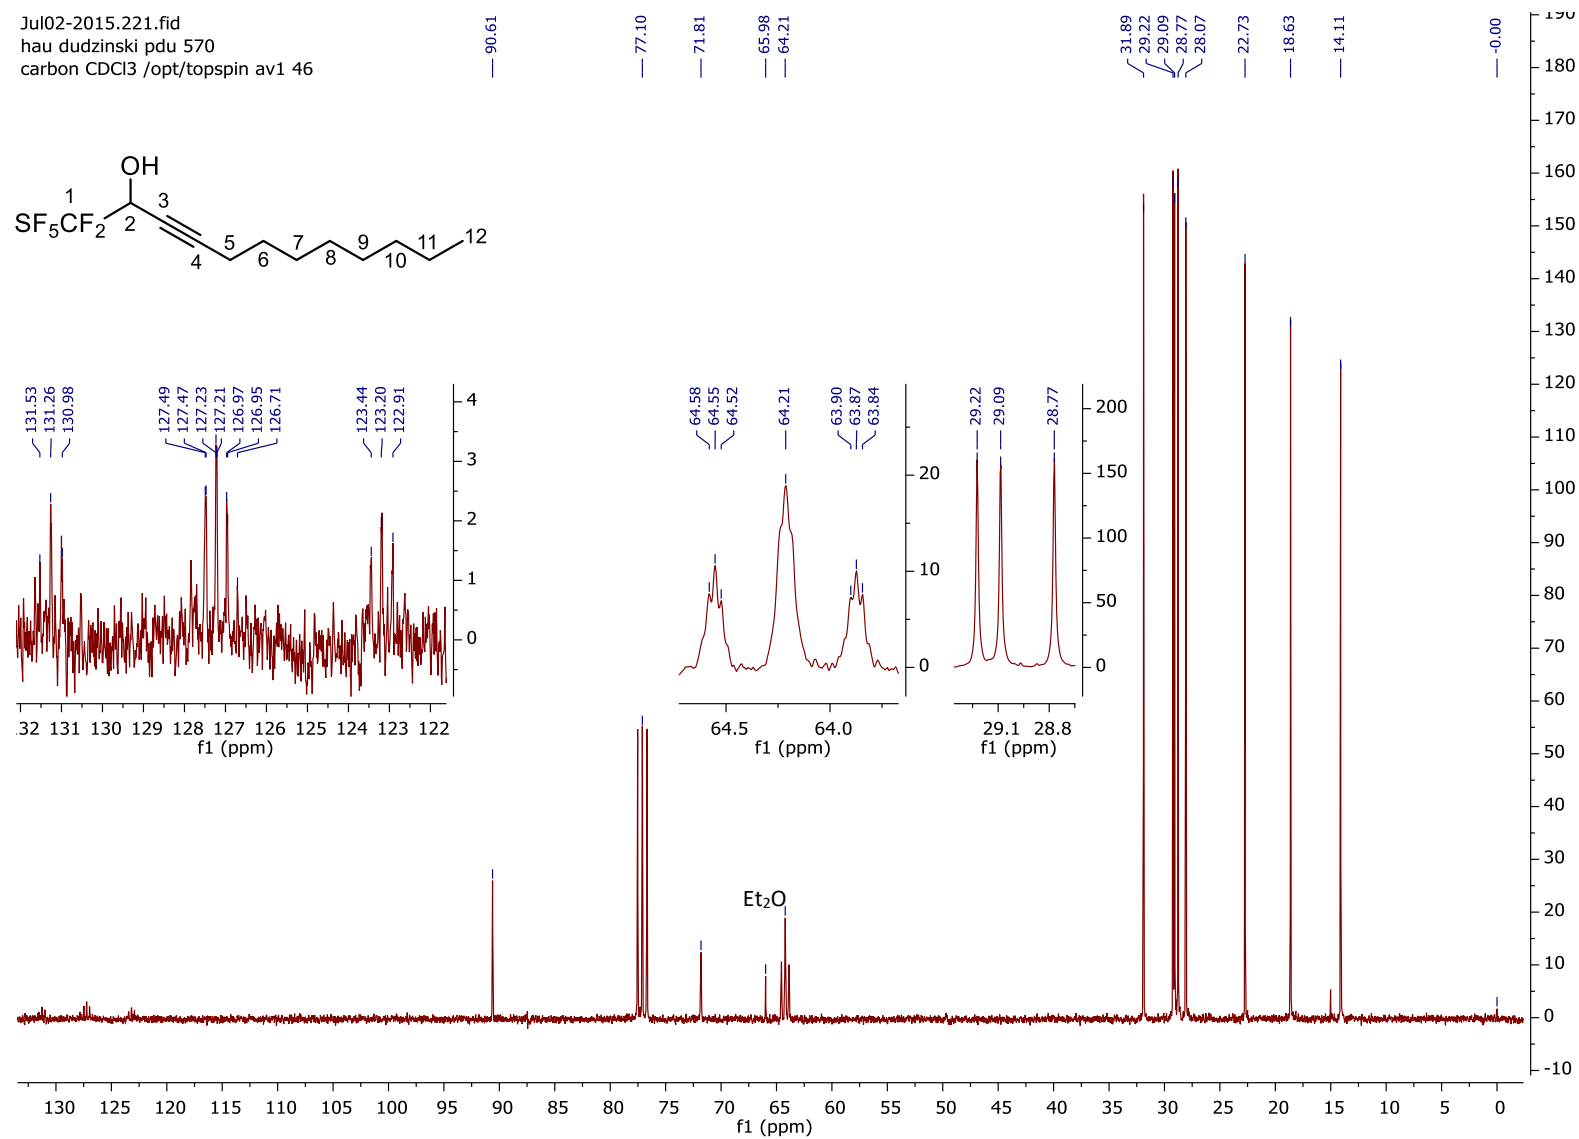

<sup>19</sup>F NMR spectrum of 1,1-Difluoro-1-(pentafluoro-λ<sup>6</sup>-sulfanyl)dodec-3-yn-2-ol (**13**) – positive part

Jul02-2015.224.fid  
hau dudzinski pdu 570  
f19\_200\_to\_0 CDCl3 /opt/topspin av1 46

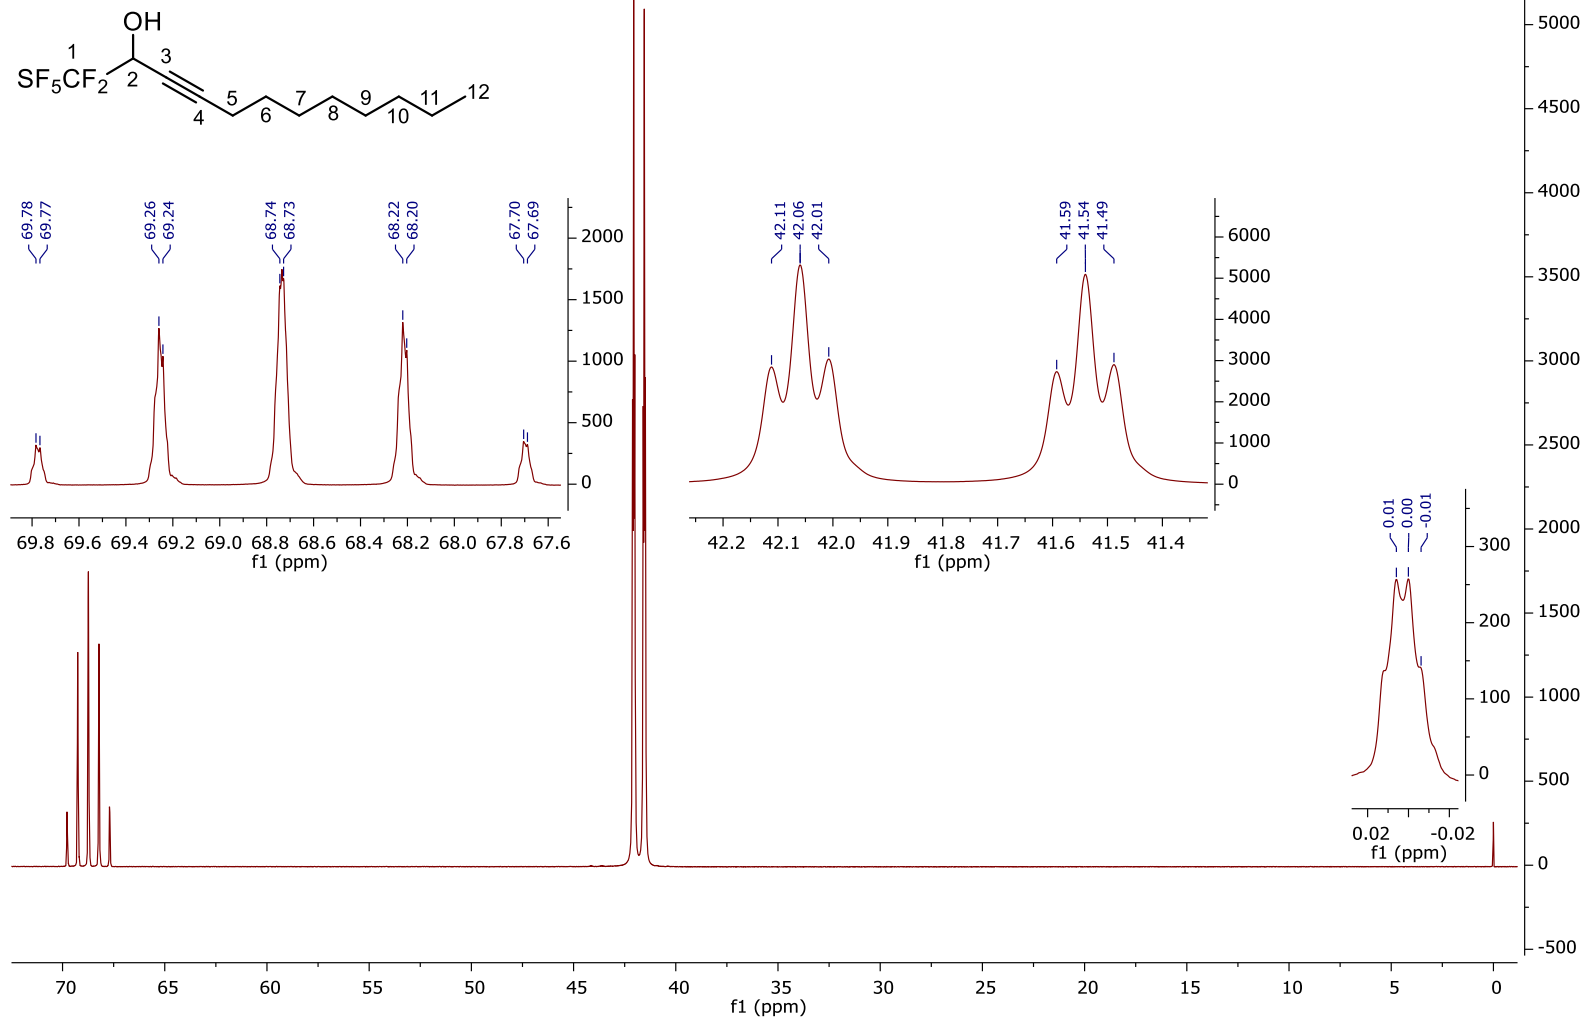

<sup>19</sup>F NMR spectrum of 1,1-Difluoro-1-(pentafluoro-λ<sup>6</sup>-sulfanyl)dodec-3-yn-2-ol (**13**) – negative part

Jul02-2015.225.fid  
hau dudzinski pdu 570  
f19cpd\_0\_to\_m200 CDCl3 /opt/topspin av1 46

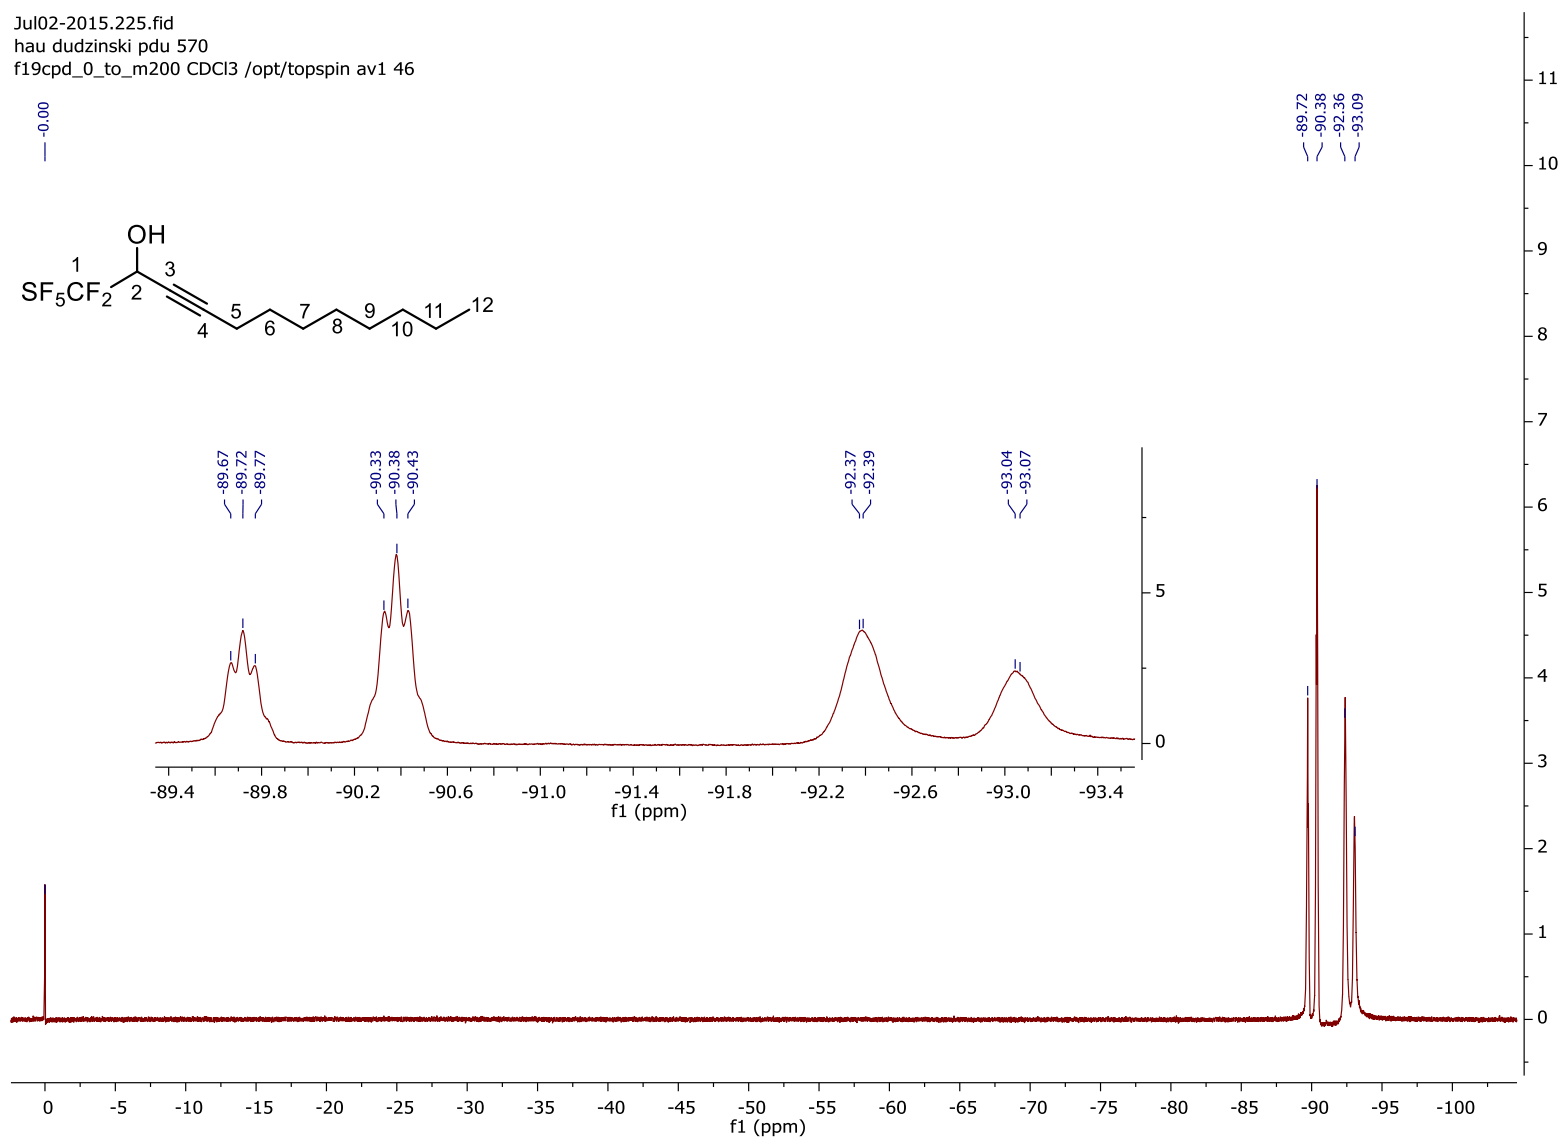

<sup>1</sup>H NMR spectrum of (Z)-1,1-Difluoro-1-(pentafluoro-λ<sup>6</sup>-sulfanyl)dodec-3-en-2-ol (**14**)

Jul06-2015.430.fid  
hau dudzinski pdu 572  
proton CDCl3 /opt/topspin av1 10

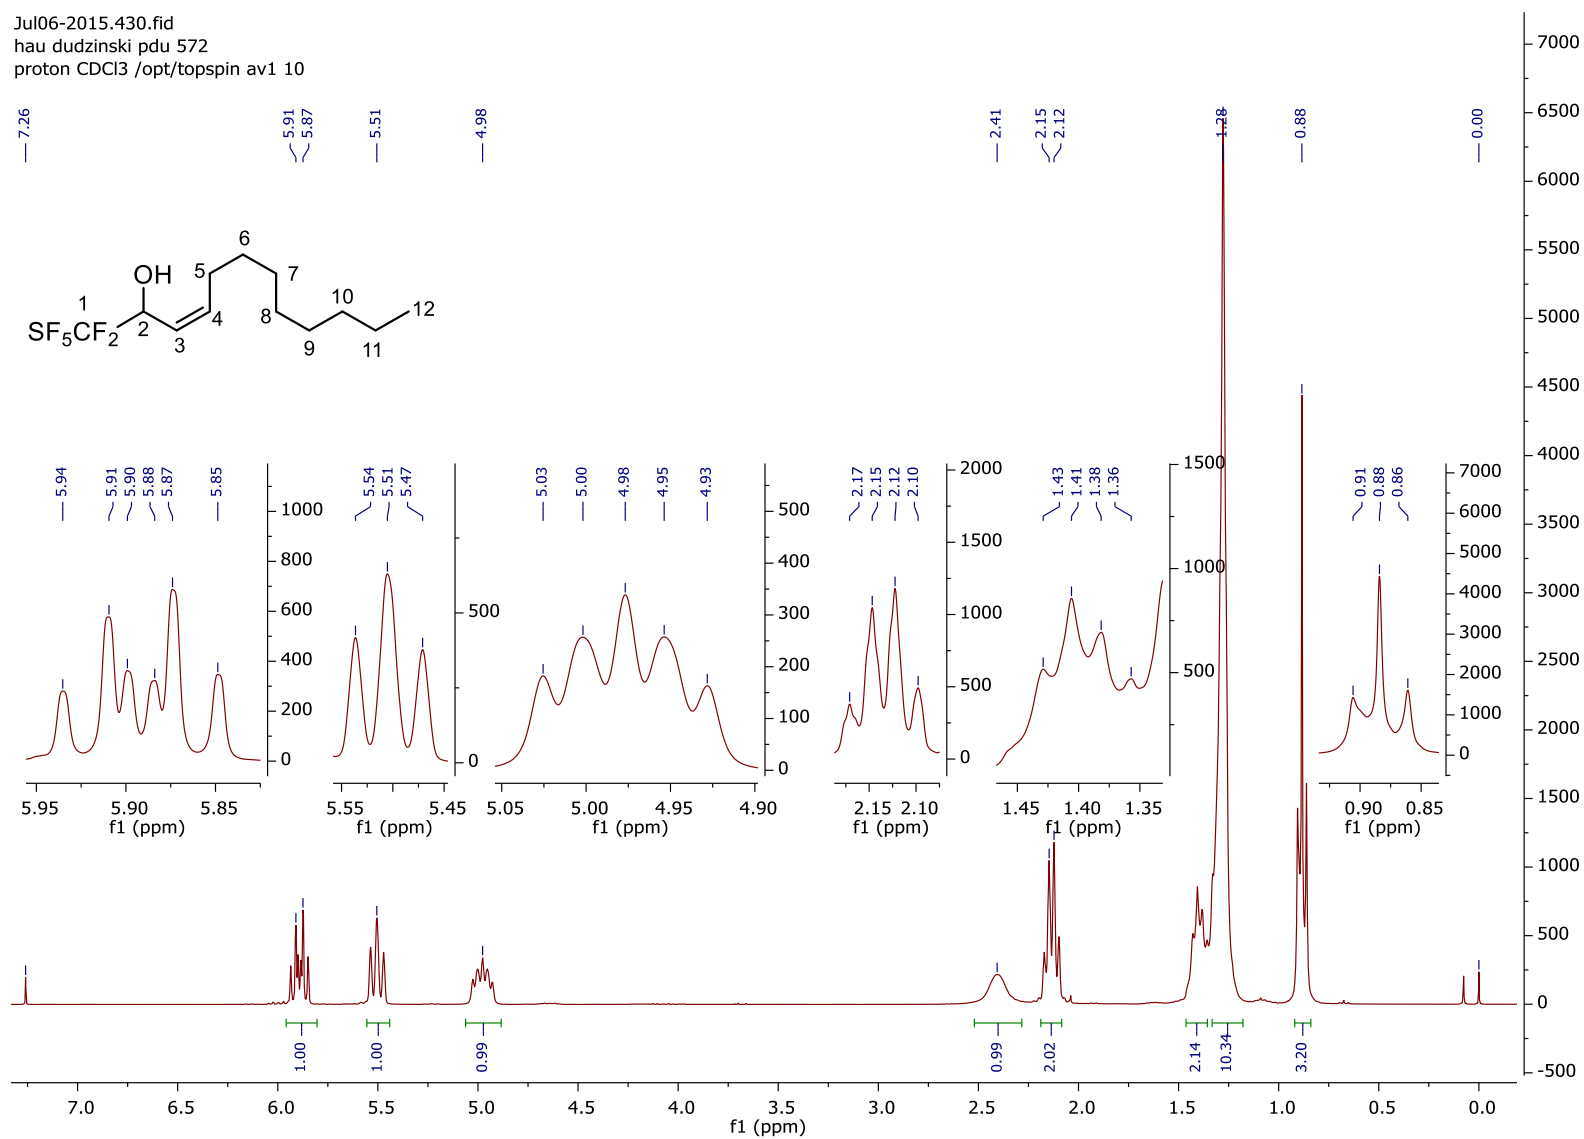

<sup>13</sup>C NMR spectrum of (Z)-1,1-Difluoro-1-(pentafluoro-λ<sup>6</sup>-sulfanyl)dodec-3-en-2-ol (14)

Jul06-2015.431.fid  
hau dudzinski pdu 572  
carbon CDCl<sub>3</sub> /opt/topspin av1 10

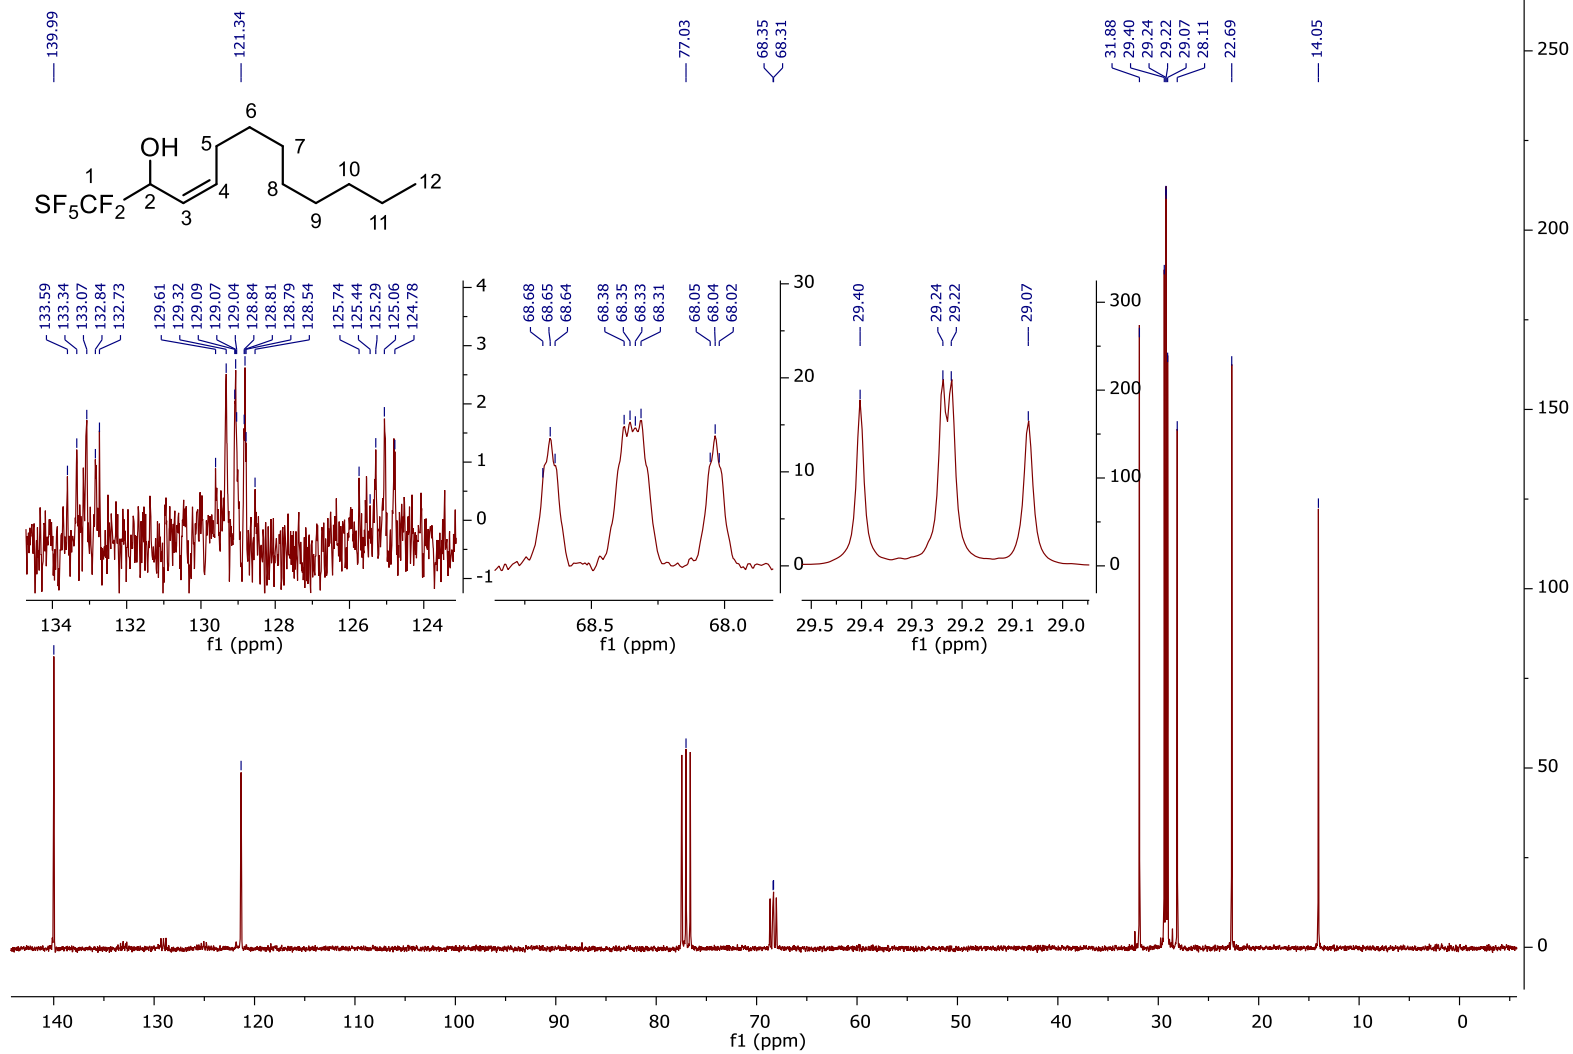

<sup>19</sup>F NMR spectrum of (Z)-1,1-Difluoro-1-(pentafluoro-λ<sup>6</sup>-sulfanyl)dodec-3-en-2-ol (14) – positive part

Jul06-2015.434.fid  
hau dudzinski pdu 572  
f19\_200\_to\_0 CDCl3 /opt/topspin av1 10

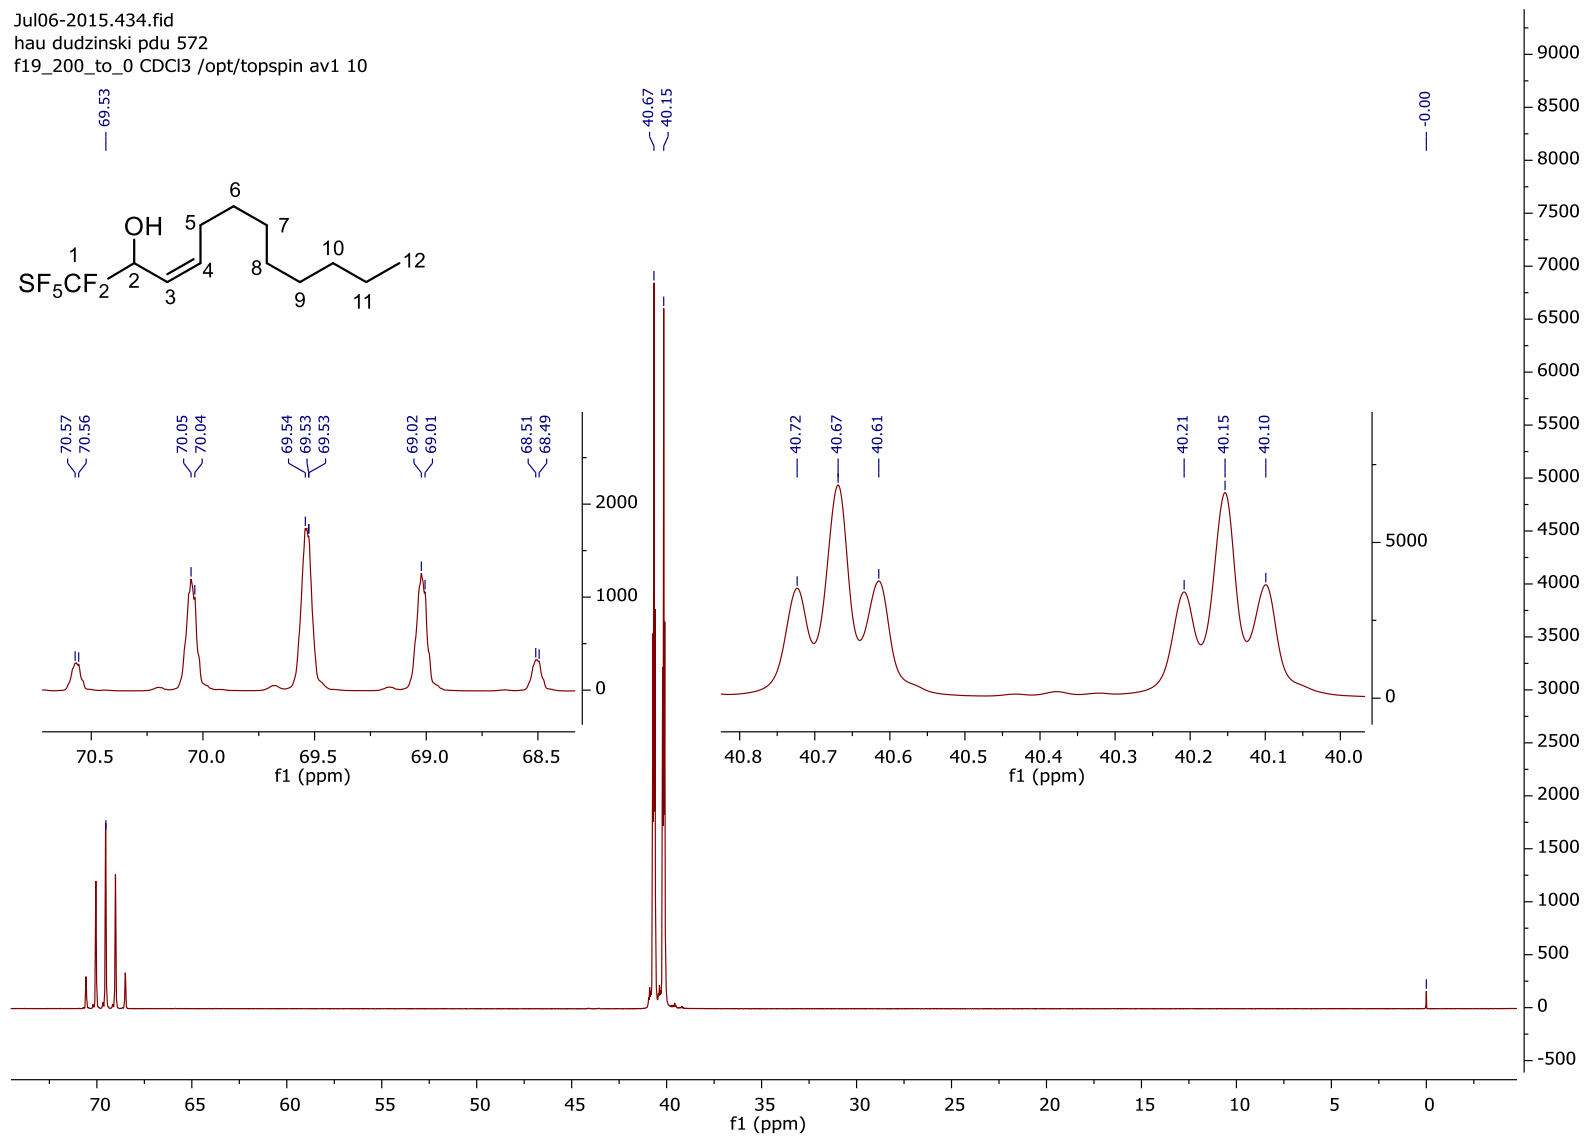



<sup>19</sup>F NMR spectrum of (Z)-1,1-Difluoro-1-(pentafluoro-λ<sup>6</sup>-sulfanyl)dodec-3-en-2-ol (**14**) – negative part

Jul06-2015.435.fid  
hau dudzinski pdu 572  
f19cpd\_0\_to\_m200 CDCl<sub>3</sub> /opt/topspin av1 10

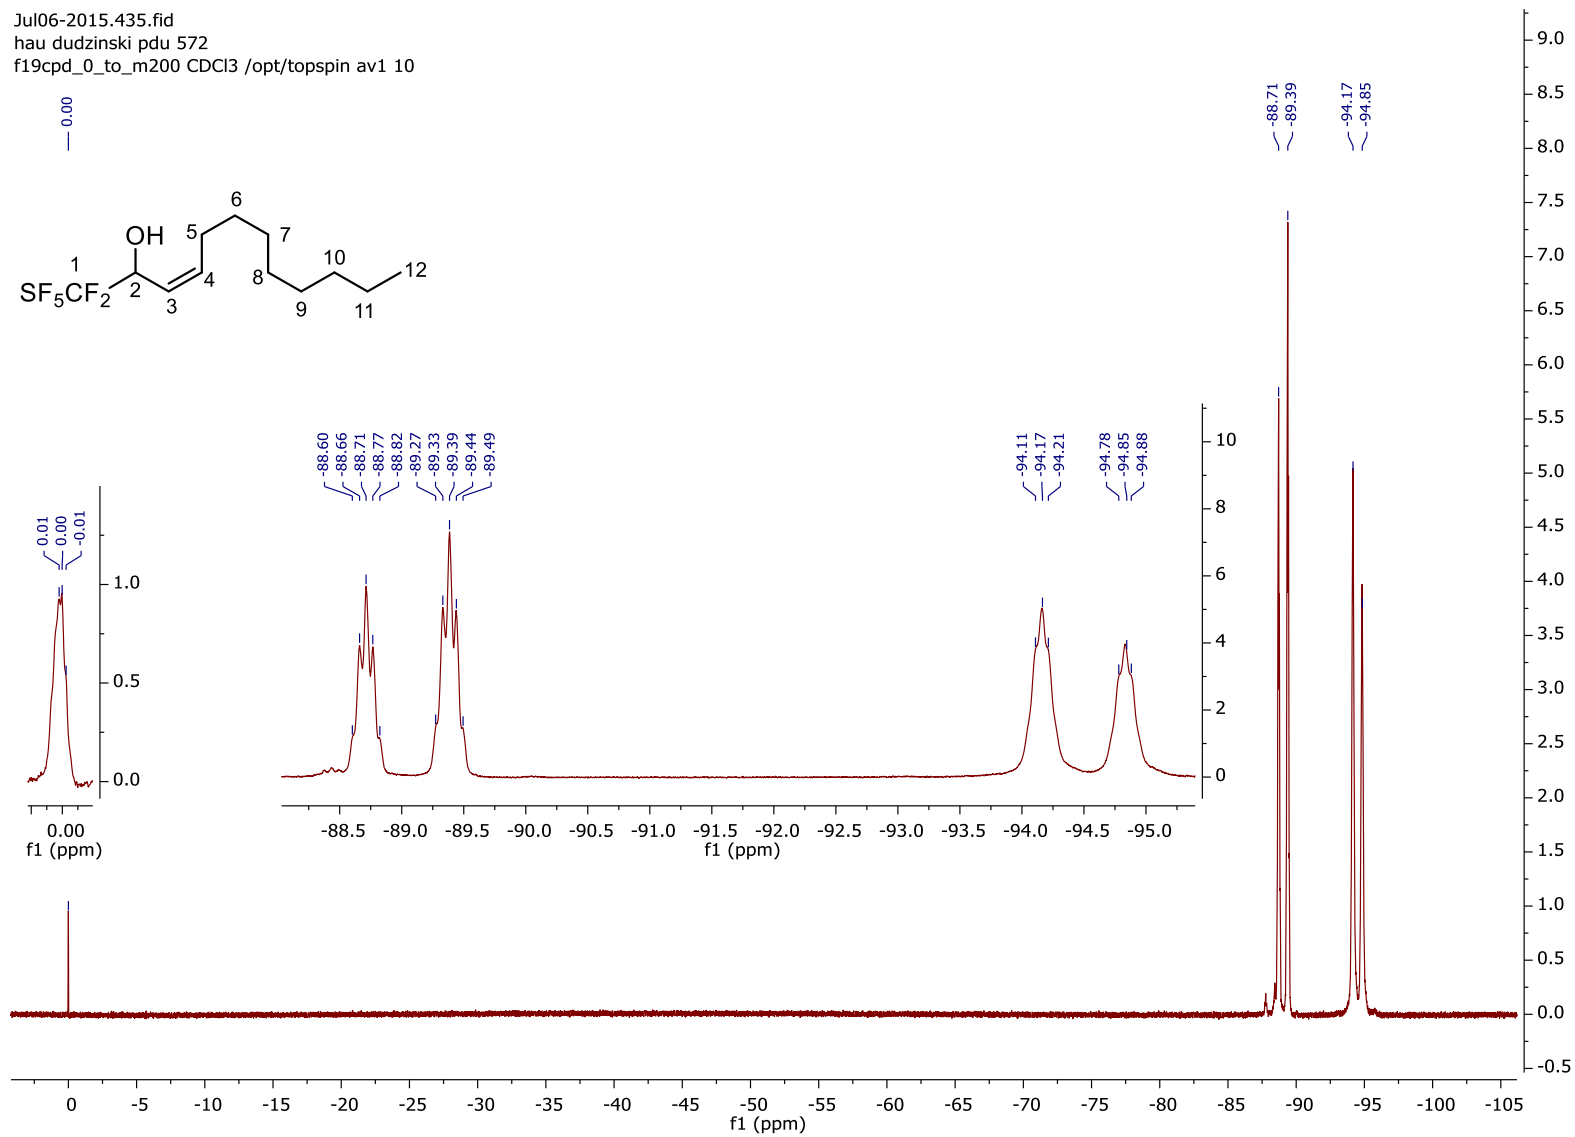

<sup>1</sup>H NMR spectrum of (Z)-1,1-Difluoro-1-(pentafluoro-λ<sup>6</sup>-sulfanyl)dodec-3-en-2-yl methanesulfonate (**15**)

Jul07-2015.500.fid  
hau dudzinski pdu 574  
proton CDCl<sub>3</sub> /opt/topspin av1 57

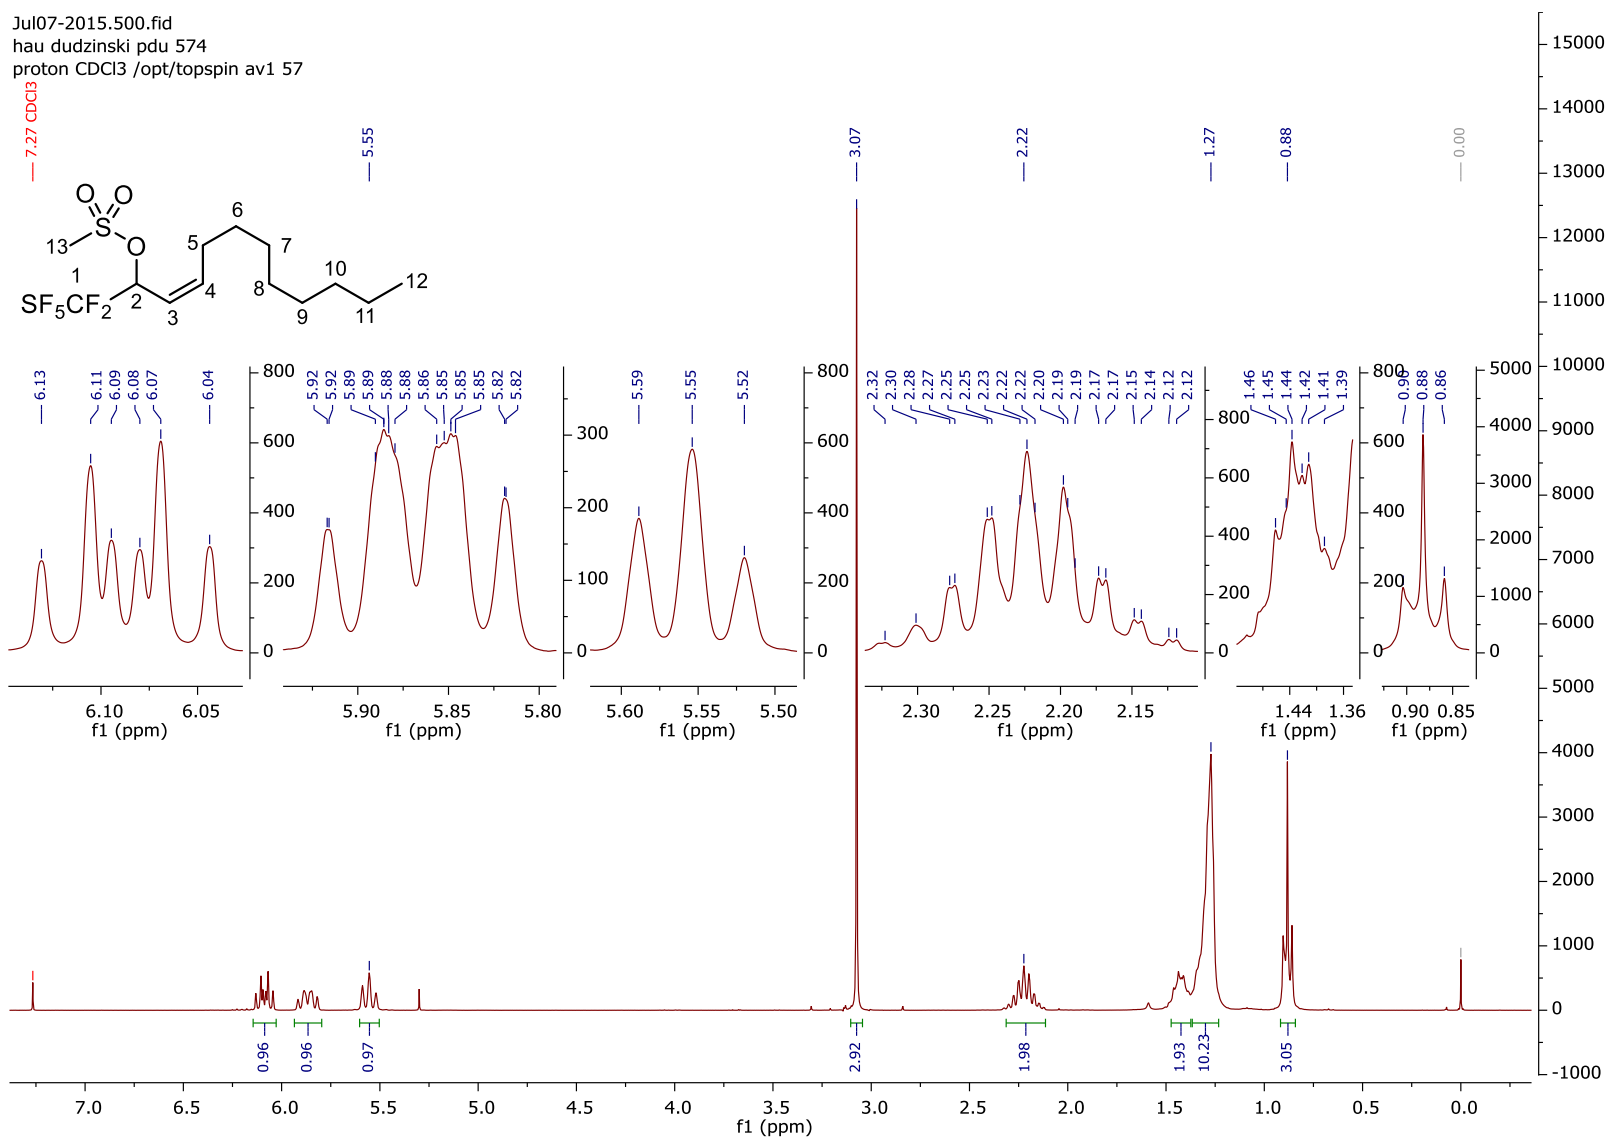

$^{13}\text{C}$  NMR spectrum of (*Z*)-1,1-Difluoro-1-(pentafluoro- $\lambda^6$ -sulfanyl)dodec-3-en-2-yl methanesulfonate (**15**)

Jul07-2015.501.fid  
hau dudzinski pdu 574  
carbon CDCl<sub>3</sub> /opt/topspin av1 57

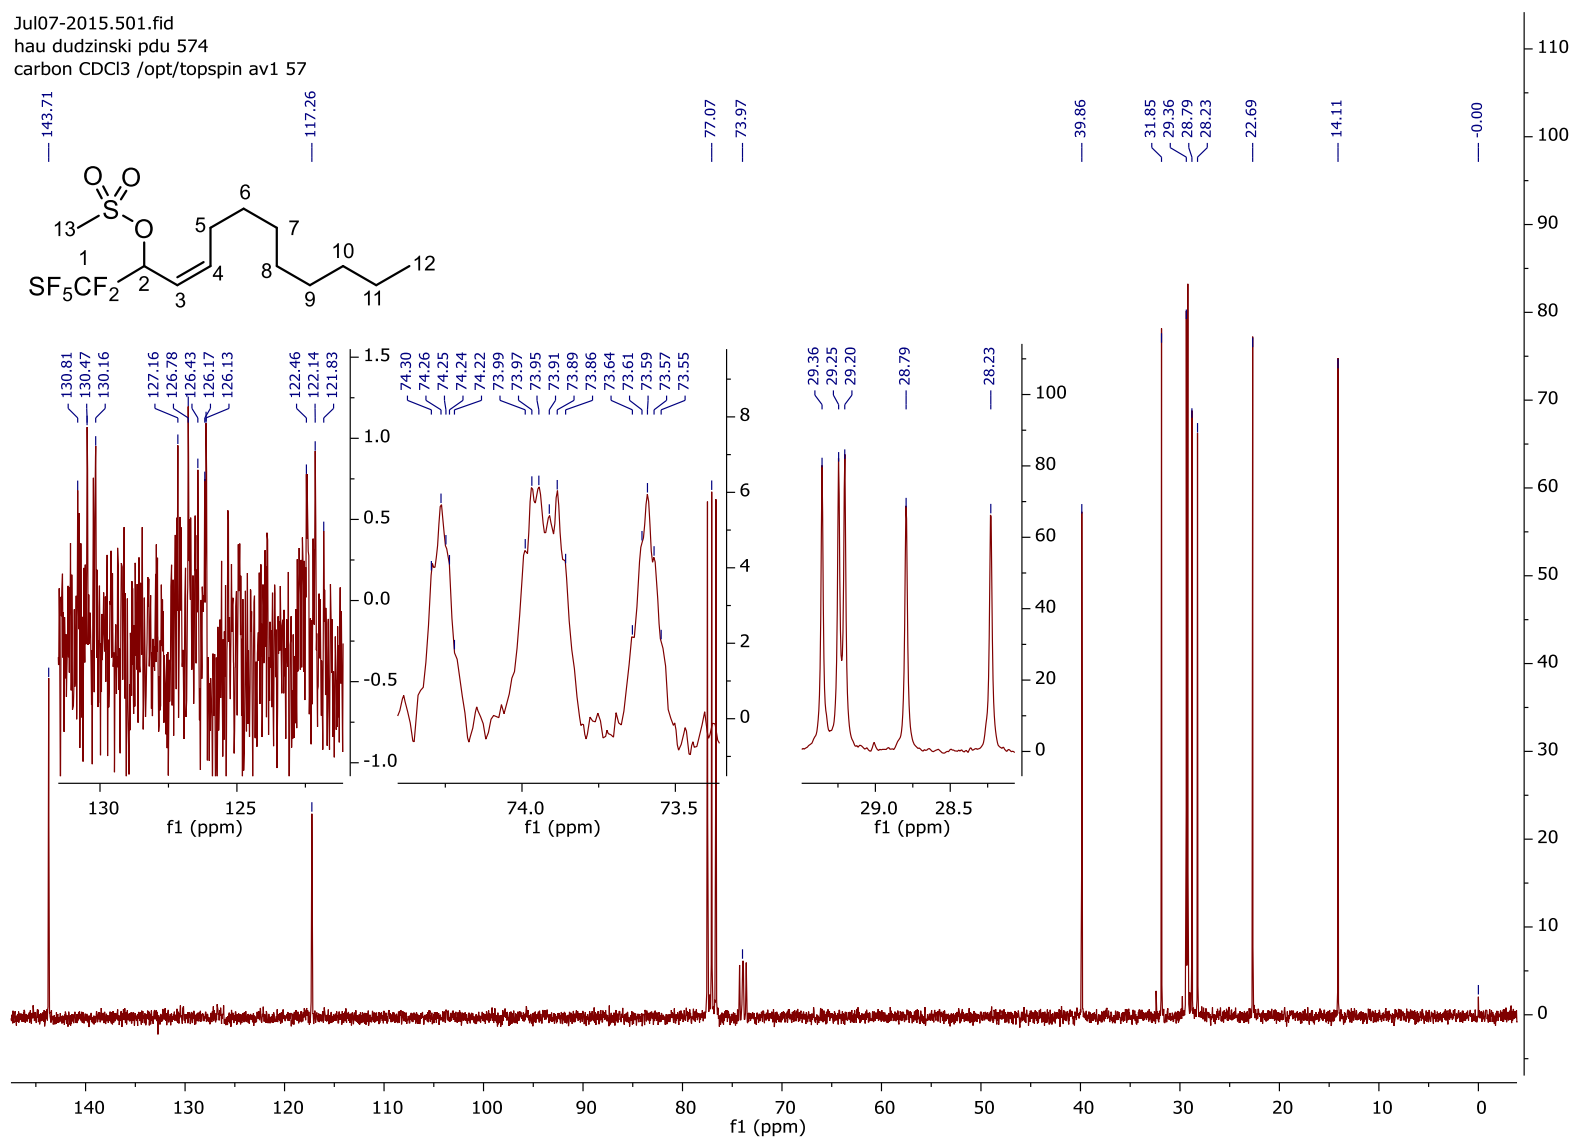

$^{19}\text{F}$  NMR spectrum of (*Z*)-1,1-Difluoro-1-(pentafluoro- $\lambda^6$ -sulfanyl)dodec-3-en-2-yl methanesulfonate (**15**) – positive part

Ju107-2015.504.fid  
hau dudzinski pdu 574  
f19\_200\_to\_0 CDCl3 /opt/topspin av1 57

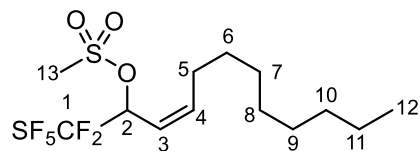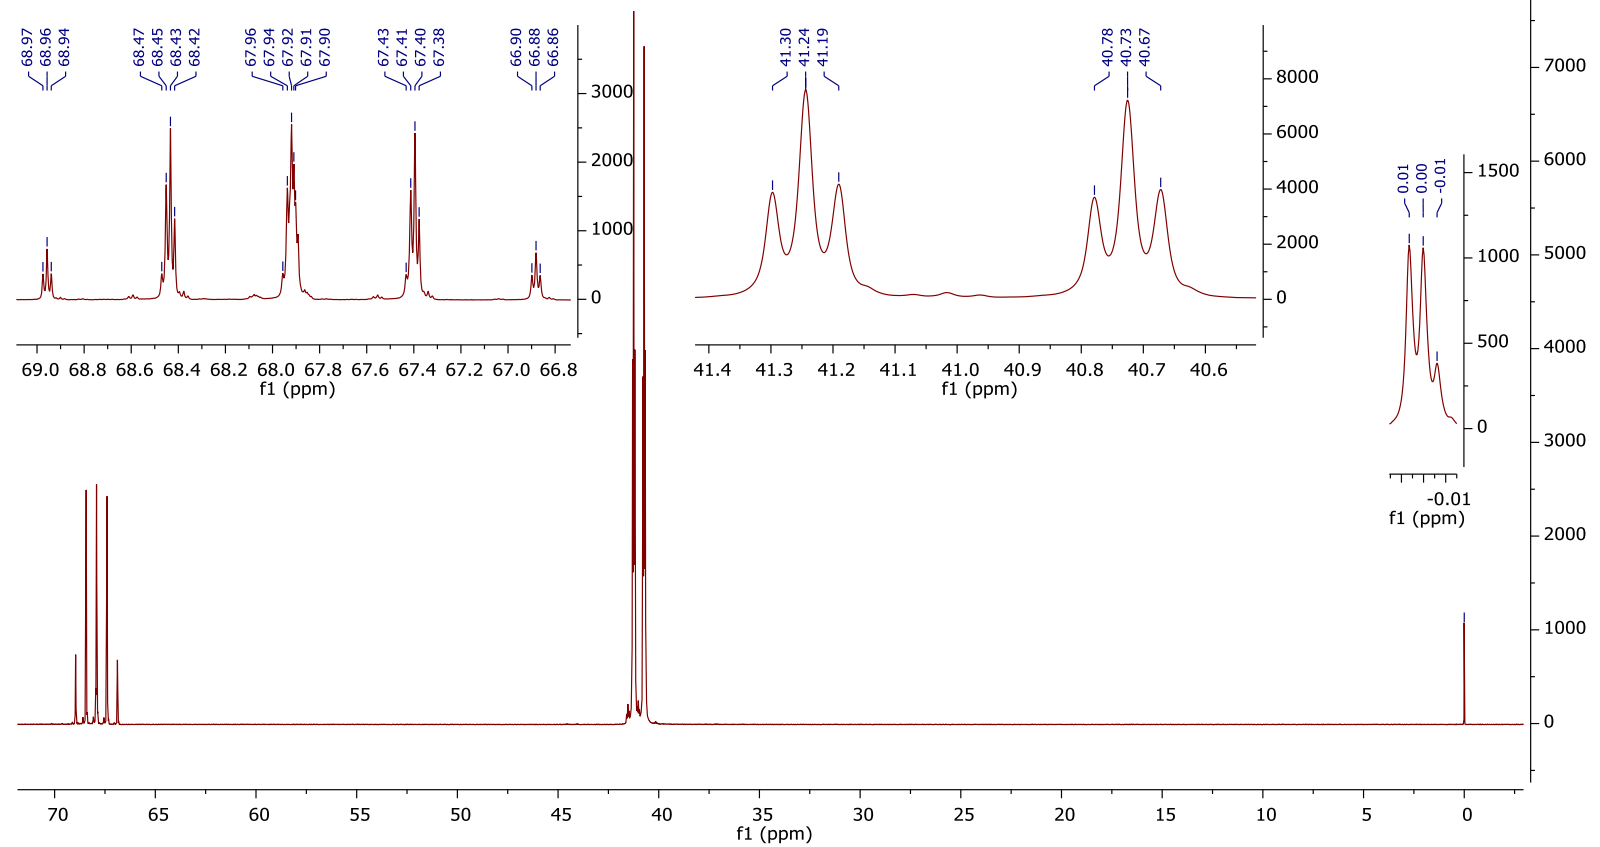

<sup>19</sup>F NMR spectrum of (Z)-1,1-Difluoro-1-(pentafluoro-λ<sup>6</sup>-sulfanyl)dodec-3-en-2-yl methanesulfonate (**15**) – negative part

Jul07-2015.505.fid  
hau dudzinski pdu 574  
f19cpd\_0\_to\_m200 CDCl3 /opt/topspin av1 57

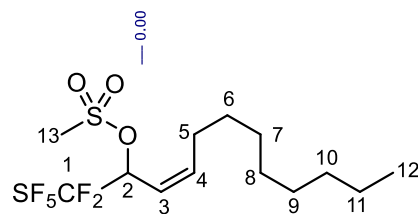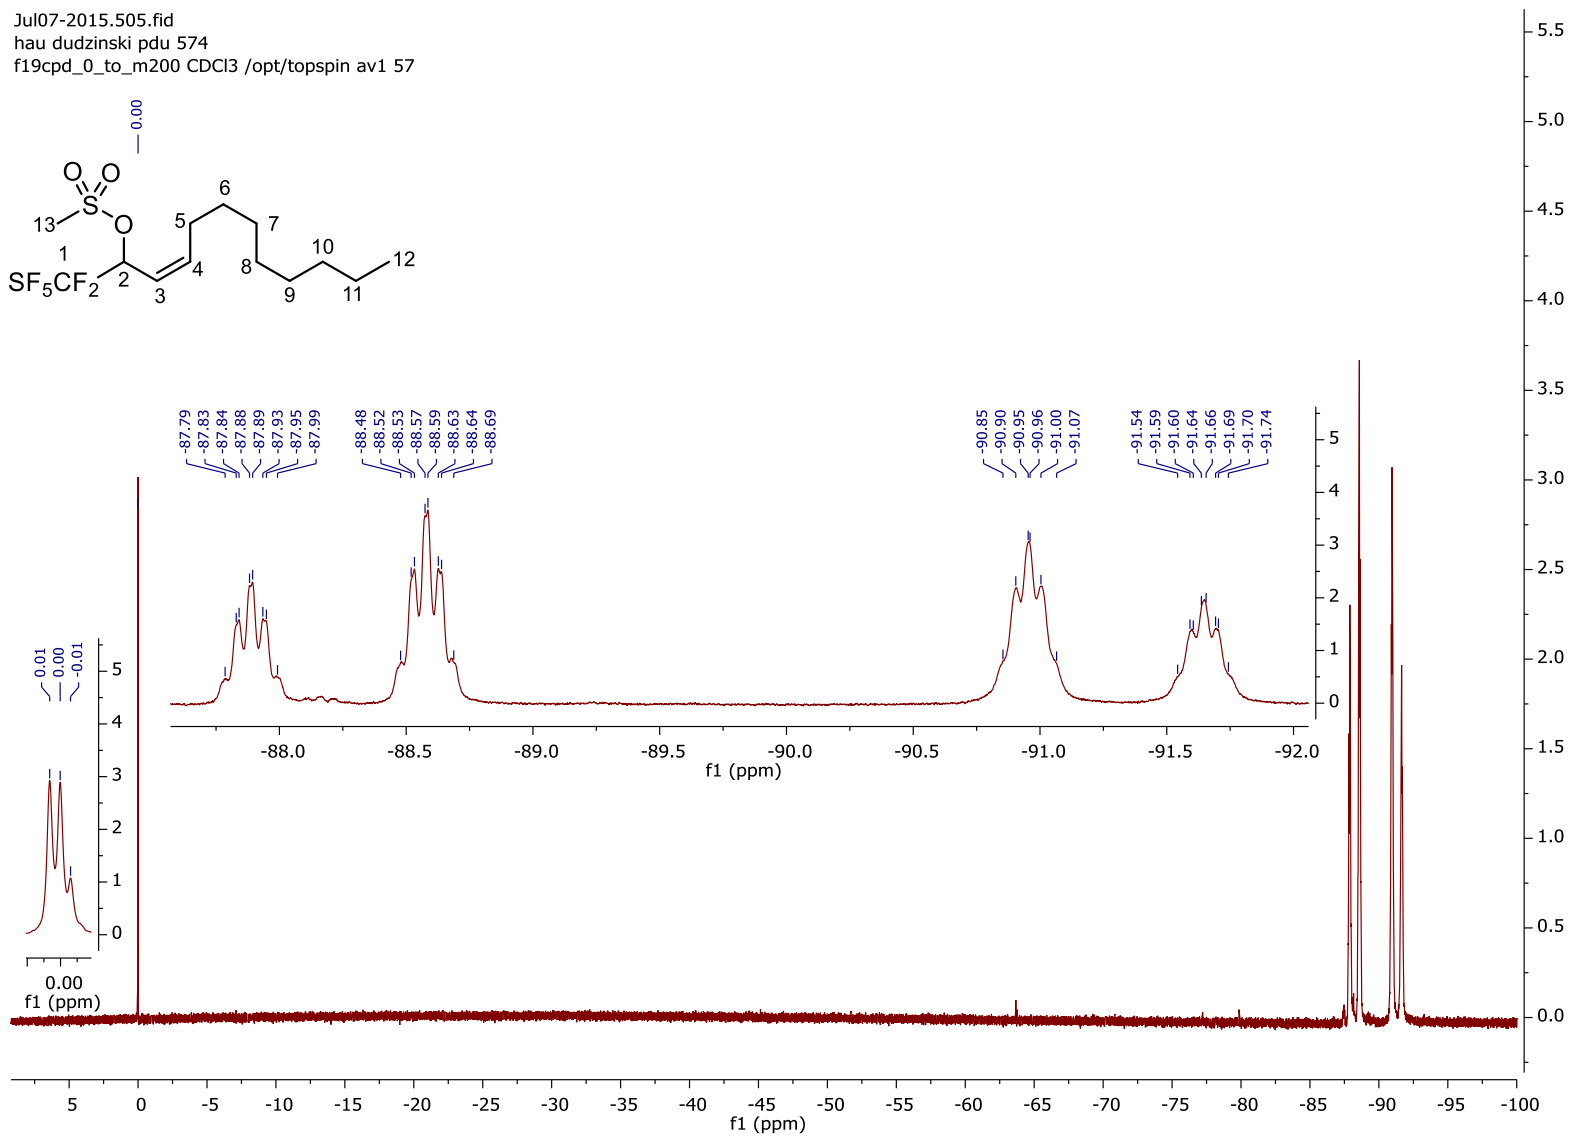

$^1\text{H}$  NMR spectrum of 1-Bromo-5,5,5-trifluoro-4-hydroxypentan-2-one (**24**)

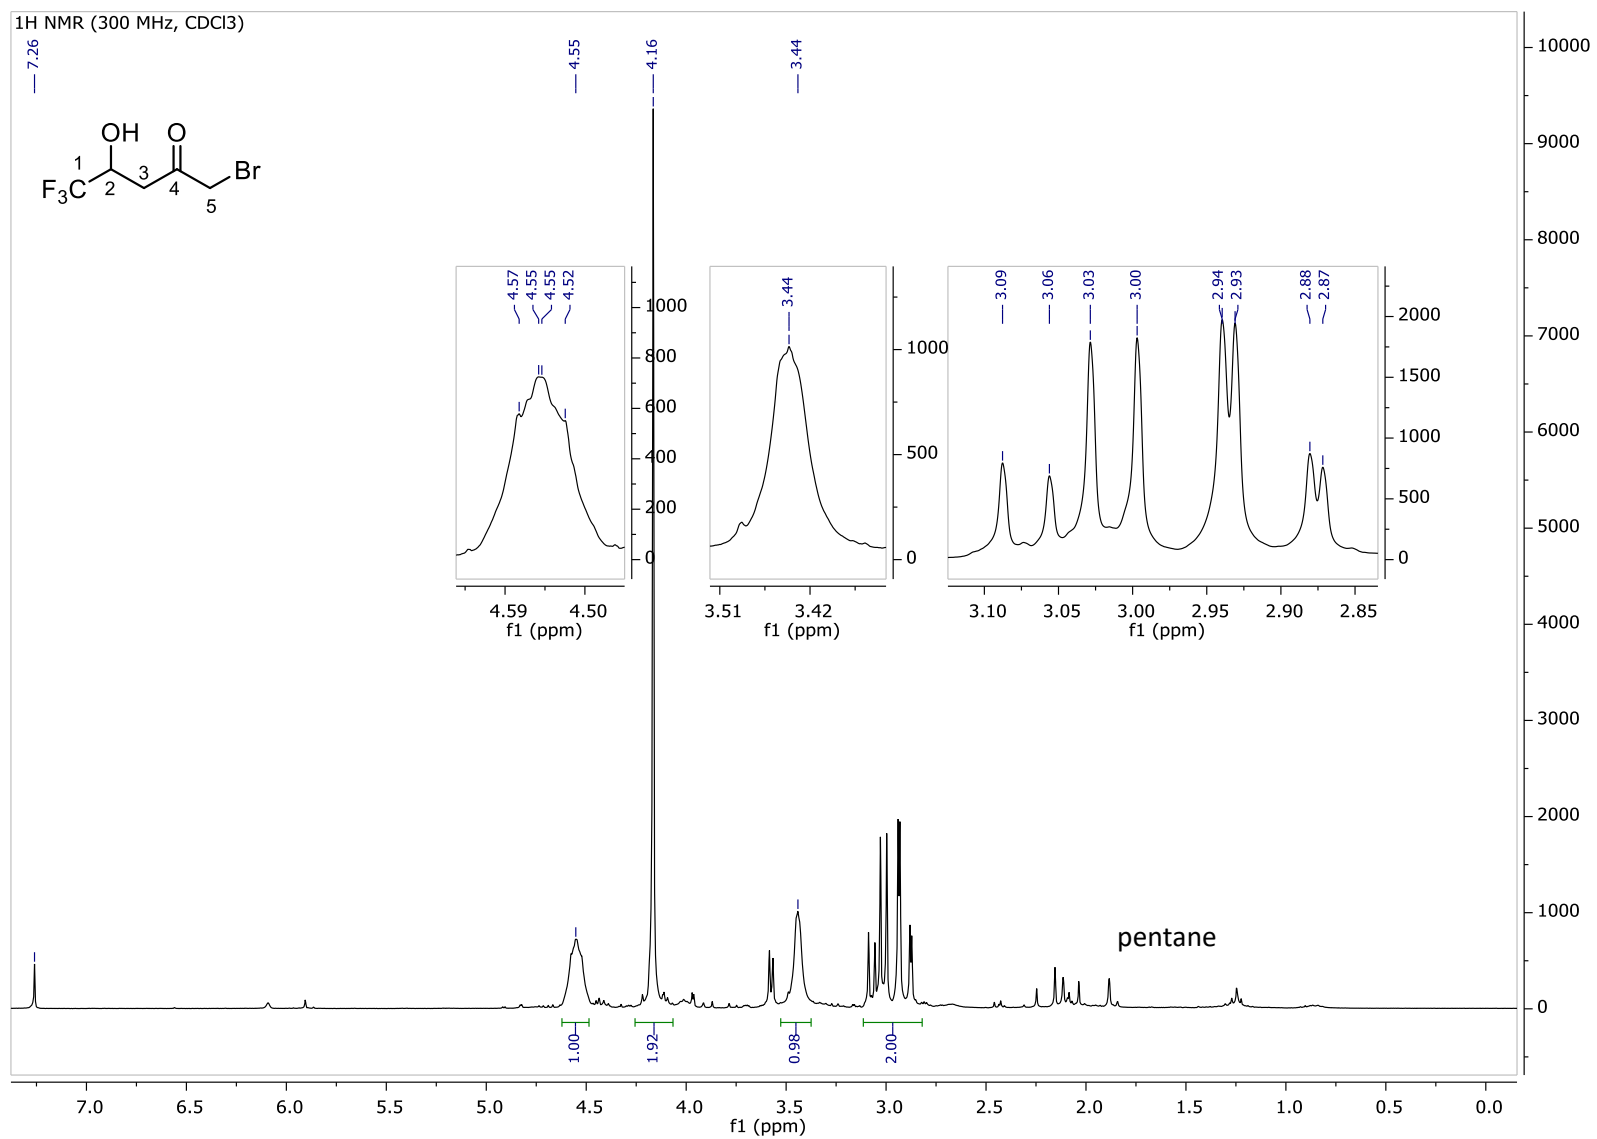

<sup>13</sup>C NMR spectrum of 1-Bromo-5,5,5-trifluoro-4-hydroxypentan-2-one (**24**)

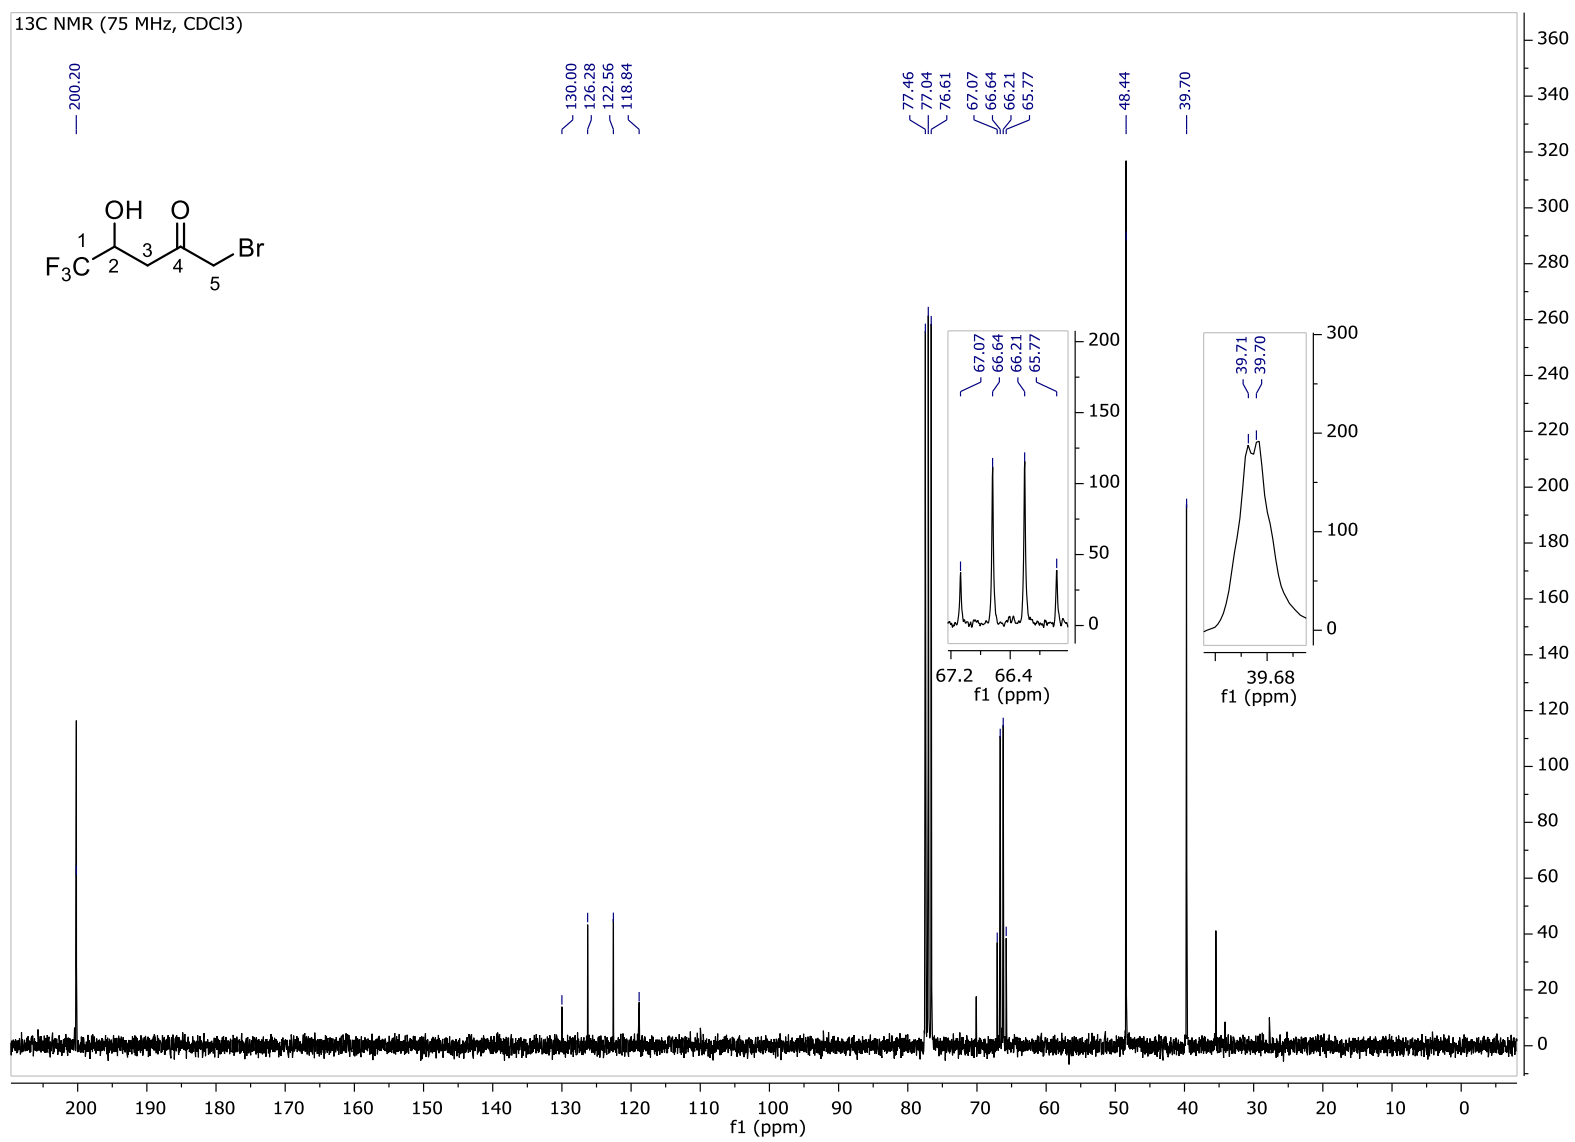

<sup>19</sup>F NMR spectrum of 1-Bromo-5,5,5-trifluoro-4-hydroxypentan-2-one (24)

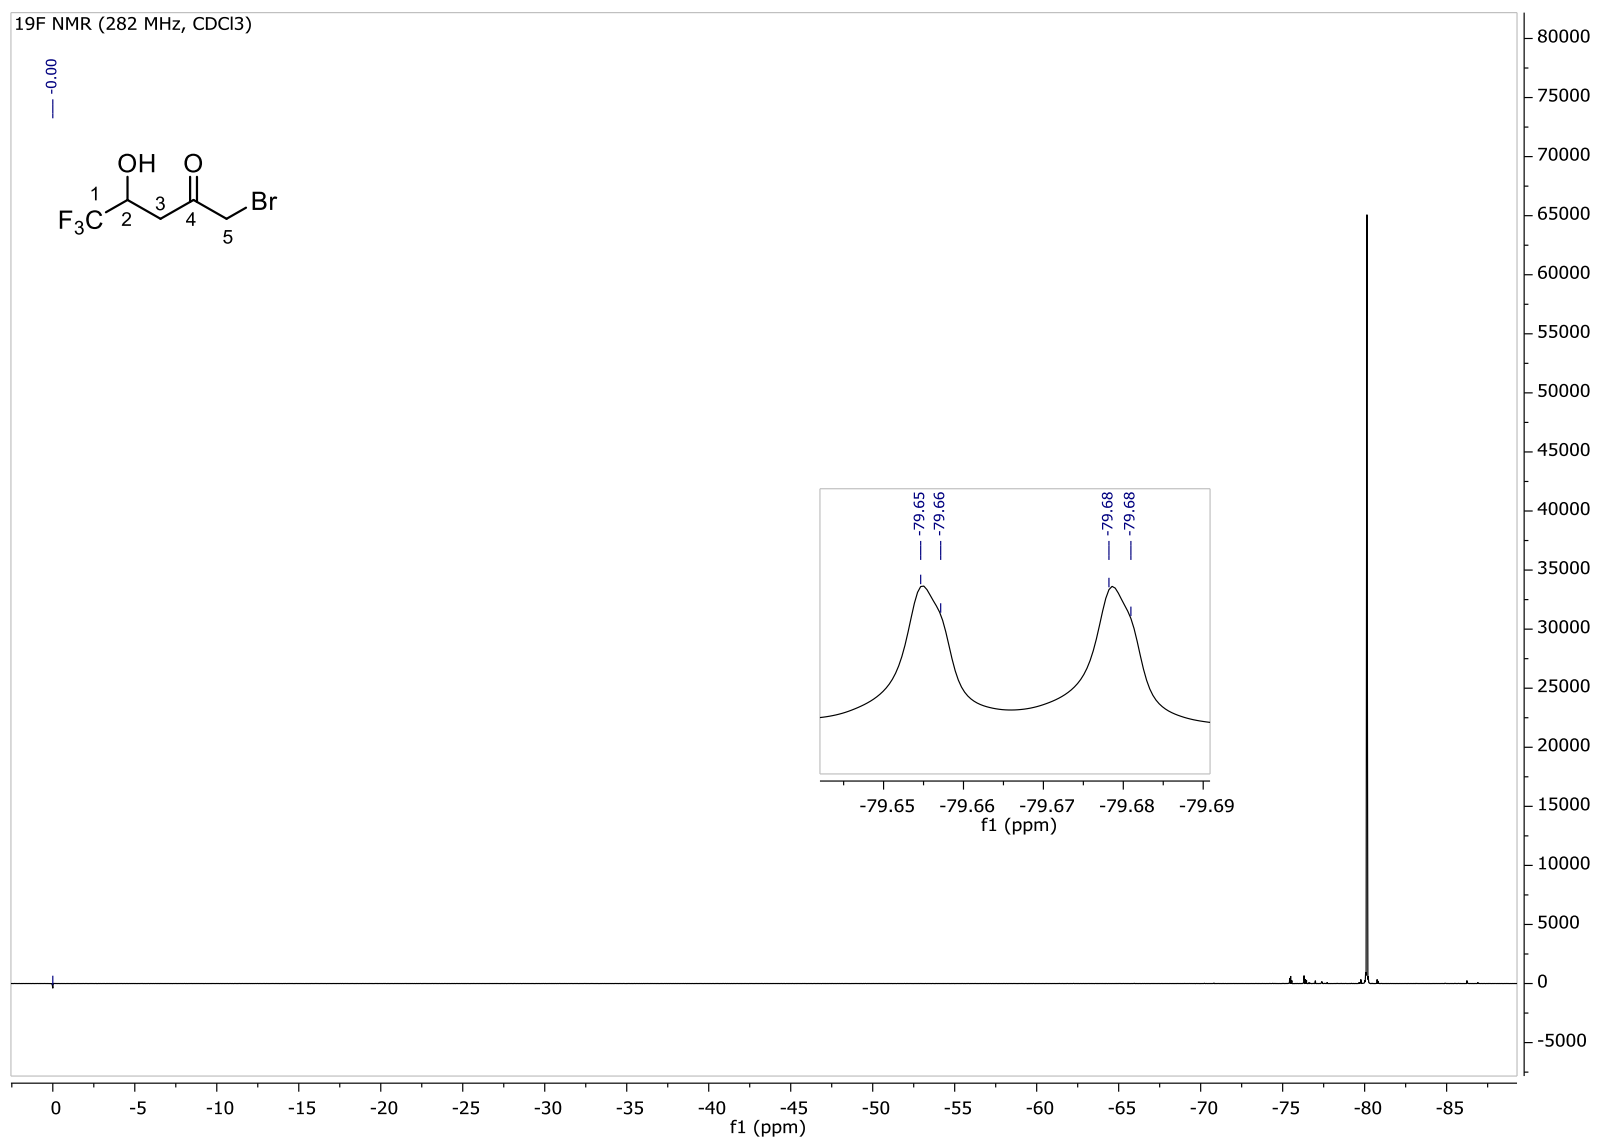



<sup>1</sup>H NMR spectrum of (*E*)-1-Bromo-5,5,5-trifluoropent-3-en-2-ol (**20**)

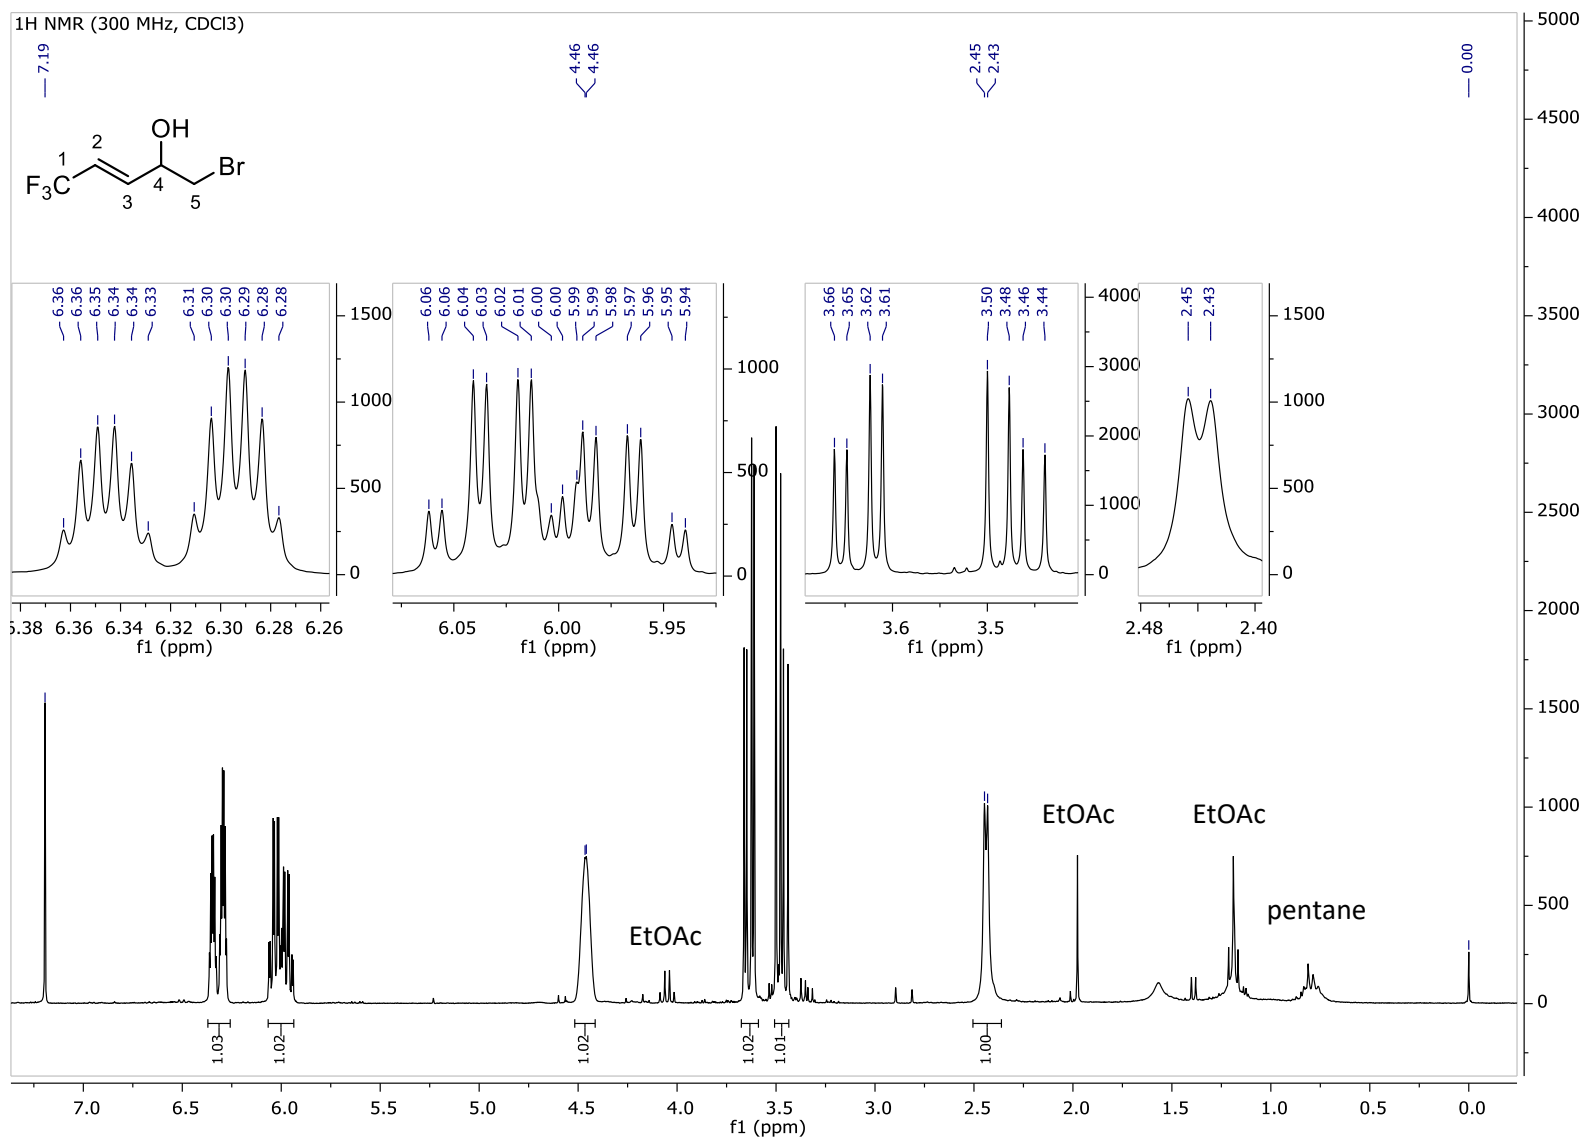

<sup>13</sup>C NMR spectrum of (*E*)-1-Bromo-5,5,5-trifluoropent-3-en-2-ol (**20**)

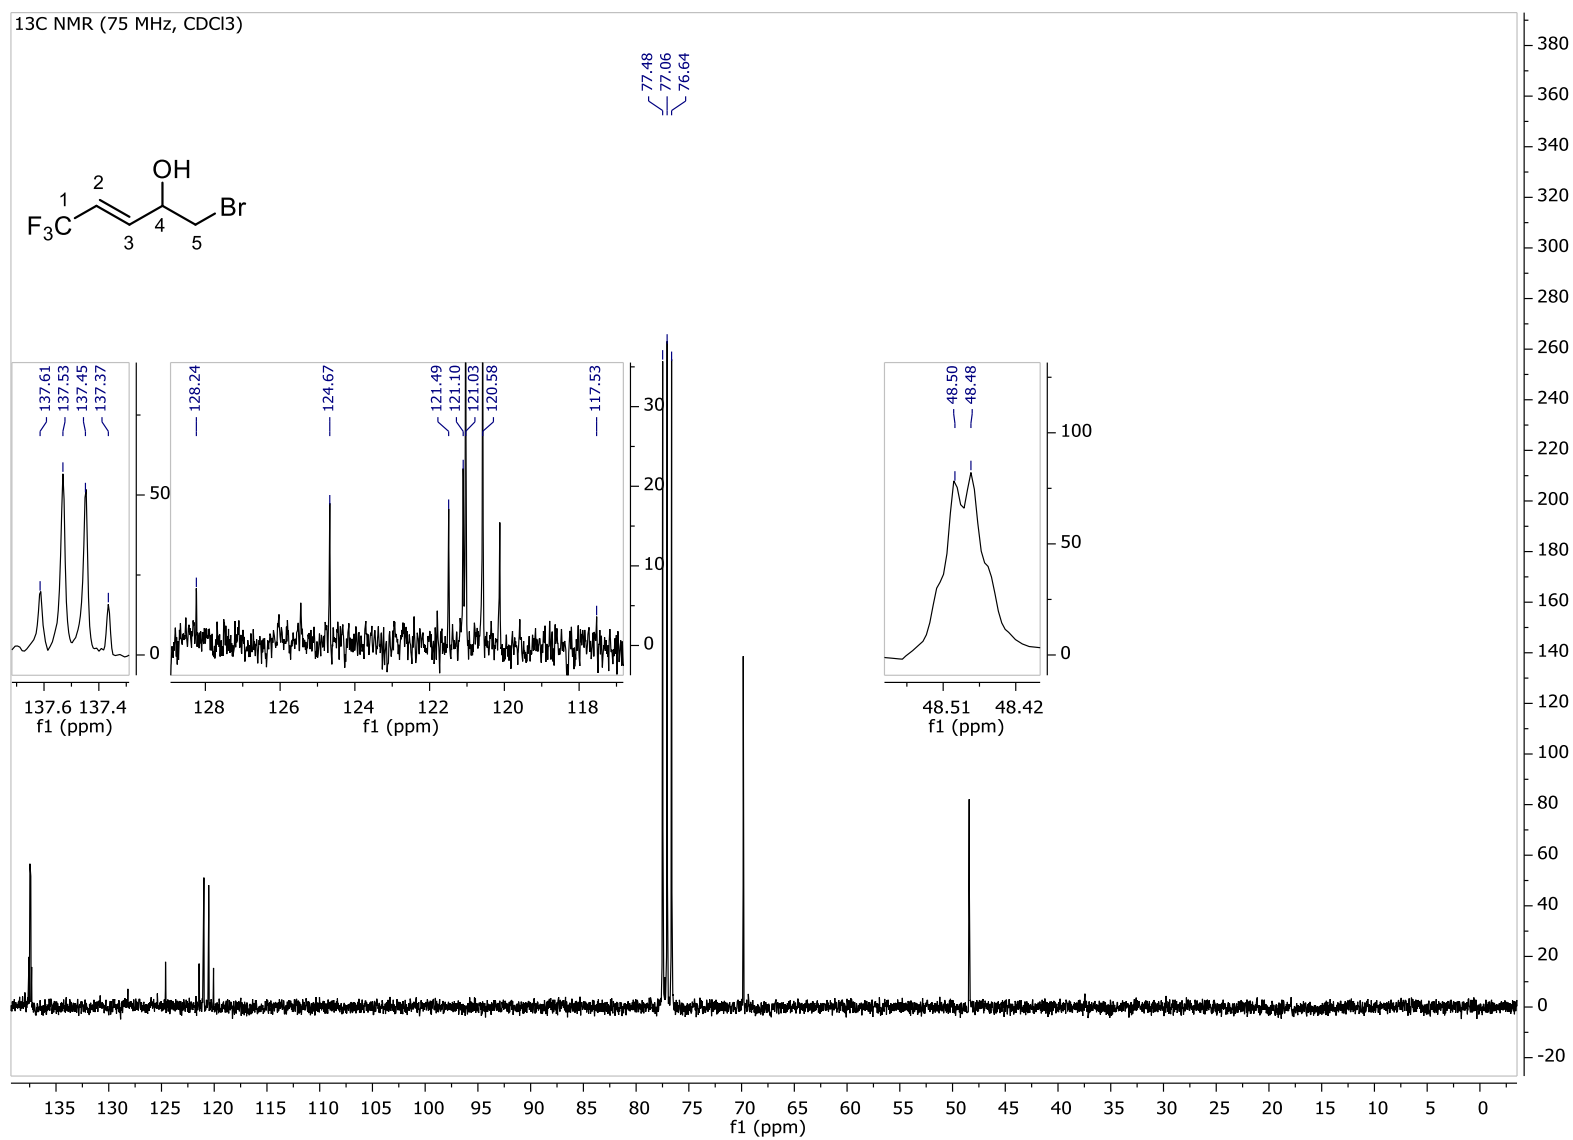

$^{19}\text{F}$  NMR spectrum of (*E*)-1-Bromo-5,5,5-trifluoropent-3-en-2-ol (**20**)

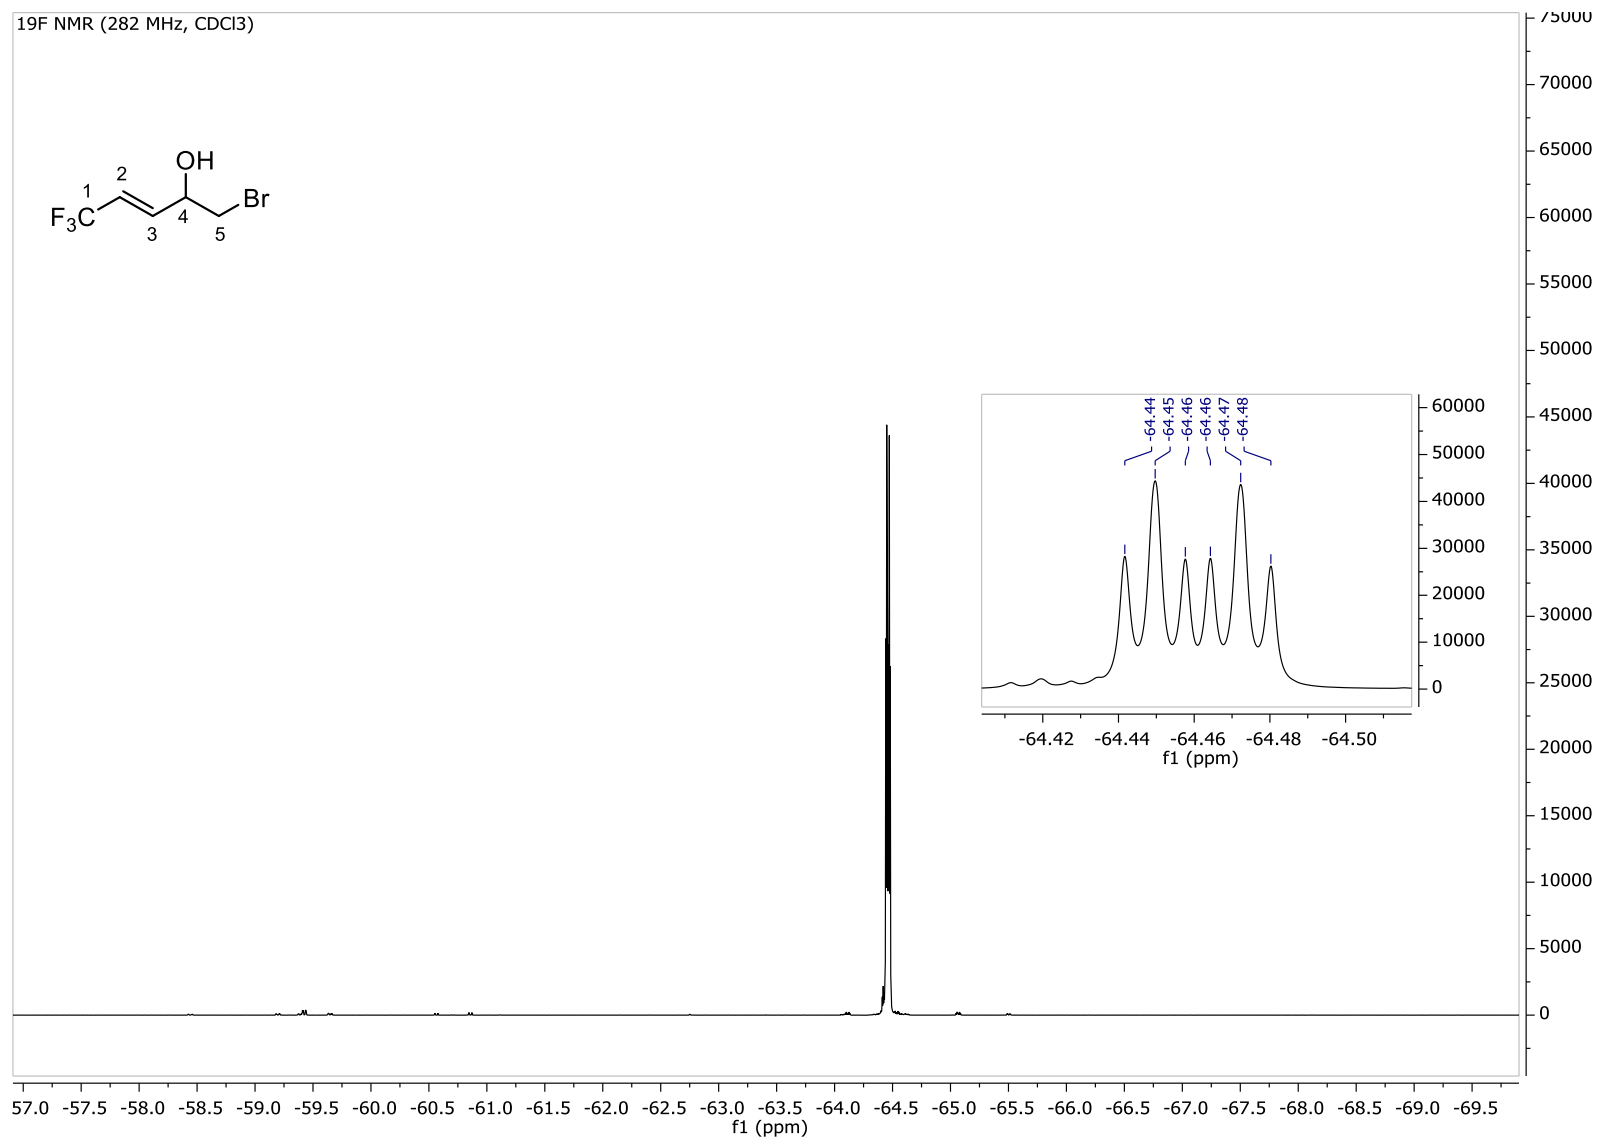

# <sup>1</sup>H NMR spectrum of compound 21

pdu808\_010617\_299k\_1h\_1  
pdu808\_010617\_299k\_1h\_1  
dir: /mdata/haufe/pdu808

500 MHz, probe: AutoX\_DB, temp: 299 K

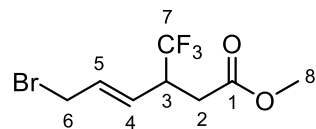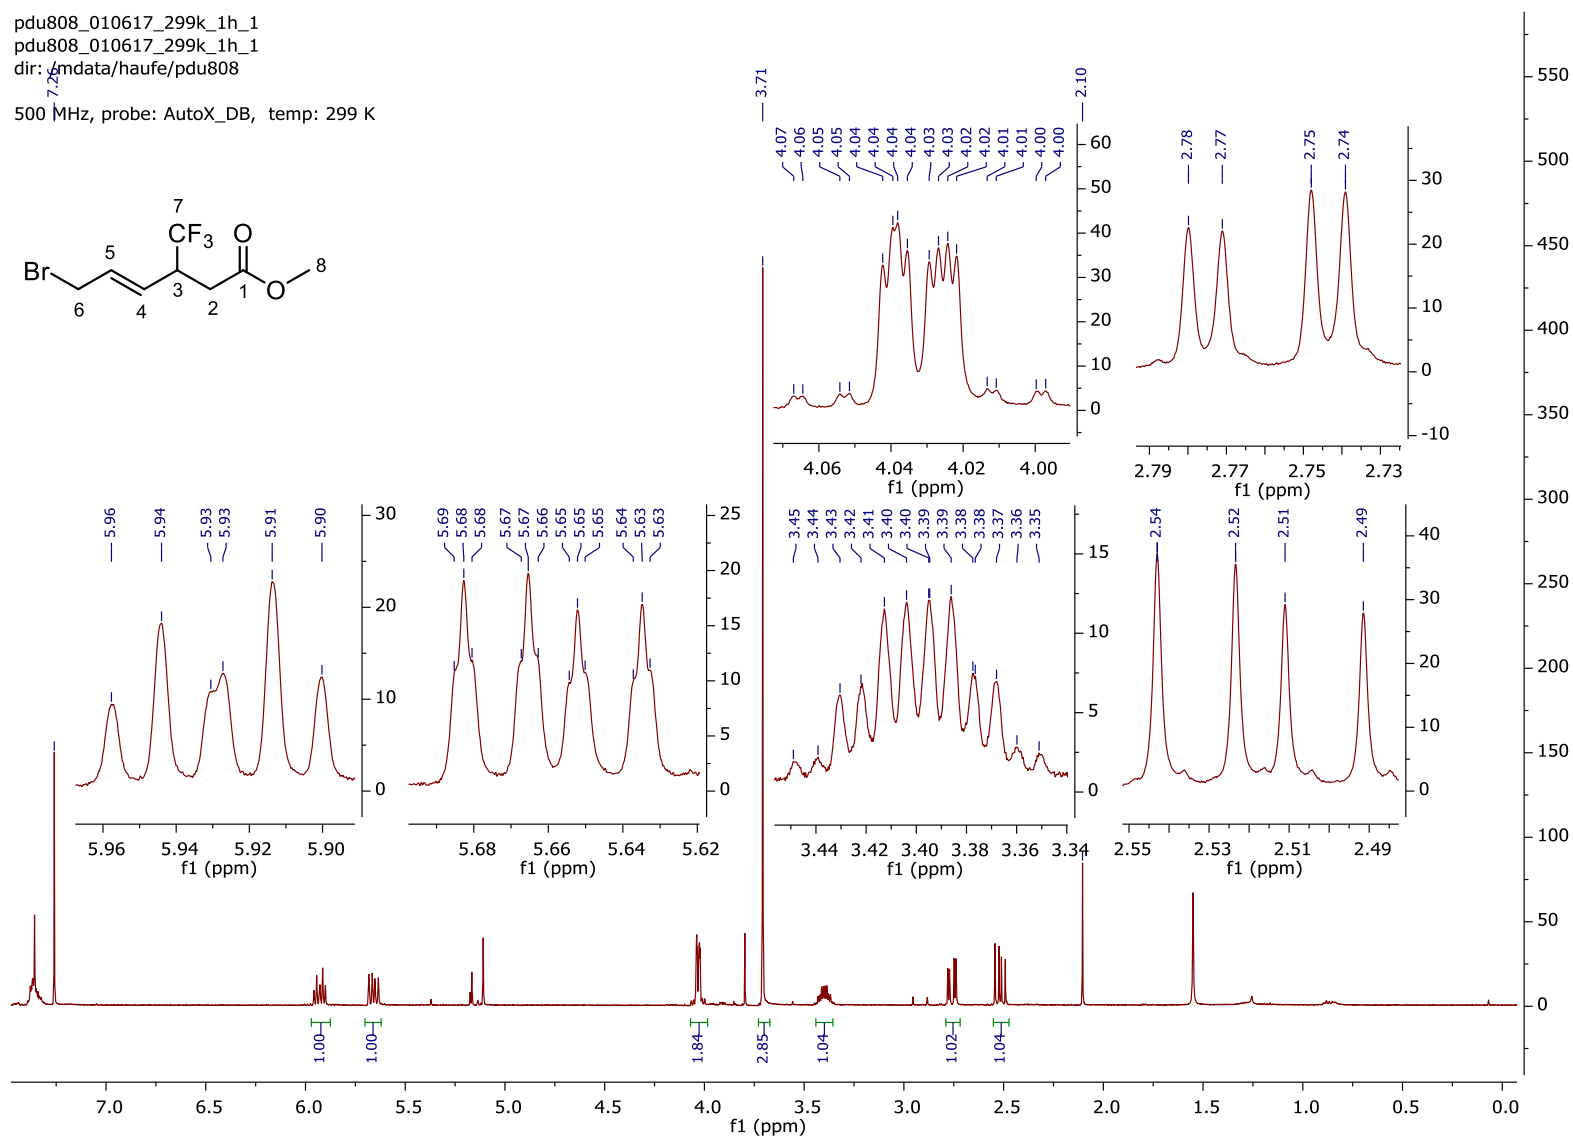

# <sup>13</sup>C NMR spectrum of compound **21**

pdu808\_010617\_299k\_13c\_1  
pdu808\_010617\_299k\_13c\_1  
dir: /mdata/haufe/pdu808

500 MHz, probe: AutoX\_DB, temp: 299 K

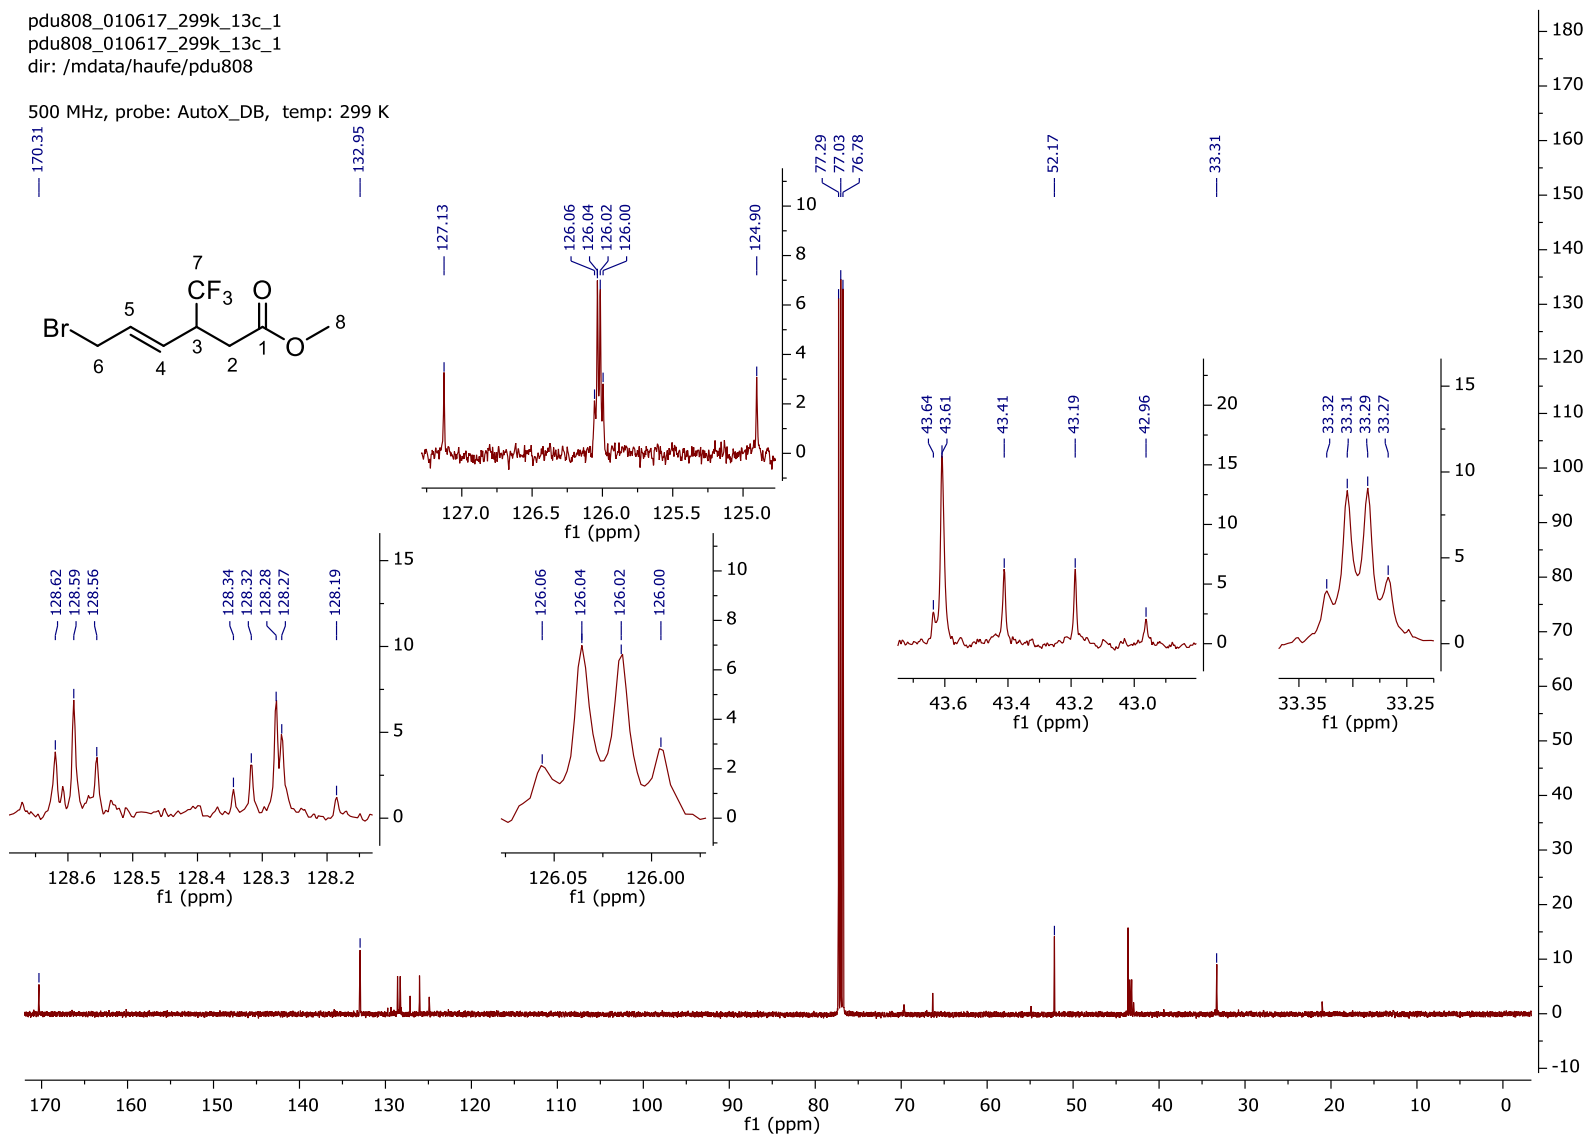

# <sup>19</sup>F NMR spectrum of compound 21

May30-2017.603.fid  
hau dudzinski pdu 808  
f19cpd CDCl3 /opt/topspin av1 13

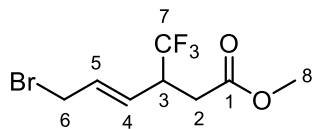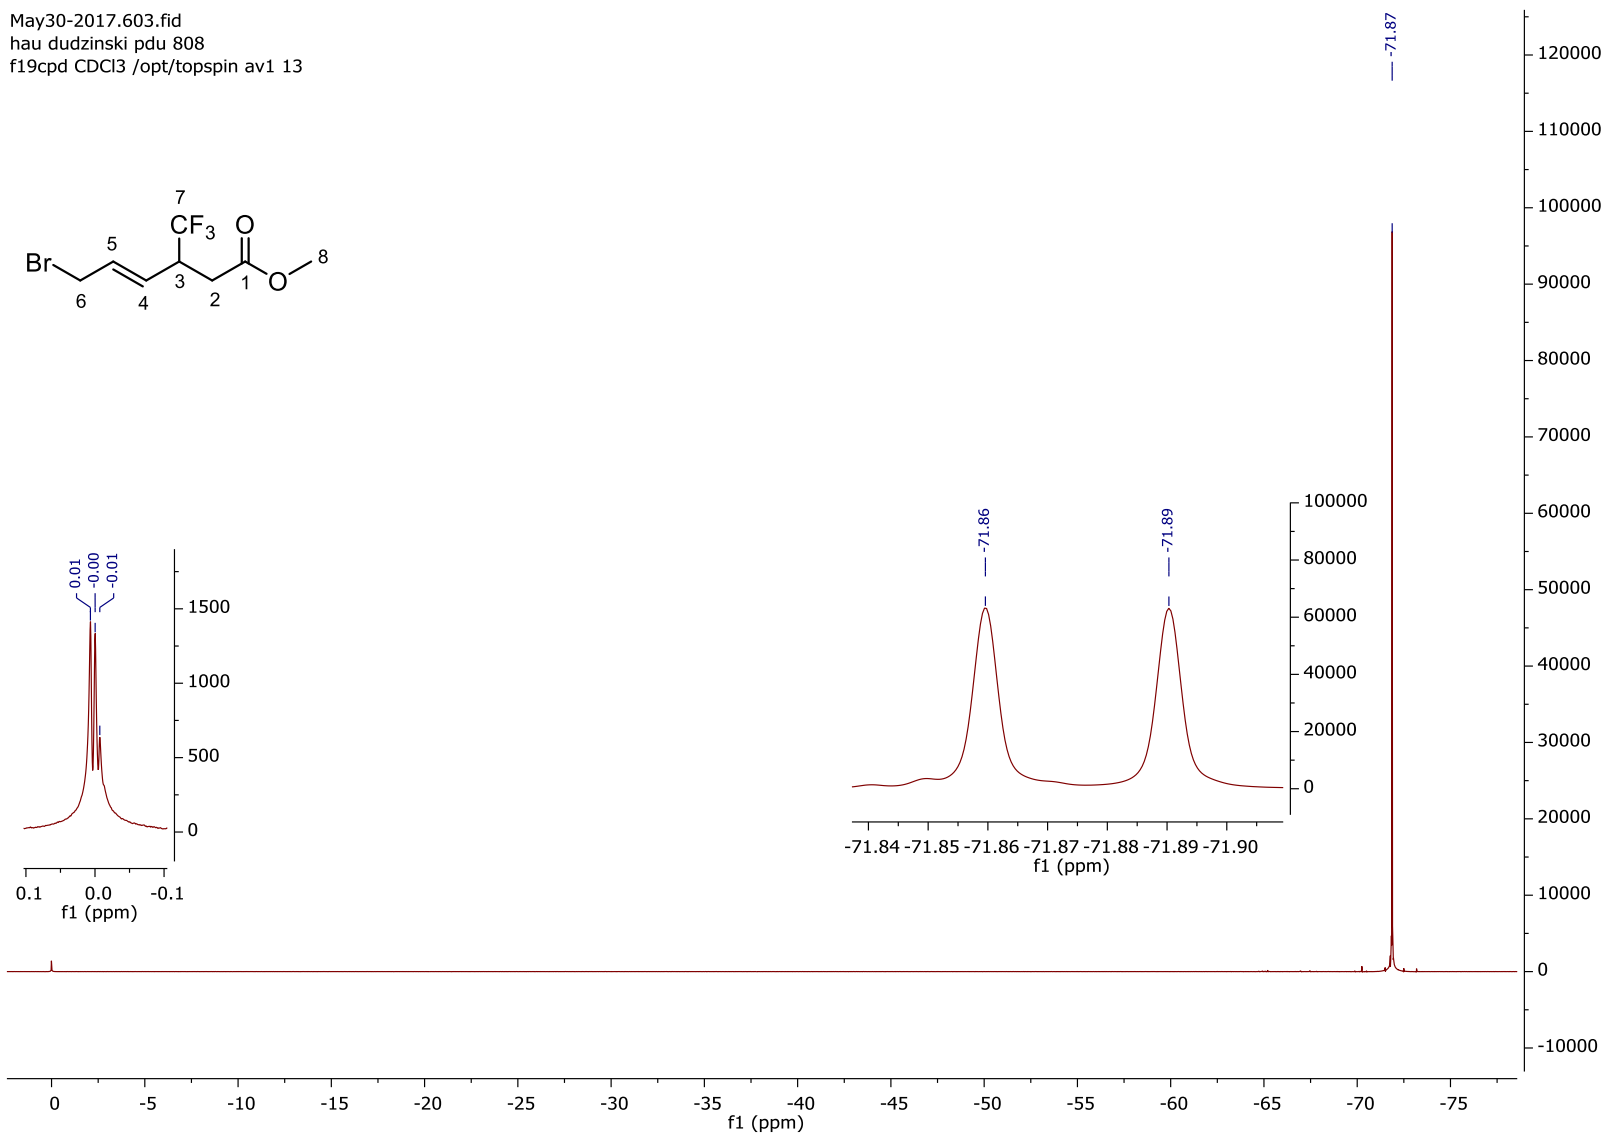

# <sup>1</sup>H NMR spectrum of compound 27

Apr21-2016.780.fid  
hau dudzinski pdu 701  
proton CDCl<sub>3</sub> /opt/topspin av1 28

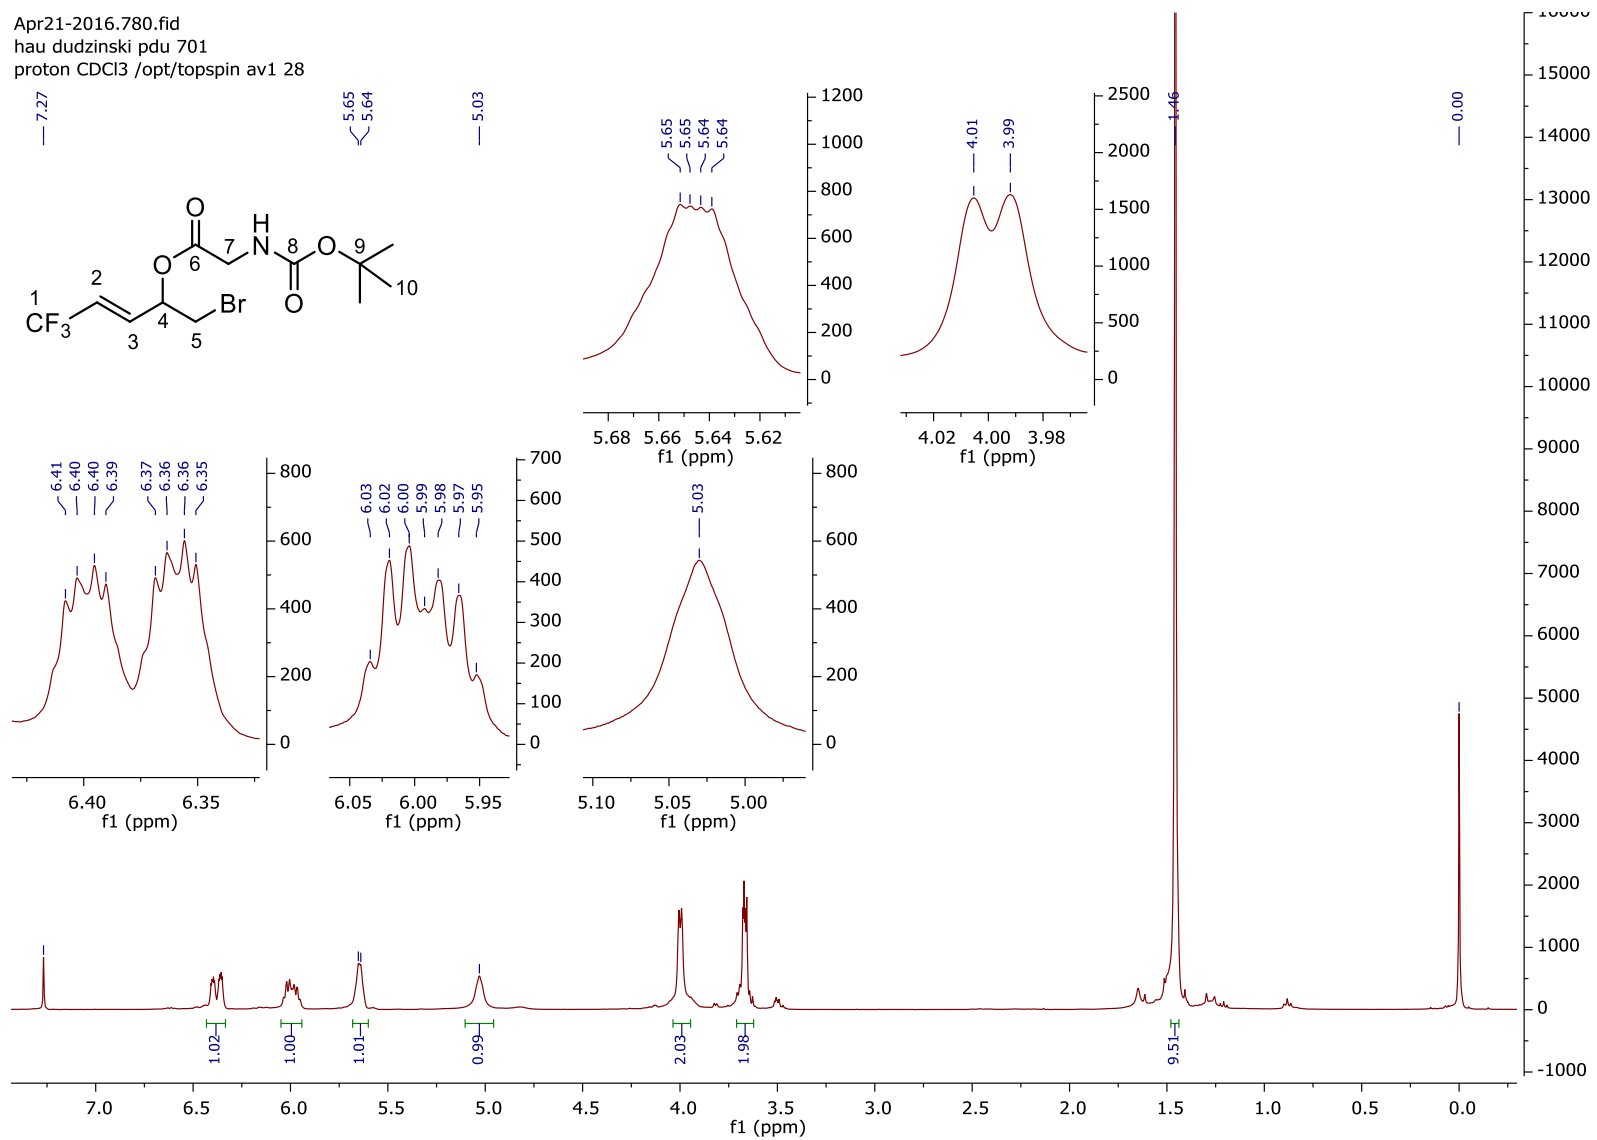

# <sup>13</sup>C NMR spectrum of compound 27

Apr21-2016.782.fid  
hau dudzinski pdu 701  
carbon\_5120 CDCl3 /opt/topspin av1 28

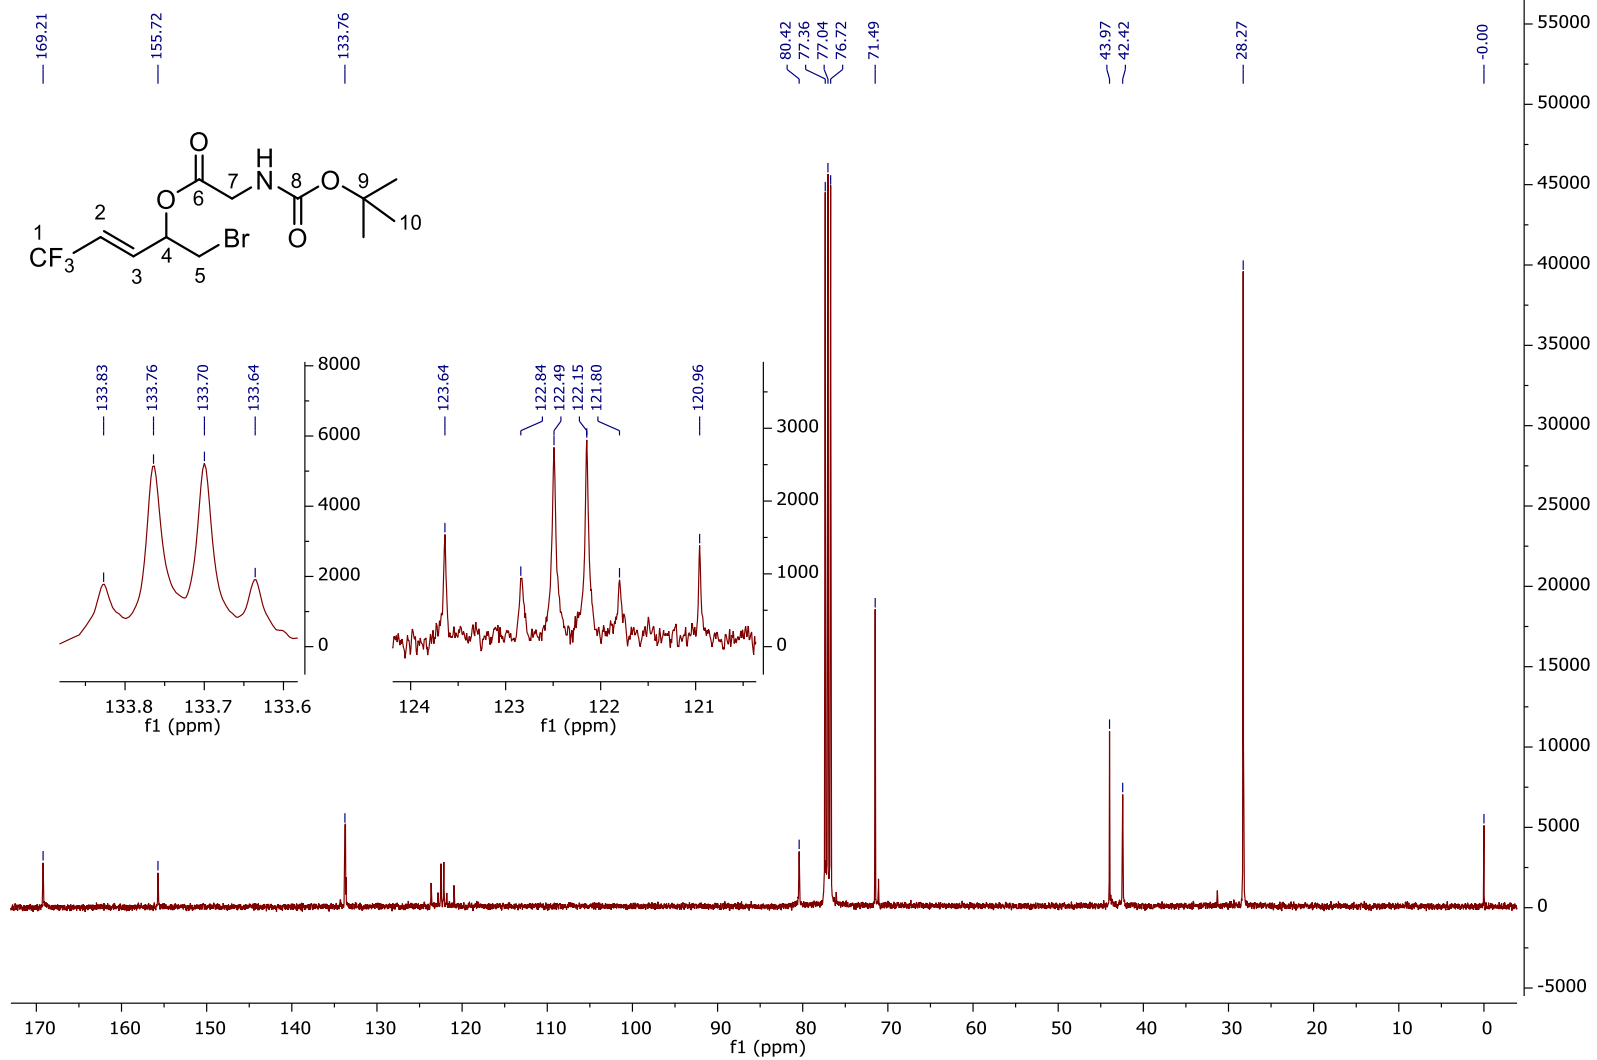



# <sup>19</sup>F NMR spectrum of compound 27

Apr21-2016.14.fid  
hau dudzinski pdu 29  
f19\_0\_to\_m200 CDCl3 /opt/topspin av1 34

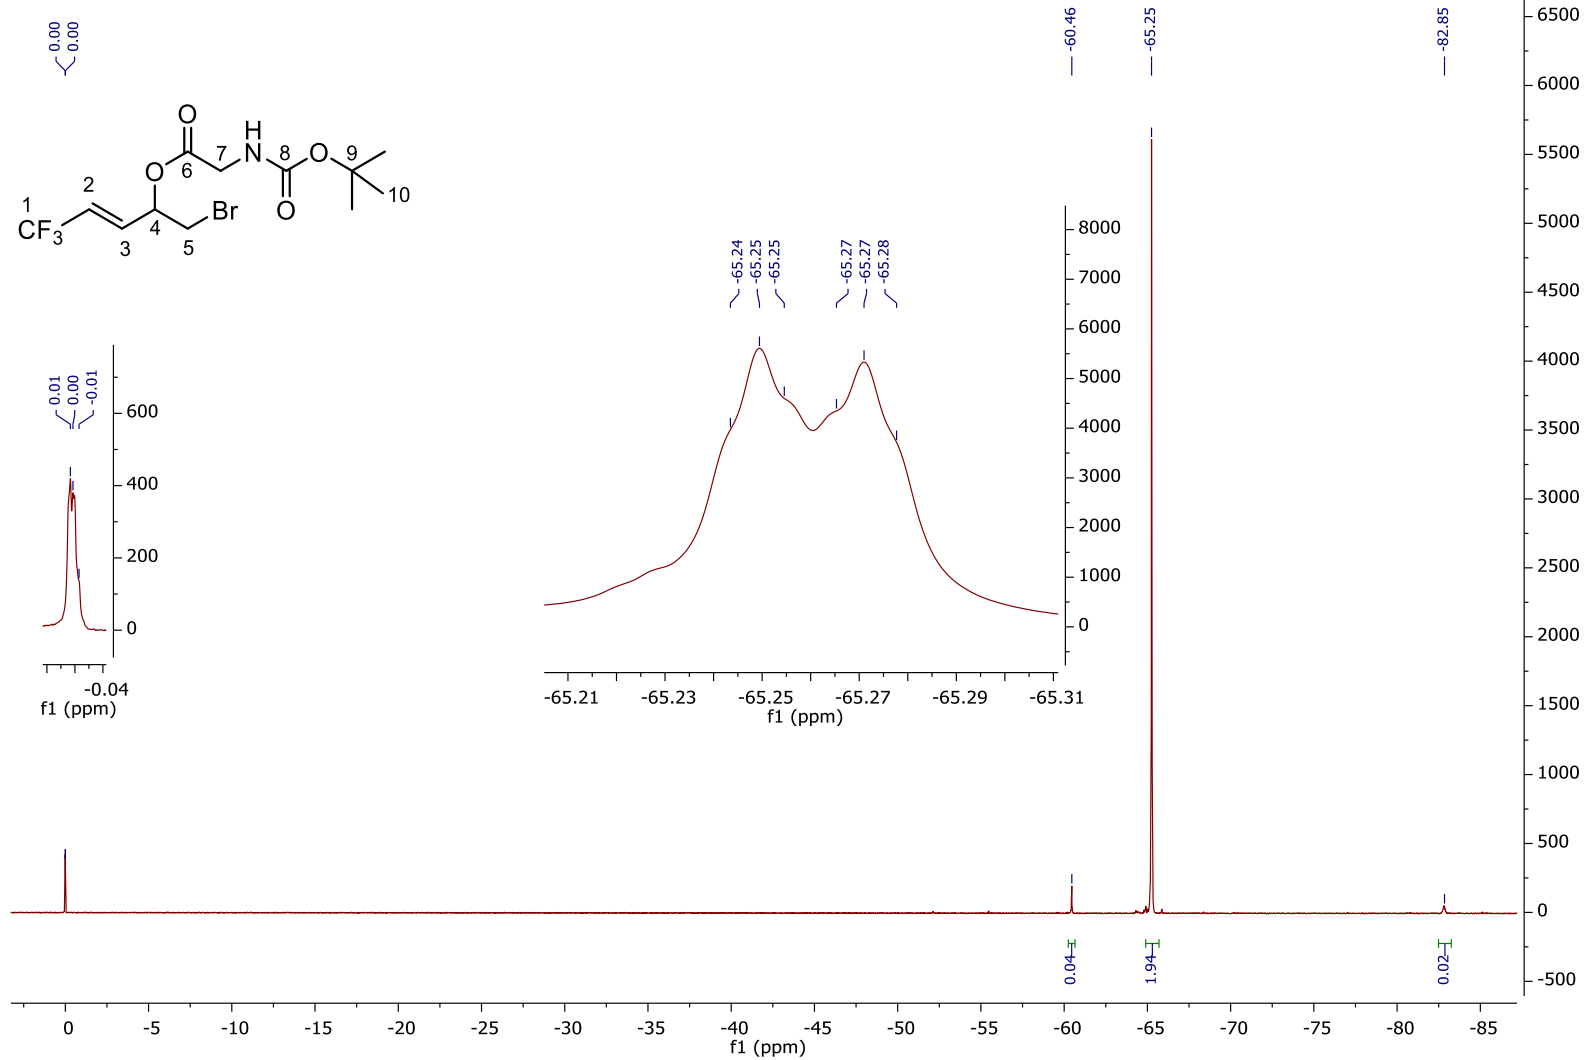

# <sup>1</sup>H NMR spectrum of compound 29a

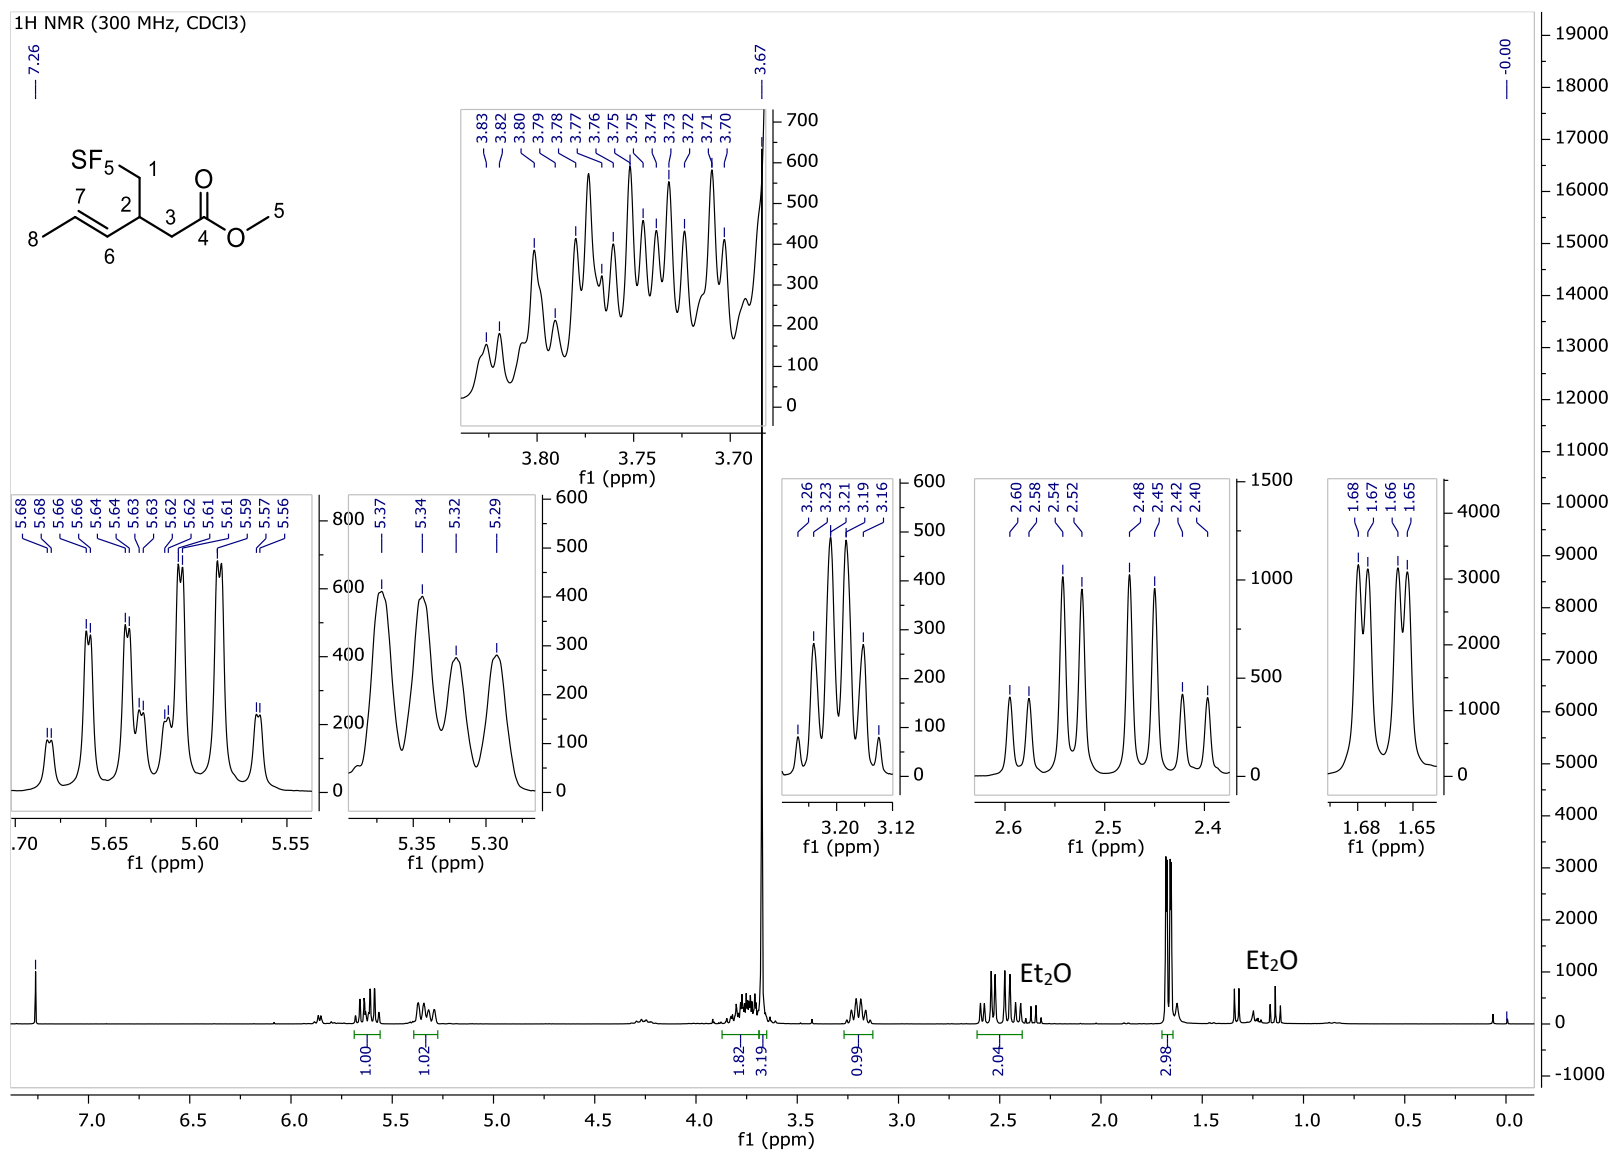

<sup>13</sup>C NMR spectrum of compound **29a**

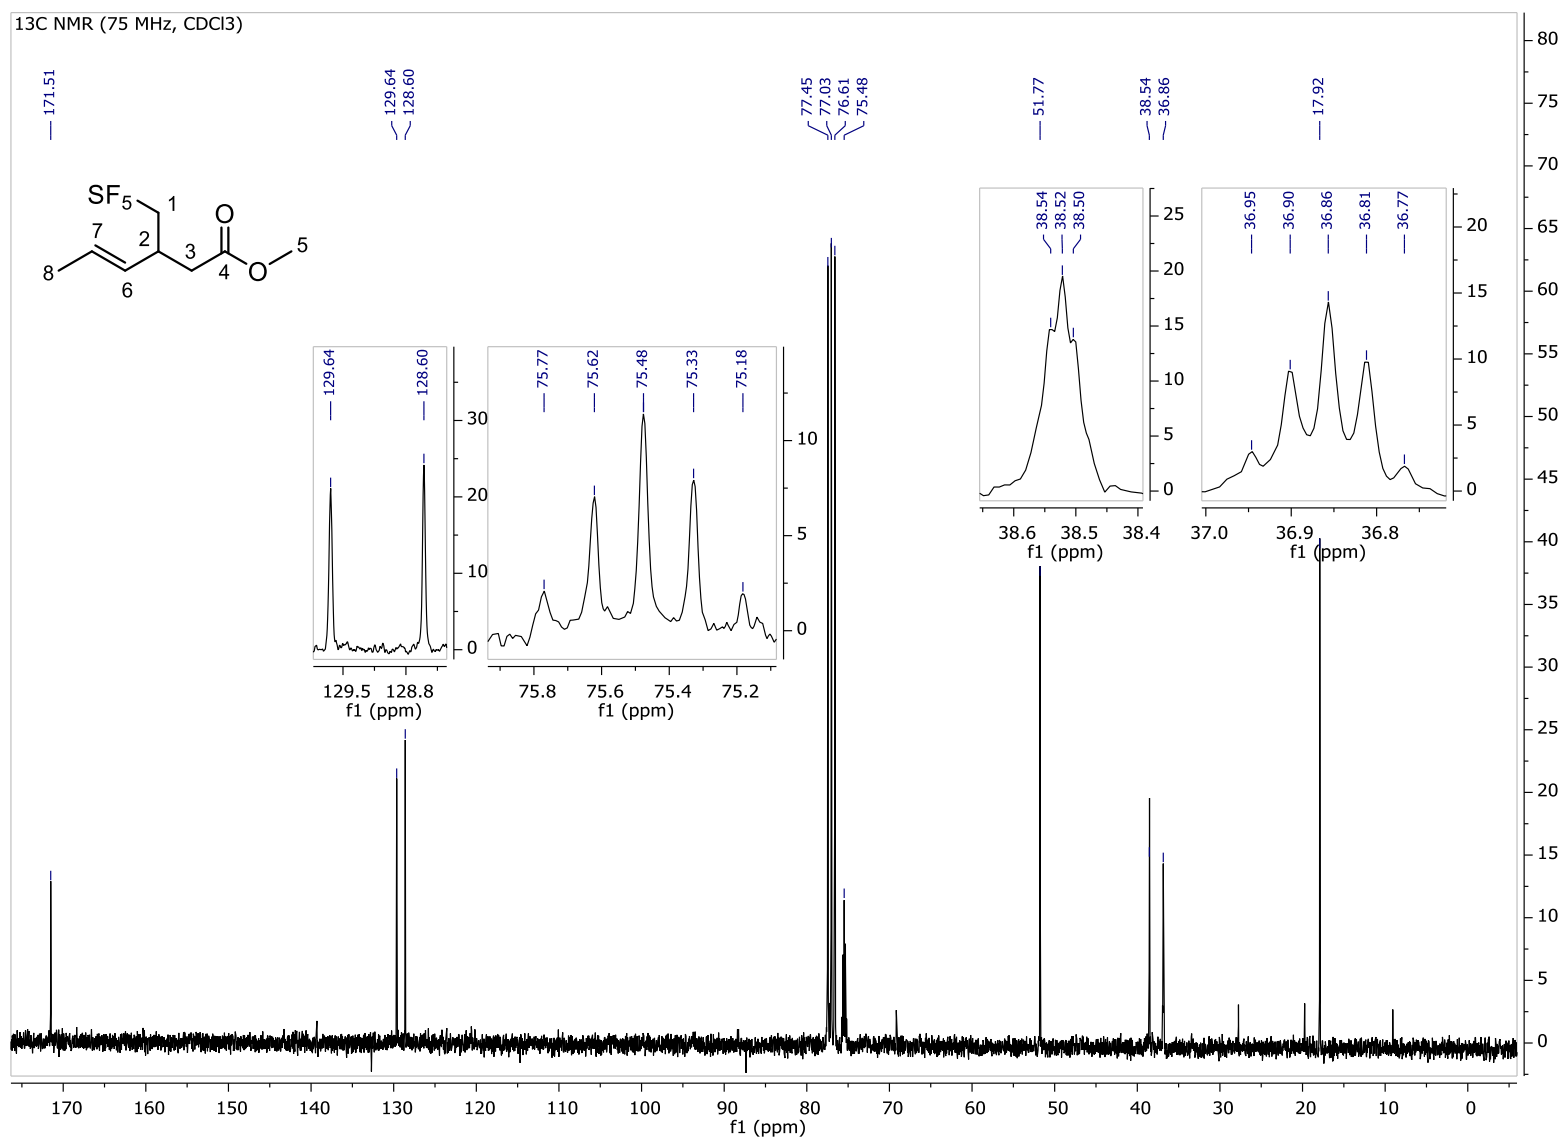

<sup>19</sup>F NMR spectrum of compound **29a**

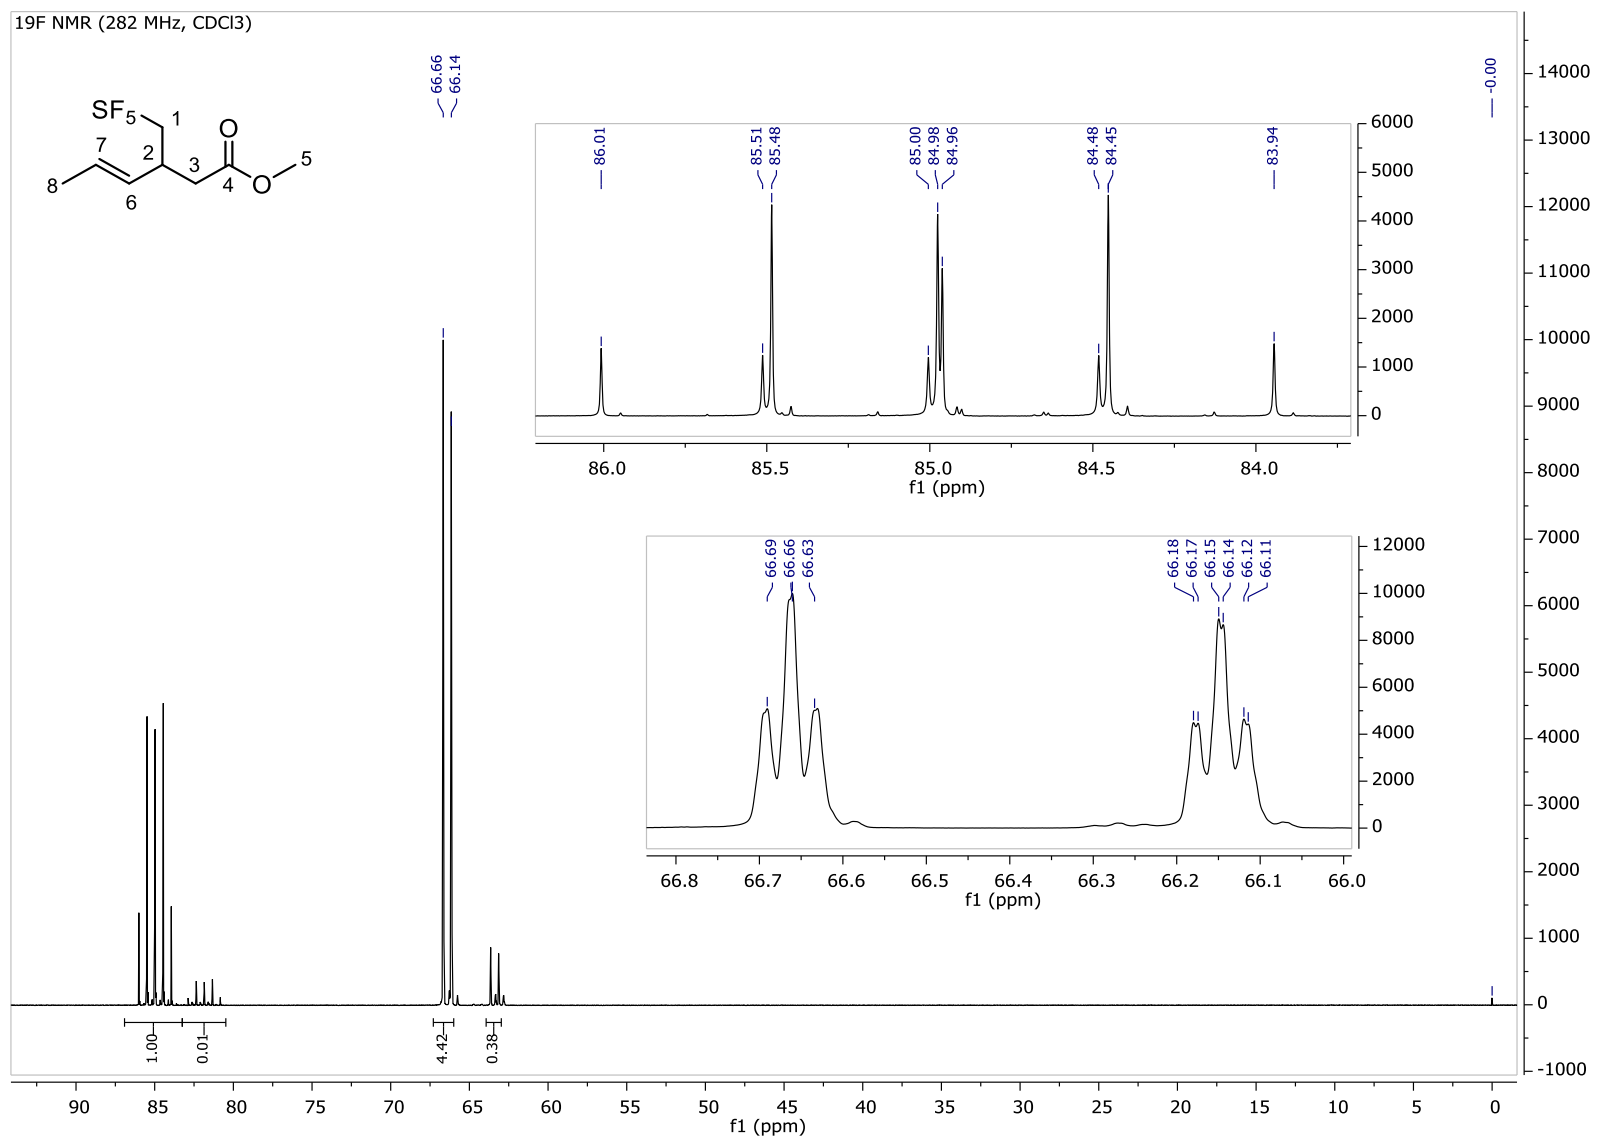

# <sup>1</sup>H NMR spectrum of compound 29b

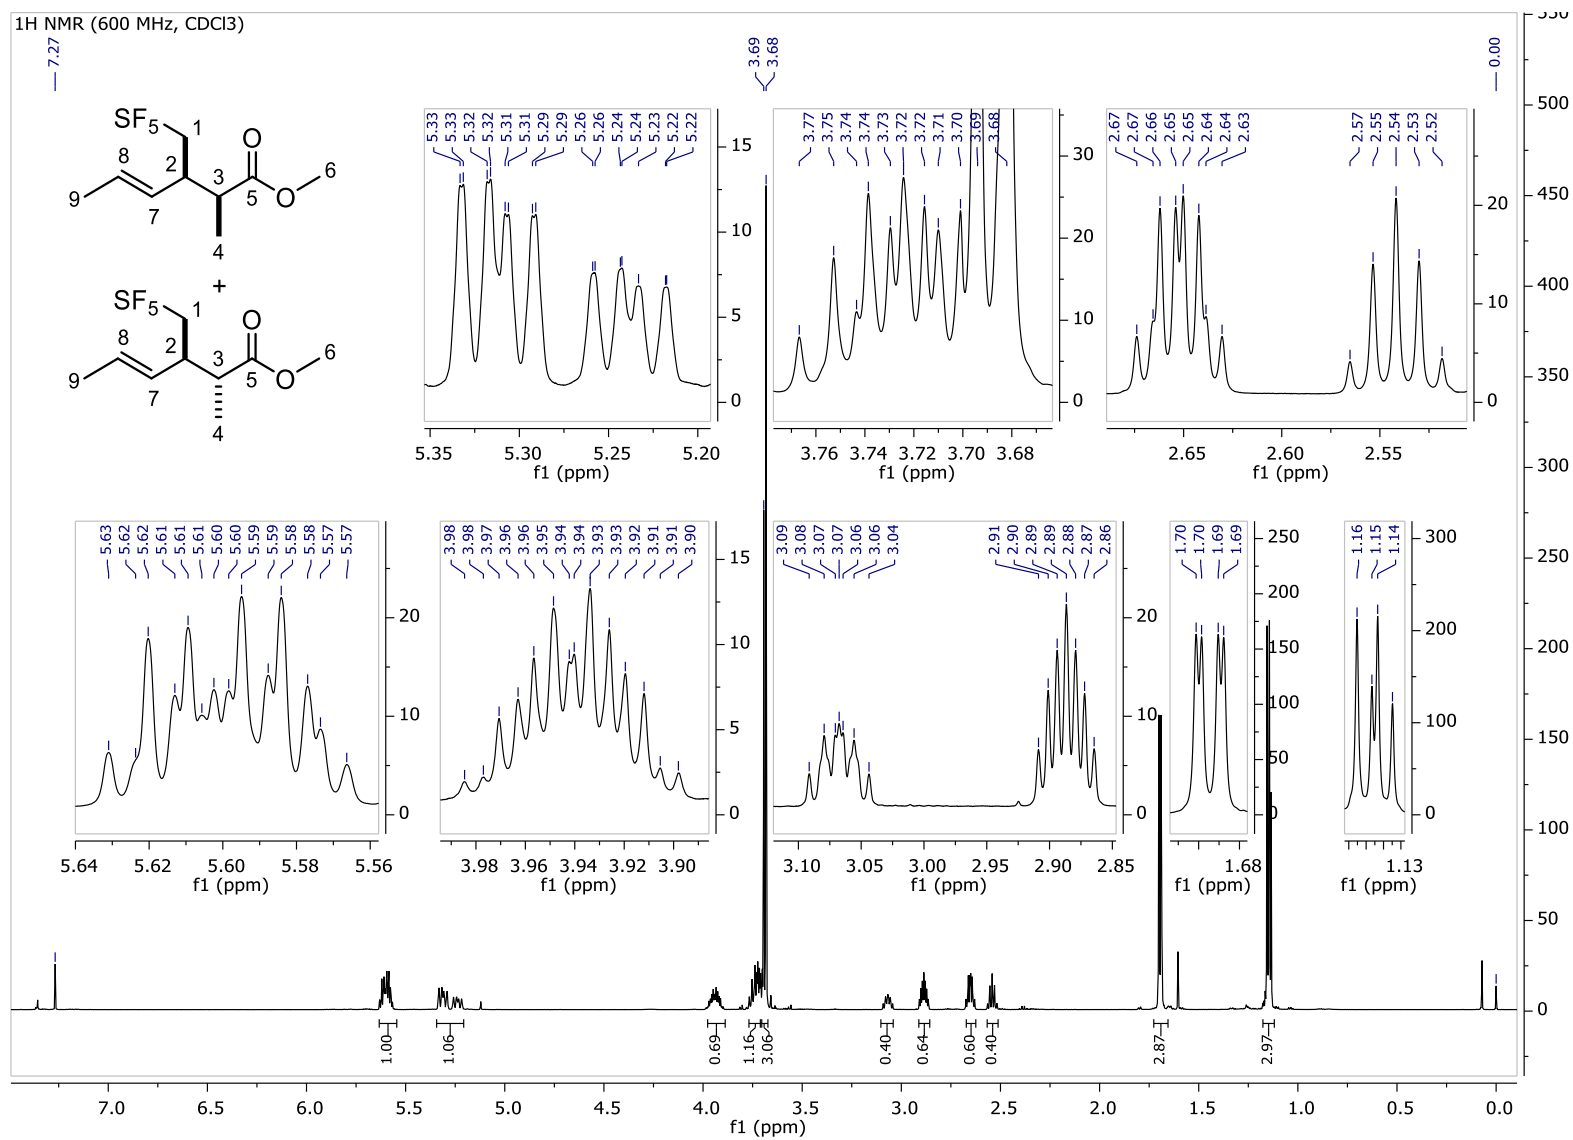

<sup>13</sup>C NMR spectrum of compound **29b**

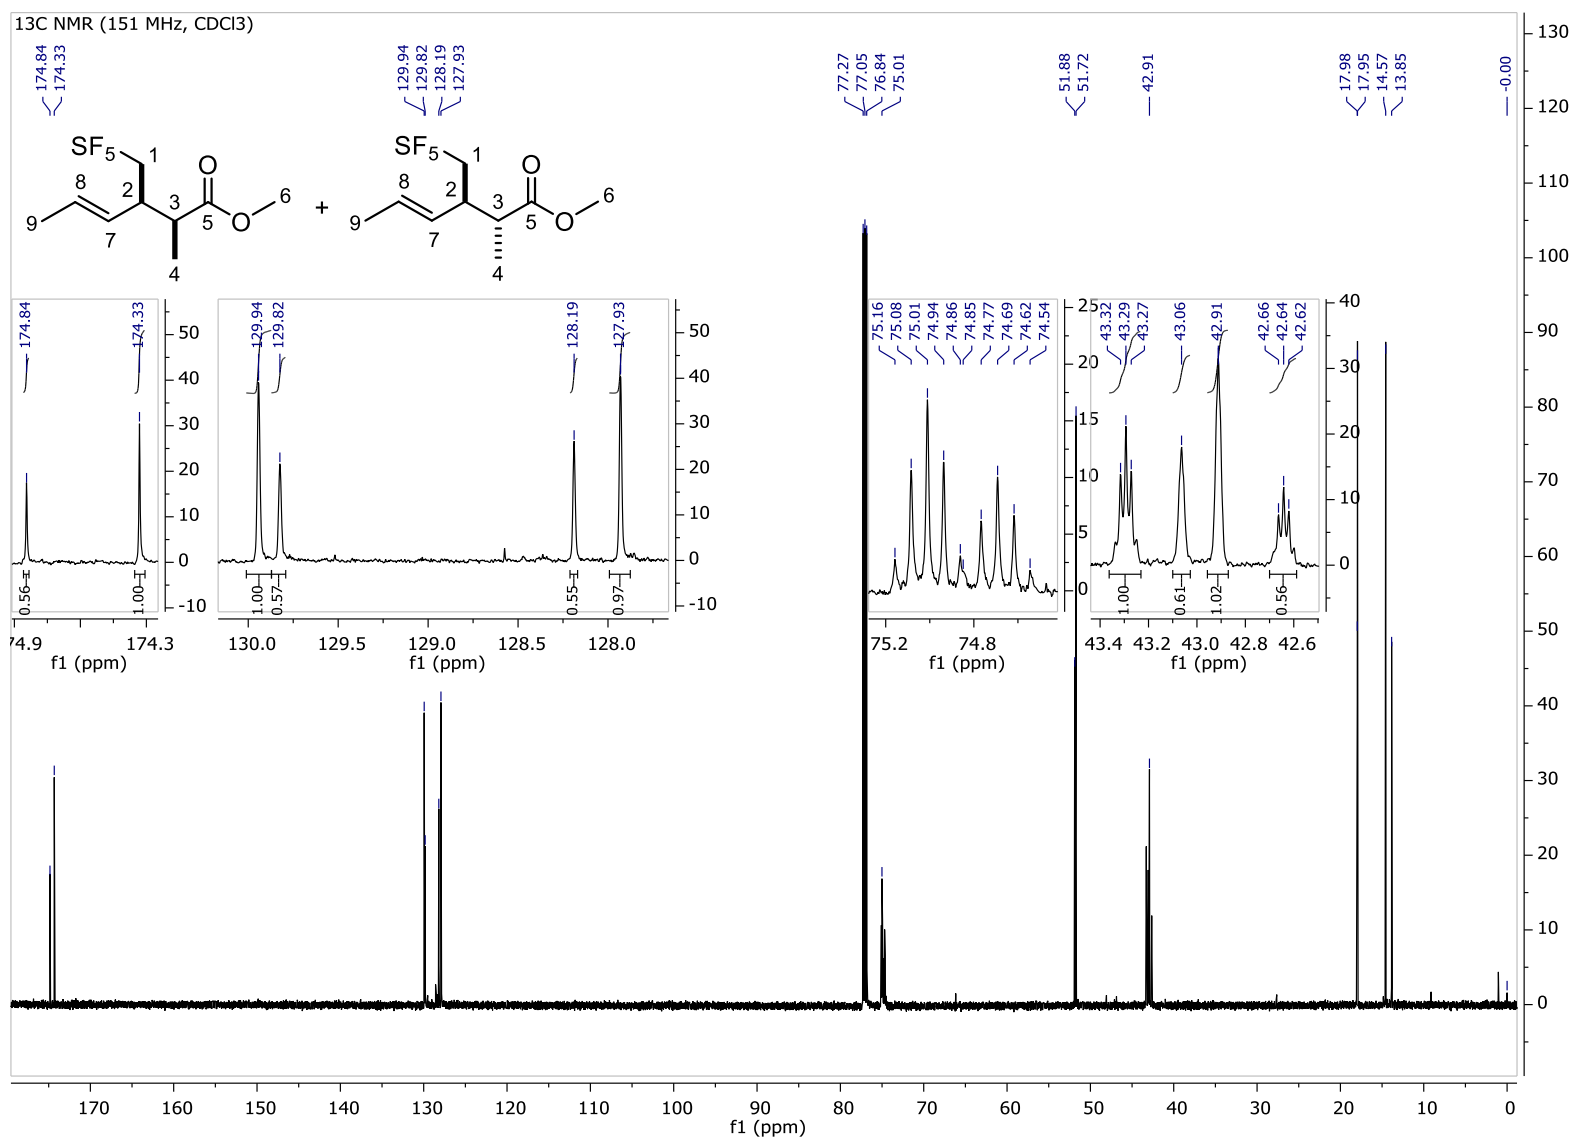

<sup>19</sup>F NMR spectrum of compound **29b**

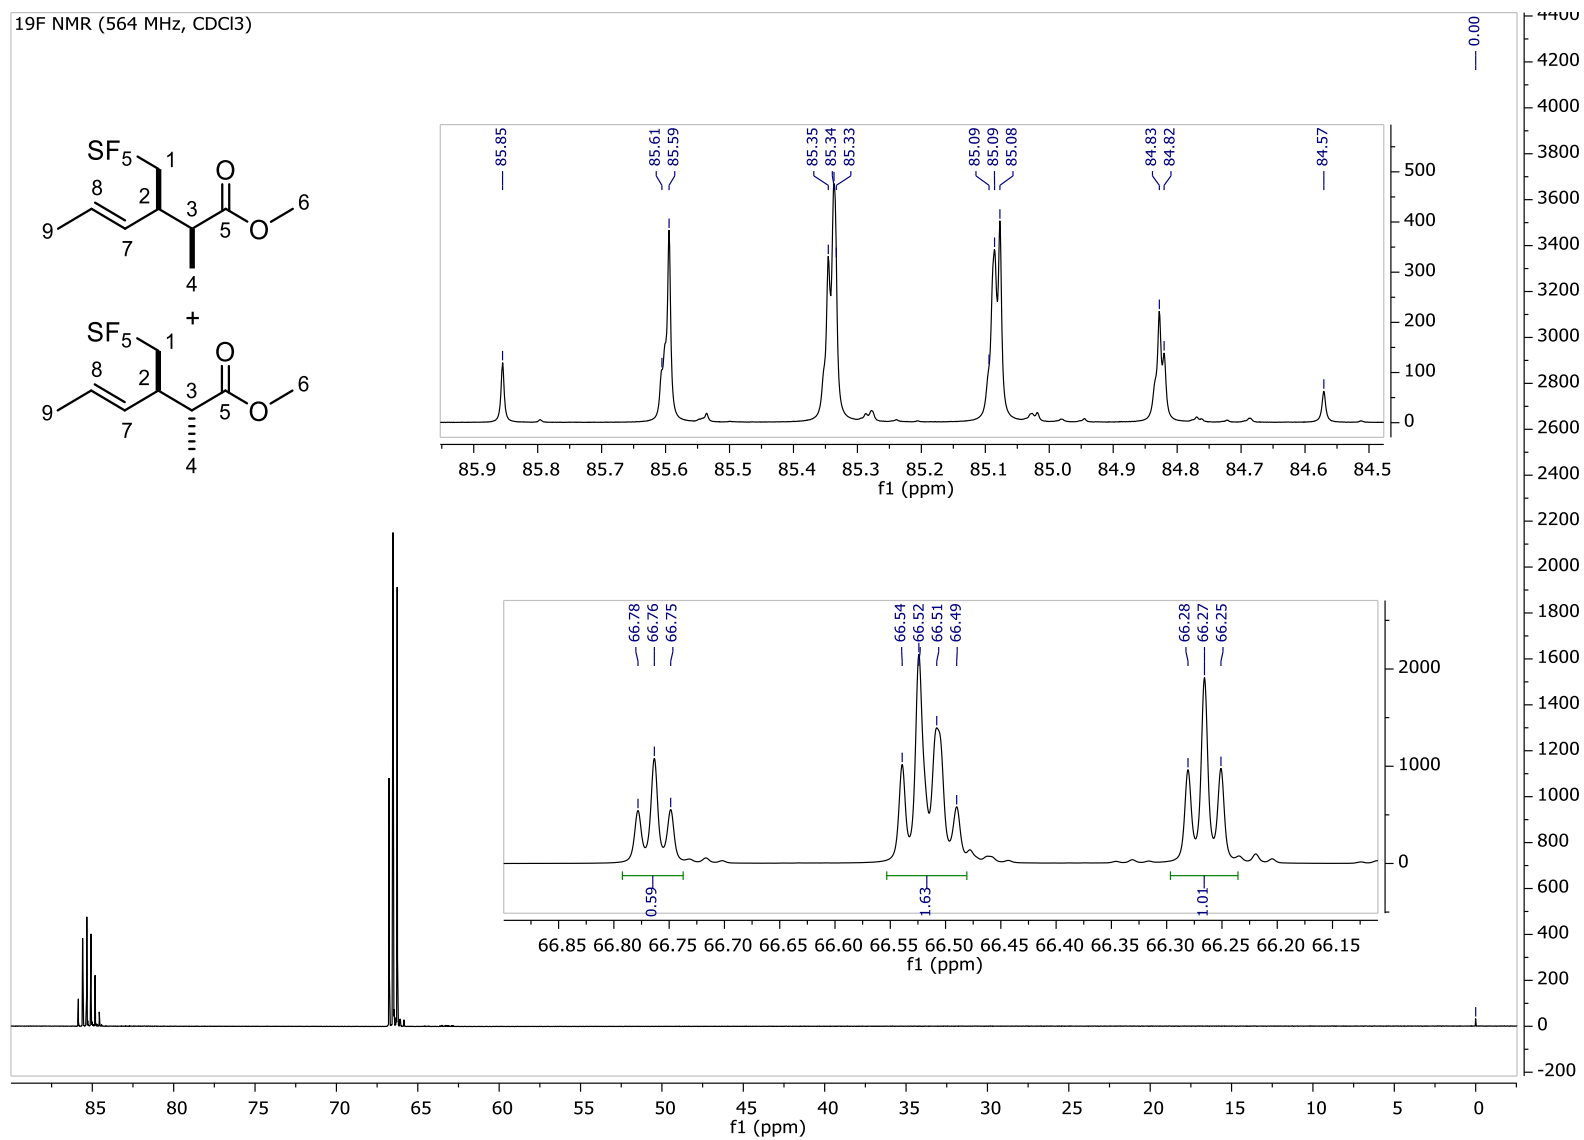

<sup>1</sup>H NMR spectrum of compound **29c**

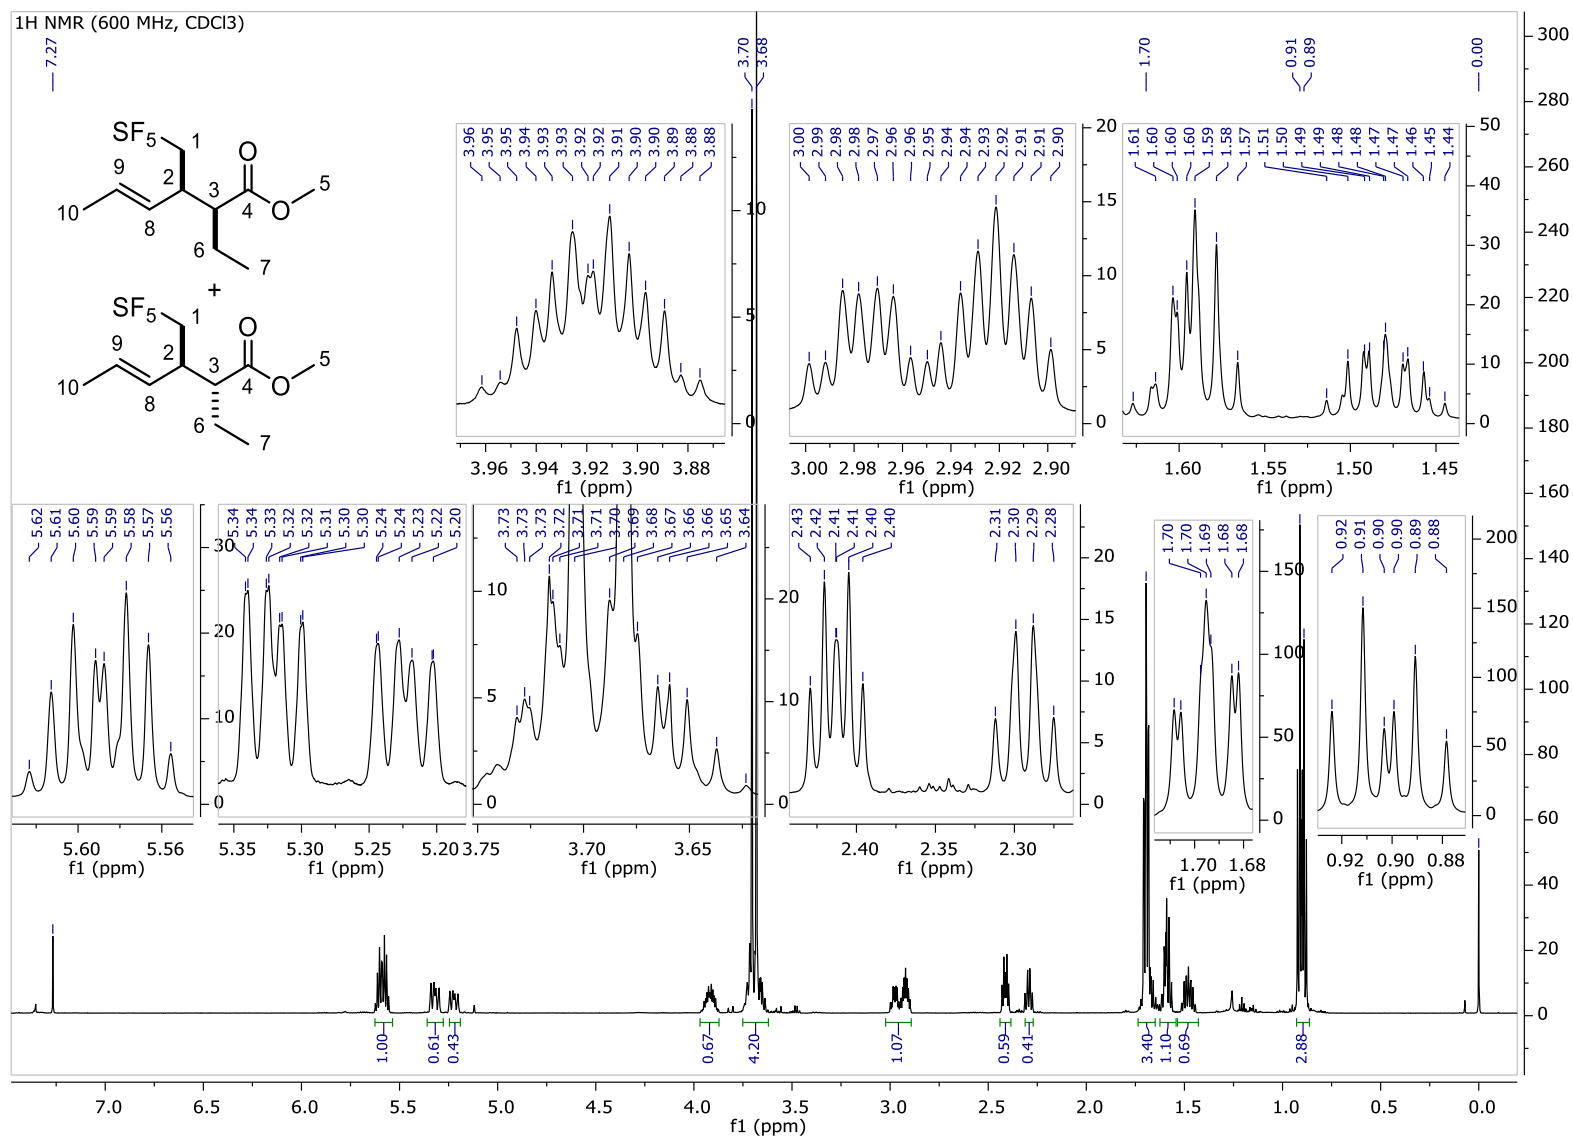



<sup>13</sup>C NMR spectrum of compound **29c**

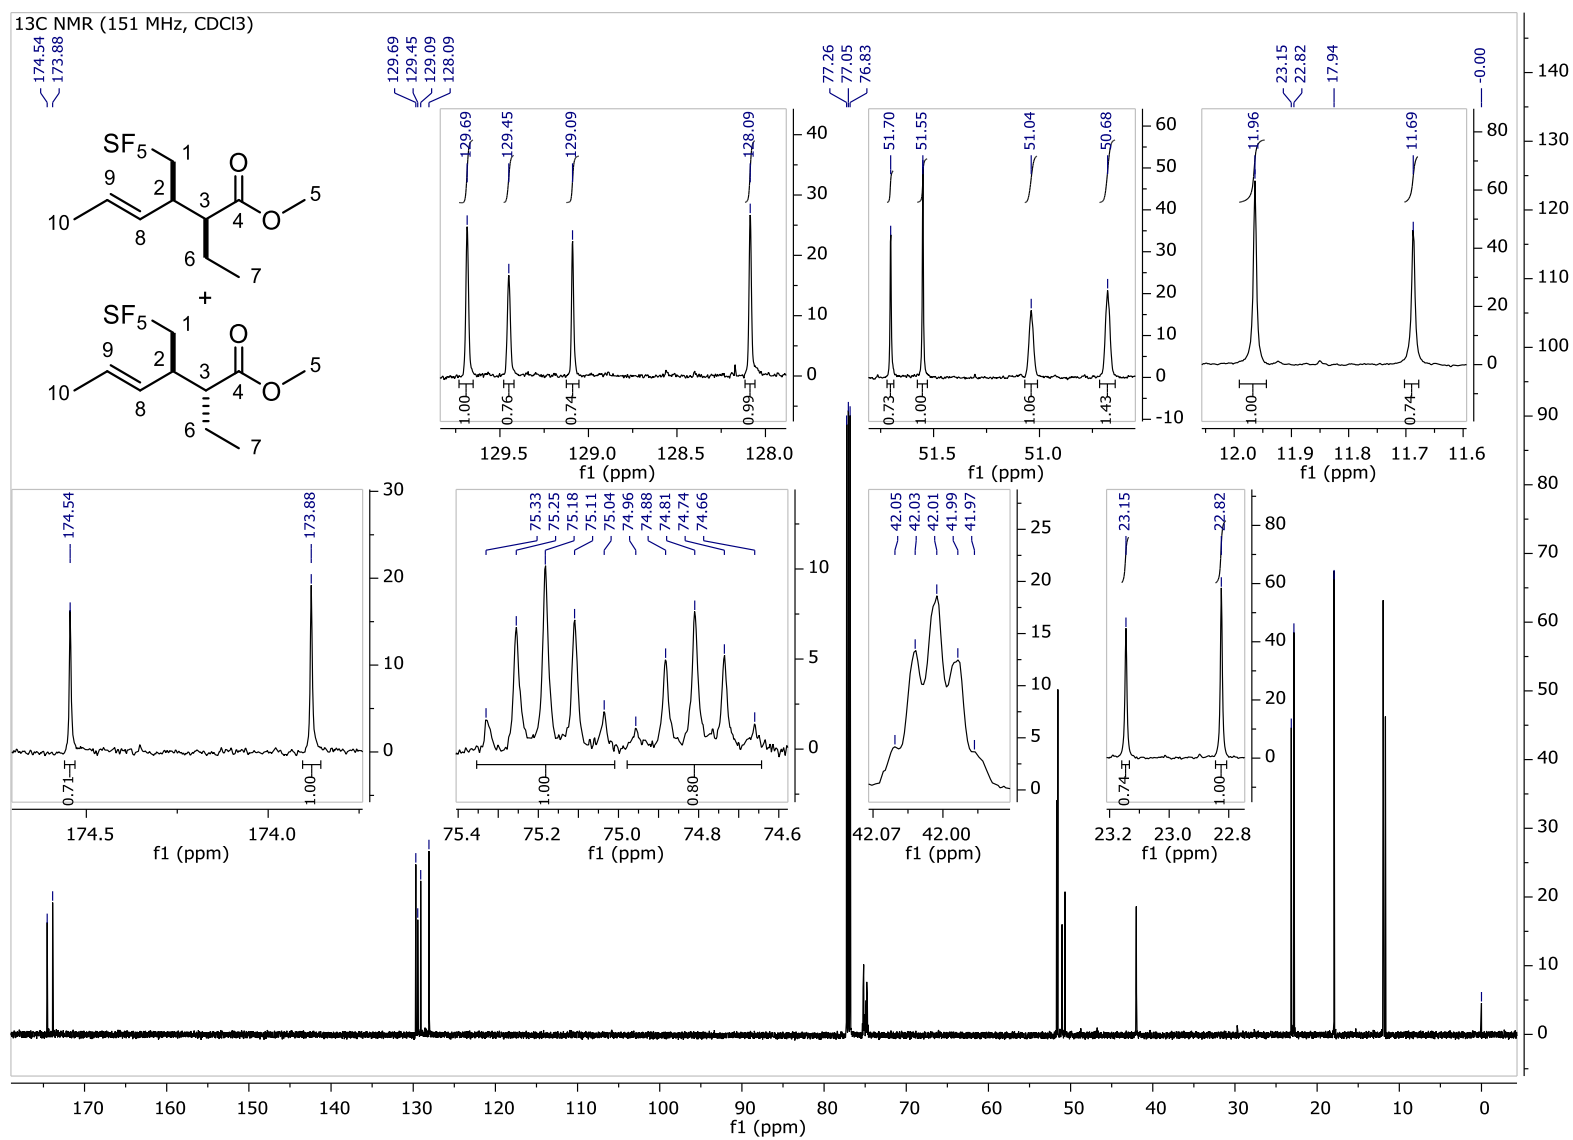

<sup>19</sup>F NMR spectrum of compound **29c**

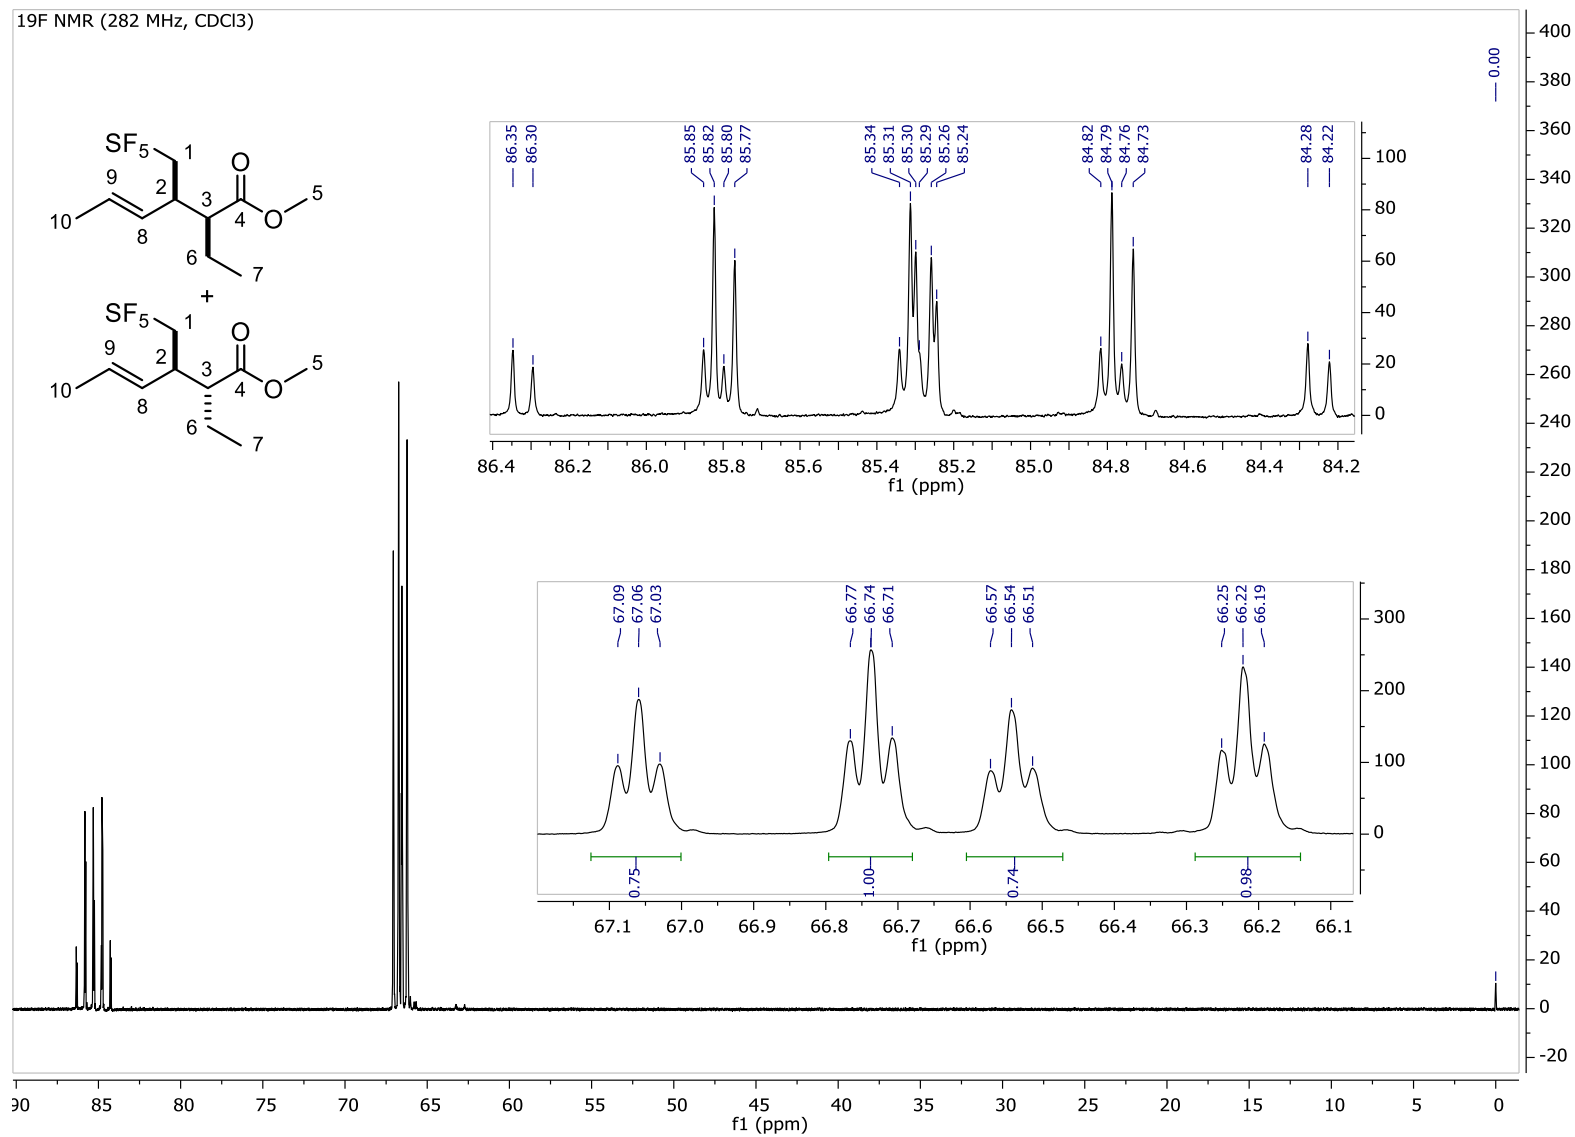

<sup>1</sup>H NMR spectrum of compound 29d

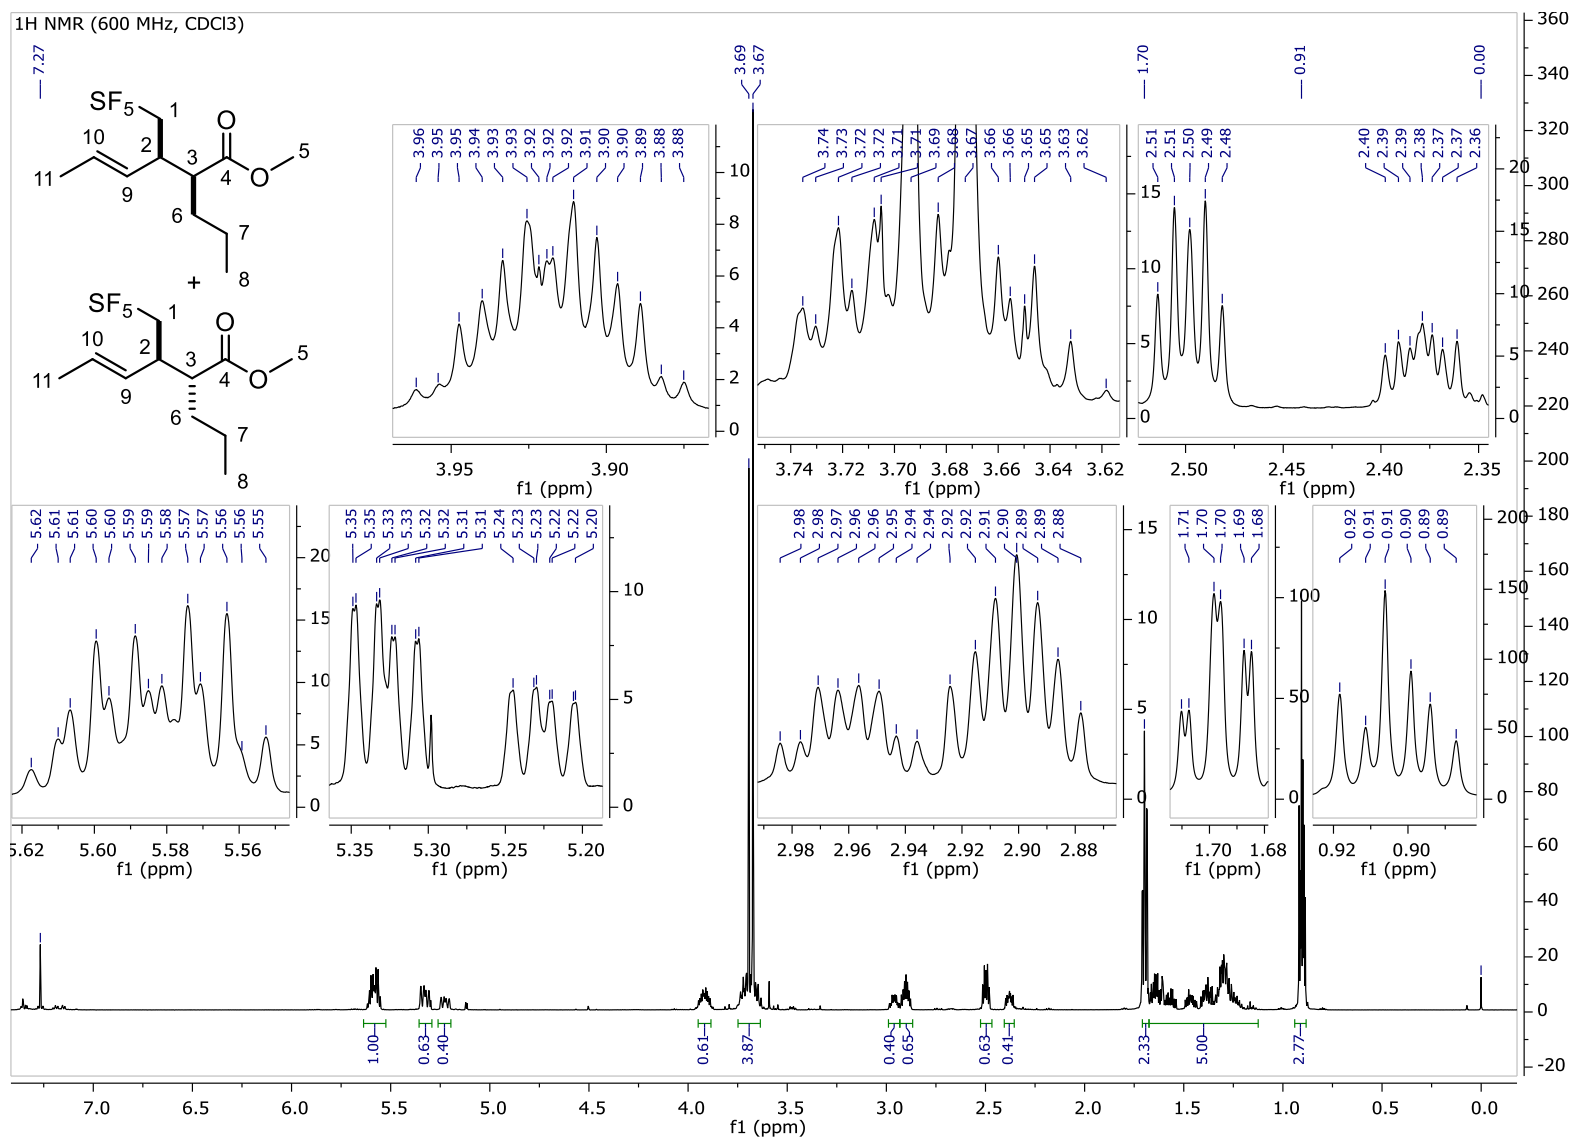

<sup>1</sup>H NMR spectrum of compound **29d** (cutout 1.20 to 1.67 ppm)

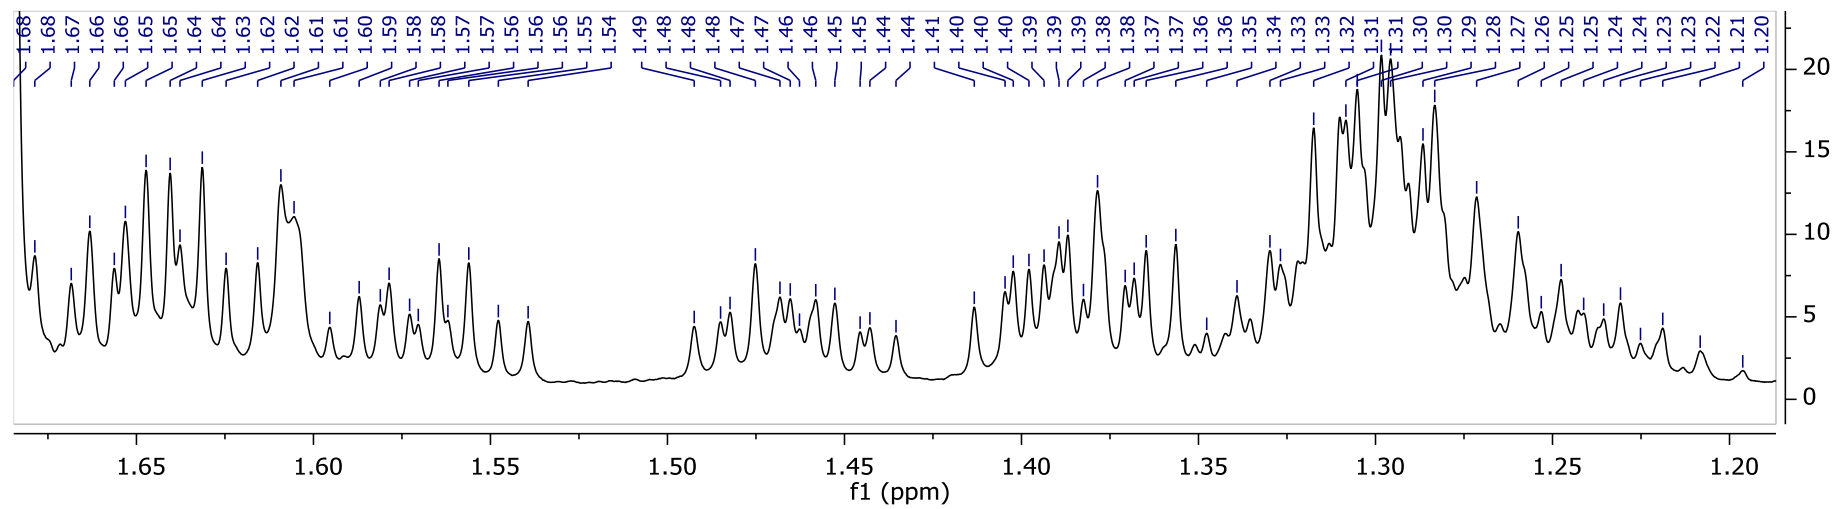

<sup>13</sup>C NMR spectrum of compound 29d

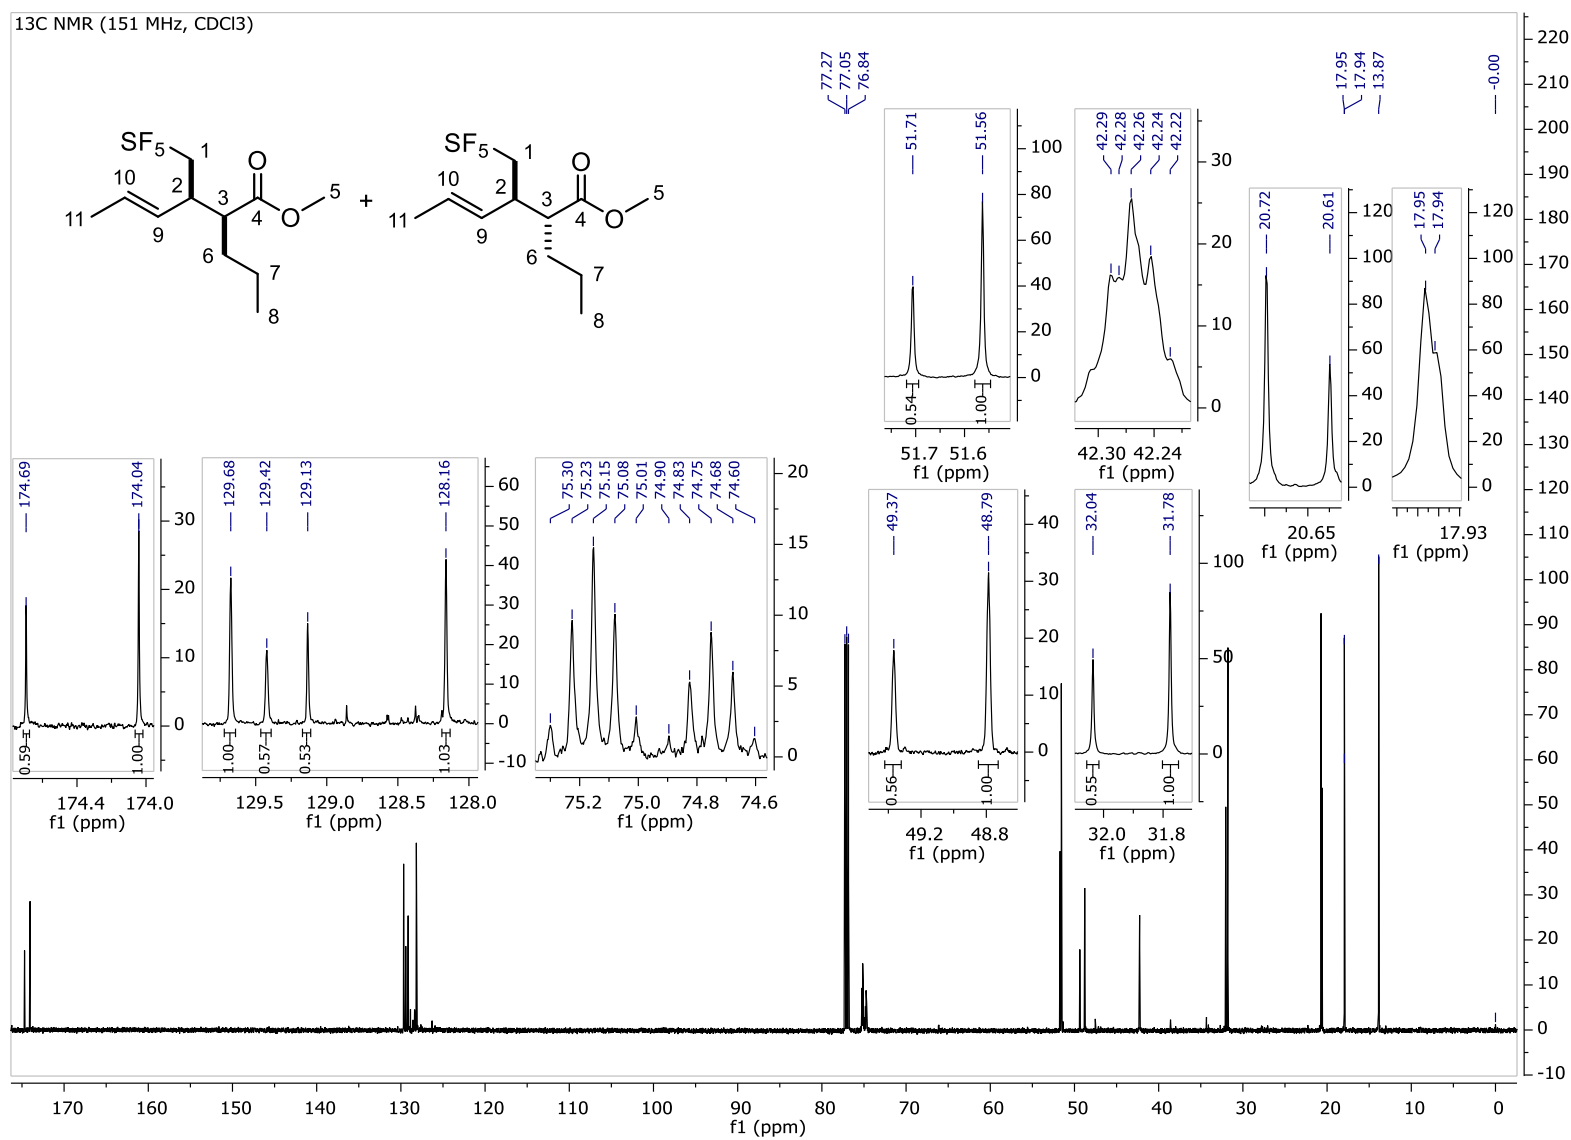

<sup>19</sup>F NMR spectrum of compound **29d**

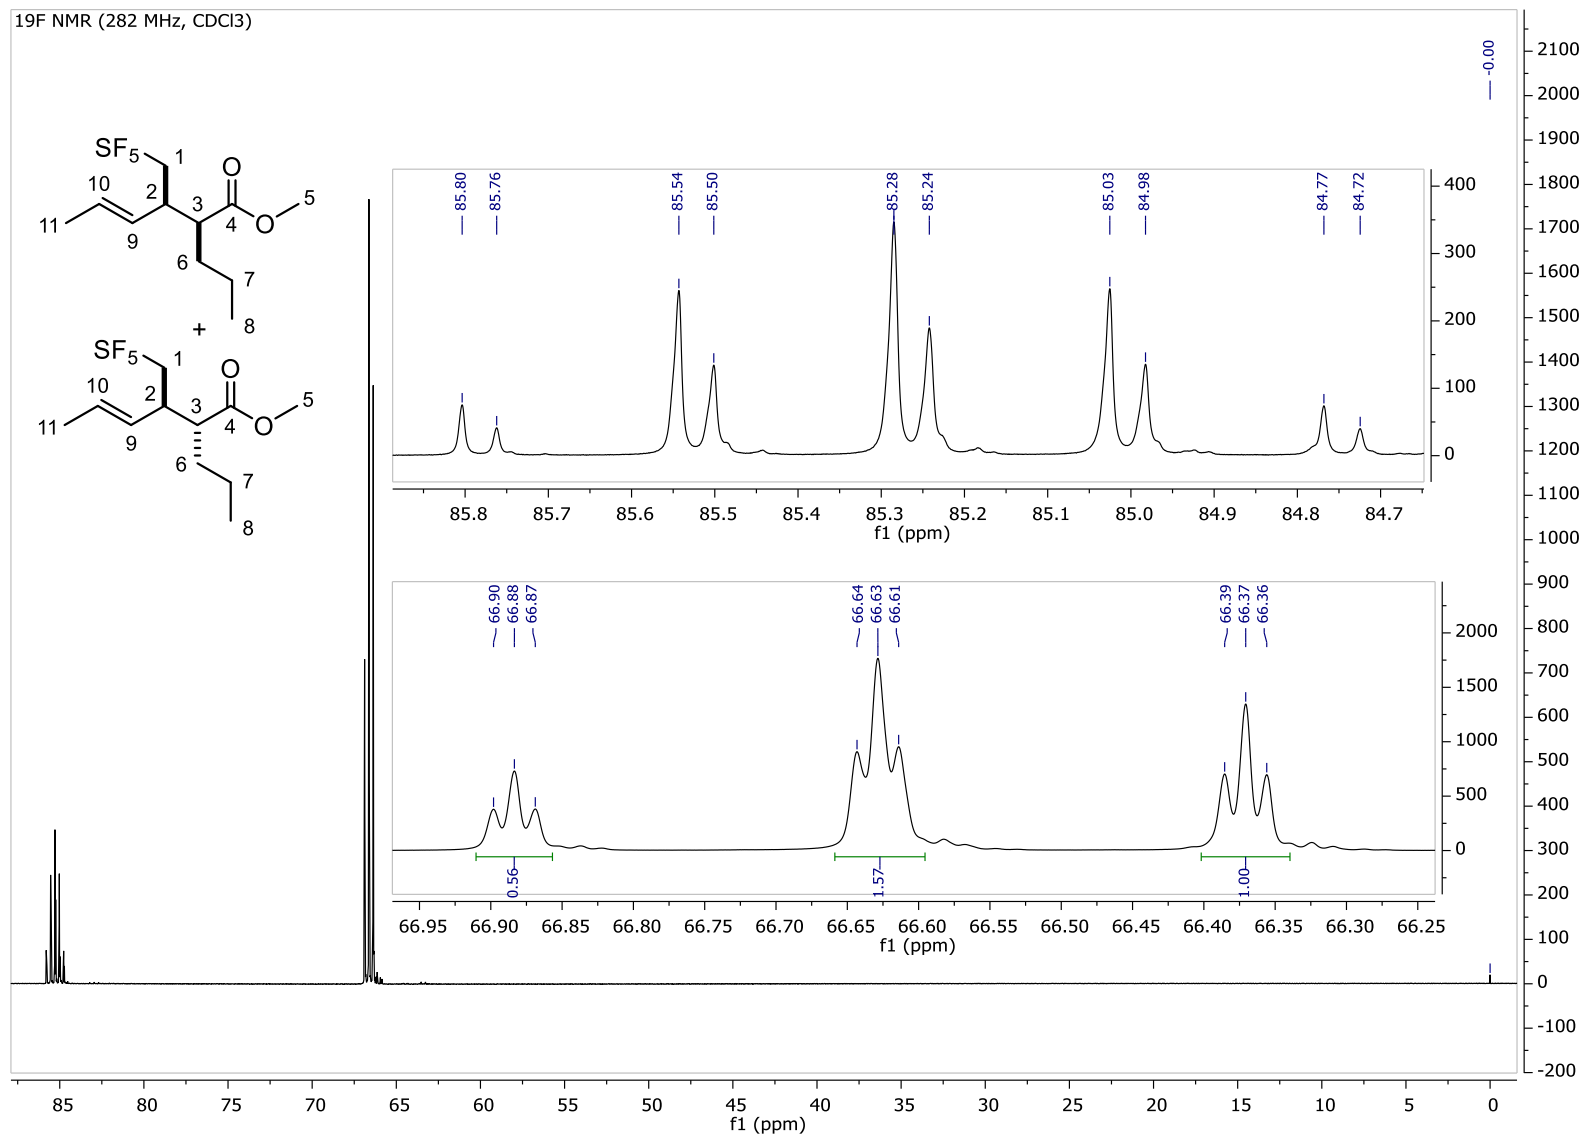

<sup>1</sup>H NMR spectrum of compound 29e

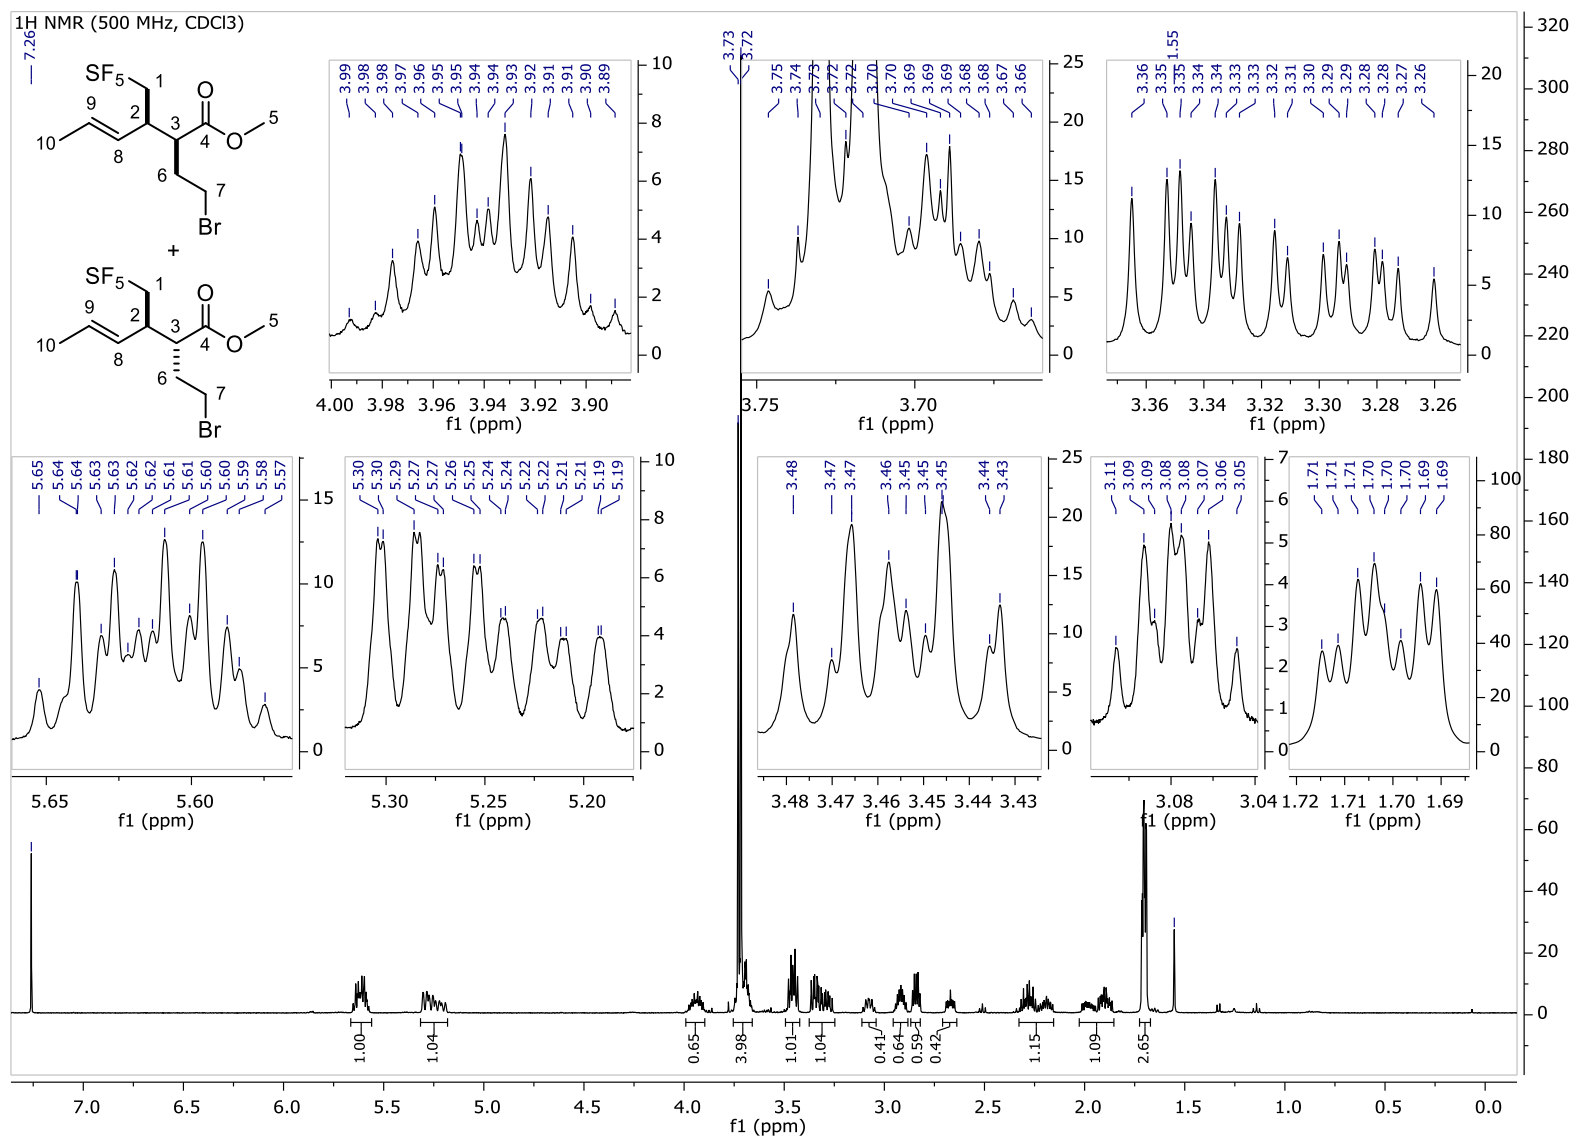

<sup>1</sup>H NMR spectrum of compound **29e**, cutout (1.85-2.95 ppm)

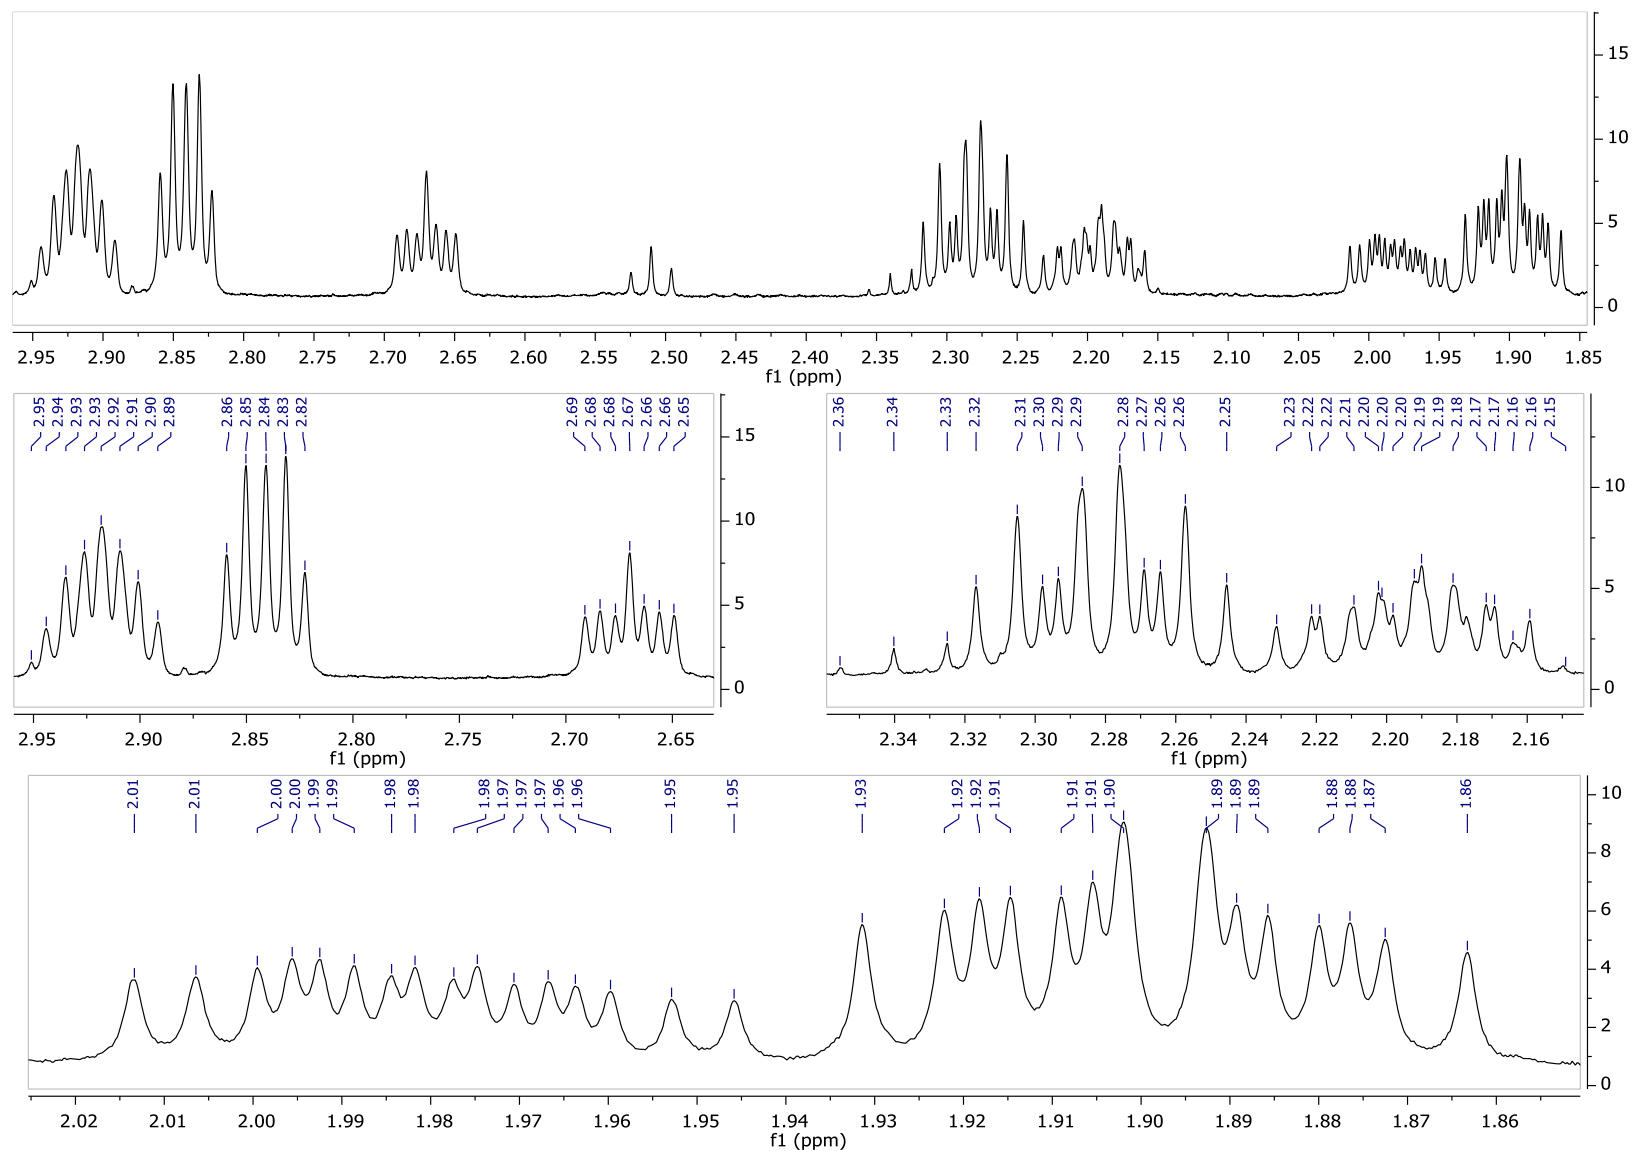



<sup>13</sup>C NMR spectrum of compound **29e**

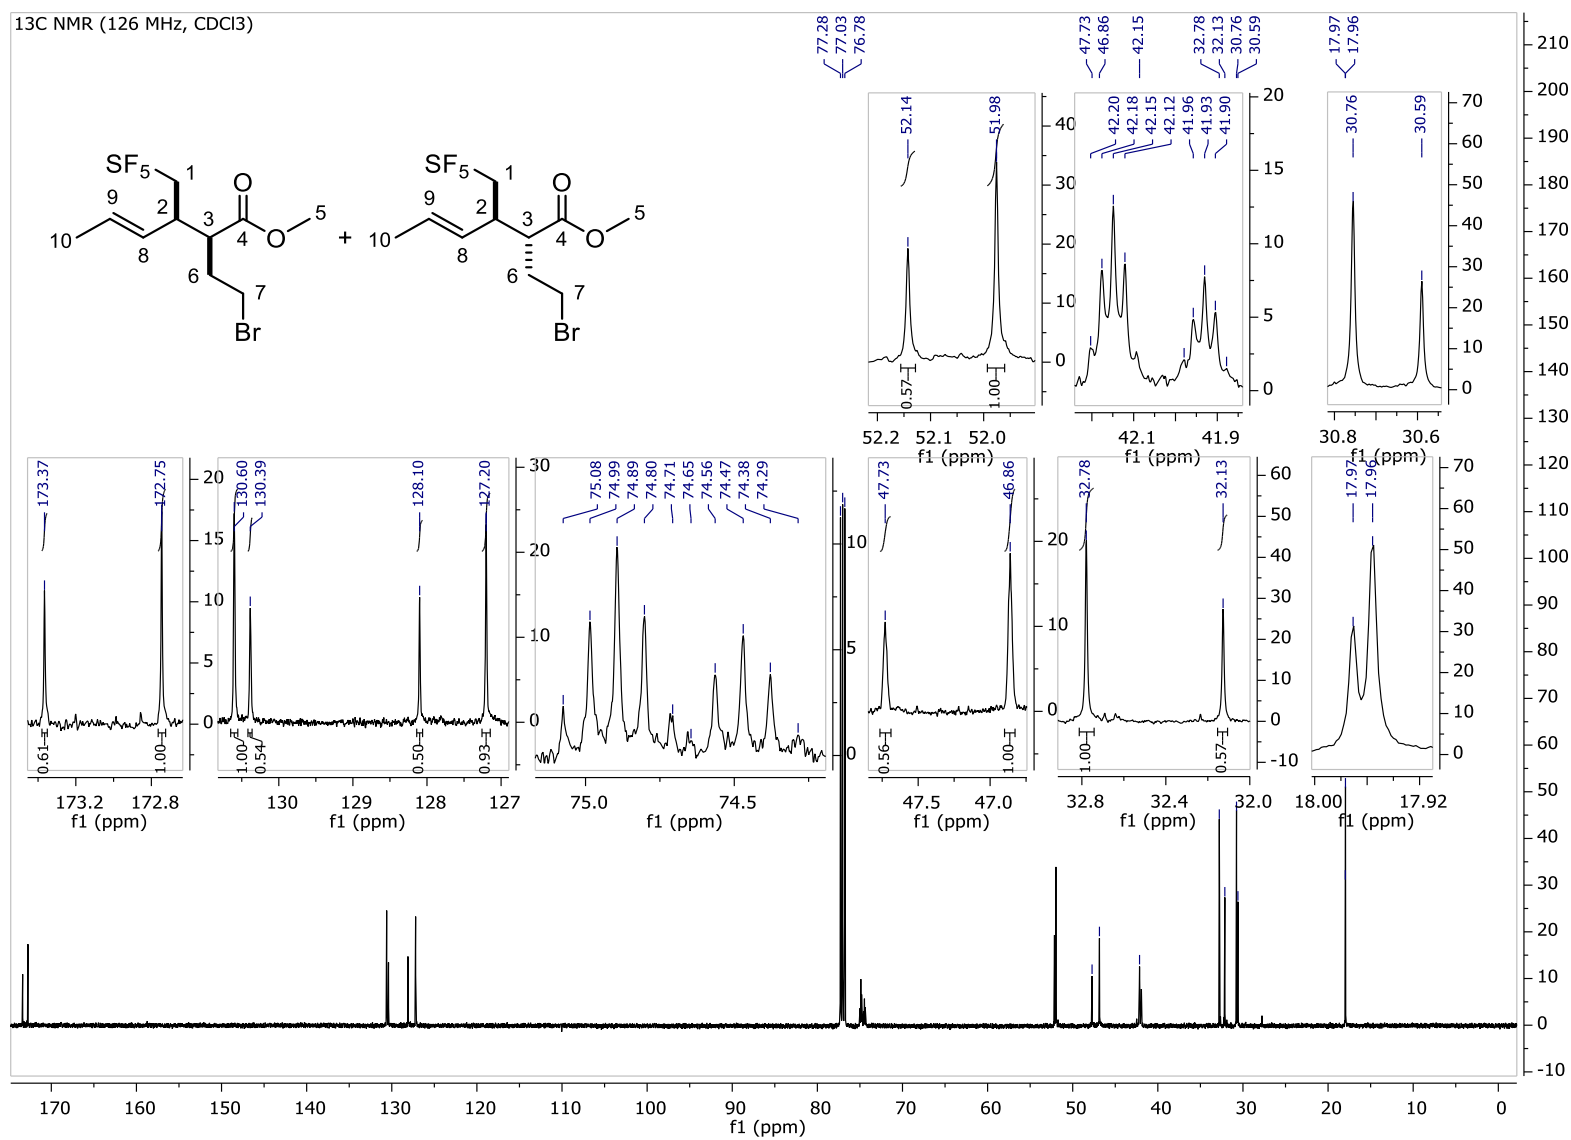

<sup>19</sup>F NMR spectrum of compound **29e**

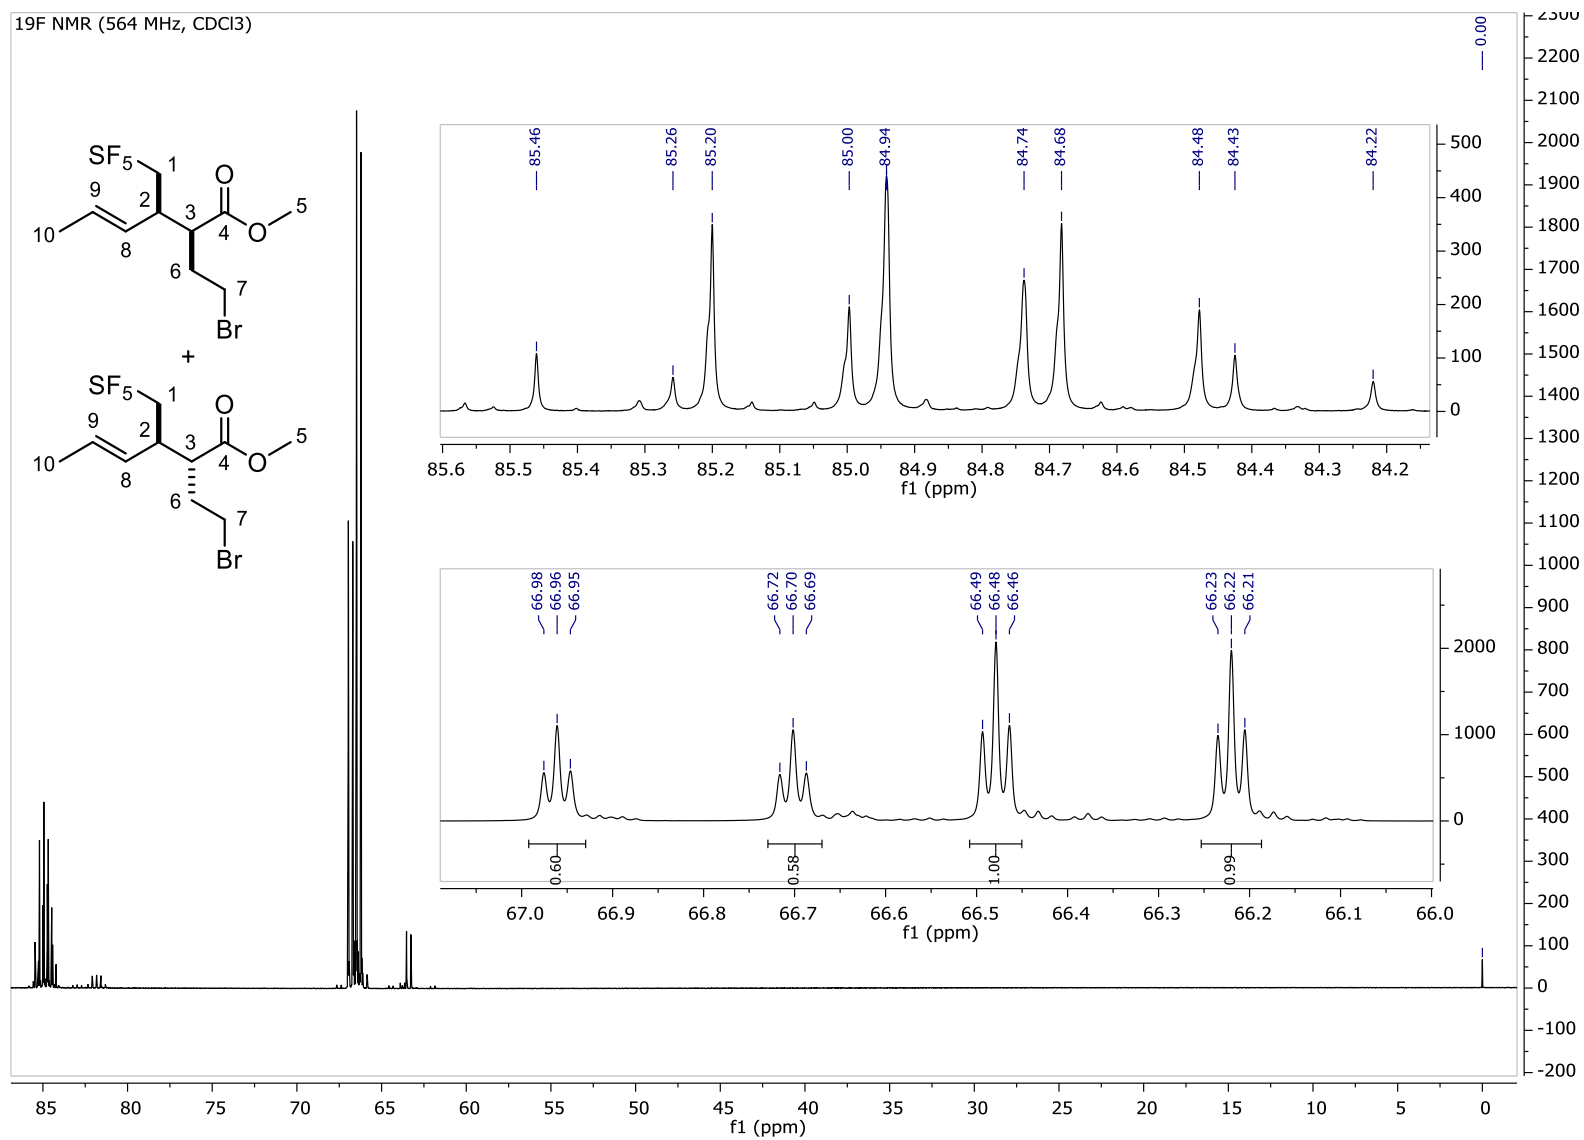

<sup>1</sup>H NMR spectrum of compound **29f**

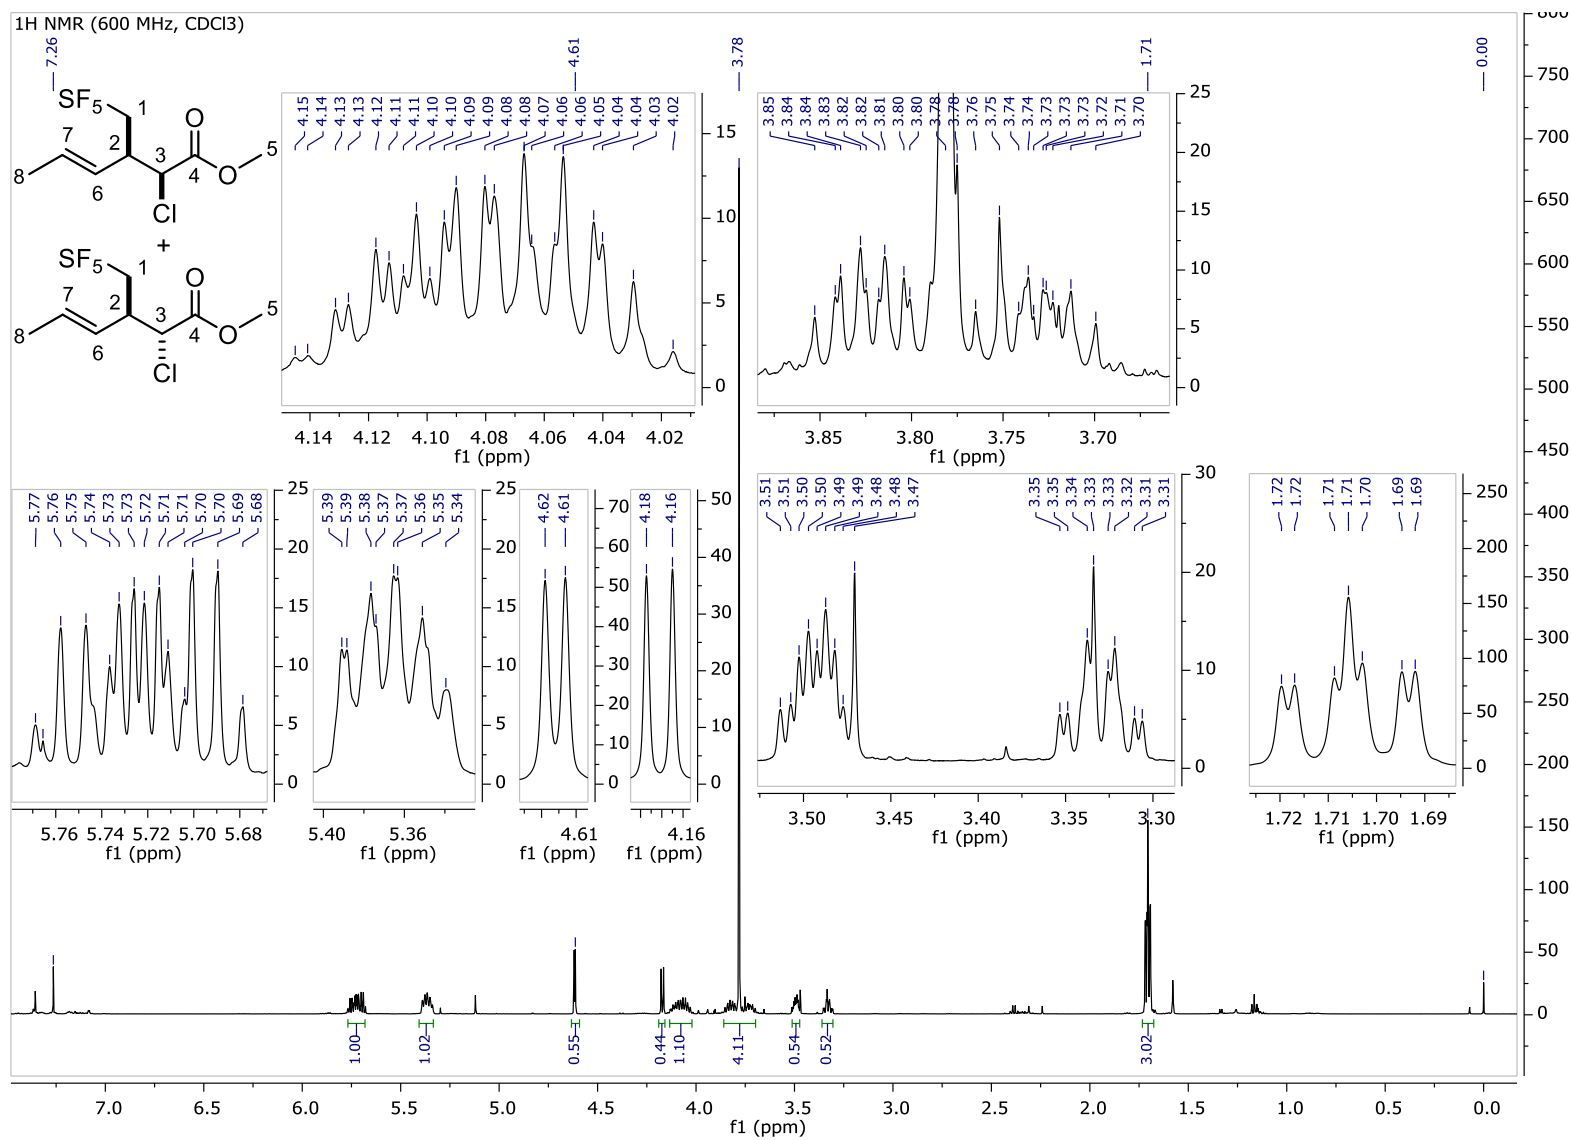

<sup>13</sup>C NMR spectrum of compound **29f**

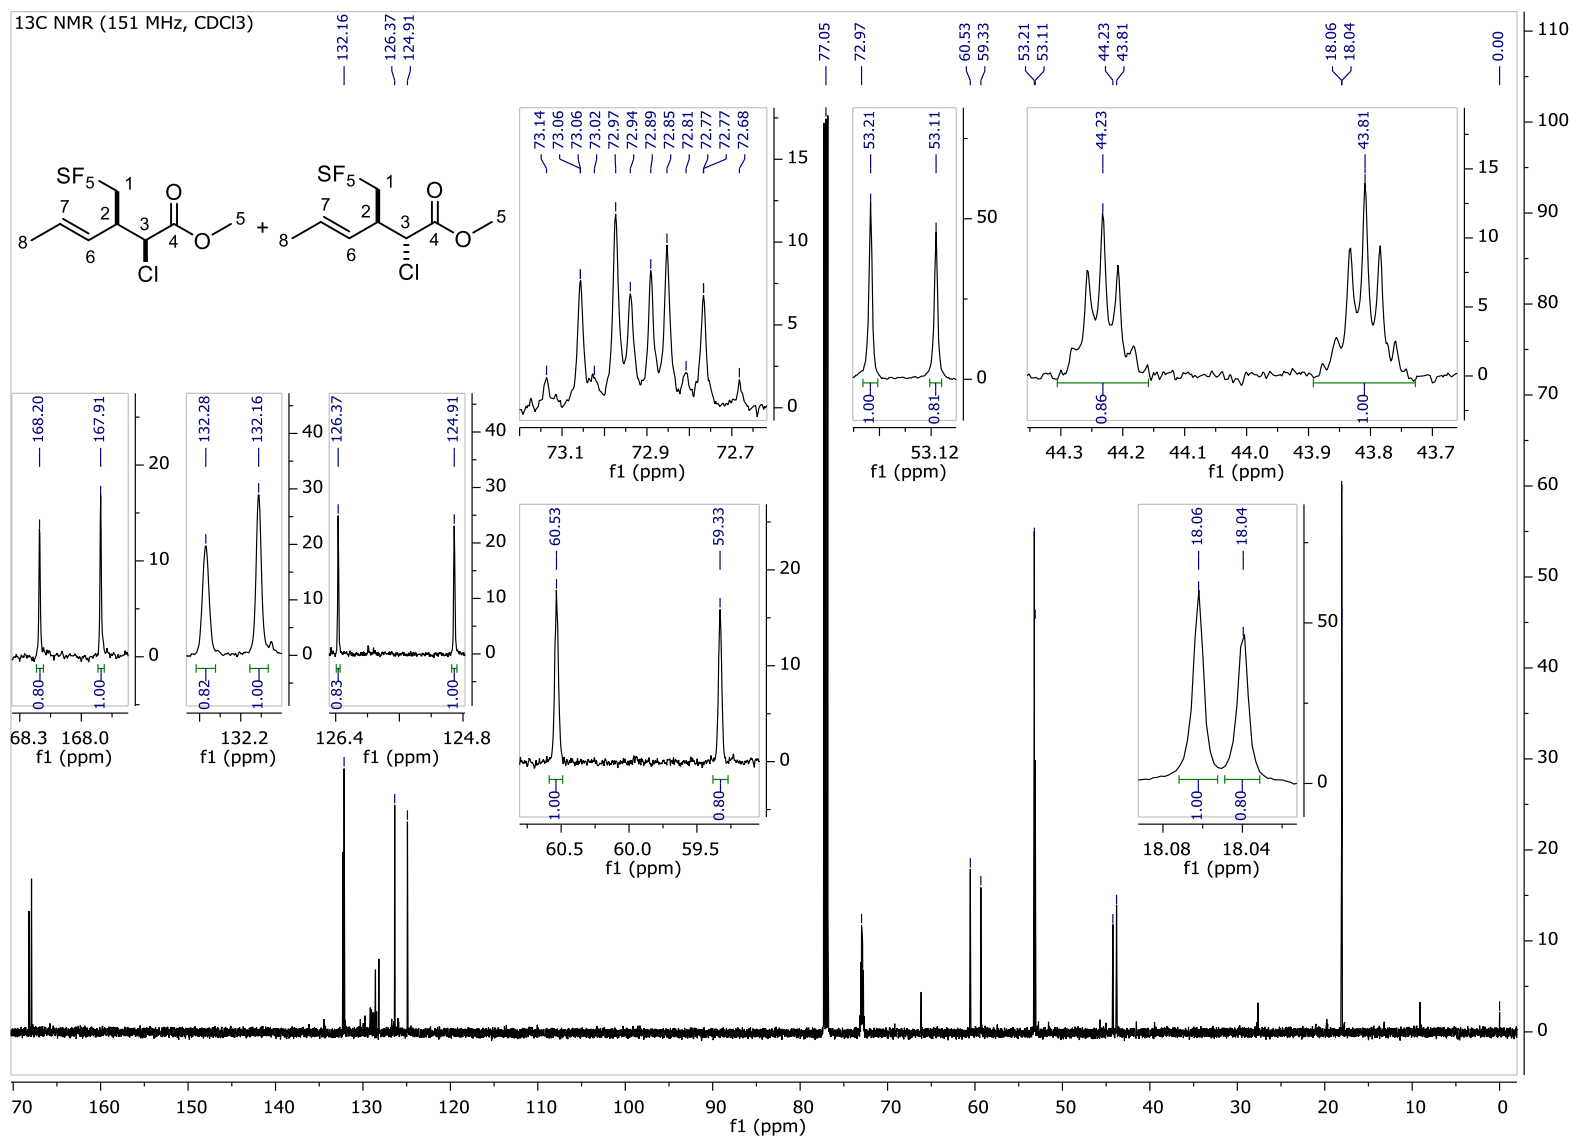

<sup>19</sup>F NMR spectrum of compound **29f**

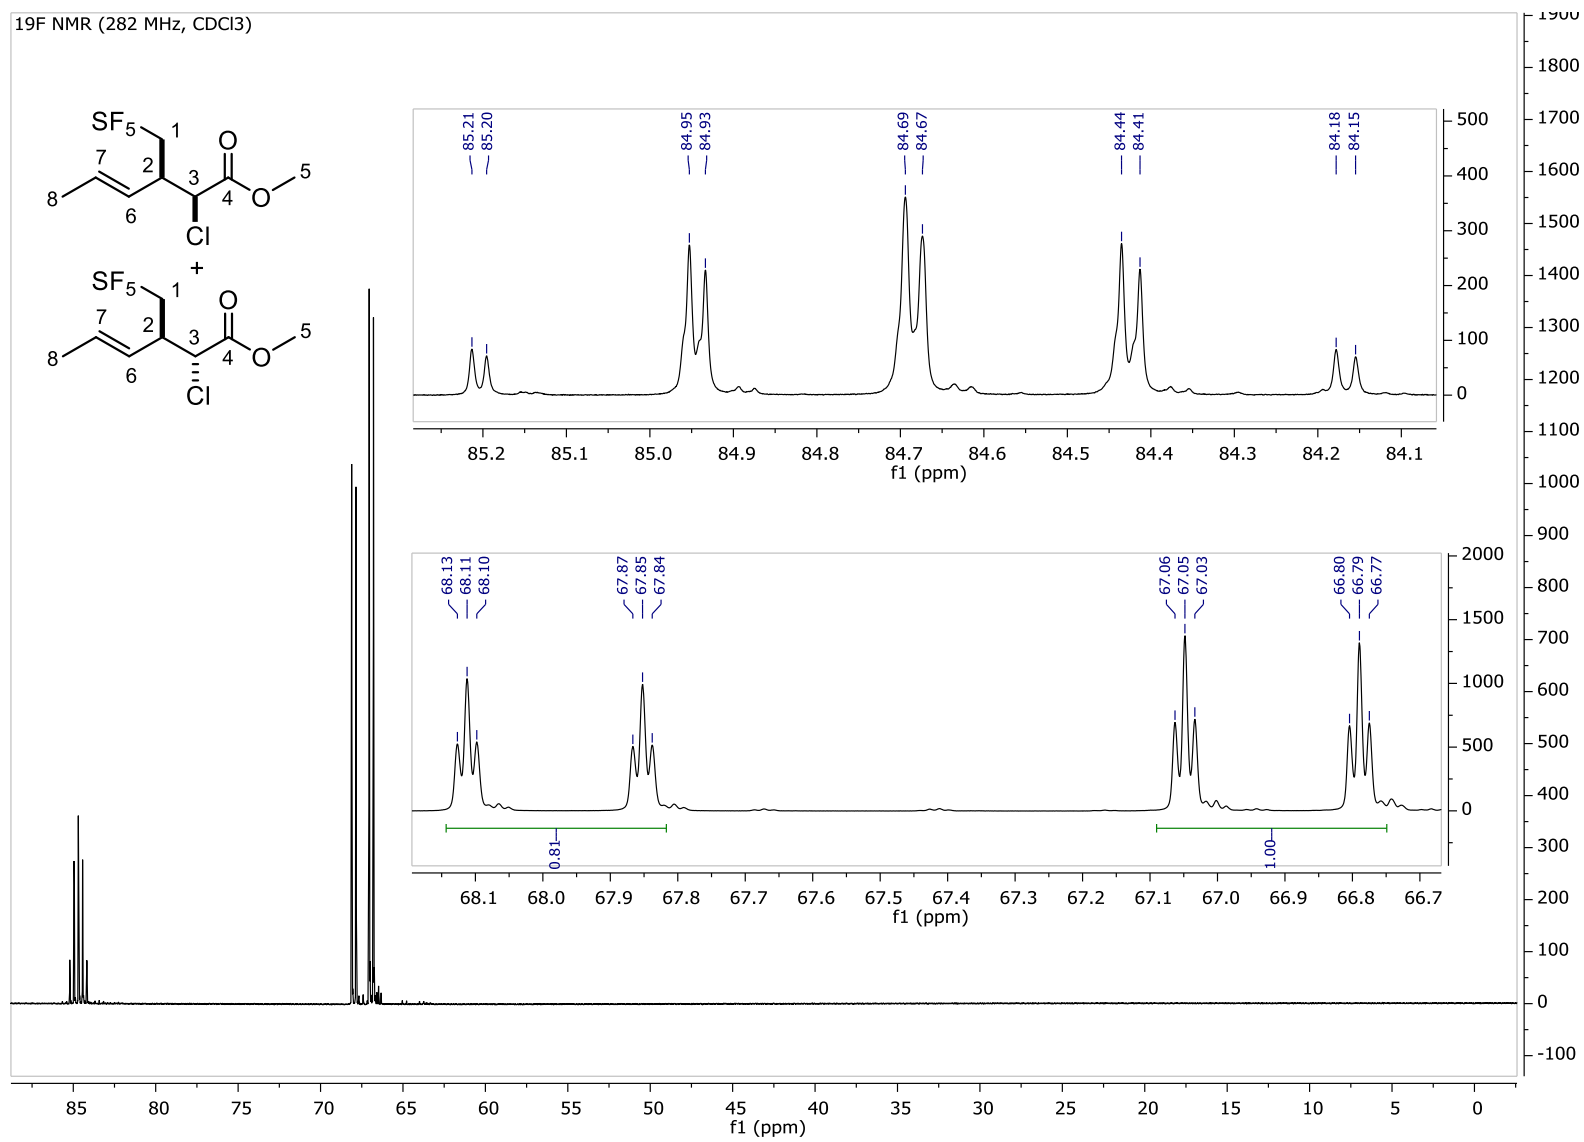

<sup>1</sup>H NMR spectrum of compound **31**

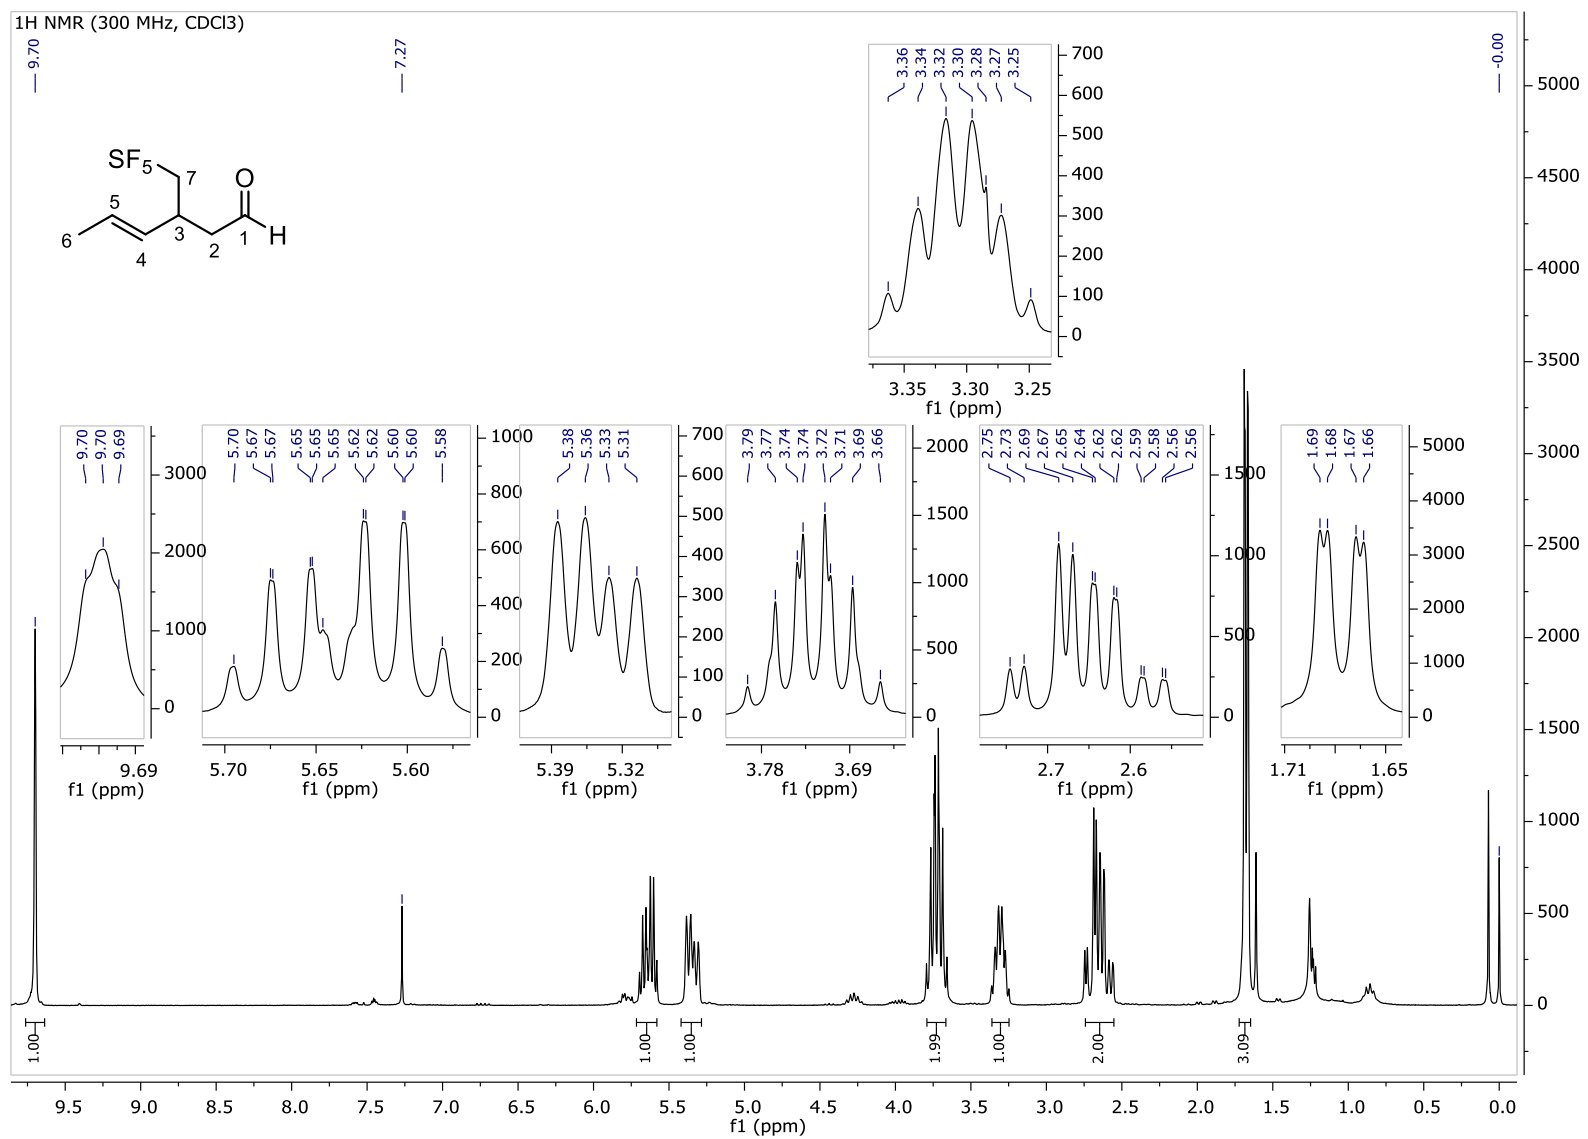

<sup>13</sup>C NMR spectrum of compound **31**

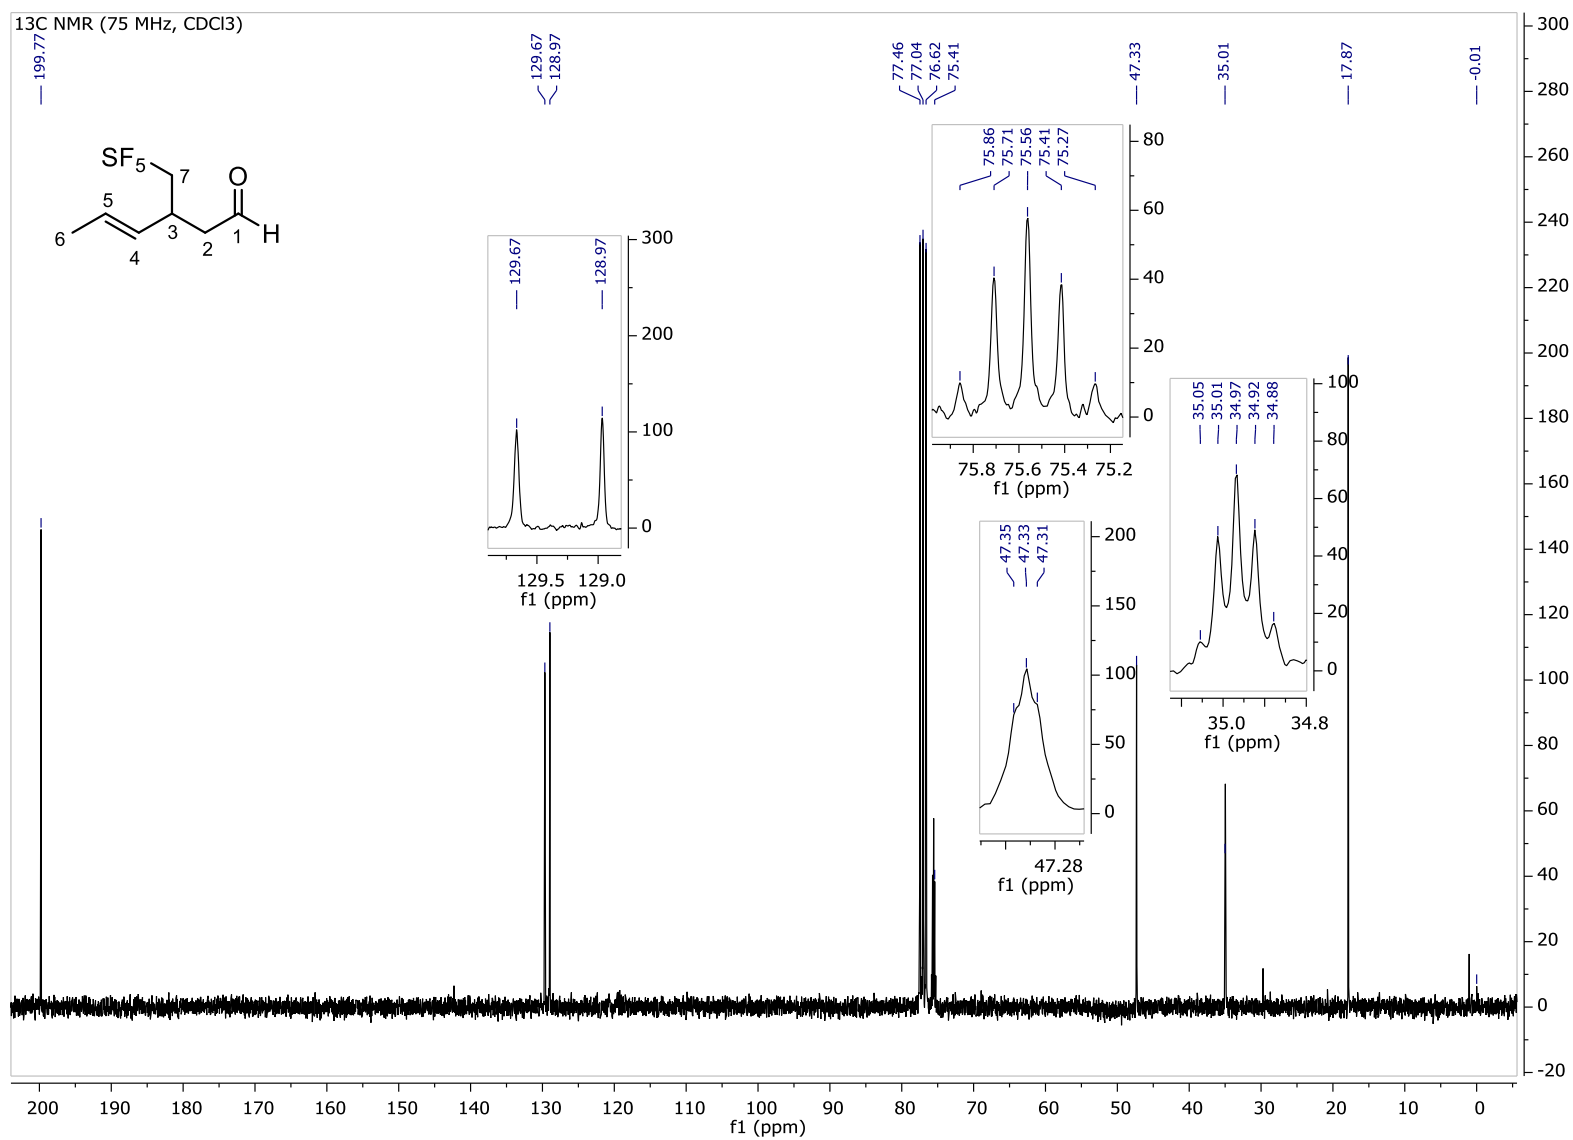

<sup>19</sup>F NMR spectrum of compound **31**

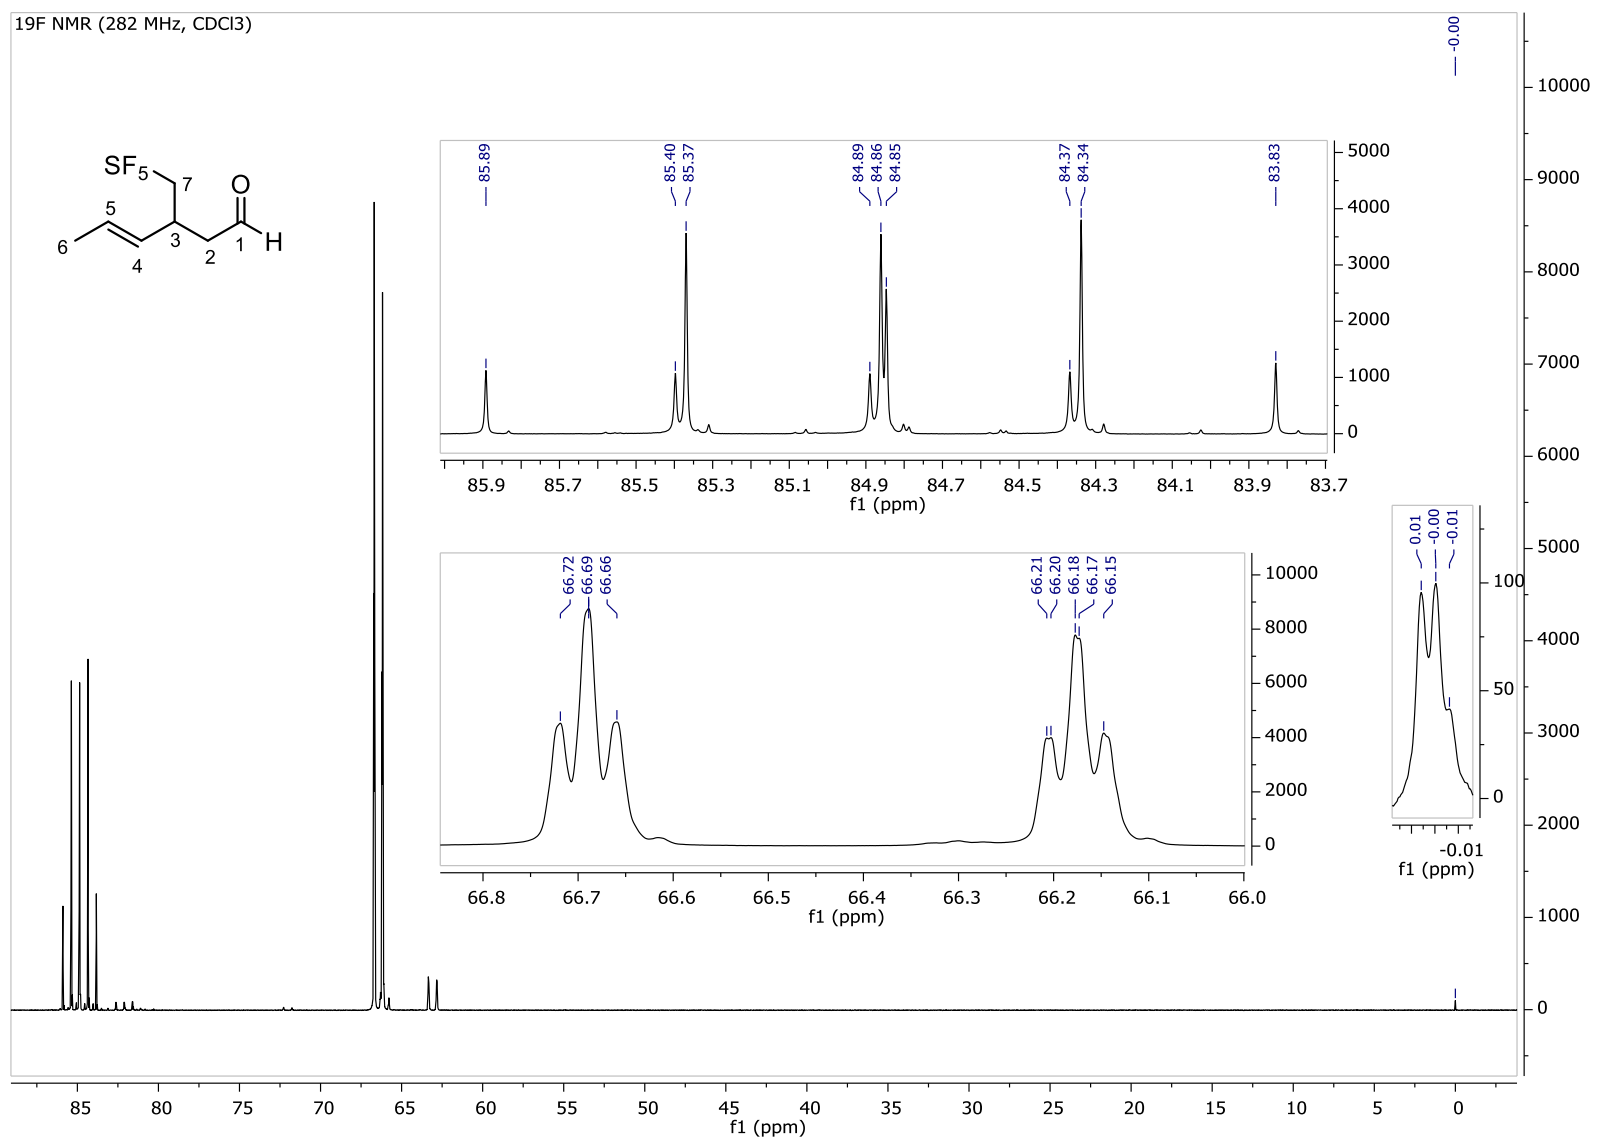



<sup>1</sup>H NMR spectrum of compound **30**

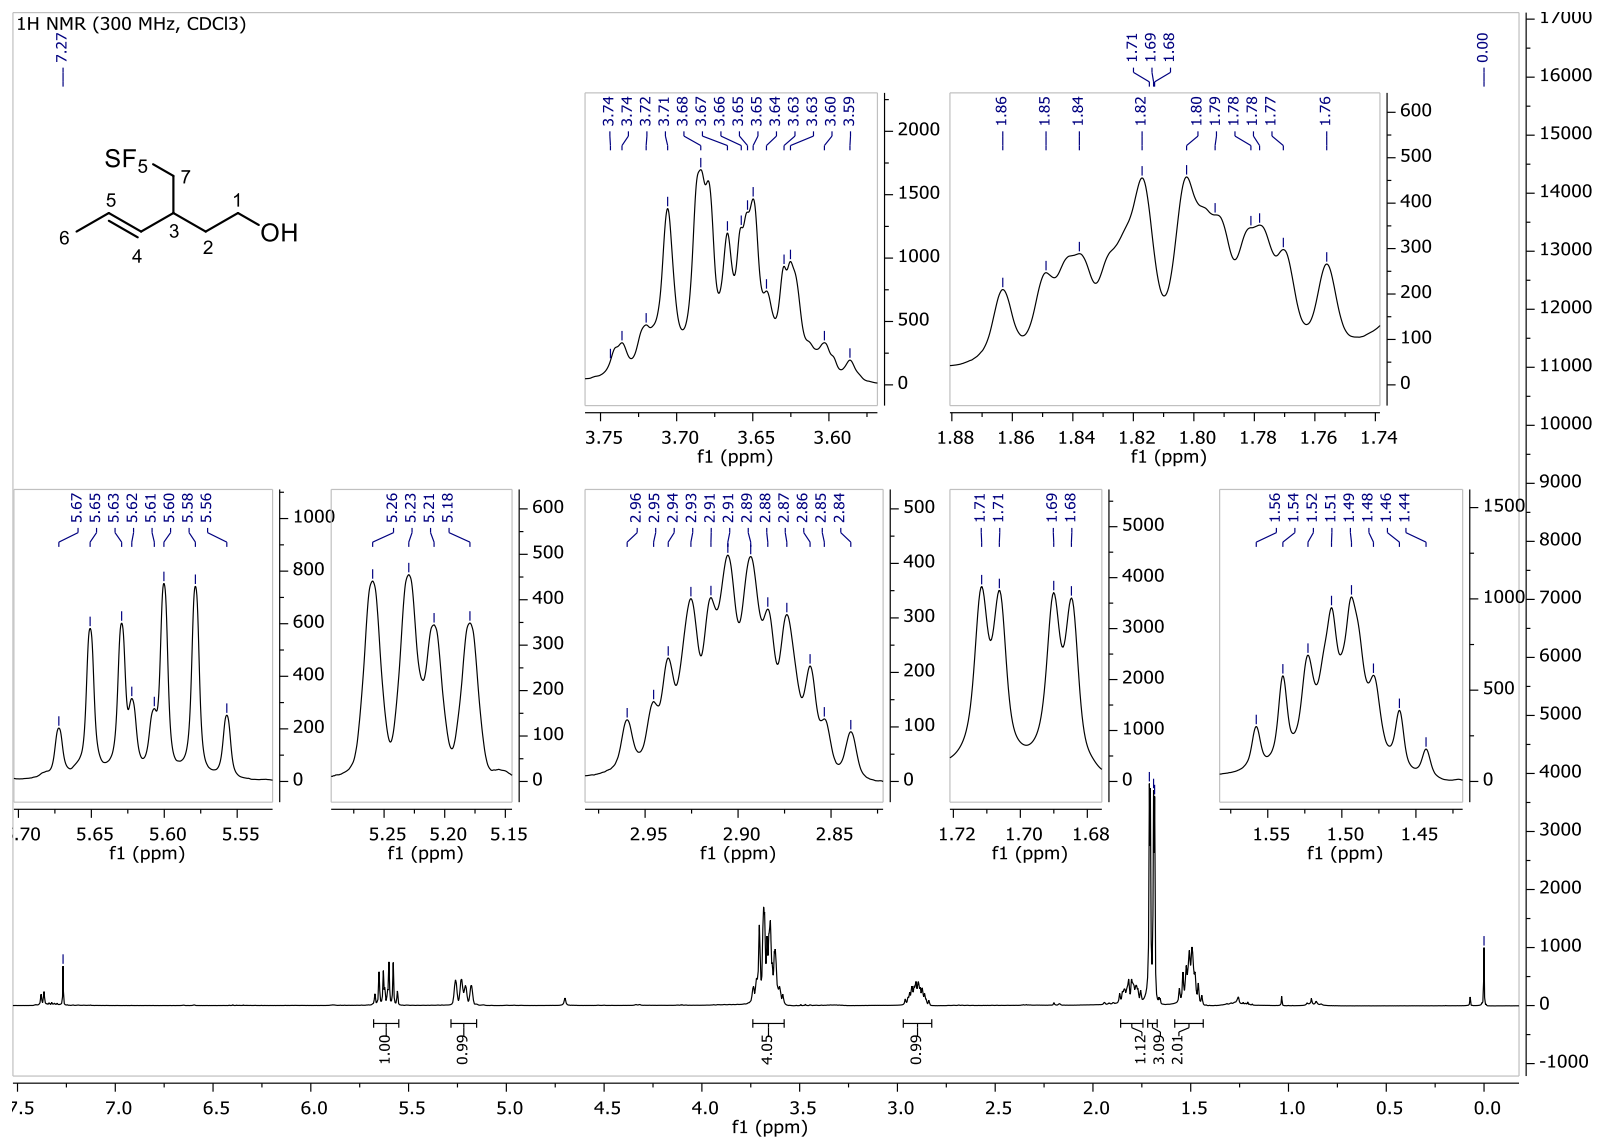



<sup>19</sup>F NMR spectrum of compound **30**

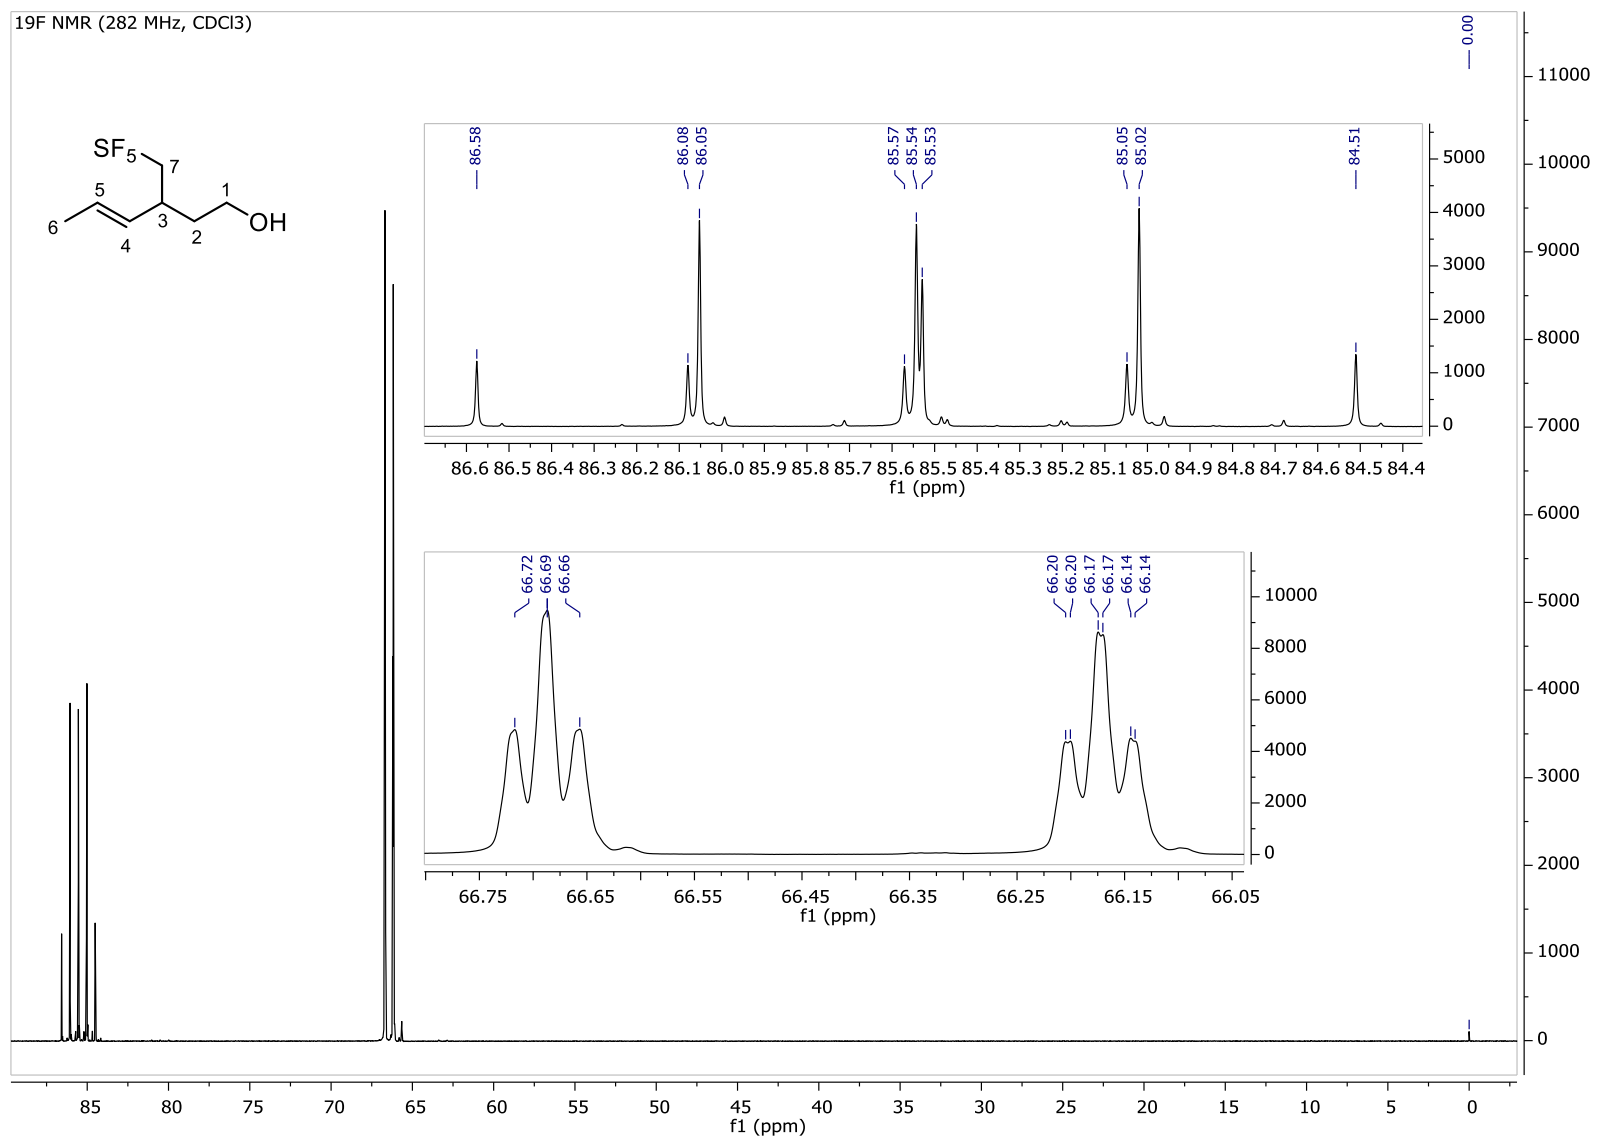

# <sup>1</sup>H NMR spectrum of compound 33b

Sep03-2015.430.fid  
hau dudzinski pdu 604 1  
proton CDCl3 /opt/topspin av1 53

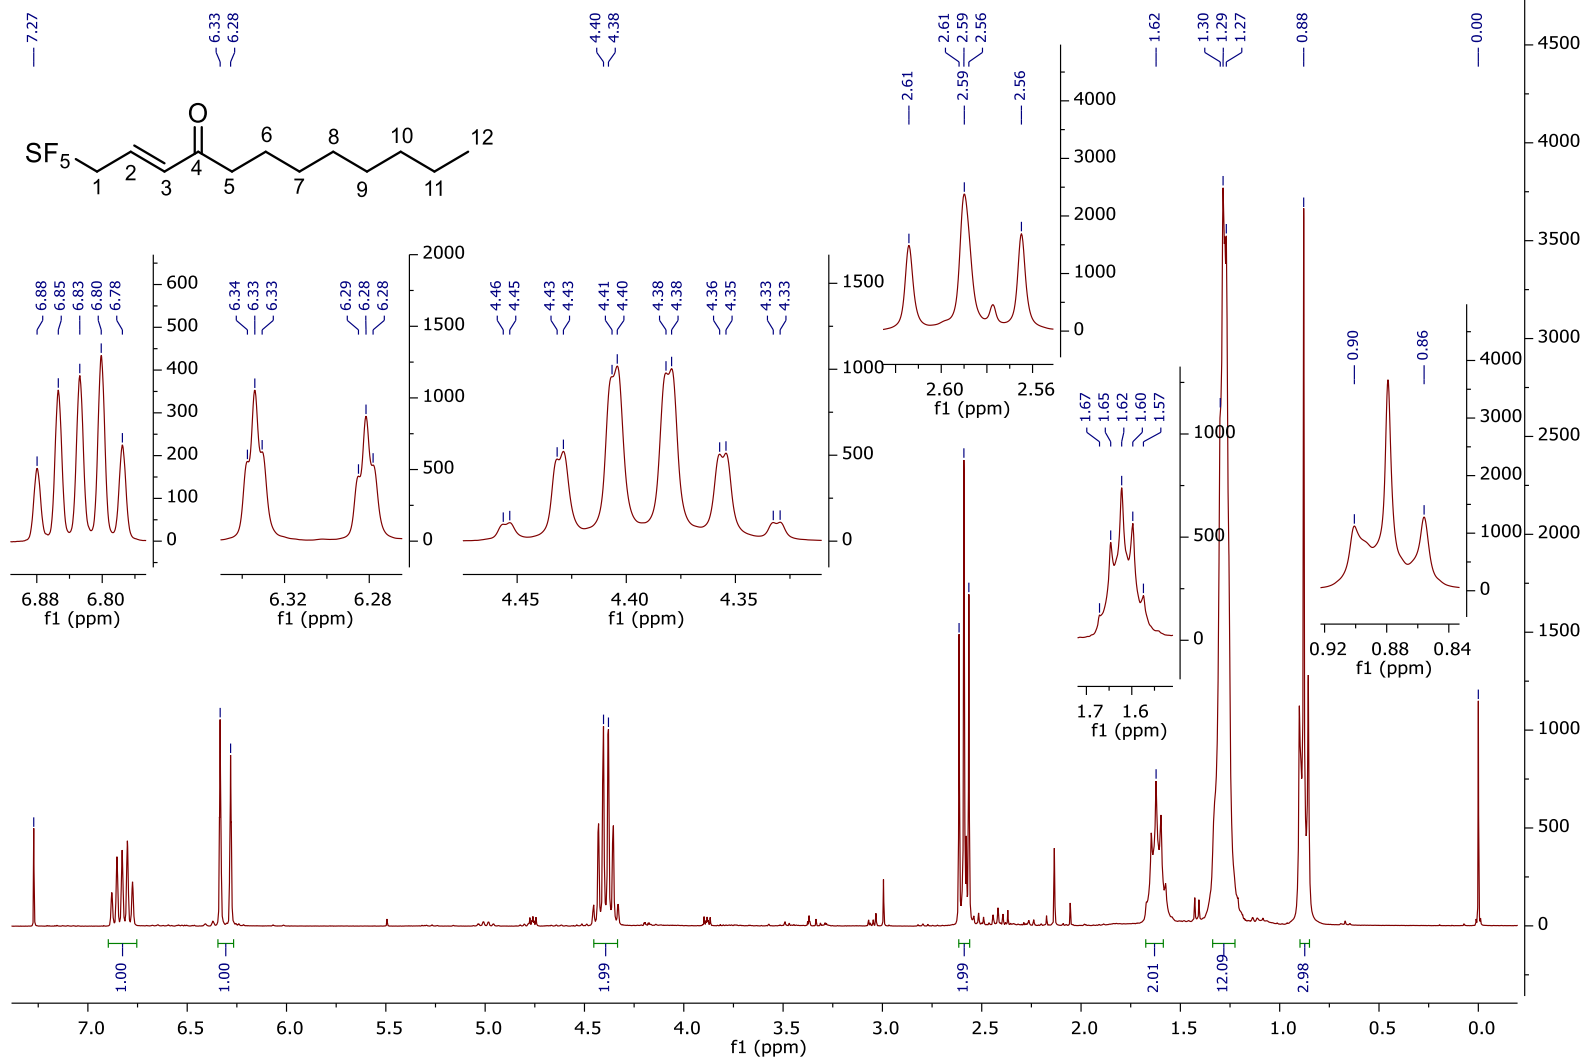

# <sup>13</sup>C NMR spectrum of compound **33b**

Sep03-2015.431.fid  
hau dudzinski pdu 604 1  
carbon CDCl<sub>3</sub> /opt/topspin av1 53

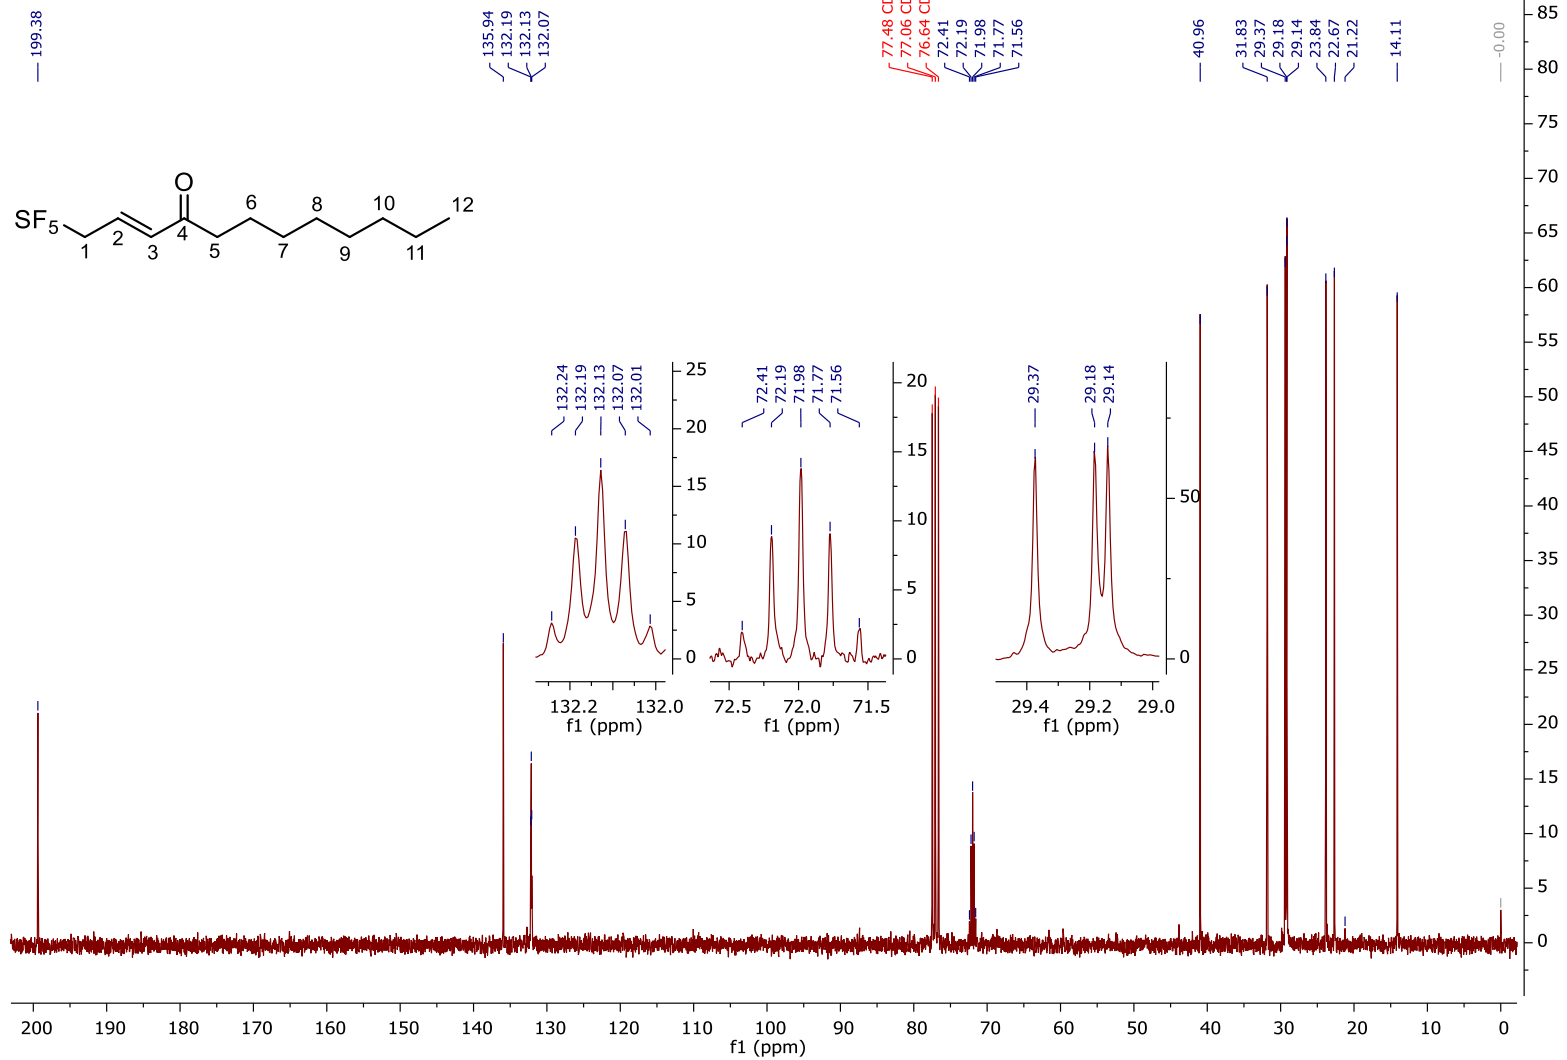

<sup>19</sup>F NMR spectrum of compound **33b**

Sep03-2015.434.fid  
hau dudzinski pdu 604 1  
f19\_200\_to\_0 CDCl3 /opt/topspin av1 53

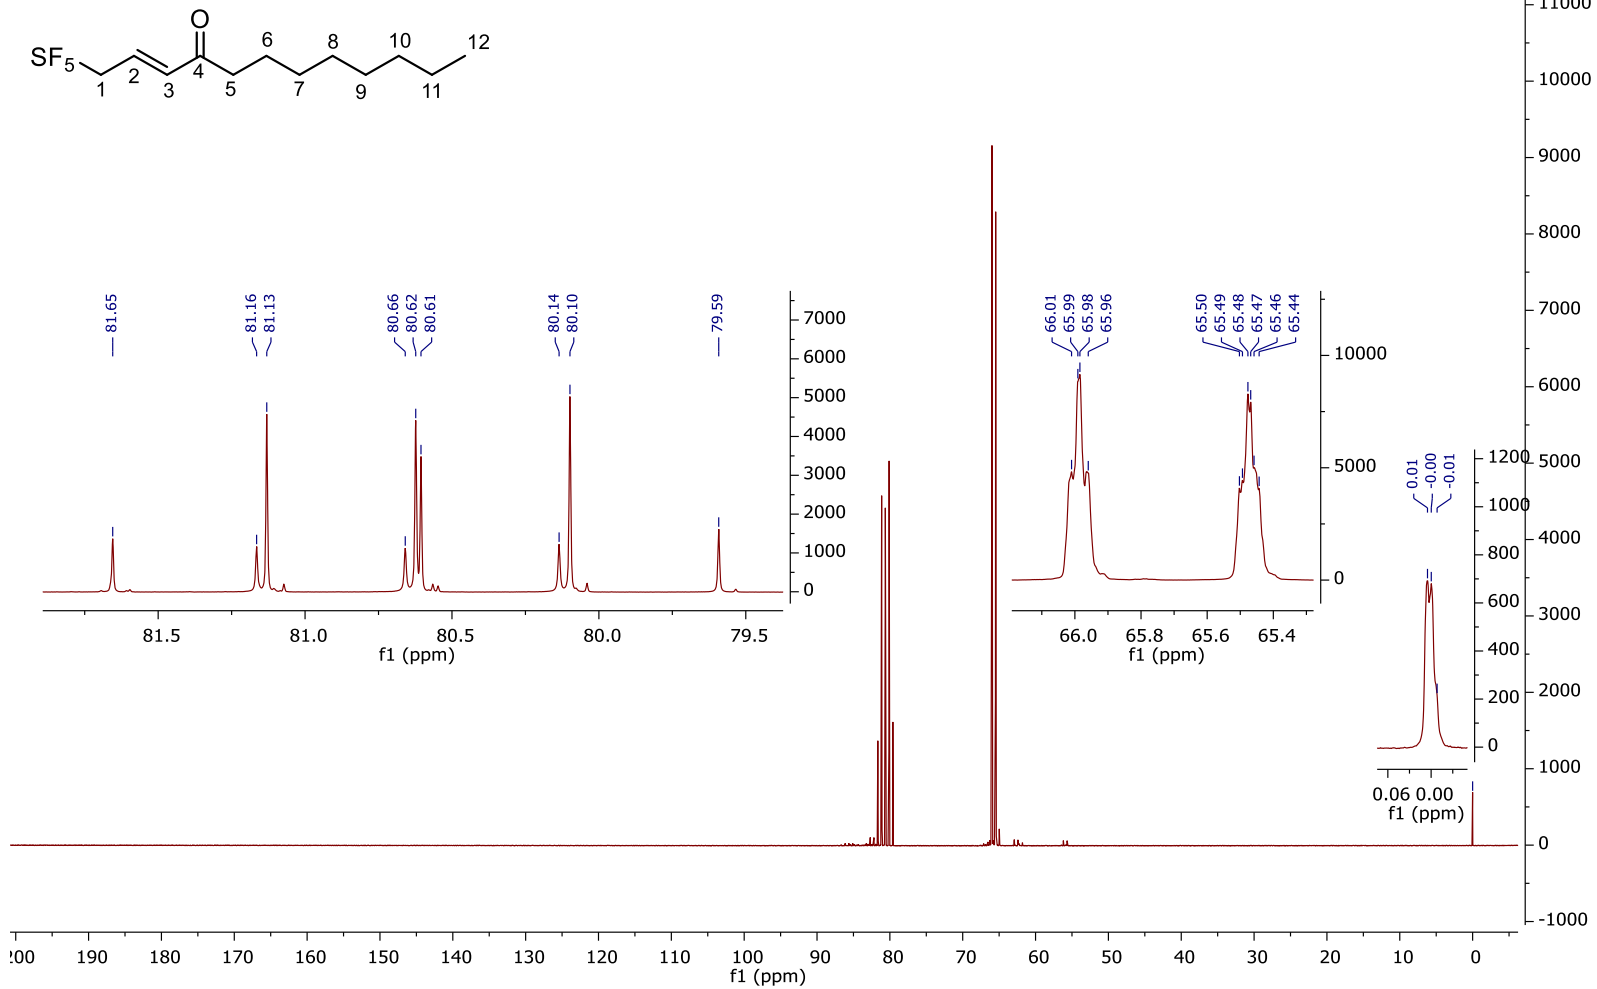

# <sup>1</sup>H NMR spectrum of compound **28b**

Sep04-2015.280.fid  
hau dudzinski pdu 605  
proton CDCl3 /opt/topspin av1 45

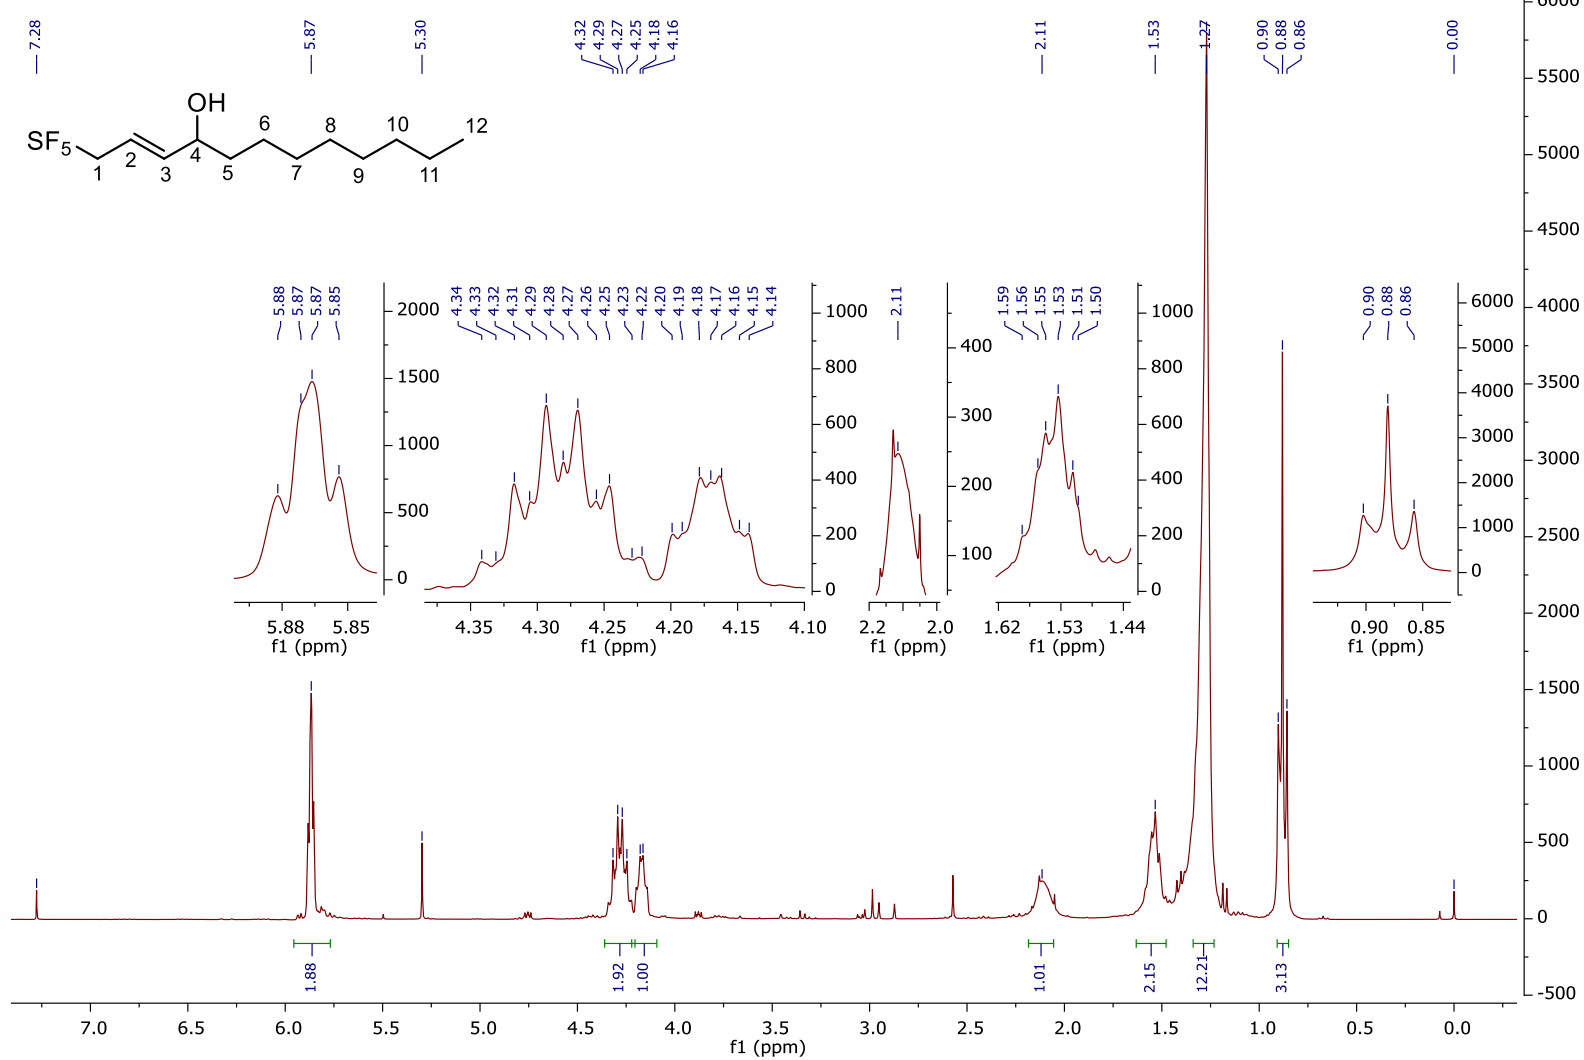

<sup>13</sup>C NMR spectrum of compound **28b**

Sep04-2015.281.fid  
hau dudzinski pdu 605  
carbon CDCl<sub>3</sub> /opt/topspin av1 45

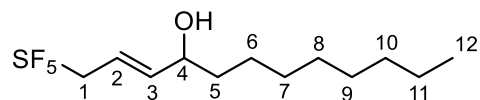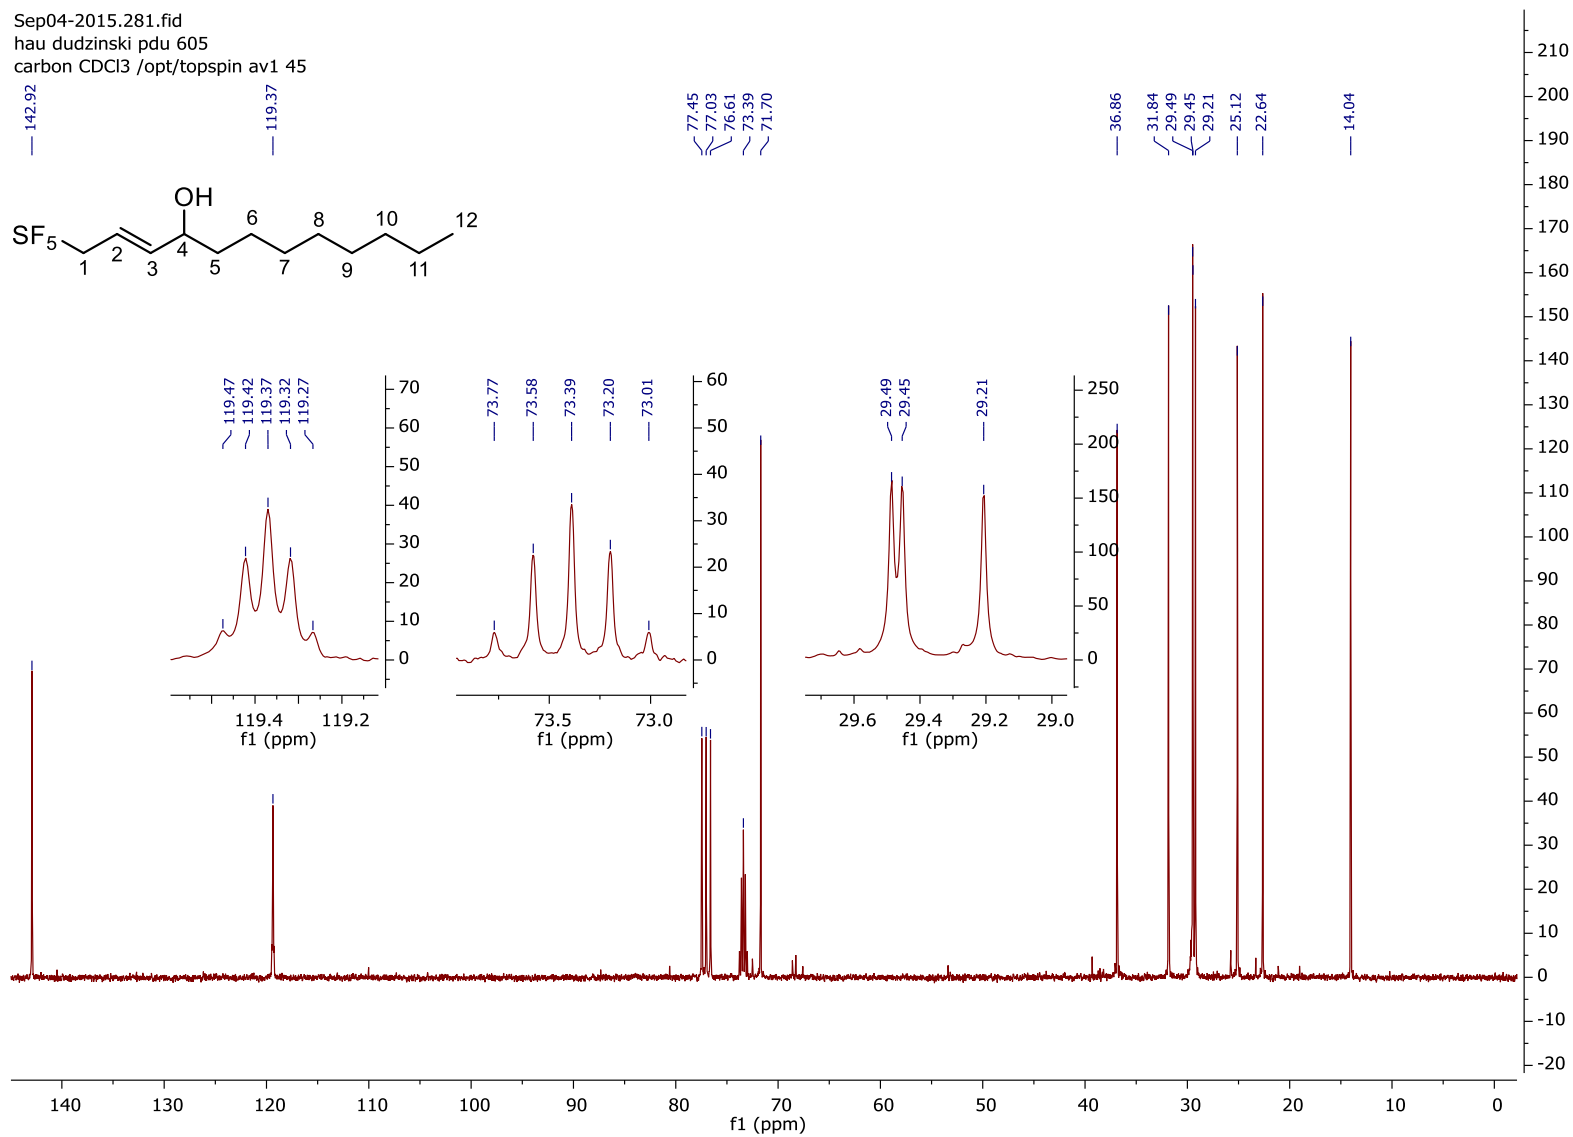



# <sup>19</sup>F NMR spectrum of compound **28b**

Sep04-2015.284.fid  
hau dudzinski pdu 605  
f19\_200\_to\_0 CDCl3 /opt/topspin av1 45

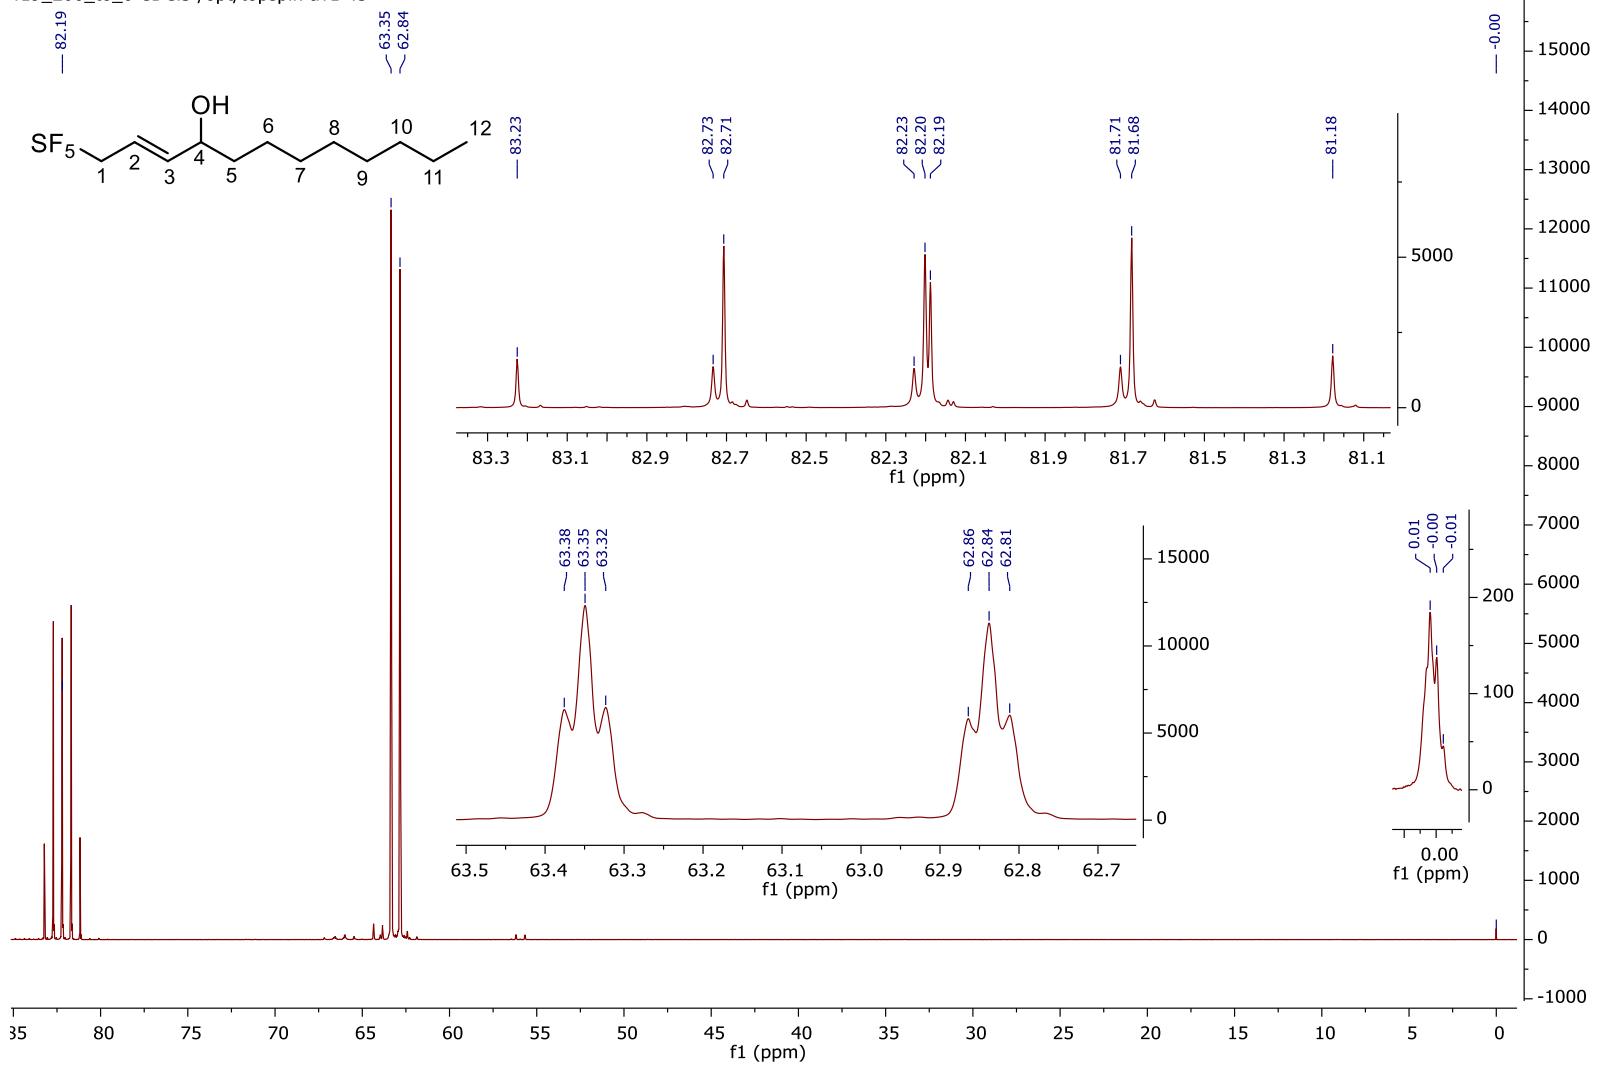

# <sup>1</sup>H NMR spectrum of compound 34a

Aug25-2015.340.fid  
hau dudzinski pdu 597  
proton CDCl3 /opt/topspin av1 34

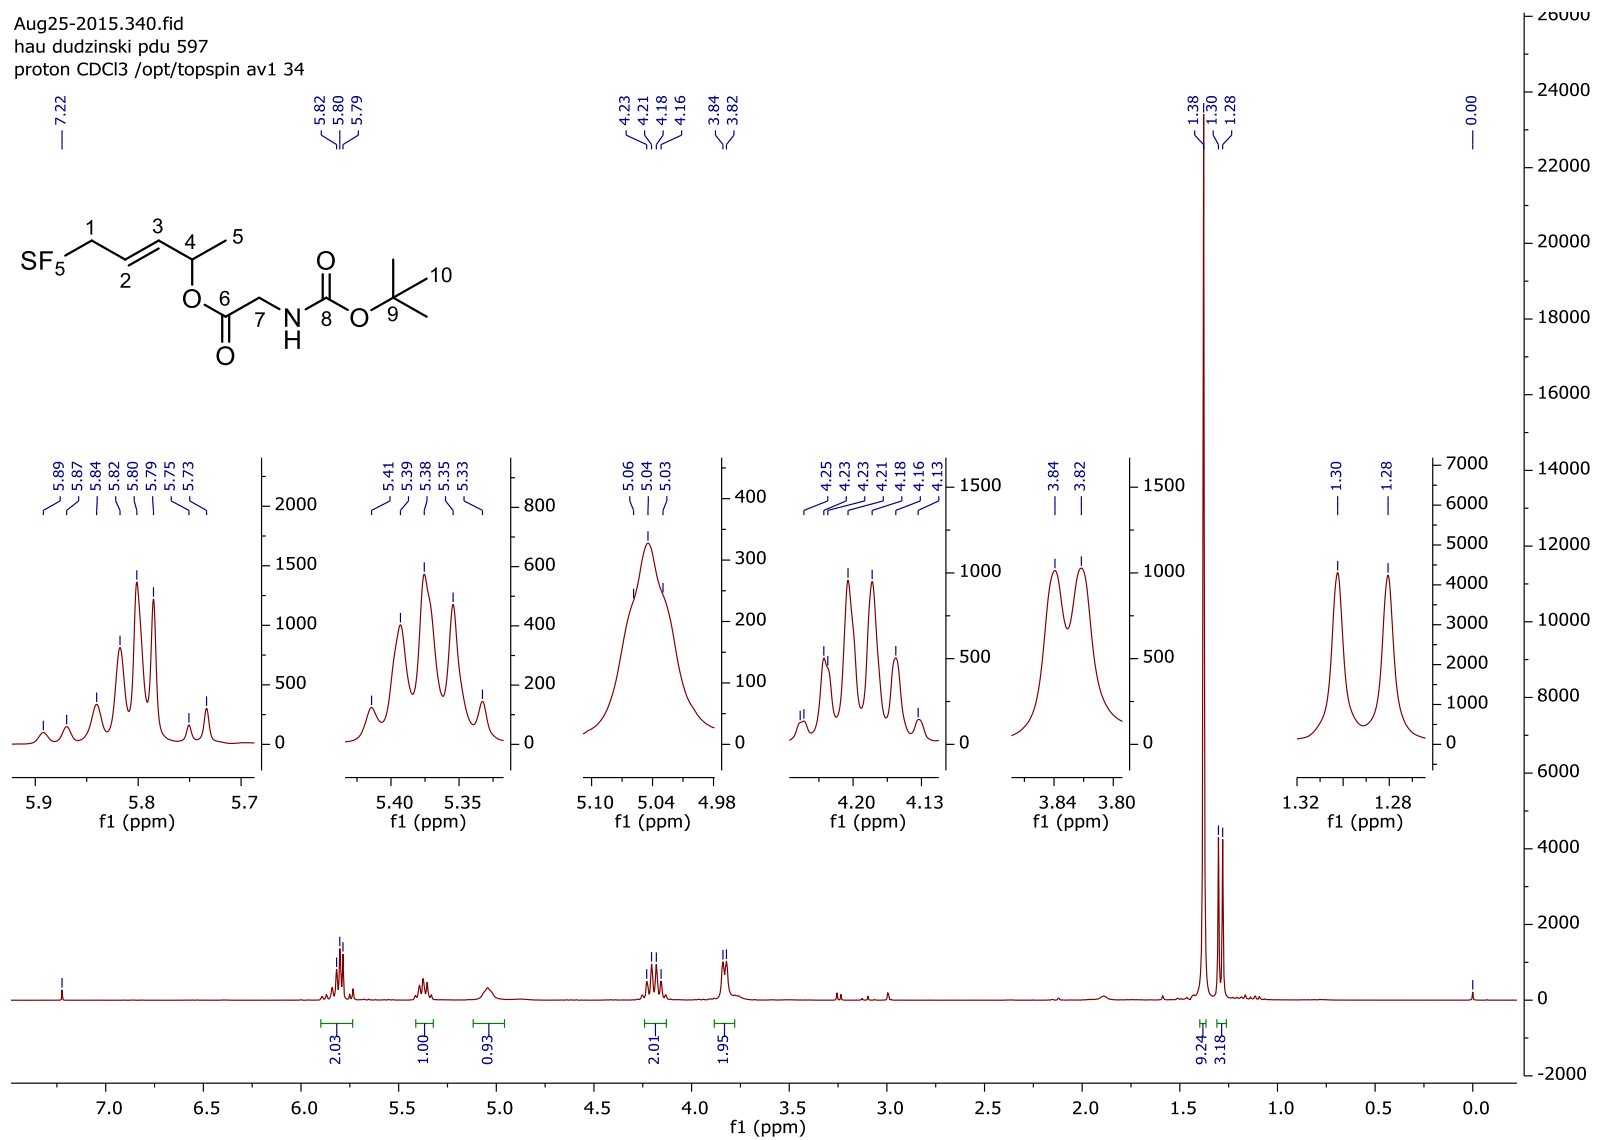

# <sup>13</sup>C NMR spectrum of compound 34a

Aug25-2015.341.fid  
hau dudzinski pdu 597  
carbon CDCl3 /opt/topspin av1 34

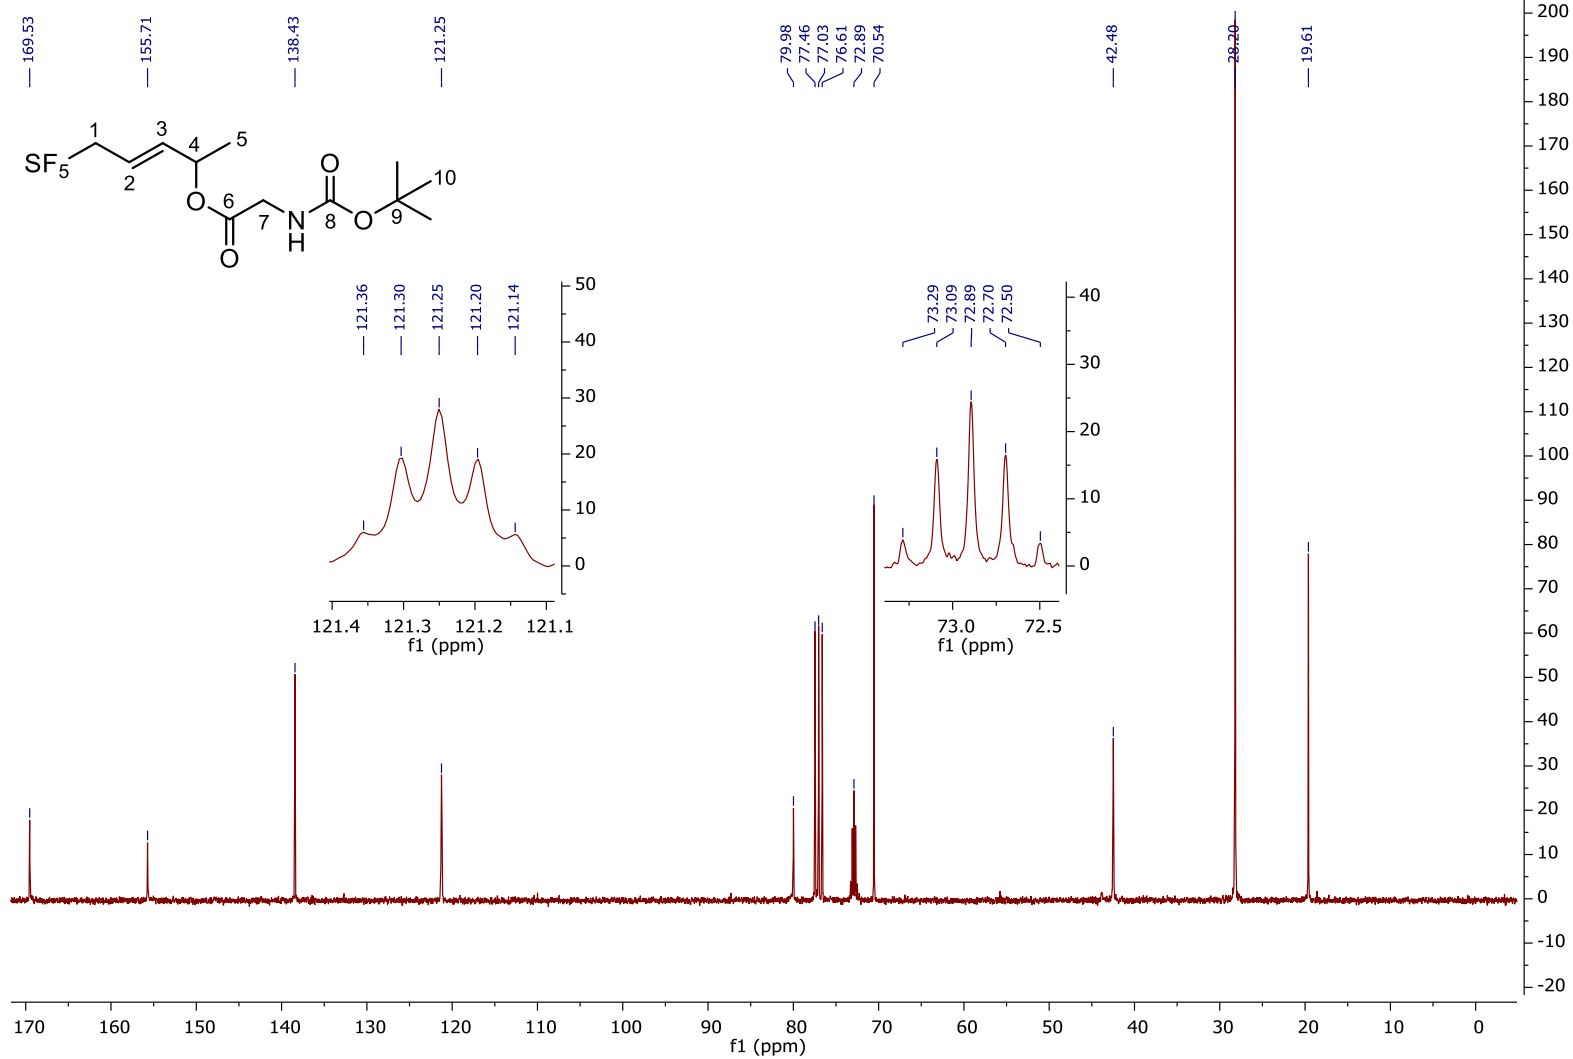

# <sup>19</sup>F NMR spectrum of compound 34a

Aug25-2015.344.fid  
hau dudzinski pdu 597  
f19\_200\_to\_0 CDCl3 /opt/topspin av1 34

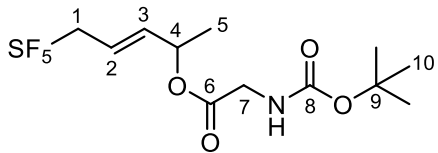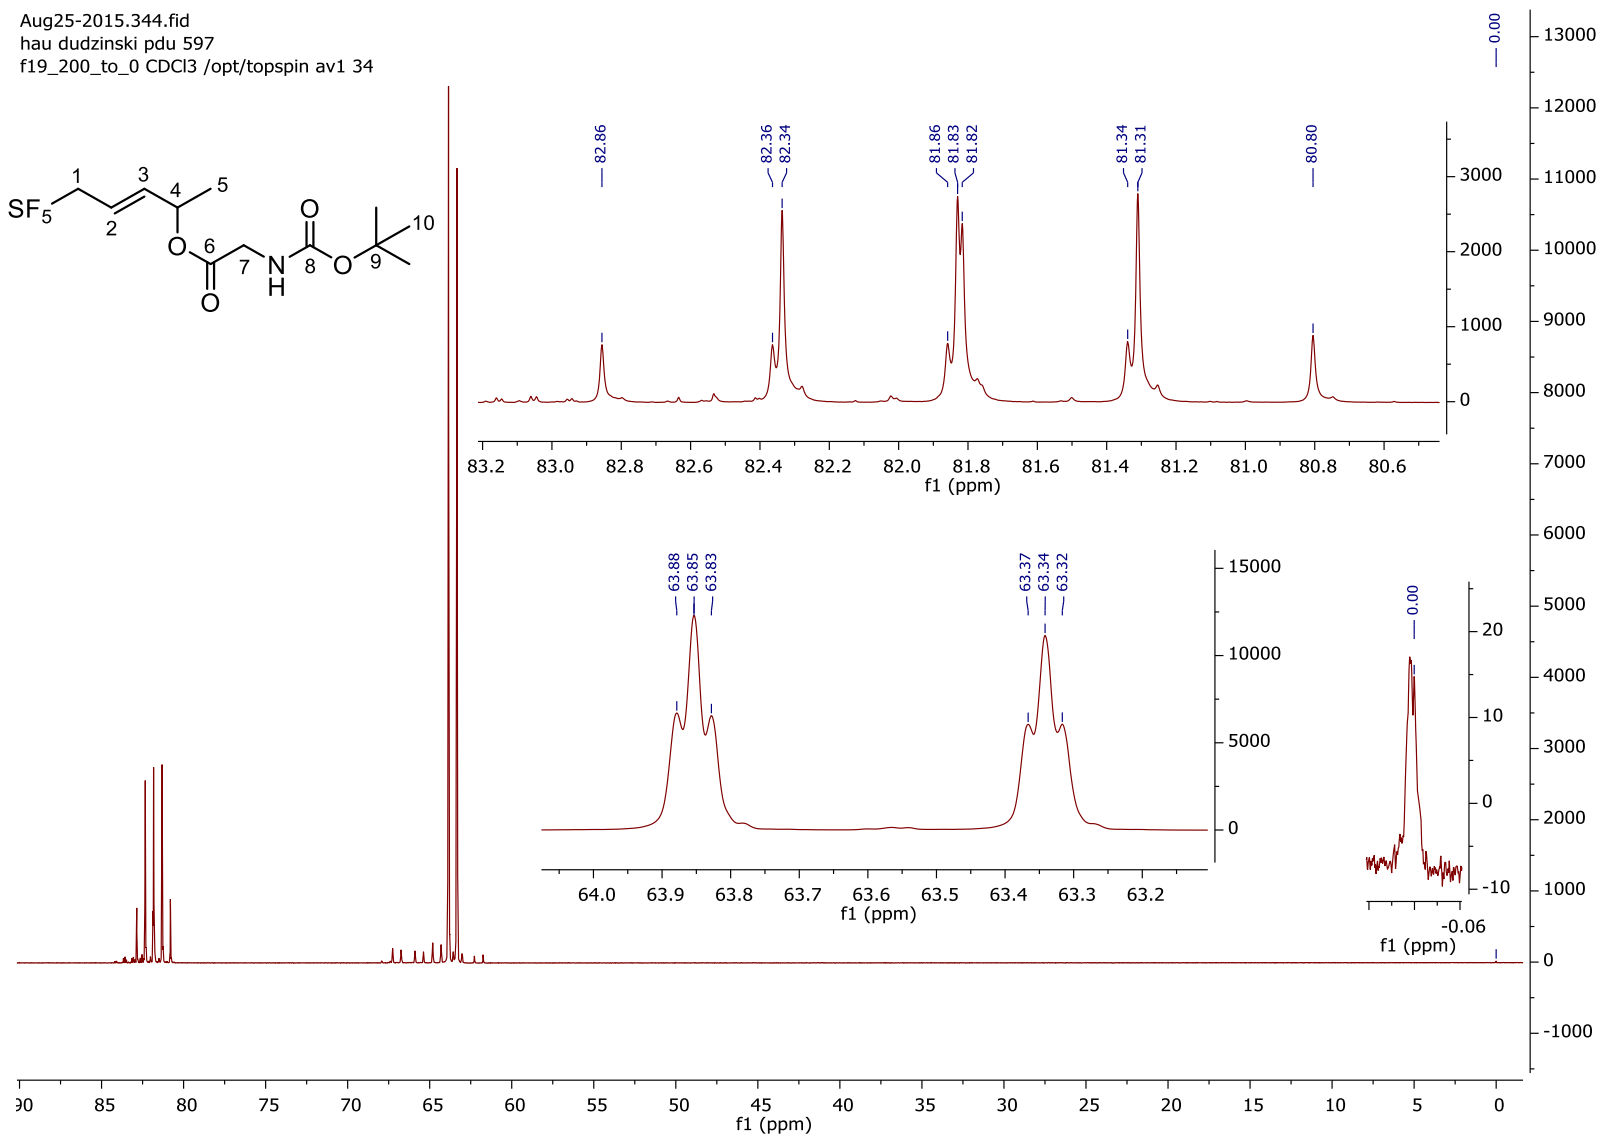

# <sup>1</sup>H NMR spectrum of compound **34b**

Sep08-2015.510.fid  
hau dudzinski pdu 607  
proton CDCl3 /opt/topspin av1 12

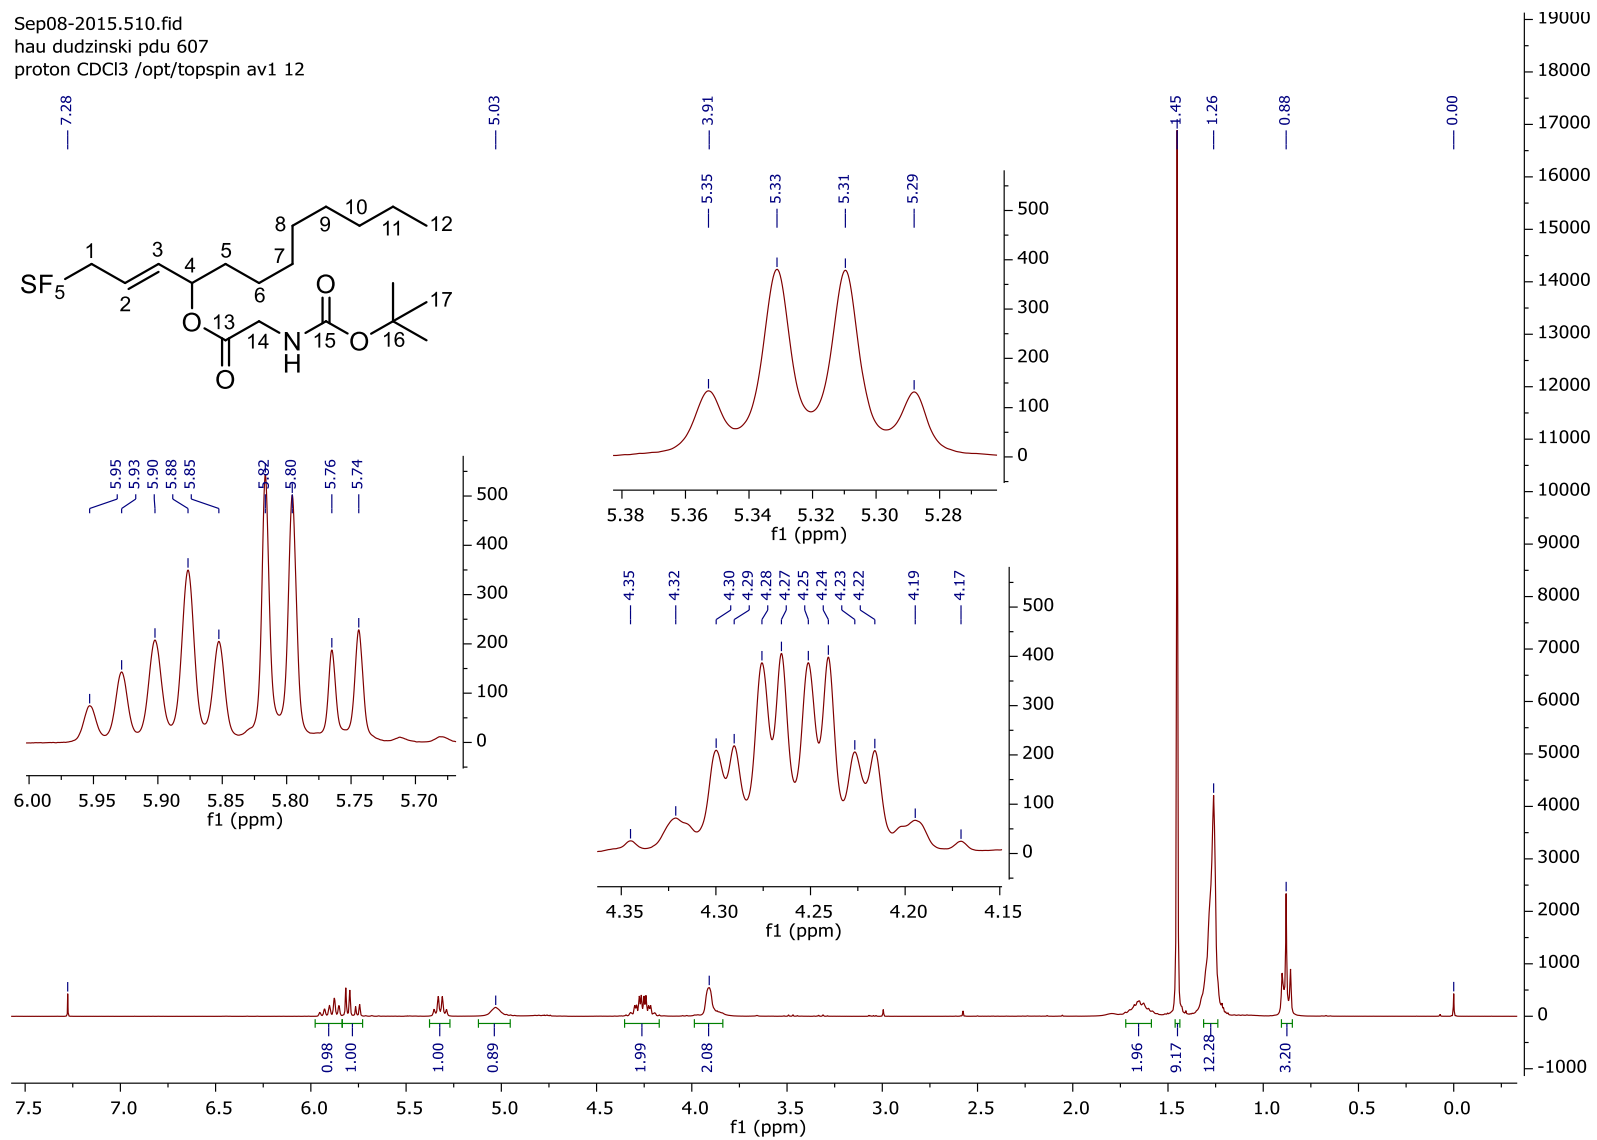

# <sup>13</sup>C NMR spectrum of compound **34b**

Sep08-2015.511.fid  
hau dudzinski pdu 607  
carbon CDCl<sub>3</sub> /opt/topspin av1 12

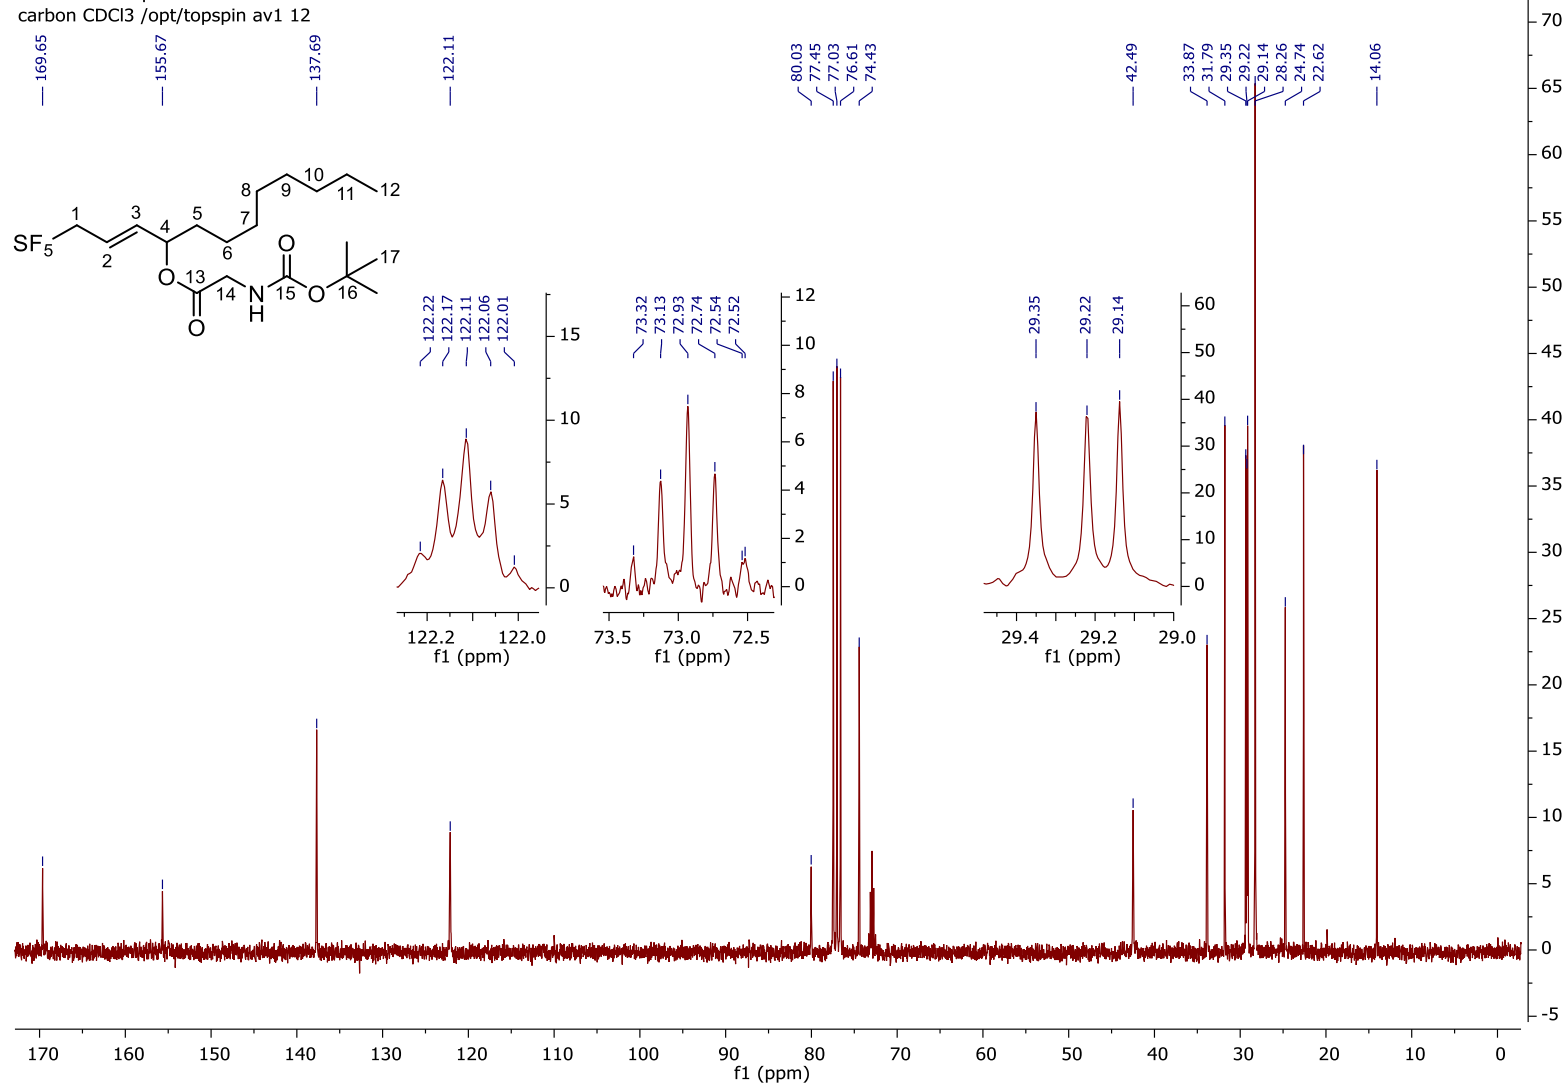

# <sup>19</sup>F NMR spectrum of compound **34b**

Sep08-2015.514.fid  
hau dudzinski pdu 607  
f19\_200\_to\_0 CDCl3 /opt/topspin av1 12

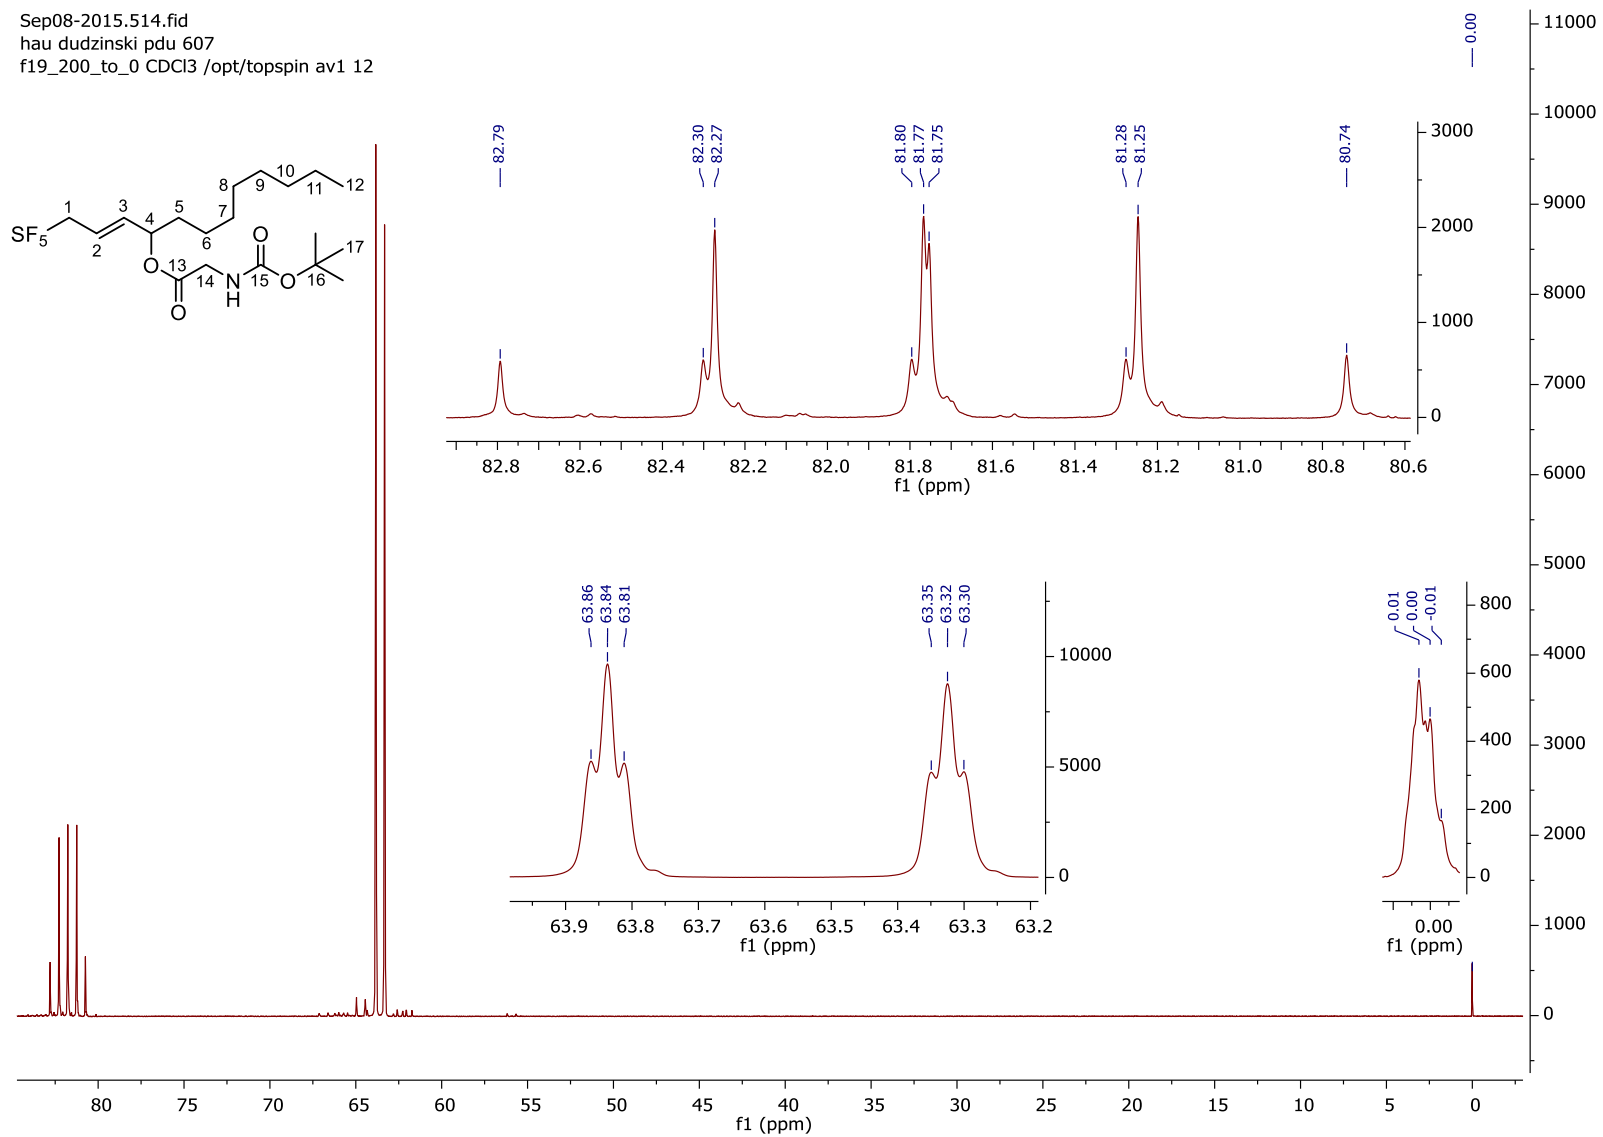

<sup>1</sup>H NMR spectrum of compound **36a**

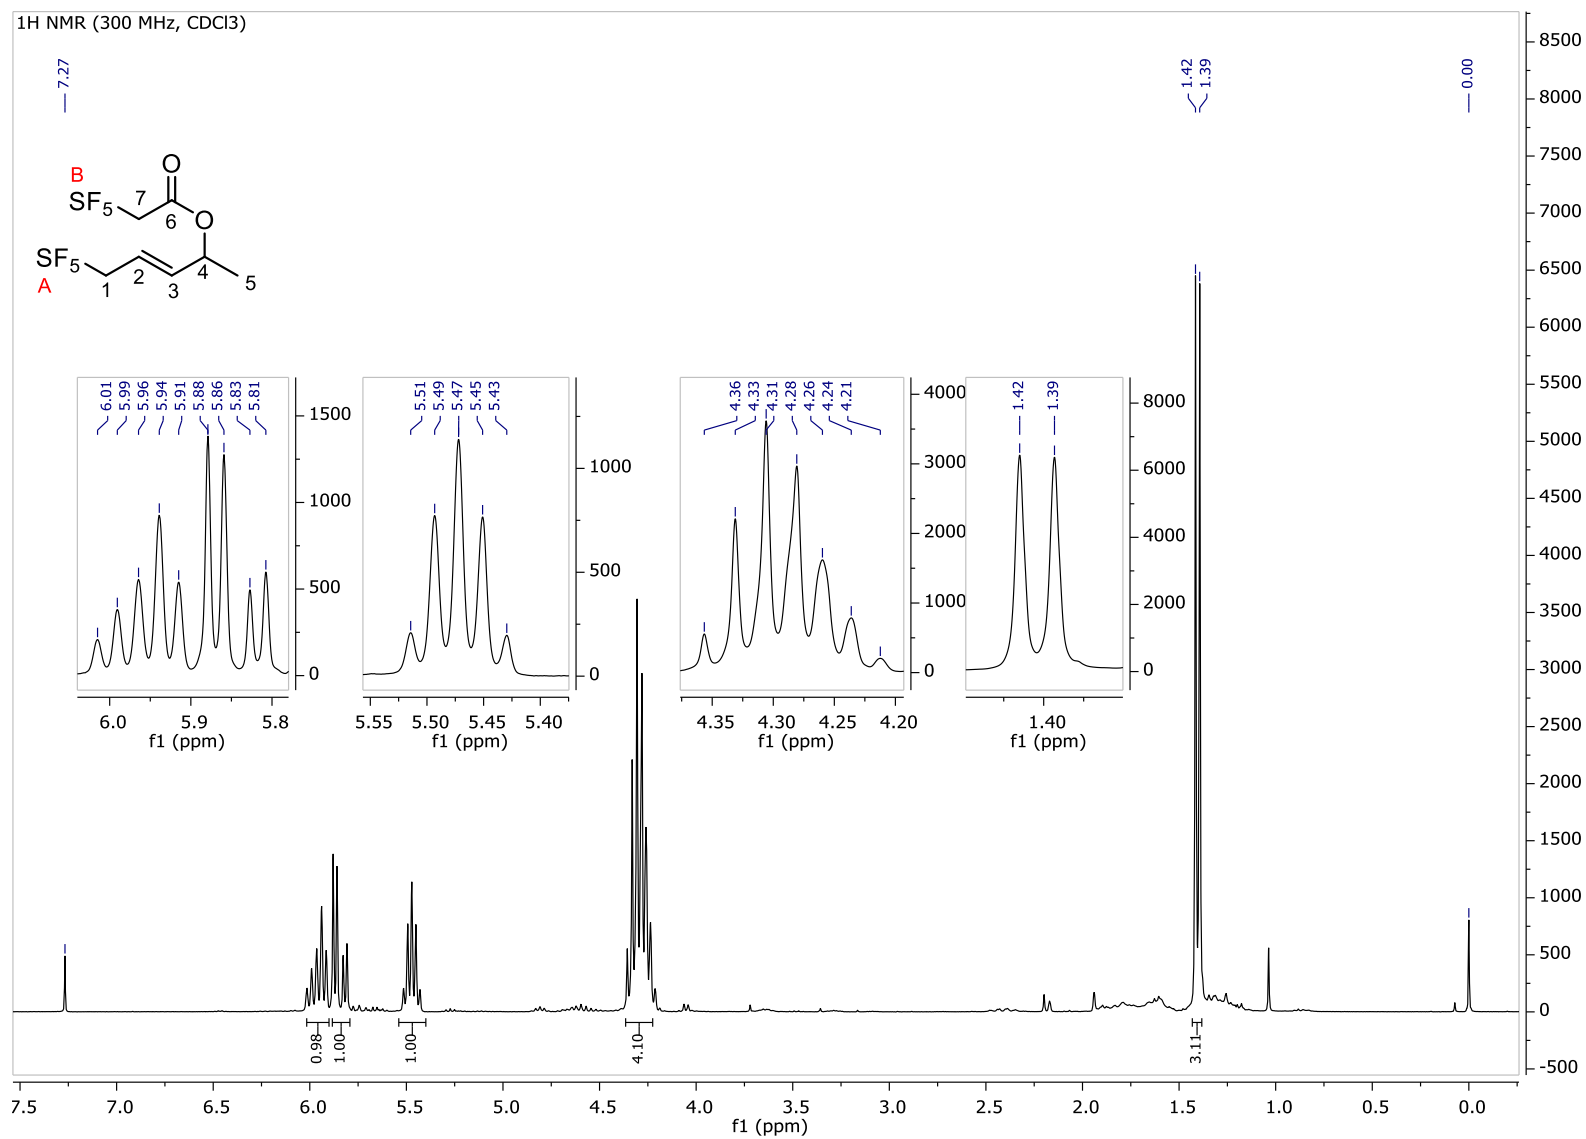



# <sup>13</sup>C NMR spectrum of compound 36a

Jan13-2017.231.fid  
hau dudzinski pdu 765  
carbon CDCl<sub>3</sub> /opt/topspin av1 10

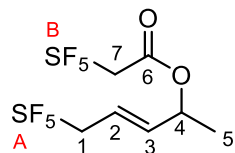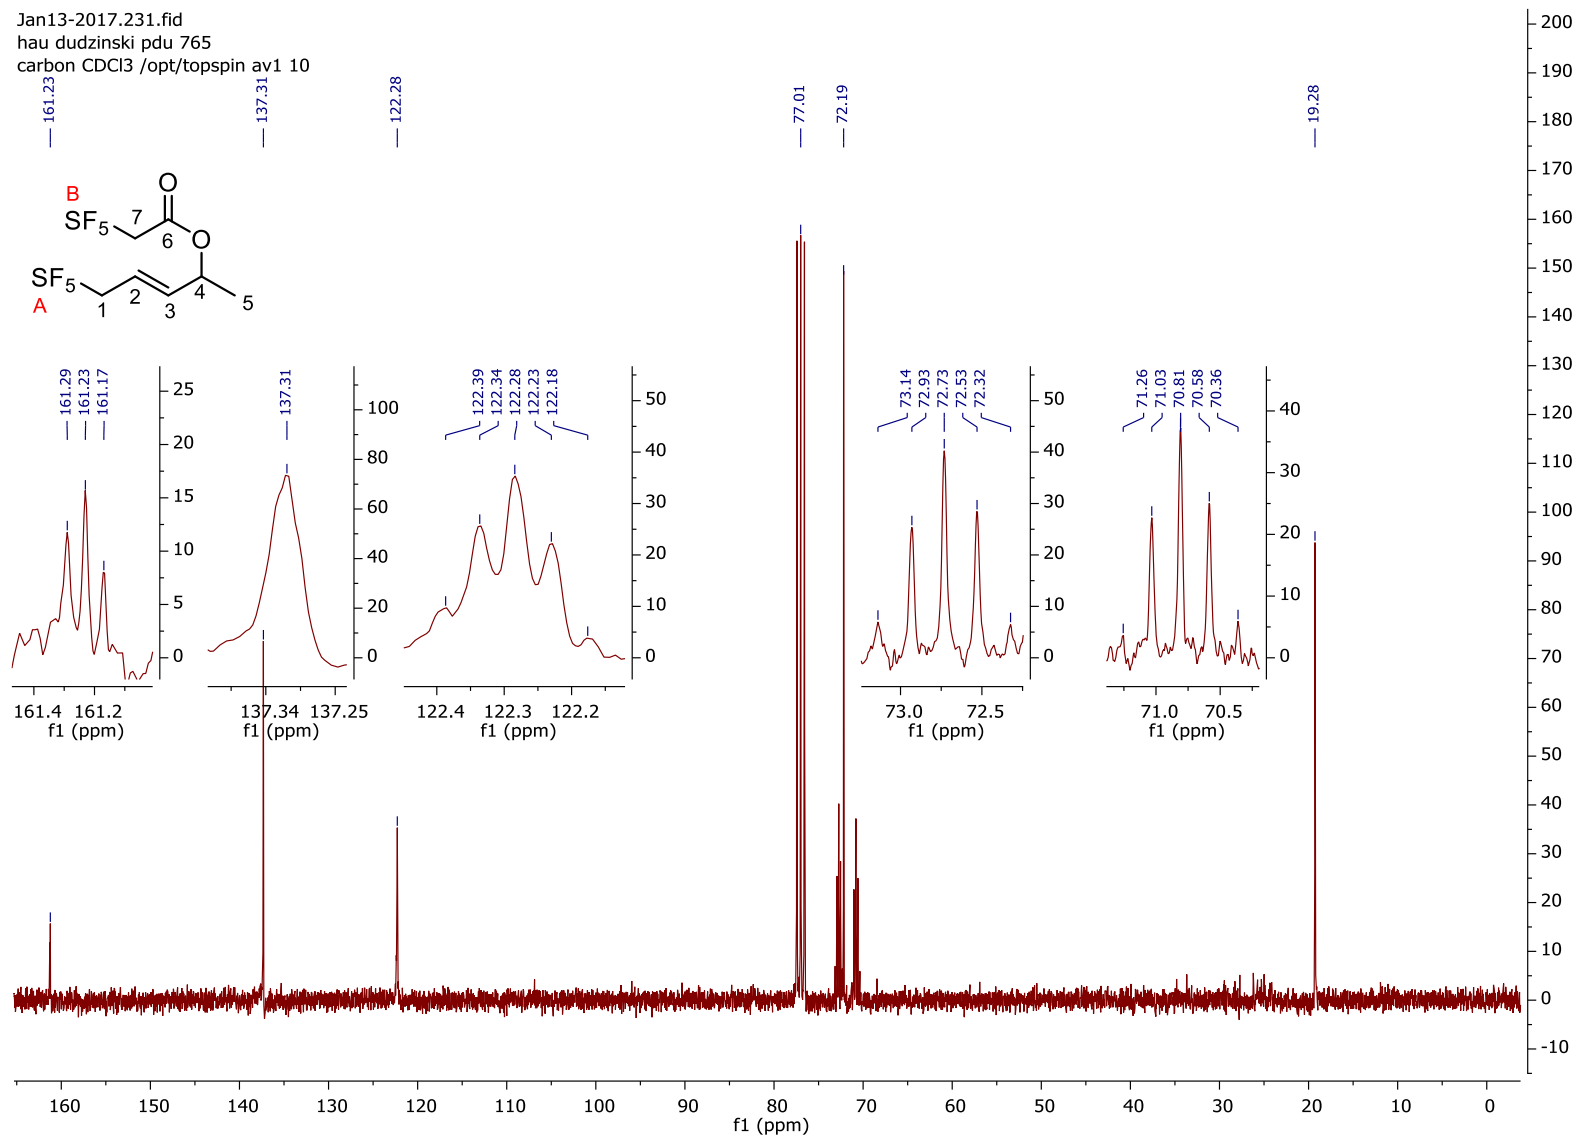

# <sup>19</sup>F NMR spectrum of compound 36a

Jan13-2017.234.fid  
hau dudzinski pdu 765  
f19\_200\_to\_0 CDCl3 /opt/topspin av1 10

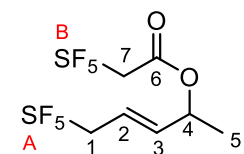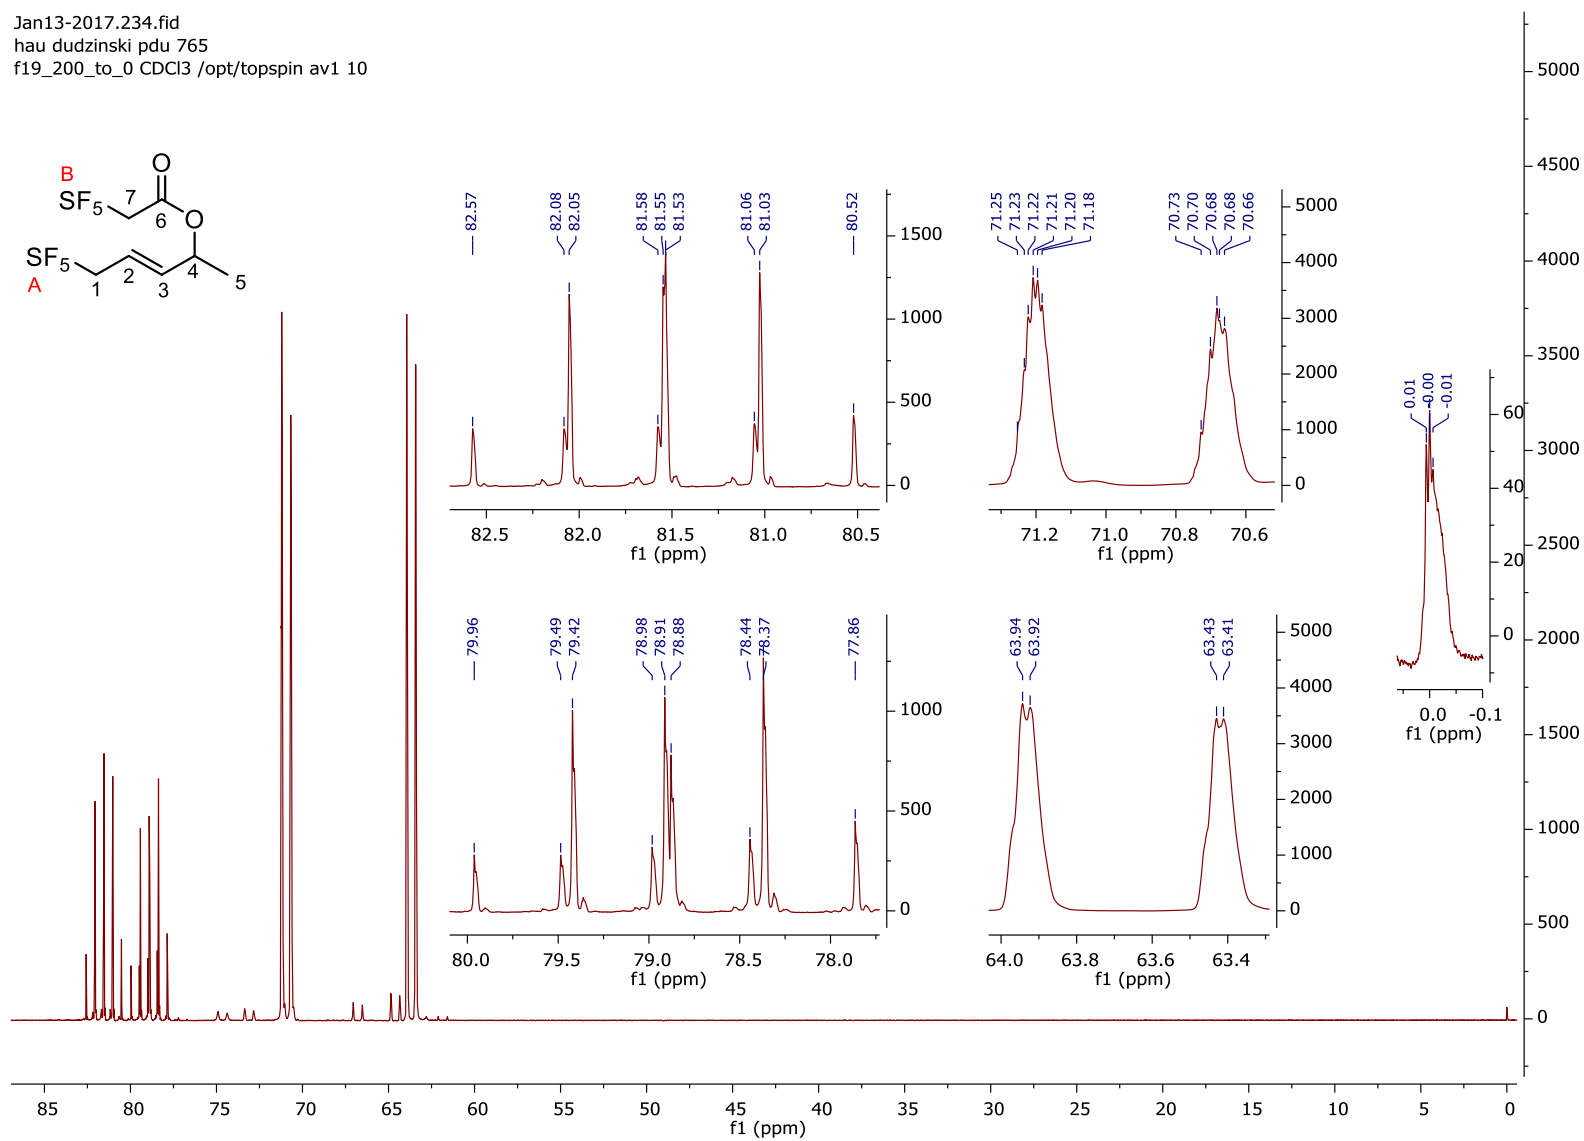

# <sup>1</sup>H NMR spectrum of compound 36b

Sep18-2015.140.fid  
hau dudzinski pdu 609  
proton CDCl3 /opt/topspin av1 43

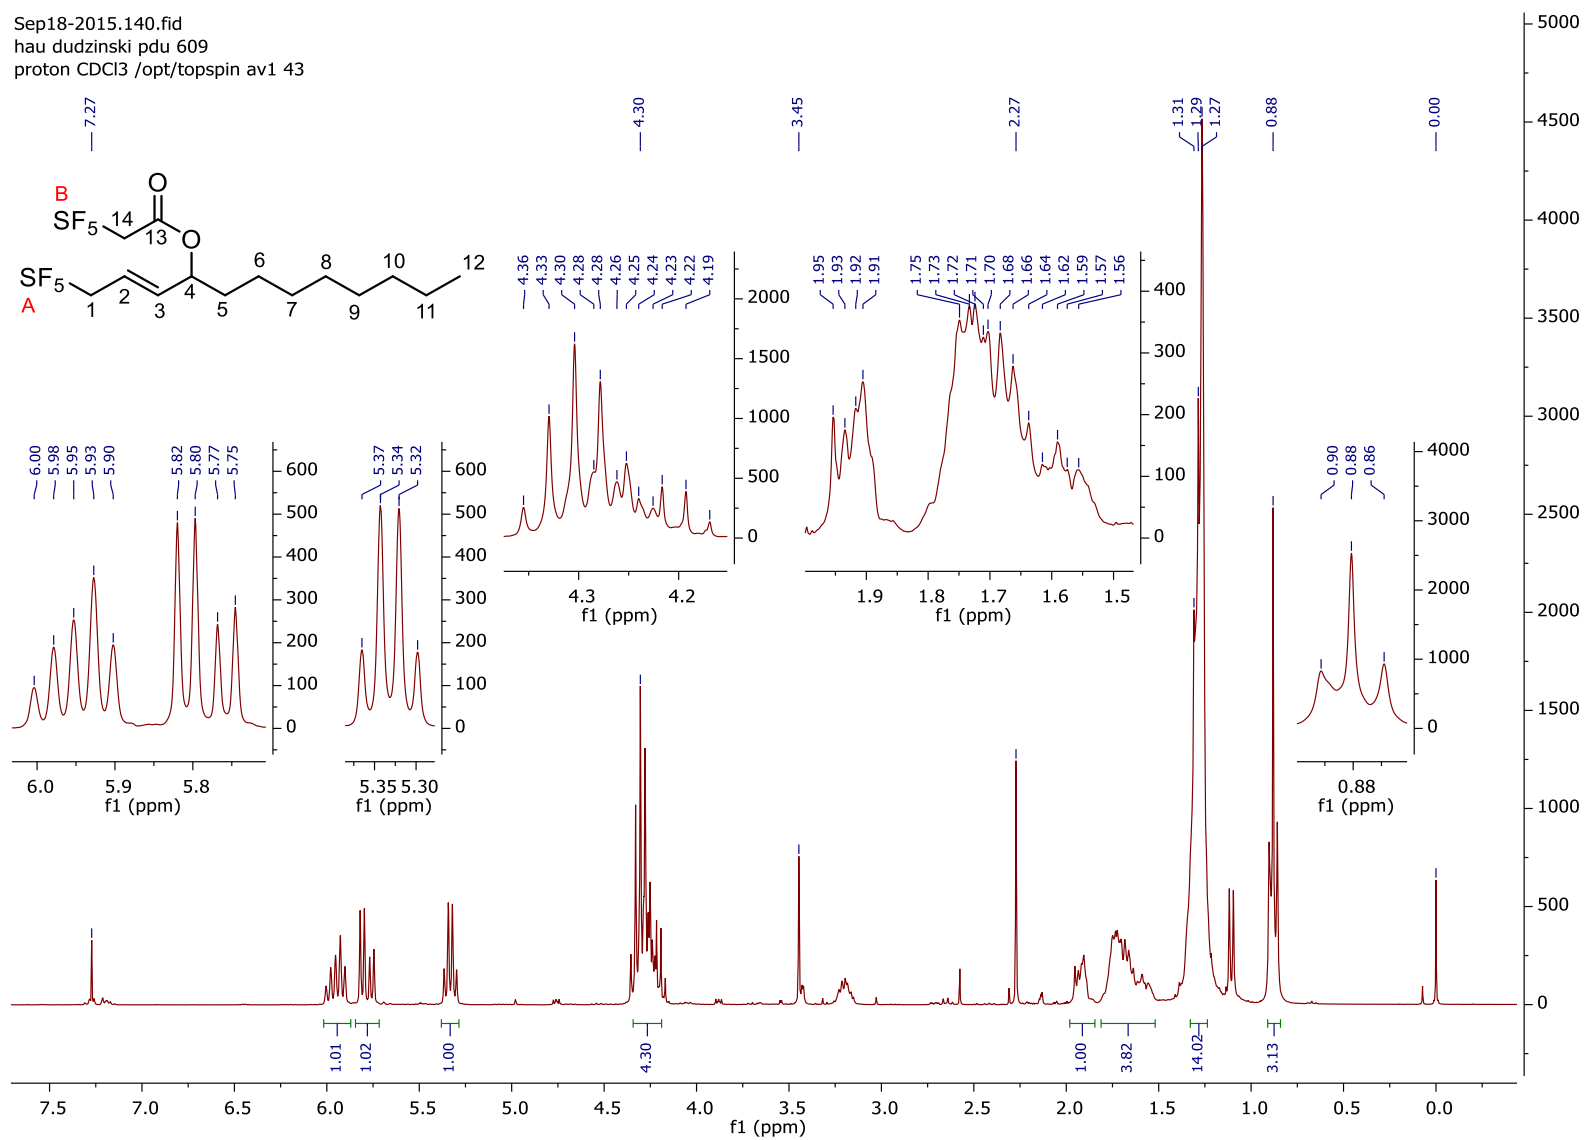

# <sup>13</sup>C NMR spectrum of compound 36b

Sep18-2015.141.fid  
hau dudzinski pdu 609  
carbon CDCl3 /opt/topspin av1 43

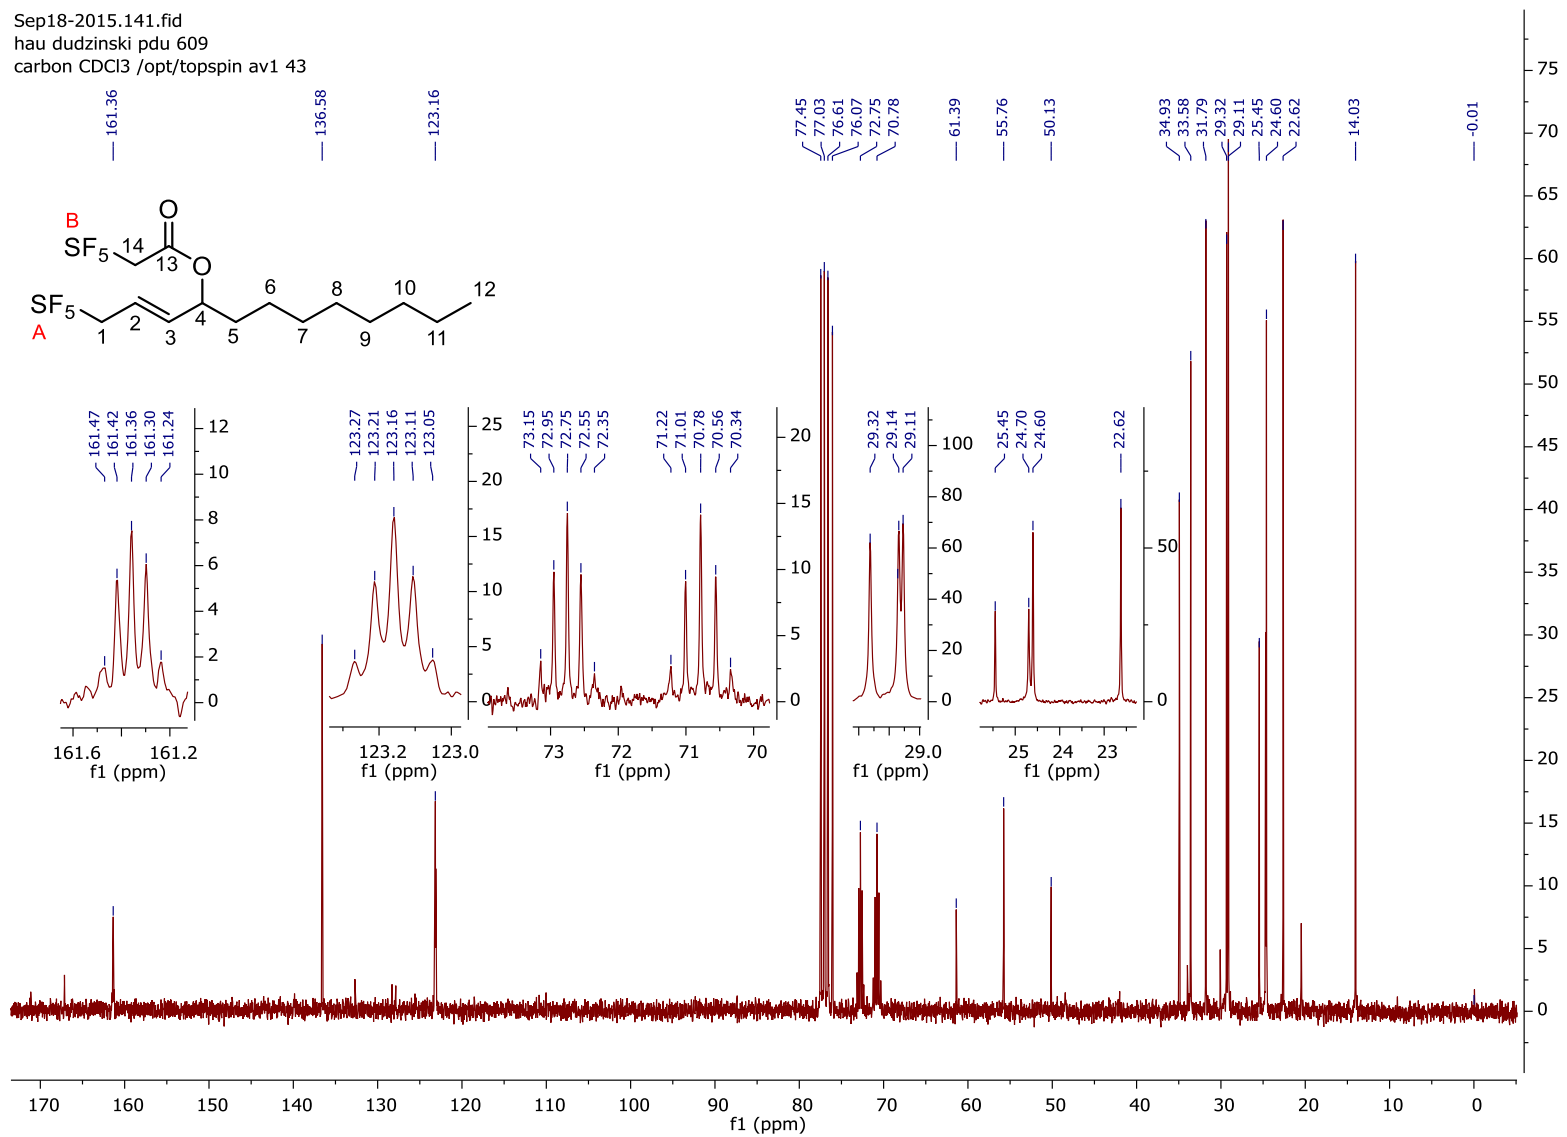

<sup>19</sup>F NMR spectrum of compound **36b**

Sep18-2015.144.fid  
hau dudzinski pdu 609  
f19\_200\_to\_0 CDCI3 /opt/topspin av1 43

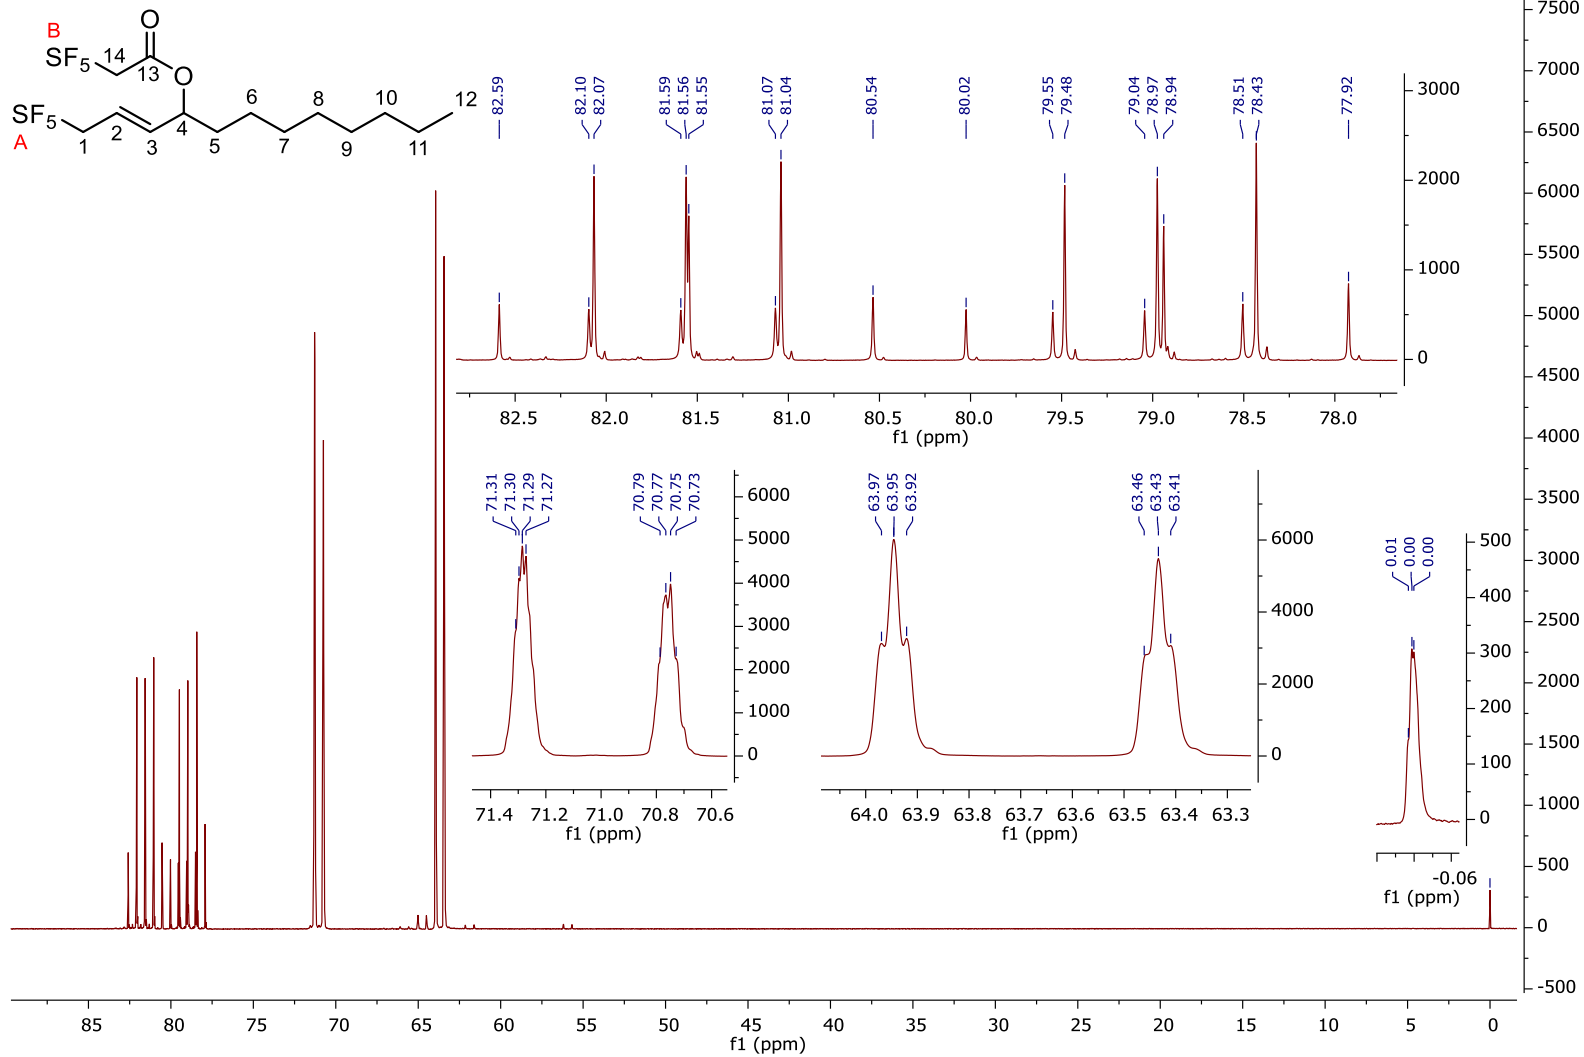

<sup>1</sup>H NMR spectrum of compound **38**

May31-2017.780.fid  
hau dudzinski pdu 809  
proton CDCl3 /opt/topspin av1 55

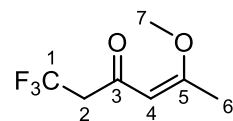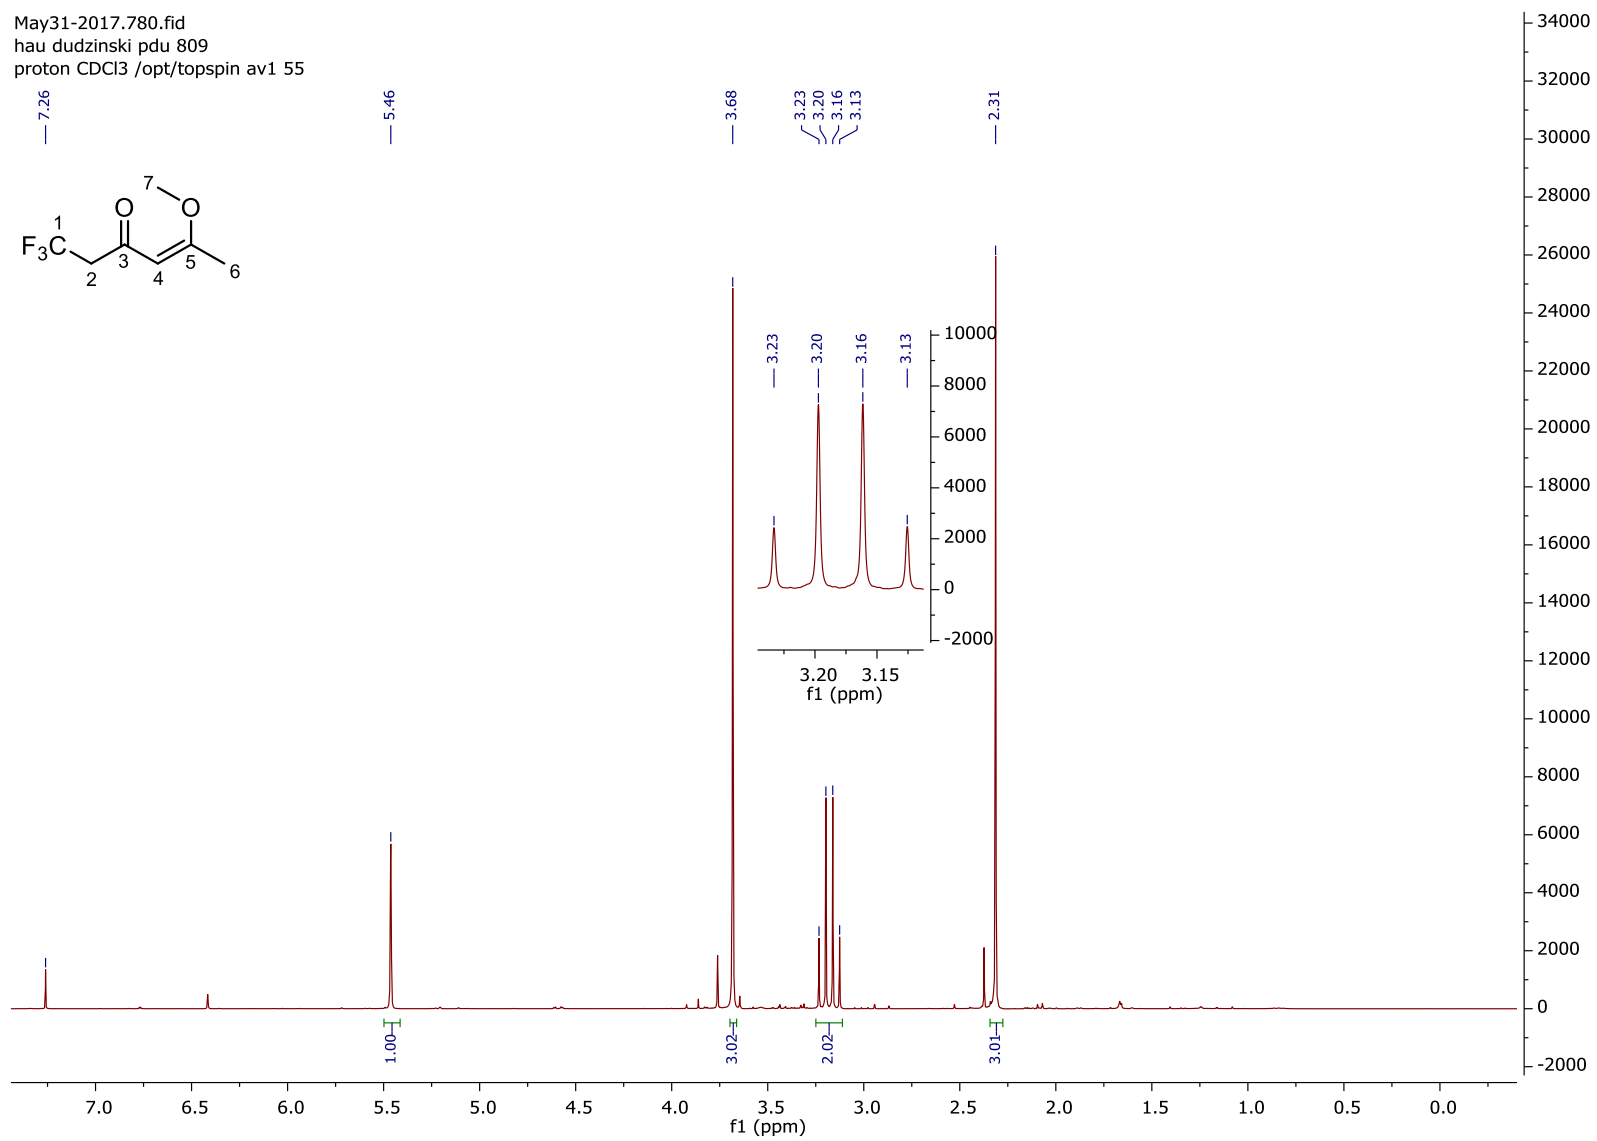

<sup>13</sup>C NMR spectrum of compound **38**

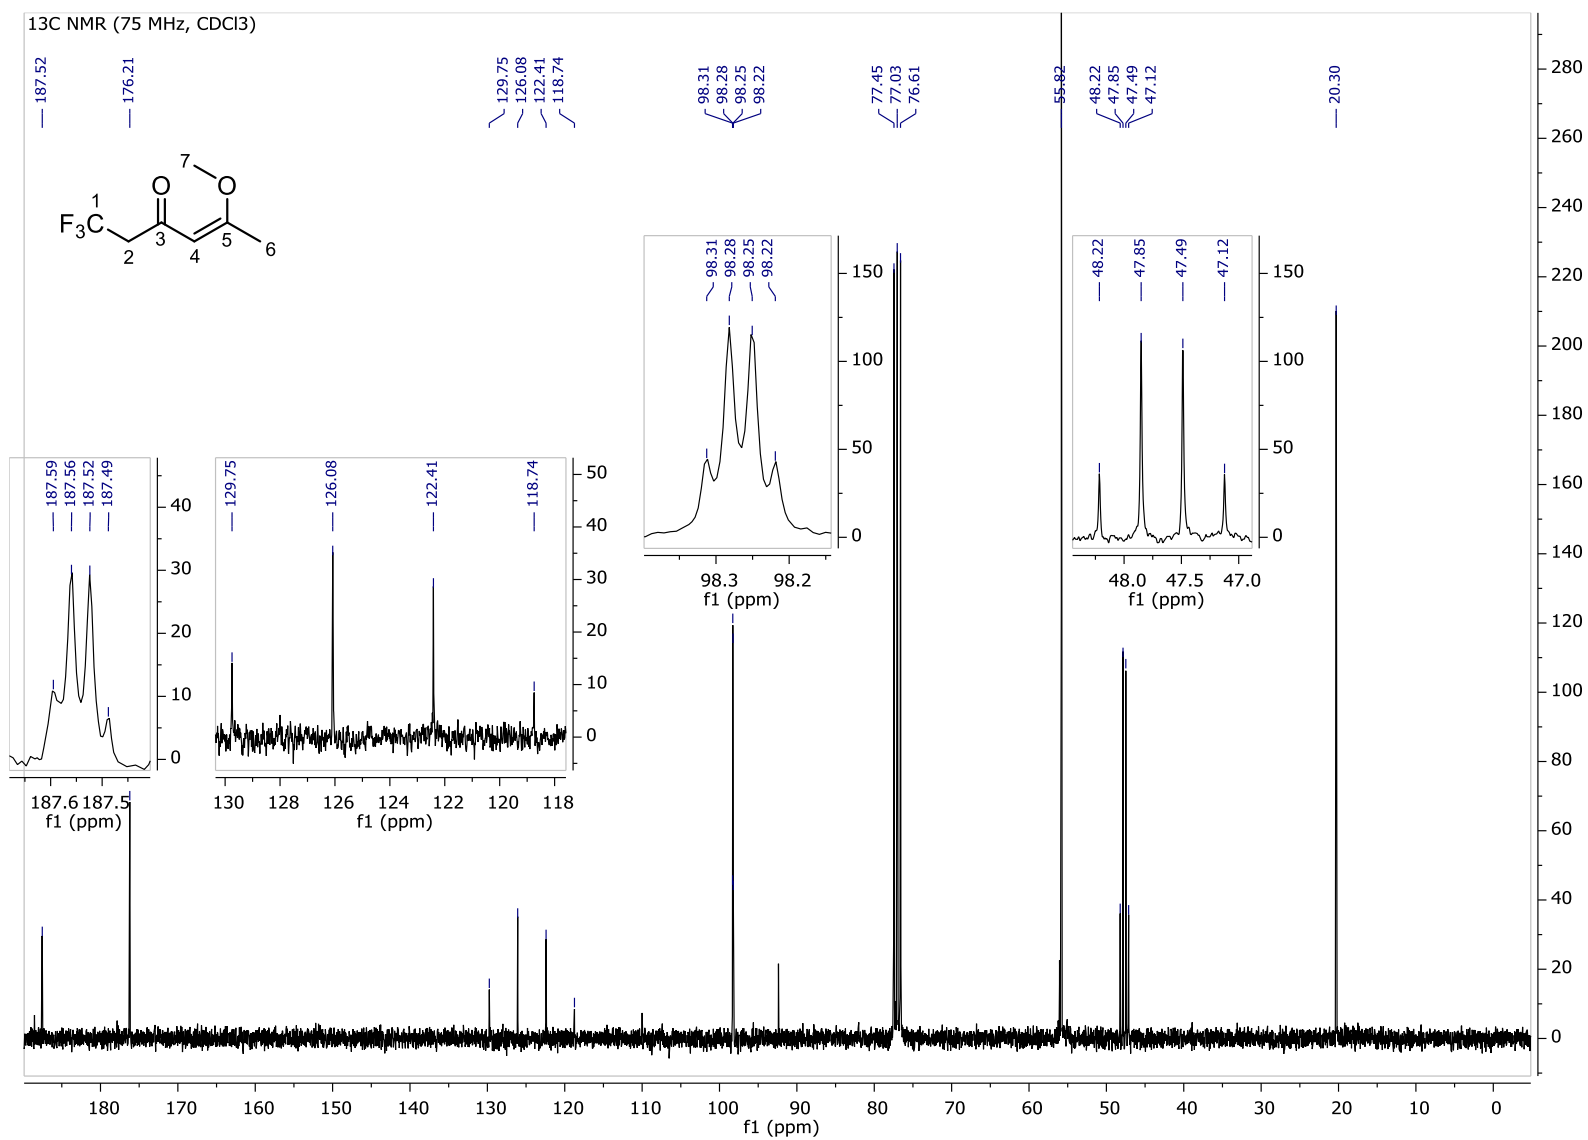

# <sup>19</sup>F NMR spectrum of compound **38**

May31-2017.783.fid  
hau dudzinski pdu 809  
f19cpd CDCl3 /opt/topspin av1 55

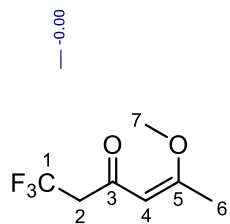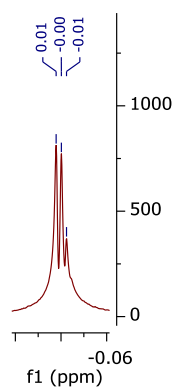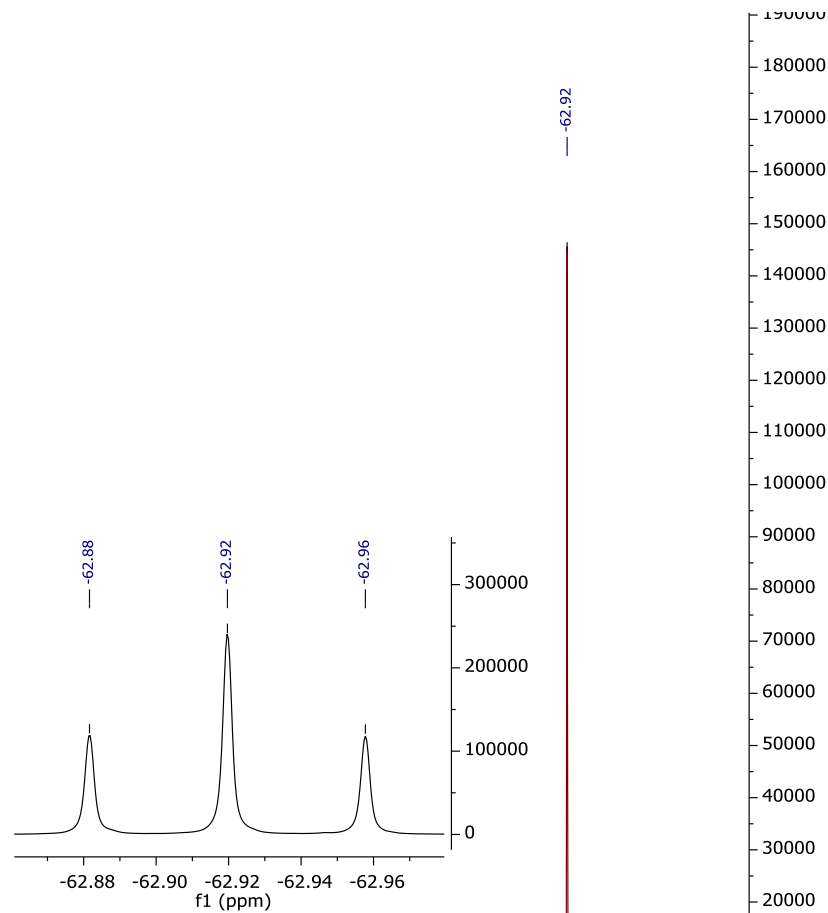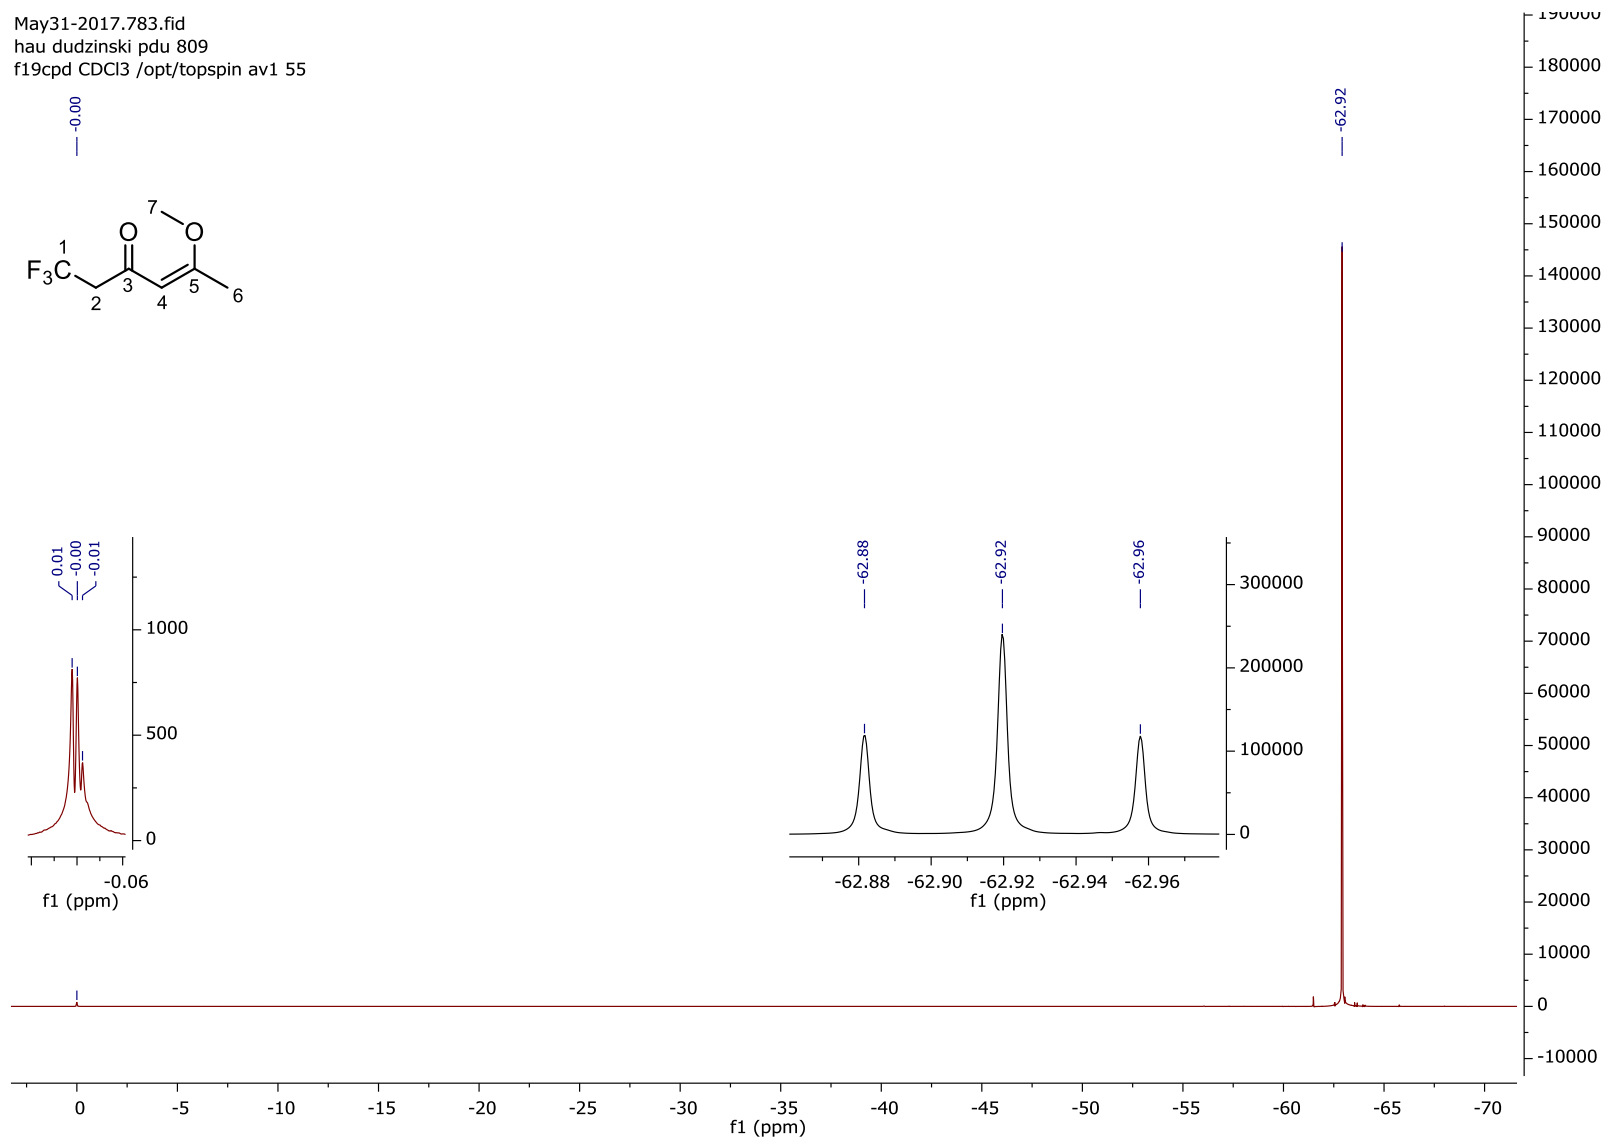



<sup>1</sup>H NMR spectrum of (*E*)-6,6,6-trifluorohex-3-en-2-ol (**42**)

Jun16-2017.570.fid  
hau dudzinski pdu 811  
proton CDCl<sub>3</sub> /opt/topspin av1 53

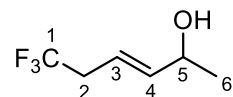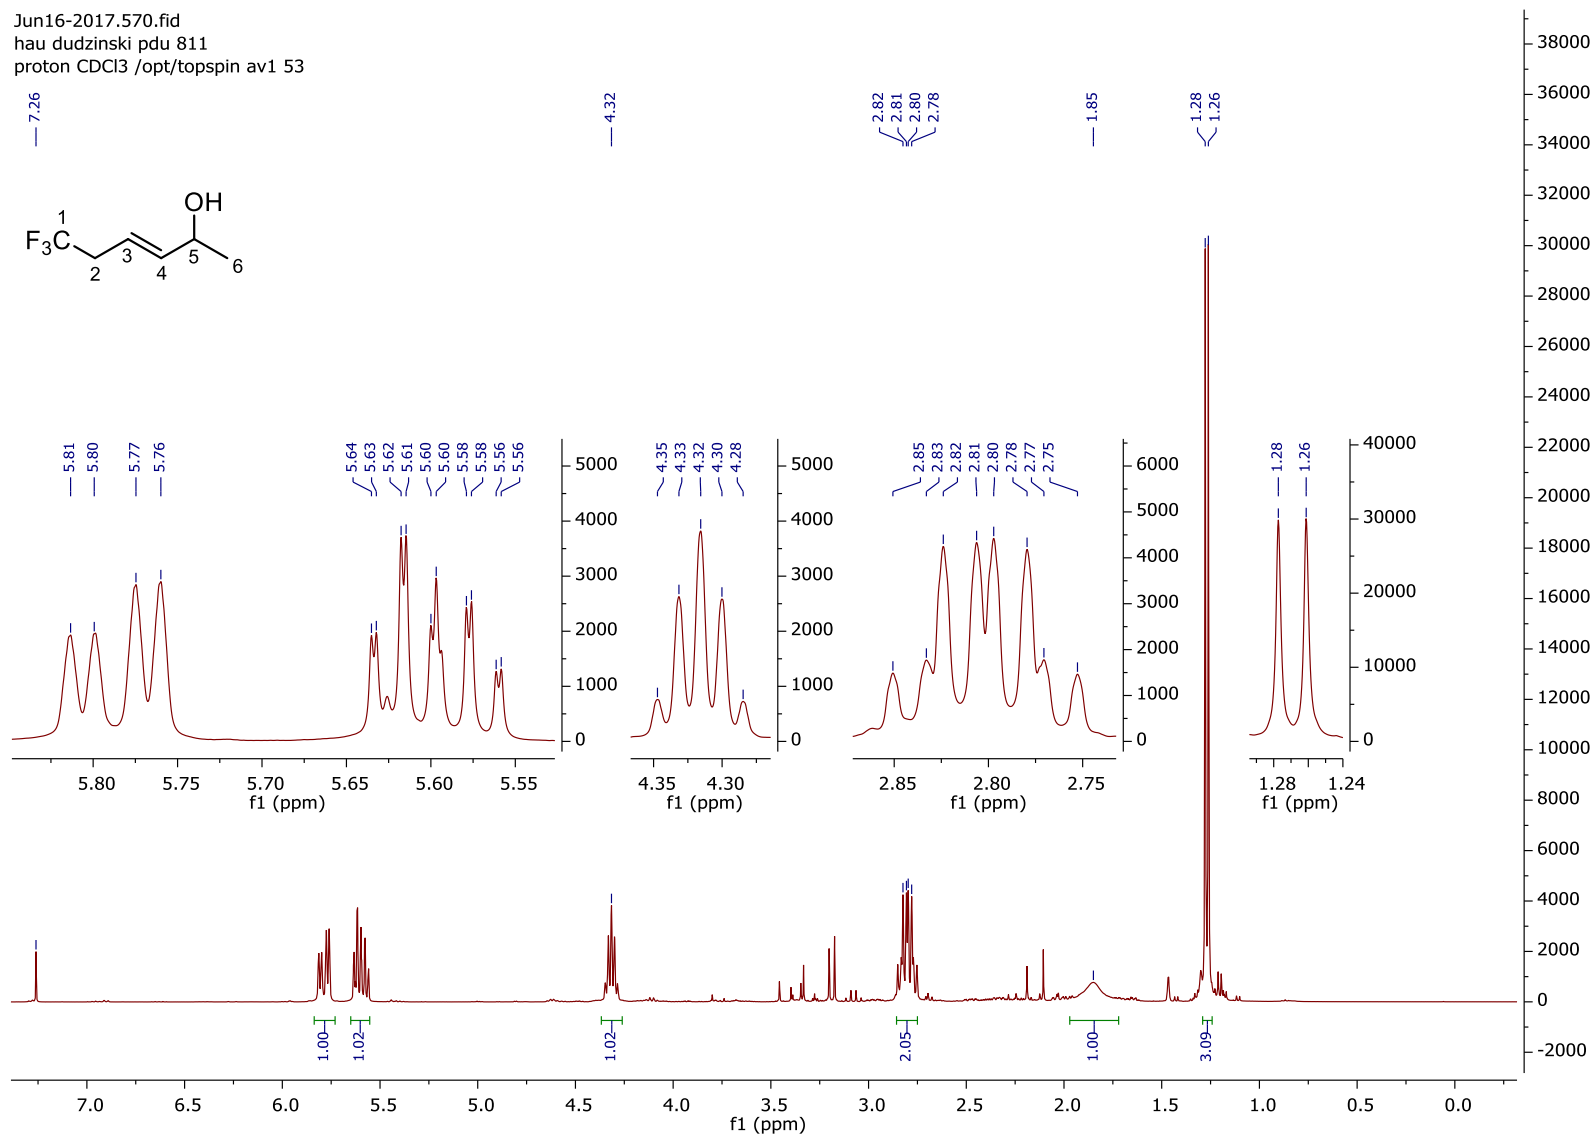

<sup>13</sup>C NMR spectrum of (*E*)-6,6,6-trifluorohex-3-en-2-ol (**42**)

Jun16-2017.571.fid  
hau dudzinski pdu 811  
carbon CDCl<sub>3</sub> /opt/topspin av1.53

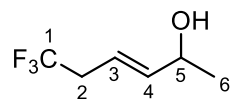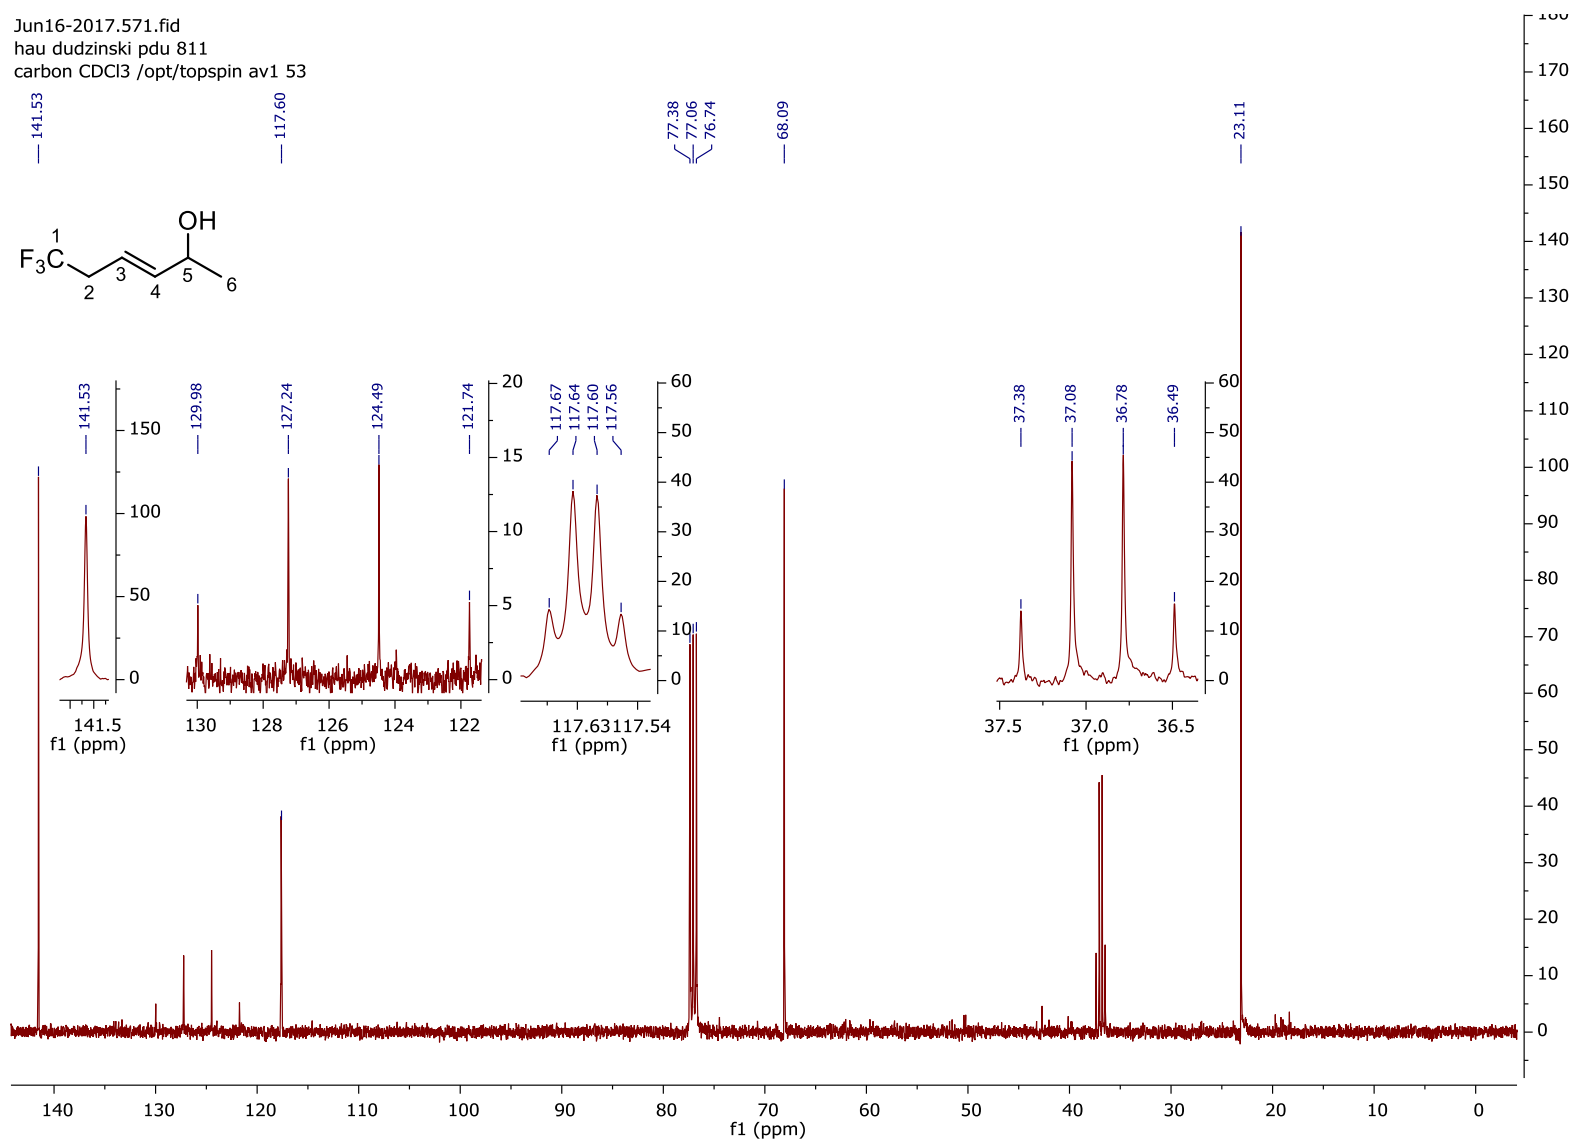

<sup>19</sup>F NMR spectrum of (*E*)-6,6,6-trifluorohex-3-en-2-ol (**42**)

Jun14-2017.353.fid  
hau dudzinski pdu 811 3  
f19cpd CDCl<sub>3</sub> /opt/topspin av1 58

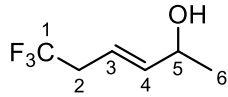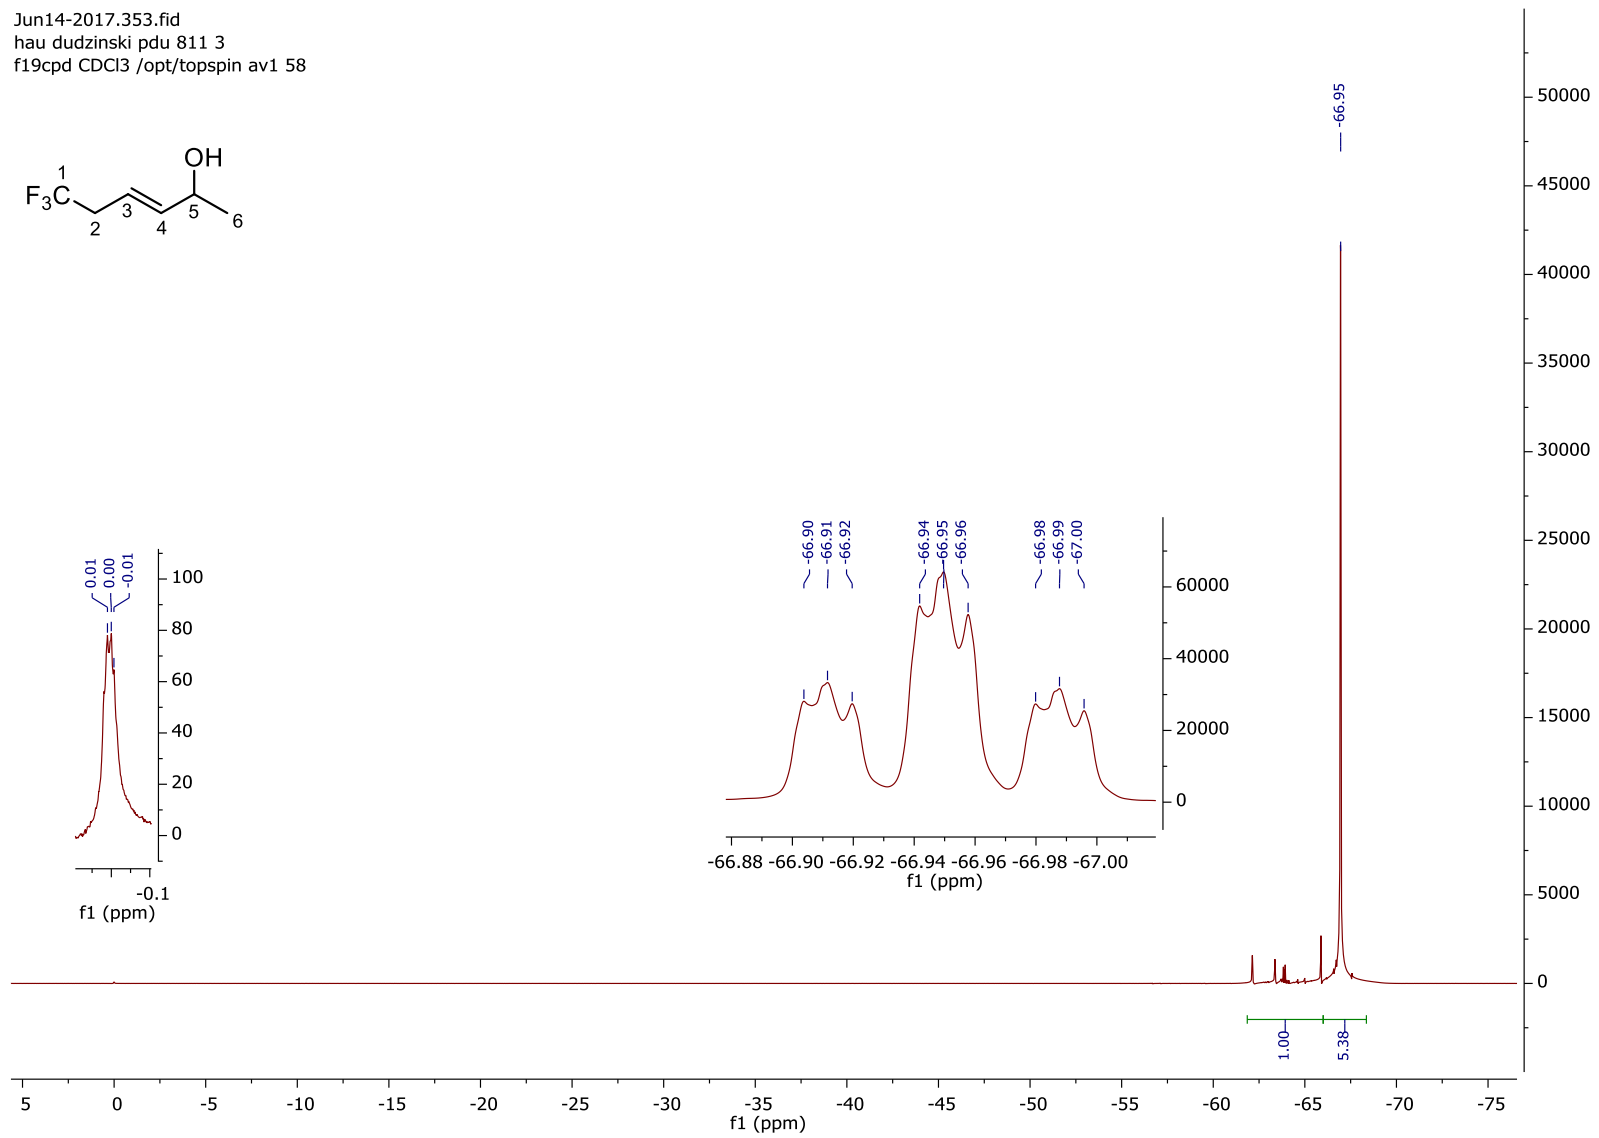

<sup>1</sup>H NMR spectrum of methyl (*E*)-2-chloro-3-(2,2,2-trifluoroethyl)hex-4-enoate (**43**) (*syn*- and *anti*-; 45:55 ratio)

Jun20-2017.320.fid  
 hau dudzinski pdu 812  
 proton CDCl3 /opt/topspin av1 32

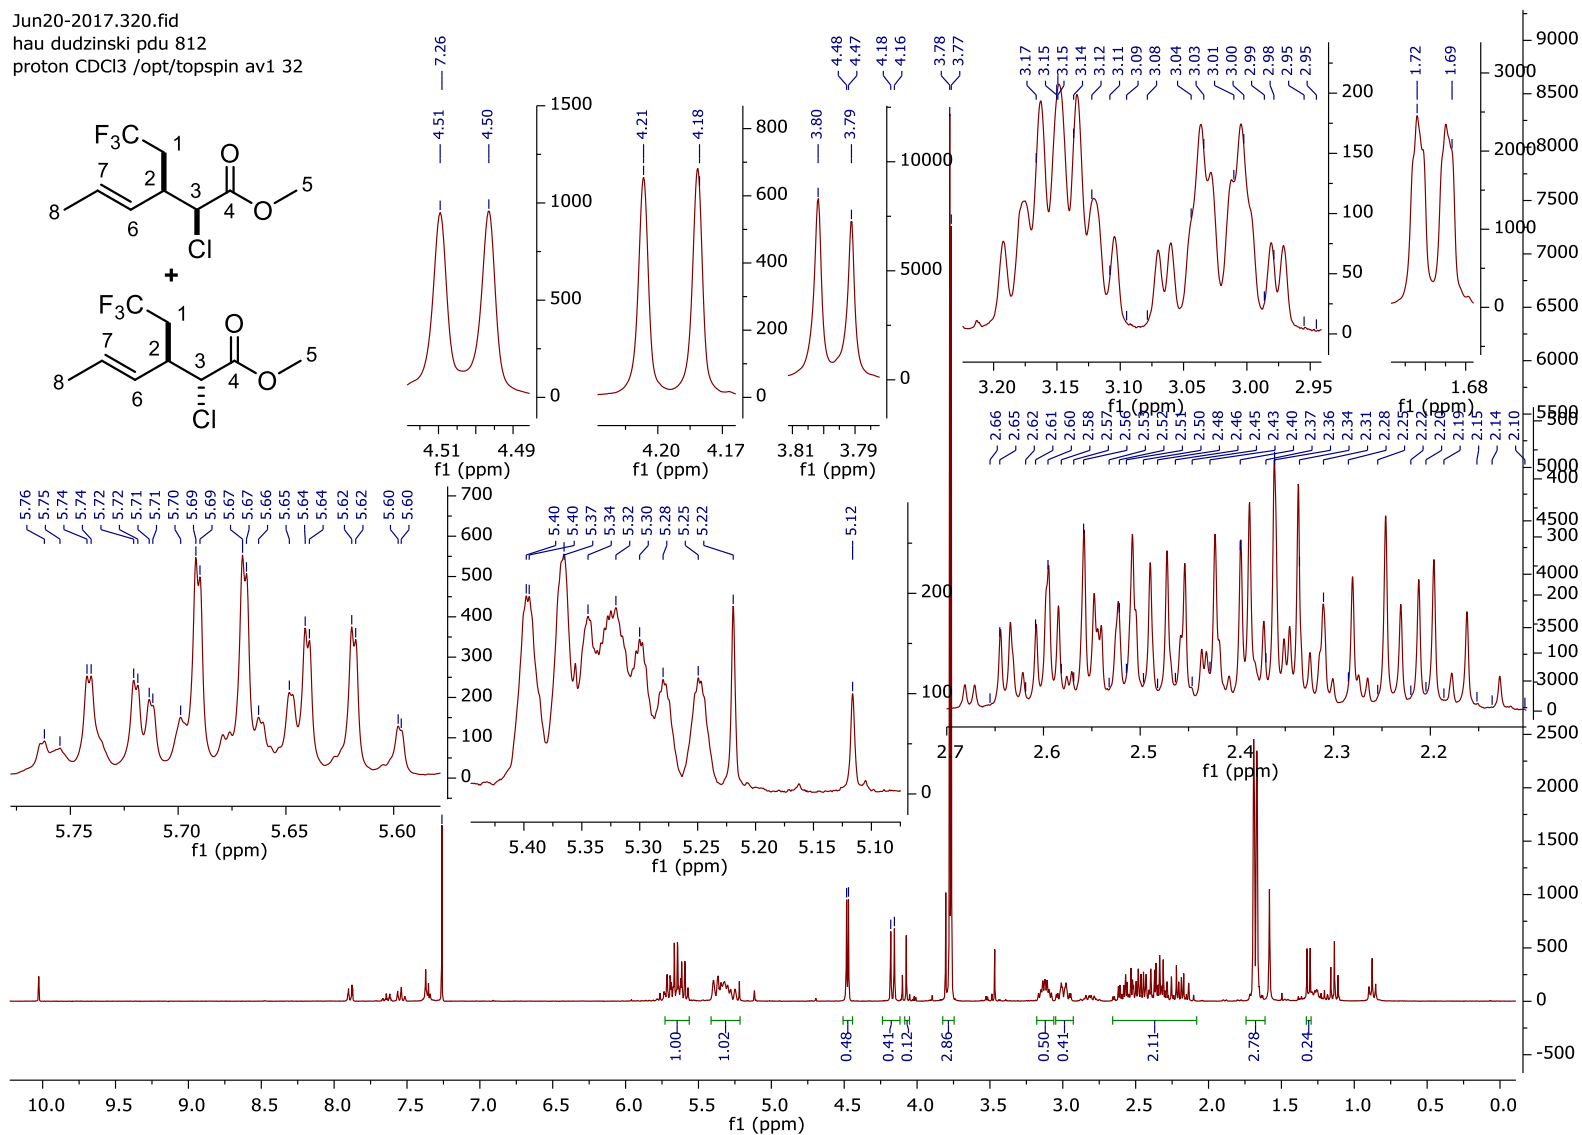

<sup>13</sup>C NMR spectrum of methyl (*E*)-2-chloro-3-(2,2,2-trifluoroethyl)hex-4-enoate (**43**) (*syn*- and *anti*-; 45:55 ratio)

Jun20-2017.321.fid  
hau dudzinski pdu 812  
carbon CDCl<sub>3</sub> /opt/topspin av1.32

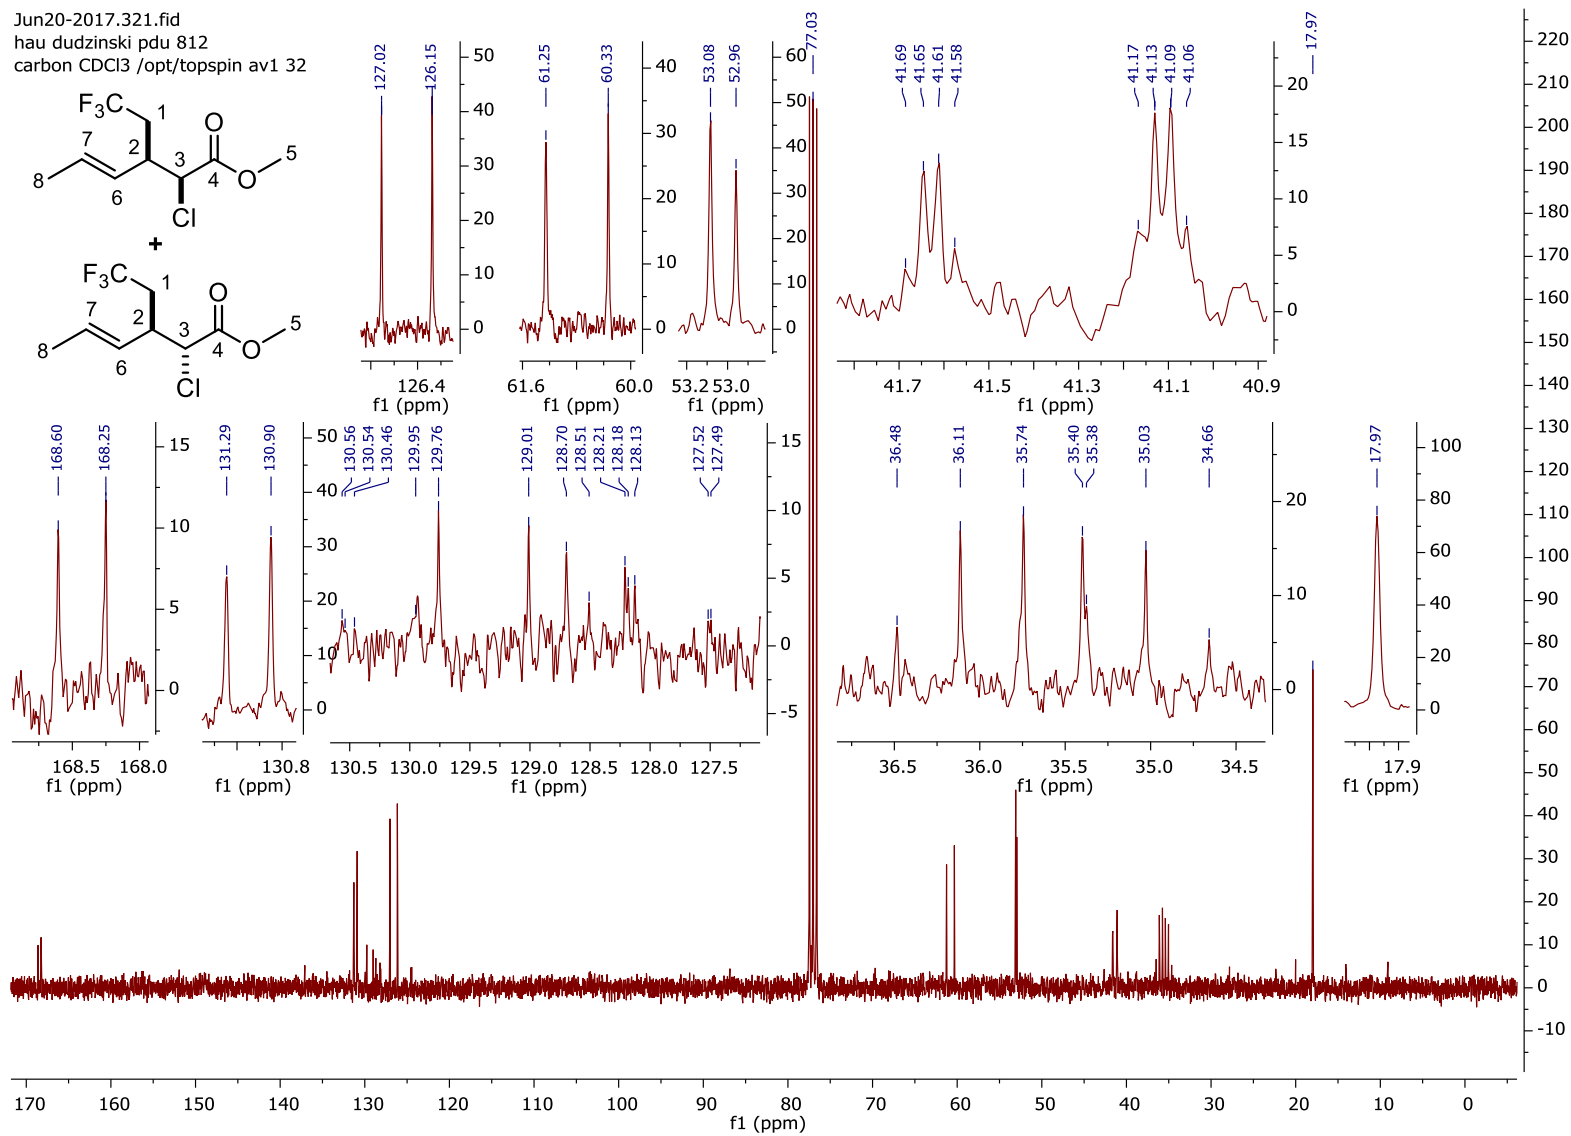

$^{19}\text{F}$  NMR spectrum of methyl (*E*)-2-chloro-3-(2,2,2-trifluoroethyl)hex-4-enoate (**43**) (*syn*- and *anti*-; 45:55 ratio)

Jun20-2017.323.fid  
hau dudzinski pdu 812  
f19cpd CDCl<sub>3</sub> /opt/topspin av1 32

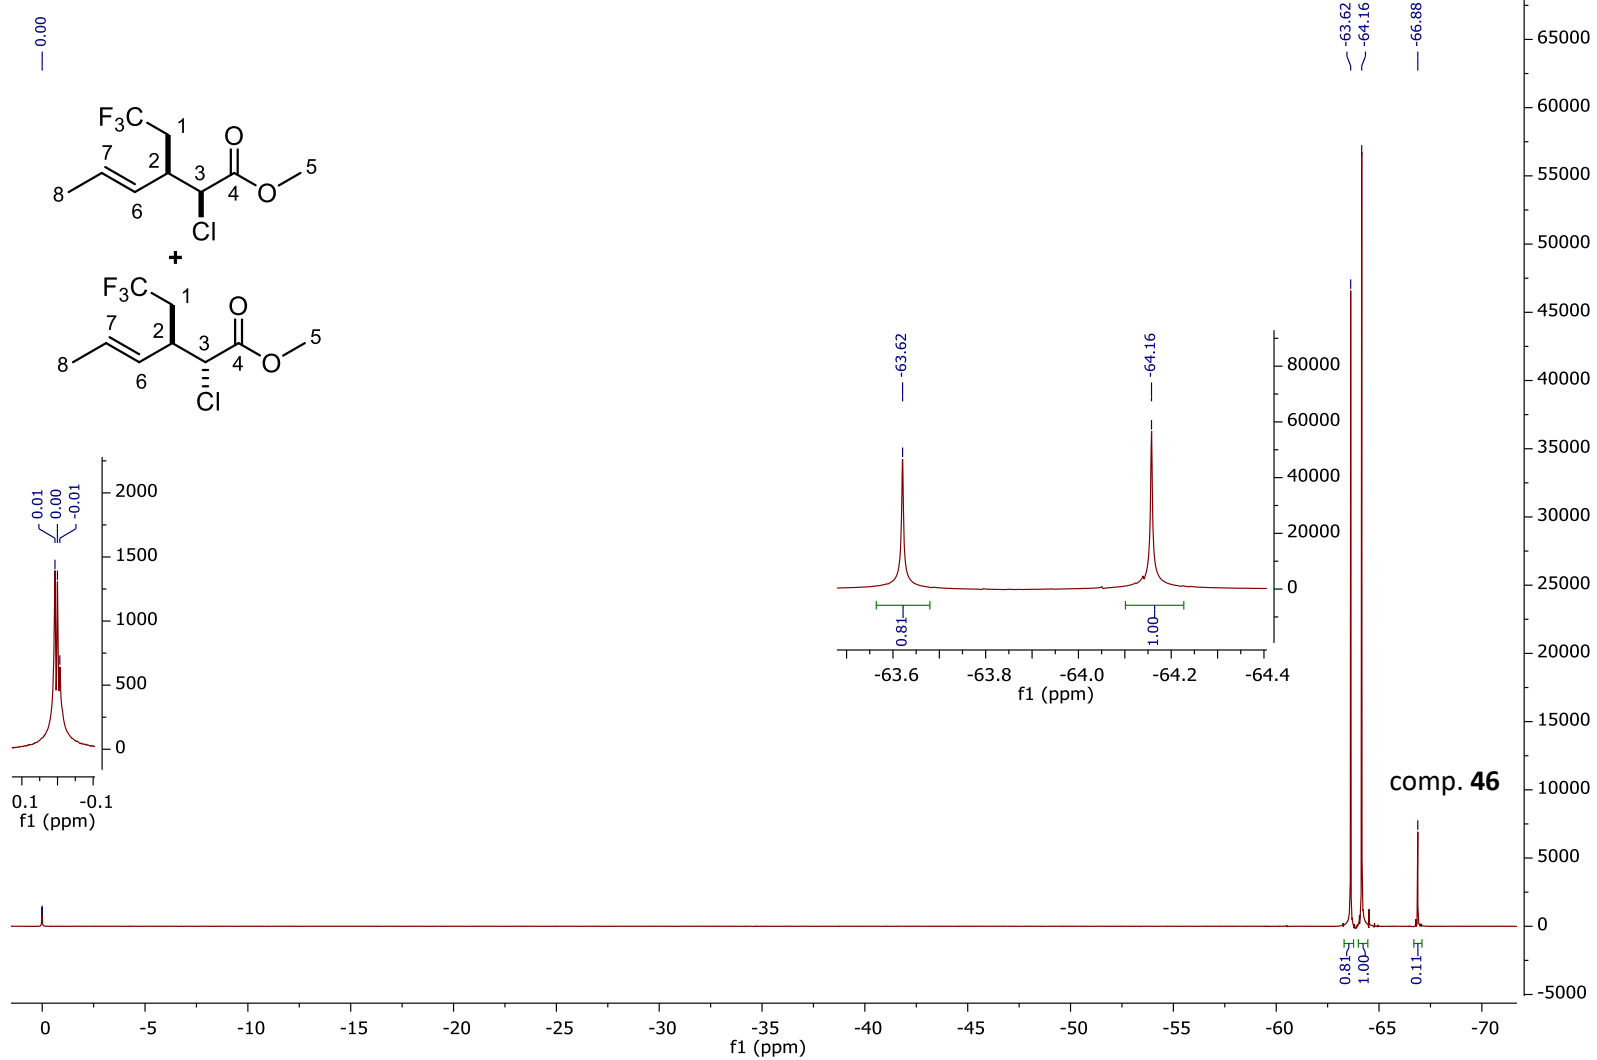

Supplement: d1ob00870f1.pdf [file d1ob00870f1.pdf]
